# Supplementary material for: Rapid discovery of terpene tailoring enzymes for total biosynthesis
Source: Royal Society of Chemistry journal article supplement (doi:10.1039/d3sc04172g), 2023-01-01
Supplement: d3sc04172g1.pdf [file d3sc04172g1.pdf]

## Rapid Discovery of Terpene Tailoring Enzymes for Total Biosynthesis

Yunlong Sun,<sup>[a]</sup> Jennifer Gerke,<sup>[a]</sup> Kevin Becker,<sup>[a]</sup> Eric Kuhnert,<sup>[a]</sup> Bart Verwaaijen,<sup>[b]</sup> Daniel  
Wibberg,<sup>[b]</sup> Jörn Kalinowski,<sup>[b]</sup> Marc Stadler<sup>[c]</sup> and Russell J. Cox<sup>\*[a]</sup>

### Electronic Supplementary Information

- a. Institute for Organic Chemistry, Leibniz Universität Hannover.
- b. CeBitec, University of Bielefeld.
- c. Helmholtz-Zentrum für Infektionsforschung, Braunschweig.

## Contents

|                                                                  |            |
|------------------------------------------------------------------|------------|
| <b>1. Cloning Procedures</b> .....                               | <b>3</b>   |
| 1.1 Genome Sequences and Annotation .....                        | 3          |
| 1.2 Oligonucleotides and General PCR .....                       | 3          |
| 1.3 RT-PCR for AoL4 and AoL1 .....                               | 3          |
| 1.4 Preparation of Competent Yeast .....                         | 4          |
| 1.5 Yeast Recombination .....                                    | 4          |
| 1.6 Plasmid Selection and Generation by <i>E. coli</i> .....     | 5          |
| <b>2. Constructed Vectors</b> .....                              | <b>12</b>  |
| <b>3. Transformation and Selection of <i>A. oryzae</i></b> ..... | <b>14</b>  |
| 3.1 Preparation of Protoplasts.....                              | 14         |
| 3.2 Transformation and Selection .....                           | 14         |
| <b>4. Fermentation, Analysis and Compound Purification</b> ..... | <b>16</b>  |
| 4.1 Fermentation and Extraction Protocols.....                   | 16         |
| 4.2 Analytical and Preparative LC-MS.....                        | 16         |
| 4.3 HRMS and NMR .....                                           | 16         |
| <b>5. Compound Characterization</b> .....                        | <b>19</b>  |
| Compound 2 .....                                                 | 20         |
| Compound 5 .....                                                 | 25         |
| Compound 6 .....                                                 | 26         |
| Compound 7 .....                                                 | 31         |
| Compound 8 .....                                                 | 36         |
| Compound 9 .....                                                 | 41         |
| Compound 10 .....                                                | 46         |
| Compound 11 .....                                                | 51         |
| Compound 12 .....                                                | 56         |
| Compound 13 .....                                                | 61         |
| Compound 14 .....                                                | 66         |
| Compound 15 .....                                                | 71         |
| Compound 16, 17 .....                                            | 76         |
| Compound 18 .....                                                | 82         |
| Compound 19 .....                                                | 87         |
| Compound 20, 21 .....                                            | 92         |
| Compound 22 .....                                                | 100        |
| Compound 23, 24 .....                                            | 105        |
| <b>6. References</b> .....                                       | <b>113</b> |

# 1. Cloning Procedures

## 1.1 Genome Sequences and Annotation

De novo gene predictions and annotations were made with the Funannotate package v1.8.9 (Jonathan M. Palmer, <https://github.com/nextgenusfs/funannotate>) using the following database versions; MEROPS v12.0, Uniprot release 2022\_01, dbCan 10.0, pfam v35.0, GO release 2022-01-13, MIBiG v1.4, Interpro 87.0, BUSCO outgroups v1.0, gene2product v1.75, EggnoG\_DB v5.0.2.

Annotated genome sequence files are available at:

1. *Xylaria hypoxylon*: <https://doi.org/10.6084/m9.figshare.23683644.v1>
2. *Hypoxylon rickii*: <https://doi.org/10.6084/m9.figshare.23652825.v1>

## 1.2 Oligonucleotides and General PCR

Oligonucleotides for PCR and RT-PCR were designed using Geneious and synthesized by SigmaGenosys and Eurofins. The PCR experiments were conducted using Q5<sup>®</sup> high-fidelity DNA polymerase (New England Biolabs) for the DNA fragment for heterologous expression, and OneTaq<sup>®</sup> DNA polymerase was used for colony PCR. The gDNA from candidate fungi was extracted using a GeneElute<sup>™</sup> Plant Genomic DNA Miniprep Kit (Sigma Life Science). The protocol of gDNA extraction was described in our previous literature.<sup>1</sup> The hypoxylan A BGC DNA fragments were cloned from cDNA of *Hypoxylon rickii* without introns. The DNA fragments of the PR-toxin BGC were directly cloned from the gDNA of *Penicillium roquefortii* with introns. The DNA fragments of the sporogen AO BGC were cloned from the gDNA of *A. oryzae* NSAR1. The exons DNA fragments of *xhr1* were cloned from the *Xylaria hypoxylon* gDNA and then connected to a CDS sequence.

## 1.3 RT-PCR for AoL4 and AoL1

The mycelia of *A. oryzae* NSAR1 and *A. oryzae* NSAR1 transformants containing HrTc were collected after being cultured in DPY medium for 5 days, then quickly frozen in liquid nitrogen and ground into powder. The RNA was extracted using Quick-RNA Fungal/Bacterial Microprep Kit (ZYMO), and the High Capacity RNA-to-cDNA<sup>™</sup> Kit was used to reverse RNA to cDNA. The protocol of RNA extraction and RNA reverse experiment was described in our previous literature.<sup>2</sup> The resulting cDNA was used as the templates for the amplification of *aoL4* and *aoL1* by 450-500 bp (Figure S1).

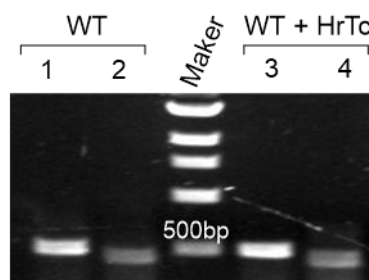

1. The band of AoL4 in WT
2. The band of AoL1 in WT
3. The band of AoL4 in WT+HrTc
4. The band of AoL1 in WT+HrTc

**Figure S1.** RT-PCR for the expression level of AoL4 and AoL1. Primers RT-PCR-*aoL4*-F and RT-PCR-*aoL4*-R were used for AoL4; RT-PCR-*aoL1*-F and RT-PCR-*aoL1*-R were used for AoL1

## 1.4 Preparation of Competent Yeast

All subsequent experiments utilised four vectors (pTYGs) that had been manipulated with different selection markers ( $\Delta argB$ ,  $sC$ ,  $adeA$ ,  $niaD$ ) for selection in *A. oryzae* NSAR1. The pTYGs vectors are equipped with the  $2\mu$  origin and the *colE1* gene which facilitate replication in *Saccharomyces cerevisiae* and *E. coli* respectively. The auxotrophy *URA3* gene and *carB* resistance gene were responsible for selection in *Saccharomyces cerevisiae* and *E. coli* respectively. The *ccdB* suicide gene was used as also a selection marker in *E. coli*. Every pTYGs vector includes four promoter and terminator combinations (P/*TamyB*, P/*Tadh*, P/*TgpdA*, and P/*Teno*). All four empty plasmids can be restricted by *Ascl* between P/*Tadh*, P/*TgpdA*, and P/*Teno* respectively, and P/*TamyB* could be restricted by *NotI* for yeast recombination.

Yeast was cultivated on YPAD agar at 30 °C for three days. A single colony was selected and incubated overnight in 10 mL YPAD media at 30 °C, 200 rpm. The 10 mL YPAD media was transferred to a 250 mL Erlenmeyer flask containing 40 mL fresh YPAD medium and incubated at 30 °C with 200rpm shaking for additional 4 hours. To collect the cells, the medium was centrifuged at 3,000 g for five minutes. The pellet was rinsed with 25 mL of ddH<sub>2</sub>O and centrifuged, then this step was repeated. The pellet was suspended in a Falcon tube containing a total of 5ml Lithium acetate (LiOAc, 0.1 M) and each 50  $\mu$ L was transferred into a separate 1.5 mL Eppendorf reaction tube. For immediate use, each sample was pelleted at 21,000 g for 15 s and the pellet was used for the yeast transformation. For cell stocking, instead of using LiOAc in the initial stage, FCC solution was used to stock frozen competent yeast cells. The pellet was suspended in 5 mL of FCC solution before being divided into 50  $\mu$ L portions and placed into individual 1.5 mL Eppendorf reaction tubes. Samples were stored at -80 °C. For thawing, samples were first incubated on ice and then centrifuged for 15 s at 21,000 g. The cells were employed for the yeast transformation process after the FCC solution was withdrawn.

## 1.5 Yeast Recombination

The following components were added to the pellet in order:

1. 50  $\mu$ L ssDNA;
2. 36  $\mu$ L 1 M LiOAc;
3. 34  $\mu$ L DNA mix with linearized plasmid and appropriate inserts;
4. 240  $\mu$ L PEG solution;

The uncut plasmid served as a positive control, whereas the linearized plasmid served as a negative control. The particulate was suspended in the transformation mixture and incubated at 30 °C for 30 minutes with shaking by 300 rpm, followed by 42 °C for 40 minutes. The cells were pelleted at 13,000 g for 60s to get the pellet, and the supernatant was removed. The pellet was suspended in 200  $\mu$ L ddH<sub>2</sub>O and distributed on selective SM-Ura plates, which were then incubated at 30 °C for three days. The extraction of yeast plasmid was performed utilising the Zymoprep™ Yeast Plasmid Miniprep II kit (Zymo Research, Orange, California, USA).

## Media and solution

### SM-URA Agar

0.17 % (w/v) Yeast nitrogen base (Sigma Aldrich); 0.50 % (w/v) Ammonium sulfate (Roth); 2.00 % (w/v) D(+)-Glucose Monohydrate (Roth); 0.077 % (w/v) Complete supplement mixture minus Uracil (Sigma Aldrich); 1.50 % (w/v) Agar (Duchefa Biochemie)

### YPAD Agar/medium

1.00 % (w/v) Yeast extract (Duchefa Biochemie); 2.00 % (w/v) Tryptone (Duchefa Biochemie); 2.00 % (w/v) D (+)-Glucose Monohydrate (Roth); 0.03 % (w/v) Adenine (Roth); 1.50 % (w/v) Agar (Duchefa Biochemie)

FCC solution: 5% (v/v) glycerol; 10% (v/v) DMSO in ddH<sub>2</sub>O

PEG solution: 50% (w/v) polyethylene glycol 3350 in ddH<sub>2</sub>O

ssDNA: 2 mg/mL salmon sperm DNA in TE buffer, denatured at 98 °C for 5 minutes

## 1.6 Plasmid Selection and Generation by *E. coli*

After the total plasmids extraction of yeast, all the plasmids were transferred to *E. coli* competent cells. 50  $\mu$ L *E. coli* competent cells (Top10 or *ccdB* Survival TM 2 T1R, Thermo Fisher Scientific, USA) was used to mix with the yeast total plasmids and incubated on ice for up to 25 min. Following a heat shock of 90 seconds at 42 °C, the cells were subsequently transferred on ice for 3 minutes. Subsequently, 500  $\mu$ L of SOC medium was introduced to the cells. The cells were subjected to incubation at 37 °C, 200 rpm for 1 hour. Subsequently, they were evenly distributed onto LB agar plates that were supplemented with antibiotics. The plates were then left to incubate overnight at 37 °C. 14 colonies of each plasmid were chosen and suspended in 14 tubes containing 10  $\mu$ L ddH<sub>2</sub>O as a template for colony PCR. Different sets of primers were used to detect all of the genes in each plasmid. Three positive colonies of each plasmid were selected and grown overnight in a 50 mL LB medium containing antibiotics. The *E. coli* cells were harvested by centrifuge. A NucleoSpin Plasmid Kit (MACHEREY-NAGEL) was used to get the pure plasmid. A DNA sequencing kit (Eurofins Genomics) was used to confirm the sequences of all plasmids.

### Media and antibiotics

LB Agar/medium

0.50 % (w/v) Yeast extract (Duchefa Biochemie); 1.00 % (w/v) Tryptone (Duchefa Biochemie); 0.50 % (w/v) Sodium chloride (Roth or VWR); 1.50 % (w/v) Agar (Duchefa Biochemie)

SOC medium

0.50 % (w/v) Yeast extract (Duchefa Biochemie); 2.00 % (w/v) Tryptone (Duchefa Biochemie); 0.06 % (w/v) Sodium chloride (Roth or VWR); 0.02 % (w/v) Potassium chloride (Roth); To be added: 25 mM final concentration Magnesium chloride hexahydrate 2M (Roth); 1.0 % final concentration D(+)-Glucose Monohydrate 20 % (Roth)

Carbenicillin

Stock concentration is 50 mg·mL<sup>-1</sup> in ddH<sub>2</sub>O, working concentration is 50  $\mu$ g·mL<sup>-1</sup>;

Chloramphenicol

Stock concentration is 30 mg·mL<sup>-1</sup> in ethanol, working concentration is 30  $\mu$ g·mL<sup>-1</sup>

**Table S1** Oligonucleotide sequences

| <b>Primer</b> | <b>Sequence (5'- 3')</b>                             | <b>Purpose</b>                                                                                                       |
|---------------|------------------------------------------------------|----------------------------------------------------------------------------------------------------------------------|
| Pamy-hrtc-F   | CTGAACAATAAACCCACAGCAAGCTCCGAATGGCGCCAATGGTCGACGA    | HrTc forward                                                                                                         |
| Pamy-hrtc-R   | ACTCTCCACCCTTCACGAGTACTACAGATTAGGTGGCCGGCTGCACAT     | HrTc reverse                                                                                                         |
| Padh-hrl4-F   | TTCTTTCAACACAAGATCCCAAAGTCAAAGATGCTCTCCTACATGCTCCC   | HrL4 forward                                                                                                         |
| Padh-hrl4-R   | TTTCATTCTATGCGTTATGAACATGTTCCCTTAATTCAATGGAACCCCTC   | HrL4 reverse                                                                                                         |
| Pgpd-hrl5-F   | ACAGCTACCCCGCTTGAGCAGACATCACCGATGGTTAAGTTGACTTCGA    | HrL5 forward                                                                                                         |
| Pgpd-hrl5-R   | TACGACAATGTCCATATCATCAATCATGACCTACGTCAACCAGGGCTTGA   | HrL5 reverse                                                                                                         |
| Peno-hrl8-F   | CGACTGACCAATTCCGCAGCTCGTCAAAGGATGGCATCACTCAGGATTGA   | HrL8 forward                                                                                                         |
| Peno-hrl8-R   | CAGGTTGGCTGGTAGACGTCATATAATCATTTAGCGGAAGTCTGTGCGCG   | HrL8 reverse                                                                                                         |
| Pamy-hrl3-F   | CTGAACAATAAACCCACAGCAAGCTCCGAATGGAGGAAGGCTTGATTGC    | HrL3 forward                                                                                                         |
| Pamy-hrl3-R   | ACTCTCCACCCTTCACGAGTACTACAGATTAGGACGAGAGCGCATCTC     | HrL3 reverse                                                                                                         |
| Padh-hrl1-F   | TTCTTTCAACACAAGATCCCAAAGTCAAAGATGTCGTCGACTCCCGTGCT   | HrL1 forward                                                                                                         |
| Padh-hrl1-R   | TTTCATTCTATGCGTTATGAACATGTTCCCTTAGACTGCCGCTTCCGCC    | HrL1 reverse                                                                                                         |
| Pgpd-hrl7-F   | ACAGCTACCCCGCTTGAGCAGACATCACCGATGTTCCGGAACAGATGCTCT  | HrL7 forward                                                                                                         |
| Pgpd-hrl7-R   | TACGACAATGTCCATATCATCAATCATGACTTAGTGCTCTACCAACTTTG   | HrL7 reverse                                                                                                         |
| Padh-prl3-F   | TTCTTTCAACACAAGATCCCAAAGTCAAAGATGGCCGTGATCTTCTCCTC   | PrL3 forward                                                                                                         |
| Padh-prl3-R   | TTTCATTCTATGCGTTATGAACATGTTCCCTCAGGCCTTGAGACGCTCTT   | PrL3 reverse                                                                                                         |
| Pgpd-prl4-F   | ACAGCTACCCCGCTTGAGCAGACATCACCGATGAACGCCTCAAAGTTGCC   | PrL4 forward                                                                                                         |
| Pgpd-prl4-R   | TACGACAATGTCCATATCATCAATCATGACCTAGCCAGTCTTGACGTCTG   | PrL4 reverse                                                                                                         |
| Pgpd-prl7-F   | ACAGCTACCCCGCTTGAGCAGACATCACCGATGACCATATCTCCAATCCC   | PrL7 forward                                                                                                         |
| Pgpd-prl7-R   | TACGACAATGTCCATATCATCAATCATGACCTATGCCTTGAGTGTGCTAC   | PrL7 reverse                                                                                                         |
| Peno-prl9-F   | CGACTGACCAATTCCGCAGCTCGTCAAAGGATGGATGCACCTCAGGGCTCC  | PrL9 forward                                                                                                         |
| Peno-prl9-R   | CAGGTTGGCTGGTAGACGTCATATAATCATCTAATCGACTTCTGTGTTTA   | PrL9 reverse                                                                                                         |
| Padh-aol3-F   | TTTCTTTCAACACAAGATCCCAAAGTCAAAATGTTTGAGGGCGCTACAC    | AoL3 forward                                                                                                         |
| Padh-aol3-R   | TTCATTCTATGCGTTATGAACATGTTCCCTCTATGTGCACCTTCTCCGTT   | AoL3 reverse                                                                                                         |
| Pgpd-aol2-F   | TAACAGCTACCCCGCTTGAGCAGACATCACATGACTCTAATATCGCTGTC   | AoL2 forward                                                                                                         |
| Pgpd-aol2-R   | ACGACAATGTCCATATCATCAATCATGACCTACTGCGCACTAATCTCA     | AoL2 reverse                                                                                                         |
| RT-PCR-aol4-F | TGTTTTCAATACAATGGAACGATTC                            | RT-PCR for AoL4                                                                                                      |
| RT-PCR-aol4-R | GGCGAATGTGGCATACTTCCACTGG                            | RT-PCR for AoL4                                                                                                      |
| RT-PCR-aol1-F | AGGAGGAAGCTCAGGGATTGCTGG                             | RT-PCR for AoL1                                                                                                      |
| RT-PCR-aol1-R | GCCTAATTTGCTTGCACCTATAGACC                           | RT-PCR for AoL1                                                                                                      |
| Padh-2XhR1-F1 | TTTCTTTCAACACAAGATCCCAAAGTCAAAATGACAGCCAAAATGTTTCGA  | CDS part1 forward                                                                                                    |
| Padh-2XhR1-R1 | TAGAGTCTATCAACAAACGA                                 | CDS part1 reverse                                                                                                    |
| Padh-2XhR1-F2 | TGCAAGAAAGTCGTTTGTGATAGACTCTATCGTCGGTTTGGTGATACGC    | CDS part2 forward                                                                                                    |
| Padh-2XhR1-R2 | GCATAGCACTCTTGGGCATT                                 | CDS part2 reverse                                                                                                    |
| Padh-2XhR1-F3 | AGATGTTTGAATGCCAAAGAGTGCTATGCACATATATCGCAACGACAAG    | CDS part3 forward                                                                                                    |
| Padh-2XhR1-R3 | TCGCGTTGCCGTTCTATAGTGATGGTGCCACACGCGGAGATGAGCTGGTA   | CDS part3 reverse                                                                                                    |
| Padh-2XhR1-F4 | TGGCACCATCACTATAGAAC                                 | CDS part4 forward                                                                                                    |
| Padh-2XhR1-R4 | GCTGTAAGAACGAACAGATC                                 | CDS part4 reverse                                                                                                    |
| Padh-2XhR1-F5 | TGCAAGCGAGGATCTGTTTCGTTCTTACAGCTGCAACC GCAAATGCTATGC | CDS part5 forward                                                                                                    |
| Padh-2XhR1-R5 | AGGTTGGCTGGTAGACGTCATATAATCATACTAAGAATGCTTACAGTGG    | CDS part5 reverse                                                                                                    |
| PamyB_S-F     | CATGCTTGGAGGATAGCAACCG                               | For sequencing,<br>located in PamyB                                                                                  |
| PamyB_S-R     | ACTCCAACGTACATCAAACCTCA                              |                                                                                                                      |
| Padh plugF    | ATTCACCCTATTATTCCCACCCCTATAATA                       | For PCR fragments<br>to close the <i>AscI</i><br>cloning site<br>without targeting<br>DNA and also for<br>sequencing |
| Padh plugR    | GAGACGAAACAGACTTTTTTCATCGCTAAAA                      |                                                                                                                      |
| PgdpA plugF   | CTTTTCTTTTCTCTTTCTTTTCCCATCTTC                       |                                                                                                                      |
| PgpdA plugR   | TACGACAATGTCCATATCATCAATCATGAC                       |                                                                                                                      |
| Peno plugF    | CTTCTTAAATATCGTTGTAAGTGTTCCTGA                       |                                                                                                                      |
| Peno plugR    | CGAAGTATATTGGGAGACTATAGCTACTAG                       |                                                                                                                      |

**Table S2** Gene annotations of PR-toxin BGC

| <b>Locus tag</b> | <b>Label</b> | <b>Predicted protein function</b>        | <b>Domain hits</b>                                                                                    |
|------------------|--------------|------------------------------------------|-------------------------------------------------------------------------------------------------------|
| S02g001477       | PrL10        | Oxidoreductase BOA17                     | 17beta hydroxysteroid dehydrogenase-like                                                              |
| S02g001475       | PrL9         | Cytochrome P450 monooxygenase ORF11      | CYP60B-like                                                                                           |
| S02g001474       | PrL8         | Transcription factor ORF10               | GAL4-like Zn <sub>2</sub> Cys <sub>6</sub> binuclear cluster DNA-binding domain                       |
| S02g001473       | PrL7         | Cytochrome P450 monooxygenase ORF9       | CYP60B-like                                                                                           |
| S02g001472       | PrL6         | Eremophilane O-acetyltransferase ORF8    | Transferase                                                                                           |
| S02g001470       | PrL5         | Hypothetical protein                     | DUF3237 domain-containing protein with a beta-barrel structure                                        |
| S02g001469       | PrL4         | Cytochrome P450 monooxygenase ORF6       | CYP56-like                                                                                            |
| S02g001468       | PrL3         | Cytochrome P450 monooxygenase ORF5       | CYP56-like                                                                                            |
| S02g001467       | PrL2         | Short-chain dehydrogenase/reductase prx4 | Insect-type alcohol dehydrogenase (ADH)-like, classical (c) SDRs                                      |
| S02g001466       | PrL1         | FAD-dependent monooxygenase Prx3         | FAD/FMN-containing dehydrogenase                                                                      |
| S02g001465       | PrTc         | Aristolochene synthase                   | Non-plant Terpene Cyclases, Class 1                                                                   |
| S02g001464       | PrR1         | Short-chain dehydrogenase/reductase Prx1 | Retinol-DH_like_SDR_c_like                                                                            |
| S04g000591       | PrR2         | Short-chain dehydrogenase/reductase Prx7 | Insect-type alcohol dehydrogenase (ADH)-like, classical (c) SDRs                                      |
| S04g000592       | PrR3         | Short-chain dehydrogenase/reductase Prx6 | Insect-type alcohol dehydrogenase (ADH)-like, classical (c) SDRs                                      |
| S04g000593       | PrR4         | MFS-type transporter Prx5                | Fungal trichothecene efflux pump (TRI12) of the Major Facilitator Superfamily of transporters         |
| S04g000594       | PrR5         | Up-frameshift suppressor 2 homolog       | Middle domain of eukaryotic initiation factor 4G, Up-frameshift suppressor 2                          |
| S04g000595       | PrR6         | Unnamed protein product                  | /                                                                                                     |
| S04g000595       | PrR7         | Plasmid maintenance protein 2            | Forkhead-associated (FHA) domain found in <i>Saccharomyces cerevisiae</i> plasmid maintenance protein |

**Table S3** Gene annotations of sporogen AO1 BGC

| <b>Locus tag</b> | <b>Label</b> | <b>Predicted protein function</b>  | <b>Domain hits</b>                           |
|------------------|--------------|------------------------------------|----------------------------------------------|
| AO090011000096   | AoL7         | Transcription factor               | Fungal_TF_MHR                                |
| AO090011000097   | AoL6         | Drug resistance transporter        | MFS_Azr1_MDR_like; efflux_EmrB               |
| AO090011000098   | AoL5         | Unnamed protein product            | /                                            |
| AO090011000099   | AoL4         | Cytochrome P450 monooxygenase ORF9 | CYP60B-like; CypX; p450                      |
| AO090011000100   | AoL3         | Cytochrome P450 monooxygenase BraC | CYP60B-like; CypX; p450                      |
| AO090011000101   | AoL2         | Cytochrome P450 monooxygenase TpcC | CYP60B-like; CypX; p450                      |
| AO090011000102   | AoL1         | Short-chain dehydrogenase Prx4     | FabG; ADH_SDR_c_like; adh_short              |
| AO090011000103   | AoTc         | Aristolochene synthase             | Terpene_cyclase_nonplant_C1; Terpene_syn_C_2 |

**Table S4** Gene annotations of hypoxylan A BGC

| Locus_tag | Label | Predicted protein function          | Domain hits                                               |
|-----------|-------|-------------------------------------|-----------------------------------------------------------|
| Hr2g6175  | HrL10 | Trichothecene 8-O-acetyltransferase | Transferase                                               |
| Hr2g6176  | HrL9  | Unnamed protein product             | /                                                         |
| Hr2g6177a | HrL8  | Short-chain dehydrogenase Prx4;     | FabG; ADH_SDR_c_like                                      |
| Hr2g6177b | HrL7  | Cytochrome P450 monooxygenase ORF11 | CYP60B-like; CypX; p450                                   |
| Hr2g6177c | HrL6  | Transcription factor ORF10          | Zn(II) <sub>2</sub> Cys <sub>6</sub> transcription factor |
| Hr2g6178  | HrL5  | Short-chain dehydrogenase EriB      | Rossmann-fold NAD(P)-binding domain                       |
| Hr2g6179  | HrL4  | FAD-dependent monooxygenase Prx3    | FAD_binding_4                                             |
| Hr2g6180  | HrL3  | Cytochrome P450 monooxygenase ORF9  | CYP60B-like; CypX; p450                                   |
| Hr2g6181  | HrL2  | SAT4 family membrane protein        | No putative conserved domains                             |
| Hr2g6182  | HrL1  | Cytochrome P450 monooxygenase BraC  | CYP503A1-like; CypX                                       |
| Hr2g6183  | HrTc  | Aristolochene synthase              | Terpene_cyclase_nonplant_C1; Terpene_syn_C_2              |

**Table S5** Gene annotations of eremoxylarin D BGC

| Locus_tag | Label | Predicted protein function                             | Domain hits                                                          |
|-----------|-------|--------------------------------------------------------|----------------------------------------------------------------------|
| 7855_g    | XhL9  | Cytosine/purine transport protein FcyB                 | CodB; SLC-NCS1sbd_CobB-like                                          |
| 7856_g    | XhL8  | Highly reducing polyketide synthase AzaB               | PKS_KS; PS-DH; PKS_KR; Enoyl_red; PP-binding; PKS_MT                 |
| 7857_g    | XhL7  | Cytochrome P450 monooxygenase ORF11                    | CYP60B-like; CypX; p450                                              |
| 7858_g    | XhL6  | Short-chain dehydrogenase Prx4                         | FabG; ADH_SDR_c_like                                                 |
| 7859_g    | XhL5  | MFS-type transporter AstH, drug resistance transporter | MFS_Azr1_MDR_like; Efflux_EmrB                                       |
| 7860_g    | XhL4  | Cytochrome P450 monooxygenase ORF6                     | CYP56-like                                                           |
| 7861_g    | XhL3  | Cytochrome P450 monooxygenase ORF9                     | CYP60B-like; CypX; p450                                              |
| 7862_g    | XhL2  | FAD-dependent monooxygenase Prx3                       | FAD_binding_4                                                        |
| 7863_g    | XhL1  | Eremophilane O-acetyltransferase Prx11                 | Transferase; PLN02663                                                |
| 7864_g    | XhTc  | Aristolochene synthase                                 | Terpene_cyclase_nonplant_C1; Terpene_syn_C_2                         |
| 7865_g    | XhR1  | Cytochrome P450 monooxygenase EfuG                     | CYP7_CYP8-like; CypX                                                 |
| 7866_g    | XhR2  | Short-chain dehydrogenase eriB                         | Retinol-DH_like_SDR_c_like; PRK06197                                 |
| 7867_g    | XhR3  | C6 finger domain transcription factor AclZ             | GAL4-like Zn(II) <sub>2</sub> Cys <sub>6</sub> ; Fungal Zn(2)-Cys(6) |



## Protein Sequences

HrTc

MAPMVDEYVSEPEPEVLLTQKKTTPAATSAQATLIVPSSDLTAQIHPRHEKVI AEVDGYFLQHWPFPD GKARKKFLA  
AGFSRVTCLYFPKALDDRIHHACRLLTLLFLIDDILEHMSLEDGRAYNERLMPLFRGTVLPDRSIPVEWISYDLWESM  
RAHDKGMADEIIEPVFTFMRAQTDSTRITEMGLGQYLDYRERDVGKALLAALMRFSMALTVPSPDLELVRPVDRN  
CSKHLSVVNDIWSYEKEVLAAQTLHEEGGMLCTAVAVFSKEAEISPEASKRVLYHLCREWELEHRTLVAKVLAQKDT  
PVLRAYLQGLEFQMSGNELWSRRTTLRYVQPAT

HrL1

MSSTPVLDLTLSTRLFNDSVAWASSLDKNDIKGLLLLTTVTLIWRYLSQPKQRLVPGIPVIGGASSKDRIKNRERFRH  
DSQAMLKEGYFRNNVDGGFFYPSPLGERLMLPIRYLEDLKTAPMDKVDVFGTFIEMFEGKYTTFGSRSTLHPRTVK  
ADLNQHLDPVMMMDVQDEIAECFDEIFPKCSETEWTEVPLVDVITRIVARVSSRMFGGPELSRNSWVAASIAFAID  
GYIGAQKLKRYPEFLKALVRFIPEVRNLAKYYQEAENAALPMLAAREHMTERPKDLLAWMQEAAVGEEDHRFIA  
GILLKISFAAIHTTAAANSQIFDLCANPELIPMLREEYEKVANEDGKIGKRGFFQM HIMDSIMKESQRFNPLLLITFER  
IVTEDWRLSDGFVIPAHTNIGVPAQAIAMDPKLHPNPETFDGLRFMKLREATNDPAVKGAQFAAANPQSMAFG  
YGRHACPRGFFASDEIKAITMYLLNHYEIKFAEGQTRPKSMEVETQFLPDHAATILCKRRKAUV

HrL3

MEEGLIAMLKAHWVRVTGTLVIGYCLSHIVNLYFHPLAKFPGPFLARSTLLWRFKNTMGGQRHRVFRVEHQKYG  
DVFRVSPNELSFASVQSYRDIYGFPPAGQAQFIKSDFYDVFSGFKTGICIGSERDPKVHAAKKHLLAAFSRSLAAQ  
ESIIQRCTDAFVAKVGPLSRKDKAGIDMTKWFEMNAFDLLGEMAFGESFGCIAEEKHHFWIDLILTHLREIVLVDNLR  
RFRILATLGKLLPLSLATKVRATHQQYSRDKVQRRELESKSPRQDFFTNIVAKVKSGEVGLEELTAHASTLIAGGETTAT  
TLTAAALYILRAPEVRSKLTDEIRGRYKSYDEIDSASALQLPYLQAVINEALRVHPSGAHGFQRISPGATVDGHWVPA  
GTEVYTSTWSVSHDKRYFEDPDAFRPERWVDPESKDIKEASQPFLGYRACIGRSFAFVEMSLVLAKLFYSYDMELV  
DGDLDWETQSRHWVMWVKAPVRIRARDALSS

HrL4

MLSYMLPRLFLQLGLLALSAMALSVSRTGKESNLGRLQEGATGACDALSALPDHVFVWPDSSDYLNQSQNVWS  
QTCVKTPQCVFEPADVAALSQGLKLIHDAESQFAFRAGGHMPVPGAQSLDDGVMISASKFNTNNSADGSIASVG  
PGQTWMDVYQWLAPRGLAINGGRFSPVGVGGLLVGGMGYFSGTQGWAVDDIVGWQVVLWNGTVLELVDA  
AQDPNADLAWALRGGSNLFLVTRFDVTRTFPVTSAFGGLTVWSSAAGPEVLGSLASFMAPGGGVDDPKAHIDVF  
SGISFPNGTPTLEYNIALYLGEEGPAALENFTAIPEDVTVSNGVAVHDSWTAIPQQLDSFSTRALRNLFYAISEAT  
EESVKLYNKTIVENAVEMISDVKGLTTYAVYQPISSKFLASKAKGSNVLGLDPDADGSFIAGIVLSMWENAEDDEAV  
LEFSRVSAAQIREQTEALGLHNTFTYLGDSAQGGQSPFKSYANGKNLERLRAIRDKYDPDGFLELYLHRGFPLN

HrL5

MVKLDFDLKRDVPELTGKVLITGGTNGLGAATAKMLASRSPAKIYITGRNESSAQRVIAGIKSTGSTTEVVWIGCDH  
TKLETVKEAADTILARETRLDVLMANAGIMALPPGLTKDGYELHFGINHVAHALLIRKLLGLLQKTVKEHGEARIPIA  
SLALVLAPRKHGIVFDDLKTTQAYWLLGKWQRYAQSKLANLIYGRELARRYPEILTVVVDPGPSNTGLVSGLGFLDK  
MIVYMGNIINRFLDDDDQGHNLQVWAVGVPKDKVKHGFEFYPVGKLTGYTHWCLDQKLAELKLDWWTTEEQLKPW  
LT

HrL7

MFGTDALGPVAHHVISWYQHLWILLAGIIVAKILYNGIYNVYFHPLSRFPGPRLAACS NVSFSKAFLRGRQPYETLRL  
HRRYGPVVRVAPNELSFNTAQSFRTDIYGRFPGHKT FVKSTFYEGGSFAAKGVSSIVSERDPVHVGQMRRLLSHAFSN  
SSLLEQEELVTESVDQFVRRMRGNVCERVDIADLLERMAFDIIGNLAFGETFGALDTERHPWIAITMGALTKGALV  
DSFKRFPMLASIVKLIMHKQIAALIDDTNKNEDLAIKLVKRRVSLPITRKDFLTRILAQRAQVDADPDSKHQHKVSDVE  
LAAHVSDVFLAGSETTSTVLSTATYLLKTPSVYEKLASEIRSTFRTAGINEATTRDLVYLVNAVCKEAMRIYAPLPLGLP  
REVPEGGDVTVDGHFLPAGTIVATNPIAASLDSTNFTDPLSFKPERWLDGYQGEDDLEASQPFLGPRGCLGKSLGW  
MEMRQTLAKLIWNFDLELADPDLWQRDSRMYTLWSKPHLHVRAKLVEH

HrL8

MASLRIDEYSIPDLTDKVAVITGGSSGIGFAAAKILLSKNATVHVLDVNAPSGASPGDIEPWQSWAAFHFHRCNVTS  
WAEQLAAFDAIGRVDVMVFANAGVSEPHDYFTHESLVDGREPSYGGLDVNFVGLHTVTLARRSMRAHGVREGS  
VVITISAVAYAPEQSLPVFAATKIALVGLVRSRSTMLAQEGITINGVAPAATVTSLLPPLAAPIVAMGLPISNAGFV  
GRALVYAATAKQDRKVEVYGKESDSELWLKENQERYNGRVILTLDGTSELEGPADLRPFWFQENLRLTRAQQA  
ATDFR

PrL3

MAVIFSSSALDSHTHVDKHLVRRPIRDLENNVDMLDHLSRVLTLSYQYHALGTAIALFACACAYALVAPRQPPKFP  
PQLYDETGPIDLIALDKTIREGFQNYKGYFTLKEAHGETVILPTKFMEELKALPDNMLNLDDEIDERFLSEHSLFTTTS  
VGGRISTVVNSVKNELTKTLGHLMDIHEEVVVSFQELIPPCDDWTEIDIQSKLVRIVALVSGRIFVGLPMSRNQEYL  
DCIIEFTLNFFAVPEIRAYPRLLRWTSRYLNTKVRVHKS LATMRRLMAPIIAGTKQQLMGTPHNMC AAWNKN  
SNQKERDSLNIQAQMQLATSMAAIHTTSMTVTNAIFDLAARPEYLQPLRDELQDLRATEPLPYLNKSSMPKLRKLD  
FLKESHRLSPISLLNMRKIVQPITLHDGTVLQPGMHIAFPLHQVSNDEDLWENPSQFDGFRFQKLRDLPGNESKYQ  
FTATGTNNLDFGYGVHACPRFFAANEIKMILVHLIDNDFKFKGDIGRPSLWTPGGYHPDPSVRVLLKRRLLKA

PrL4

MNASKLPLGSFVGTLLLLFILYKLVKLAYVVGQAKKTGLPYTLVPVLETEFLGKLLTPLRPLFTSRLSRGEGWPRWIRFS  
ILDWAWEEKRRVHEELGDVFLVSPGLICYTADADMCDVMNRRNEFLKPRDKYKVPYGPVATTEGKAYNF  
HVRITAPPFNDGSGANDLVWNEASDQARALMESWSQENTTRDLSLDINRLTLAVISYTGFGKRLDFETEVSDLRNKI  
PPGYKMSLHHALHLVTTFMVKILLIPKWIMKMTSMKEIAIAHGELEKYMREMIRTETAKLSKDSEYQSADAKGNLLT  
SVLRASAFEAKAAGRKQAFSEDEVGNLFLYLLAGYETTANAMTYGFITLALRQDLQDRIIQEVDGVYAEAAAEGRTS  
LNYTDDFEKFQYTYGFMYEVRFLYPGVCIITKMVPKDTTITVYPENNSPQQHVLPACRVLNNAVHYHERYWP  
PWALKPDRWMGTIGVTPNSRPNKKVVAQDKSRQVRGTLMTFSGGARACLGRKFTQSEYISVLATVVGKYRIVLGE  
GMDAKVVKQEIHLAAGTVTLAPLKVYKLLAKKRTDVKTG

PrL7

MTISIPGLLFVYDQPPHSIYVLPFVISAAAALCYFIGLIVFNLWFHPLARFPGPLLARSTLLWRMRMTLKGRIHRSIEAG  
HQKYGPVLRVAPNELSFASVSSWKSIVYGHVPGGMIPKSEFYDMYSGGFNSLCIGSERDPEKHRQMKSFLSAAFSTK  
ALLEQEPLVSQTVDAFITRLGNDGGSETKGLDMTKWTEMVAFDILGEMAFGQSFECIRGEPHYWQEMILKHLYFIT  
VADNLRRLPFALTARFLAPVLTAVRNKHSQFTRDKVAERMTNKNLRKDFMSNLISKVESGEVDREEMTAHASTLII  
AGGETVATFLAATVYLLKTPVEYKAMREEIRNRFPTYESINATSAQQLPYLQAVINEGLRIYPPGSQGFPRLSPLAI  
DGEWIPEGTEIYSAWTVTHNPQMFKDPMKFDPNRWLNKSTDIKESSQPFSLGPRGCLGRNFALMELNLILSKLC  
WKYDMELMDQSLDWEGQSKVHMWDKPAALTVRFHSVDGSTLKA

PrL9

MDALEAPELLLLPHLSALTPKTGFLIGLALAITAYCYRHTQHPLYKFPGPSAAWSNVLYCYIIYQGRQPFKLELHN  
QYGSVVRTAPNDLSFN TAGAFRDIYFRPGHETFIKSDWYDGGVFADKAHSIVSEREPGKHGHMRKYL SHAFSDKS  
LKAQEPLIDEVVNEFVSQLDVFGSKKGGIDIVVWFNLATFDIIGSLAFGESFGGVKSGEVHPWISRIITAIGQSALADA  
FKRFPKFATTFKWLFPKAIEKMLEDTAGHENYISLIDKRLSNPSTRPDLTRMLENRPEDLTDVQIAAHASDFVIAGS  
ETTATTLSCIVVYLTKNPSVYQKATQEIRDRFERFEDINSTAASQLKYLHALALEAMRIYPLPLALPRVVPKGGDTIDG  
HFVAEGTIVSVNPVAACLSTKNFDAPLEFRPERWLES DLVDHEASQPFSMGPRACLGRNLAWIELSLLSKMLWV  
YDIELNTEVD

AoL3

MFEGAYTTLGTHSRLLPQVVRAQLNQLPDLVPEIQFKVALQIHREIPFNAITECFKSDWTVINTELMAVLVARV  
SSRMFGGPALSQNREWIEASLRF AHDGFNAQAQKLMWPDTLKFIGQHFIPEVRSIKNTYKIAERAIIPLLDEREVDKS  
KKAHDLLTWMYDQAQGAEKDKKFIAGTLLKVSFAAYHTSAAAPTQLLDIAAMPEHIAPLLGEYLSAPRDNNQNIS  
VKGFAQMVKLD SIMKESQRFNPLLLLTFERIIRDFTLSDGVVIPANTWIGCAAQAIGMDRKLYPDPTDFDAFRFVA  
KEEATATSTSPATKAHYTSANPGSMAFGYGQHACPRFFAMMEIKAIIGEILSRFEMRLADGEMRPPSVTFETQH  
LPHPAGKVLKRRRCT

AoL2

MTLISLSLLALSLWIIIRVLVIYRLAWHPLARFPGPKFAAATSAYEFYFDAIKGGQYTFEIGHMHKKYGPIVRISPHELHI  
NDPGFIEELYPGPGKPRDKYAYATGQFGIPDVCSLVLTYPYDLSSVFGAVSHDLHRMRRGALSPFFSKAAVTKLEPVIYS  
AVDKLISRIEEVESTGFVDLTMAFSCMTTIDIVTQYAFEAESSRFLENPDFTPNFHEAILAGTRMGSWARHFILFPVL  
RSIPIDILSRMSPETGVFLRWQESMRKKVSEIWQDQSAALPVKDKNVSPFGSTIFHELHFHSDMPDSEKHPGRMWQE  
GQIVIGAGTETTAWTLTATFFILDNPNILSKLRKELAAATMPNRYEKPSCRELEALPYLIIIEGLRLSFGVATRLQRINS  
EAPMIFRQKKTNDTIEEKVWEIPTGTPVGMTAALVHLNPELFPDPHEFRPERWLDQDQQLHRGLDKYILSFSRGSR  
QCIGINLAYSELYMGIGILIRRLGDRMQLFETDRTDVMVEDCFVPVPRRESNGVRVRLSAQ

XhR1

MTAKMFDEYGLTLWLEAAPQHWKLSVGFILLIPILTFIITTIISWIGWANNRHRGPREPLNPNYWIPIFFGNWMSFLLA  
RKSFVDRLYRRFGDTPVTVKLGHAKAYLLTKPESYGPILRDTKSCTNKAFVAVIMEQMFGMPKSAMHIYRNDKSGV  
GAIPFPGSTIPAHLRVWHHHYRTATRYLQGDSLRHLSGEVVKHLSDELAKIDPNDPVDSGEWVDVPDFFTWWTHR  
YFAATITALCGPHLIALNPGFVEDFDYLNWPSISKFYPRILAPKAYGARQRILDGIKRWHSARQHSYRHNAGAD  
APAWDEYWGSVWFKVRQRWGQDTGGMNDDALASEDLFVLTAATANAMPMAFWNLIEVYNDPALLGRIQAE  
SNAIVPPDANEDKLPYRFDINAITSSPLLQSVYAEVLRMRVSLFHNRSPQTQGDYSLGPYKFKQGGLVCVSTNIASNHA  
YTWRNRIDGGQRPLDKFWADRFLVSNPKDNNMKFSTDGLDGAWIPYGGGALMCPGRHLAKQEMMSGVAIFD  
AYFDMKLVKGVPRMDDGFFALGAQPPGEPVPMRRKVGISPVGTATTVKHS

## 2. Constructed Vectors

All the plasmids in this study were constructed by yeast recombination and selected in *E. coli*. The sequenced vectors were labelled with ID XX\_ and were used by different combinations for *Aspergillus oryzae* transformations (Table S6). The features of all plasmids are depicted by cartoon maps correspondingly (Figure S2).

**Table S6** Plasmids used in this study

| Construct ID | Plasmids                      | Features                                                                                                     |
|--------------|-------------------------------|--------------------------------------------------------------------------------------------------------------|
| XX01         | pTYGS_arg-hrtc                | HrTc under control of PamyB, <i>argB</i> as the selection marker                                             |
| XX02         | pTYGS_arg-hrtc-hrl4-hrl5-hrl8 | PamyB induces HrTc, Padh induces Hrl4, Pgpda induces Hrl5, Peno induces Hrl8; selection marker is <i>arg</i> |
| XX03         | pTYGS_ade-hrl3-hrl1-hrl7      | PamyB induces Hrl3, Padh induces Hrl1, Pgpda induces Hrl7; selection marker is <i>ade</i>                    |
| XX04         | pTYGS_arg-hrtc-hrl4-hrl8      | PamyB induces HrTc, Padh induces Hrl4, Peno induces Hrl8; selection marker is <i>arg</i>                     |
| XX05         | pTYGS_arg-hrtc-hrl5-hrl8      | PamyB induces HrTc, Pgpda induces Hrl5, Peno induces Hrl8; selection marker is <i>arg</i>                    |
| XX06         | pTYGS_ade-hrl1-hrl7           | Padh induces Hrl1, Pgpda induces Hrl7; selection marker is <i>ade</i>                                        |
| XX07         | pTYGS_ade-hrl3-hrl7           | PamyB induces Hrl3, Pgpda induces Hrl7; selection marker is <i>ade</i>                                       |
| XX08         | pTYGS_arg-hrtc-hrl8           | PamyB induces HrTc, Peno induces Hrl8; selection marker is <i>arg</i>                                        |
| XX09         | pTYGS_ade-prl3-prl4           | Padh induces Prl3, Pgpda induces Prl4; selection marker is <i>ade</i>                                        |
| XX10         | pTYGS_met-prl7-prl9           | Pgpda induces Prl7, Peno induces Prl9; selection marker is <i>met</i>                                        |
| XX11         | pTYGS_ade-prl3                | Padh induces Prl3; selection marker is <i>ade</i>                                                            |
| XX12         | pTYGS_ade-prl4                | Pgpda induces Prl4; selection marker is <i>ade</i>                                                           |
| XX13         | pTYGS_met-prl7                | Pgpda induces Prl7; selection marker is <i>met</i>                                                           |
| XX14         | pTYGS_ade-aol3-aol2           | Padh induces Aol3, Pgpda induces Aol2; selection marker is <i>ade</i>                                        |
| XX15         | pTYGS_ade-xhr1                | Pgpda induces Xhr1; selection marker is <i>ade</i>                                                           |

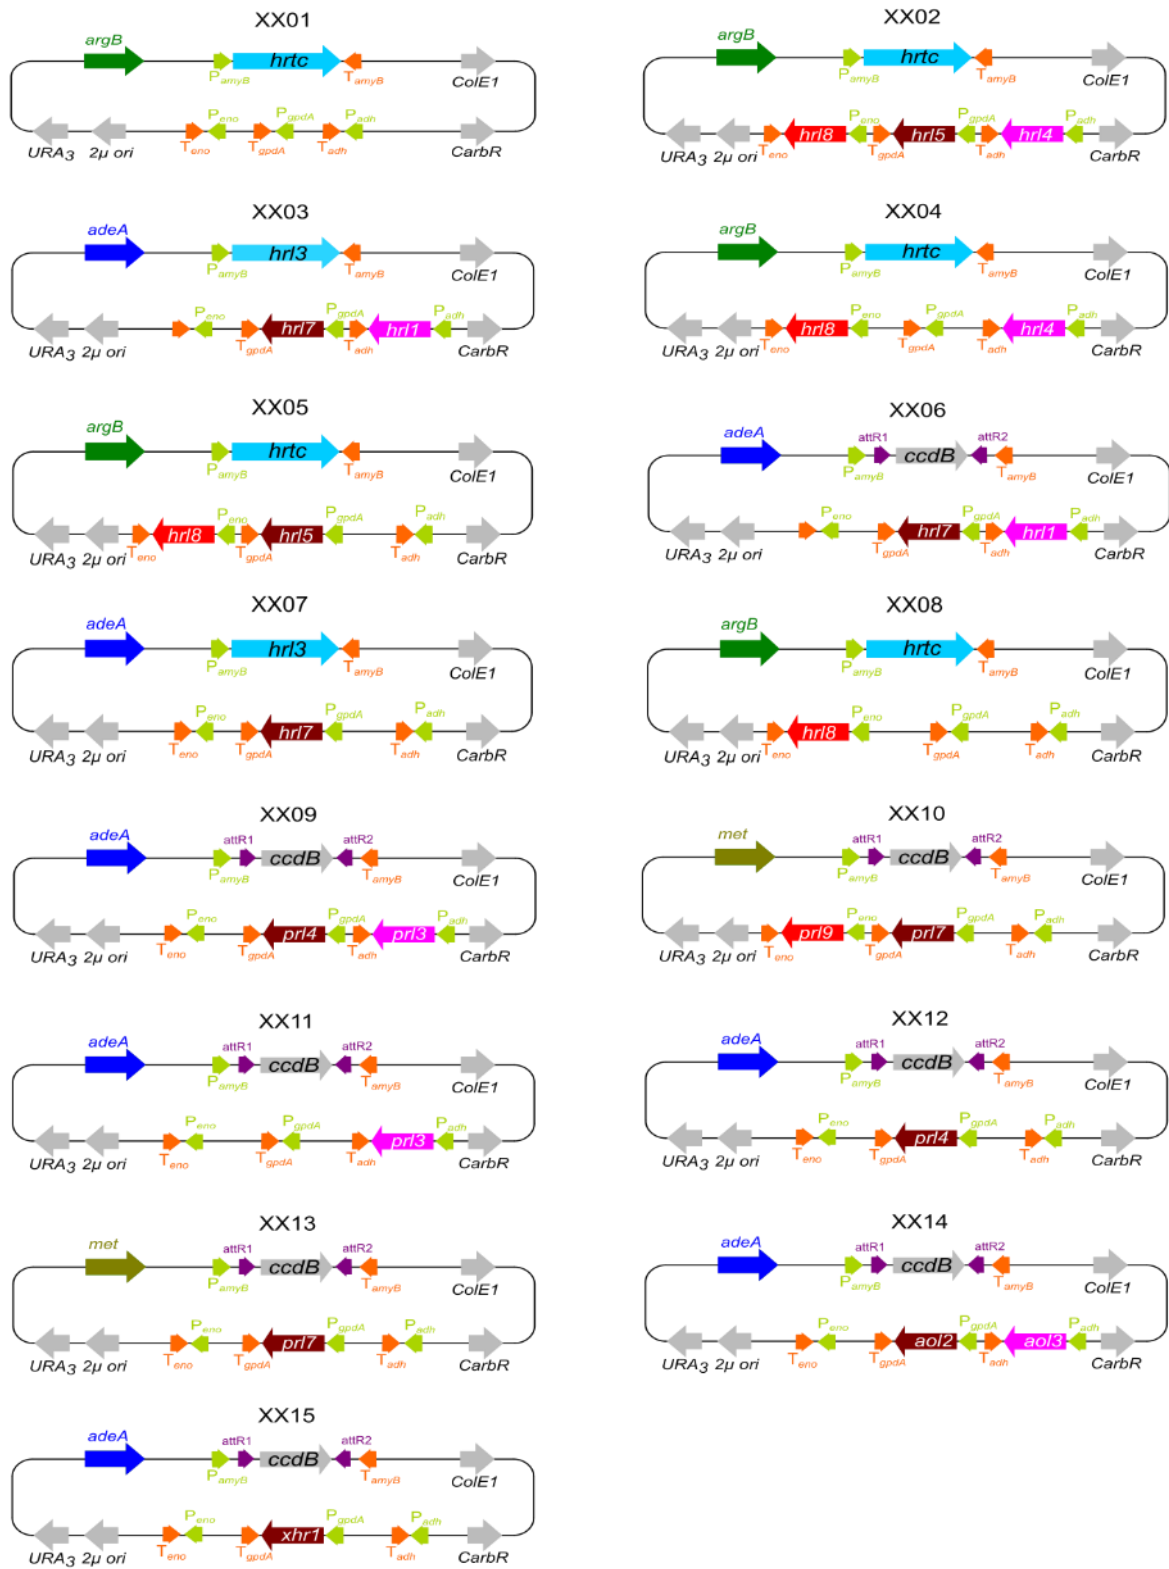

Figure S2 The maps of the plasmids in this study

### 3. Transformation and Selection of *A. oryzae*

#### 3.1 Preparation of Protoplasts

*A. oryzae* NSAR1 was grown on a DPY plate for 5-7 days. Conidia were inoculated into 50 mL GN medium in a 250 mL flask, which was incubated overnight at 28 °C, 110 rpm. The grown mycelia were collected by a sterile Mira-cloth filter and were incubated in 25 mL 0.8 M NaCl solution containing 15 mg/mL lysing enzyme in a 50 mL-Falcon tube on a Stuart SB3 rotator at a speed of 6 for 4 hours, at room temperature. The protoplasts were released from hyphal strands by gentle pipetting with a wide-bore pipette. Afterwards, the supernatant was filtered through a sterile Mira-cloth filter and collected in a new 50 mL-Falcon tube and was centrifuged (5 min, 3000 x g) for collecting protoplasts.

#### 3.2 Transformation and Selection

The resulting supernatant was discarded and the pellet, which is the protoplasts was suspended in 1 mL solution 1 and divided into 10 tubes by 15 ml-Falcon. The plasmids were added into the protoplast solution, for one plasmid, 1 µg of the plasmid was used for one tube; for two plasmids, 3 µg of each plasmid was used for one tube; for three plasmids, 6 µg of each plasmid was used for one tube. 10 µL water was added to one Falcon as a negative control. The empty plasmids were used as a positive control according to the type of selection media. The mixture of protoplast solution and plasmids was incubated on ice for 2 min. Then 1 mL solution 2 was added and the tube was turned upside down several times gently to mix the protoplasts, solutions and plasmids sufficiently. Subsequently, the tubes were incubated for 30 min at 28 °C. Pre-warmed 12 ml CZD/S soft agar was added to each tube and mix thoroughly, then overlaid onto two prepared CZD/S agar plates. Plates were incubated at 28 °C for 4–5 days until colonies appeared. The colonies that emerged were transferred to another CZD/S selection plate for one day. The procedure was repeated by streaking out single colonies on new CZD/S plates. The colonies were then cultivated for 5-7 days on DPY agar. The spores and mycelia were scratched into DPY medium for fermentation. Meanwhile the spores were transferred to make glycerol stocks.

##### **DPY agar/ medium**

2.00 % (w/v) Dextrin from potato starch (Sigma Aldrich) 1.00 % (w/v) Polypeptone (Roth) 0.50 % (w/v) Yeast extract (Duchefa Biochemie) 0.50 % (w/v) Monopotassium phosphate (Roth) 0.05 % (w/v) Magnesium sulfate hexahydrate (Sigma Aldrich).

##### **GN medium**

2.00 % (w/v) D (+)-Glucose Monohydrate (Roth); 1.00 % (w/v) Nutrient broth Nr. 2 from Oxoid (Fisher Scientific).

##### **CZD/S Agar (soft agar was made by 0.80 % (w/v) Agar)**

3.50 % (w/v) Czapek Dox broth (Duchefa Biochemie); 18.22 % (w/v) D-Sorbitol (= 1 M) (Roth); 0.10 % (w/v) Ammonium sulfate (Roth); 0.05 % (w/v) Adenine (Roth); 0.15 % (w/v) L-Methionine (Roth); 1.50 % (w/v) Agar (Duchefa Biochemie).

##### **CZD/S1 Agar (soft agar was made by 0.80 % (w/v) Agar)**

3.50 % (w/v) Czapek Dox broth (Duchefa Biochemie); 18.22 % (w/v) D-Sorbitol (= 1 M); (Roth) 0.10 % (w/v) Ammonium sulfate (Roth); 0.15 % (w/v) L-Methionine (Roth); 1.50 % (w/v) Agar (Duchefa Biochemie).

**CZD/S1 Agar w/o Methionine (soft agar was made by 0.80 % (w/v) Agar)**

3.50 % (w/v) Czapek Dox broth (Duchefa Biochemie); 18.22 % (w/v) D-Sorbitol (= 1 M) (Roth); 0.10 % (w/v) Ammonium sulfate (Roth); 1.50 % (w/v) Agar (Duchefa Biochemie)

**Solution 1:** 0.8 M Sodium chloride, 10mM Calcium chloride, 50 mM Tris-HCl pH 7.5.

**Solution 2:** 60% (w/v) PEG3350, 0.8 M Sodium chloride, 10 mM Calcium chloride, 50 mM Tris-HCl pH 7.5

**Table S7** Combinations of plasmids for each experimental group

| EXP | <i>hrtc</i> | <i>hrl1</i> | <i>hrl3</i> | <i>hrl4</i> | <i>hrl5</i> | <i>hrl7</i> | <i>hrl8</i> | <i>prl3</i> | <i>prl4</i> | <i>prl7</i> | <i>prl9</i> | <i>aol2</i> | <i>aol3</i> | <i>xhr1</i> | Plasmids           |
|-----|-------------|-------------|-------------|-------------|-------------|-------------|-------------|-------------|-------------|-------------|-------------|-------------|-------------|-------------|--------------------|
| 1   | ✓           |             |             |             |             |             |             |             |             |             |             |             |             |             | XX01               |
| 2   | ✓           | ✓           | ✓           | ✓           | ✓           | ✓           | ✓           |             |             |             |             |             |             |             | XX02+XX03          |
| 3   | ✓           | ✓           | ✓           | ✓           |             | ✓           | ✓           |             |             |             |             |             |             |             | XX03+XX04          |
| 4   | ✓           | ✓           | ✓           |             | ✓           | ✓           | ✓           |             |             |             |             |             |             |             | XX03+XX05          |
| 5   | ✓           | ✓           |             | ✓           | ✓           | ✓           | ✓           |             |             |             |             |             |             |             | XX02+XX06          |
| 6   | ✓           |             | ✓           | ✓           | ✓           | ✓           | ✓           |             |             |             |             |             |             |             | XX02+XX07          |
| 7   | ✓           | ✓           | ✓           |             |             | ✓           | ✓           |             |             |             |             |             |             |             | XX03+XX08          |
| 8   | ✓           | ✓           |             |             |             | ✓           | ✓           |             |             |             |             |             |             |             | XX06+XX08          |
| 9   | ✓           |             |             |             |             |             |             | ✓           | ✓           | ✓           | ✓           |             |             |             | XX01+XX9+<br>XX10  |
| 10  | ✓           |             |             |             |             |             |             | ✓           |             |             |             |             |             |             | XX01+XX11          |
| 11  | ✓           |             |             |             |             |             |             |             | ✓           |             |             |             |             |             | XX01+XX12          |
| 12  | ✓           |             |             |             |             |             |             |             | ✓           | ✓           |             |             |             |             | XX01+XX12<br>+XX13 |
| 13  | ✓           |             |             |             |             |             |             |             |             |             |             | ✓           | ✓           |             | XX01+XX14          |
| 14  | ✓           |             |             |             |             |             |             |             |             |             |             |             |             | ✓           | XX01+XX15          |

## 4. Fermentation, Analysis and Compound Purification

### 4.1 Fermentation and Extraction Protocols

Transformants were isolated from DPY agar plates by scraping, and then 1 mL spore suspension was inoculated into 100 mL DPY-medium in a 500 mL baffled flask and incubated at 28 °C with 110 rpm shaking for 5-7 days. A hand blender was used to homogenise the whole culture, and then filtration was used to separate the mixture allowing the chemical to be released into the culture. The pH of the supernatant was adjusted to between 3 and 4 using 2 M hydrochloric acid, and then it was extracted twice with ethyl acetate. After the organic layers were separated, they were dried over MgSO<sub>4</sub>, and the solvent was subsequently removed under decreased pressure. After dissolving the crude extract in methanol to a concentration of 10 mg/mL, the solution was filtered through a glass wool before being tested by LCMS. The concentration of the crude extract employed for the purification process was 50 mg/mL, after transformants were cultivated on a large scale (about 2 litres) for preparative LCMS.

### 4.2 Analytical and Preparative LC-MS

The collection of analytical LCMS data was conducted using a Waters LCMS system, which consisted of a Waters 2767 autosampler, a Waters 2545 pump, a Phenomenex Kinetex column (2.6 μm, C<sub>18</sub>, 100 Å, 4.6 x 100 mm) equipped with a Phenomenex Security Guard precolumn (Luna, C<sub>5</sub>, 300 Å), and with a solvent flow of 1.0 mL·min<sup>-1</sup>. For detection purposes, two instruments were utilised: a Waters ZQ mass detector capable of operating in both ES<sup>+</sup> and ES<sup>-</sup> modes within a mass range of 100 to 1000 *m/z*, and a 996 Diode Array detector with a wavelength range of 210 to 600 nm. In this study, two HPLC solvents were utilised: Acetonitrile (B) with a concentration of 0.045 % formic acid, and water (A) with an additional 0.05 % formic acid.

The purification of all compounds was carried out using a Waters mass-directed autopurification system consisting of a Waters 2767 autosampler, Binary Gradient Module 2545 with 515 HPLC pumps, and System Fluid Organiser. The purification process utilised a Phenomenex Kinetex Axia column (5 μm, C<sub>18</sub>, 100 Å, 21.2 x 250 mm) equipped with a Security Guard pre-column (Luna C<sub>5</sub> 300 Å). The elution of compounds occurred at a flow rate of 20 mL·min<sup>-1</sup> at ambient temperature. The Waters Sample Manager 2767 instrument was employed to acquire fractions through either a mass-directed trigger or a time-dependent trigger. The fractions obtained from the mixture were subjected to vacuum evaporation as a preliminary step to remove the organic solvents. Subsequently, the resulting aqueous phases were dried using a Freeze Dryers and/or rotary evaporator. The dried samples were weighed, dissolved, and subjected to analysis using HPLC prior to being submitted for nuclear magnetic resonance (NMR) analysis.

### 4.3 HRMS and NMR

The HR-ESI-MS studies utilised the Agilent 1200 Infinity Series High Resolution Electrospray Ionization-Mass Spectrometry (MS) instrument. The mass spectrometer utilised in this study was the maXis ESI-TOF instrument from Bruker Daltonics, Agilent Technologies. In the stationary phase, a Waters Acquity UPLC BEH C<sub>18</sub> column (Milford, USA; 2.1 x 50 mm, 1.7 μm) was employed. The ultraviolet/visible spectra were recorded within the wavelength range of 200 to 600 nm. The NMR data were obtained by utilising three different apparatus: the Bruker Ascend 400, the Bruker Ultrashield 500, and the Bruker Ascend 600. The selection of apparatus was based on the weight of the compounds. Each apparatus was equipped with a cryo-cooled probe that operated at frequencies of 400/500/600 MHz (<sup>1</sup>H) and 100/125/150 MHz (<sup>13</sup>C), respectively.



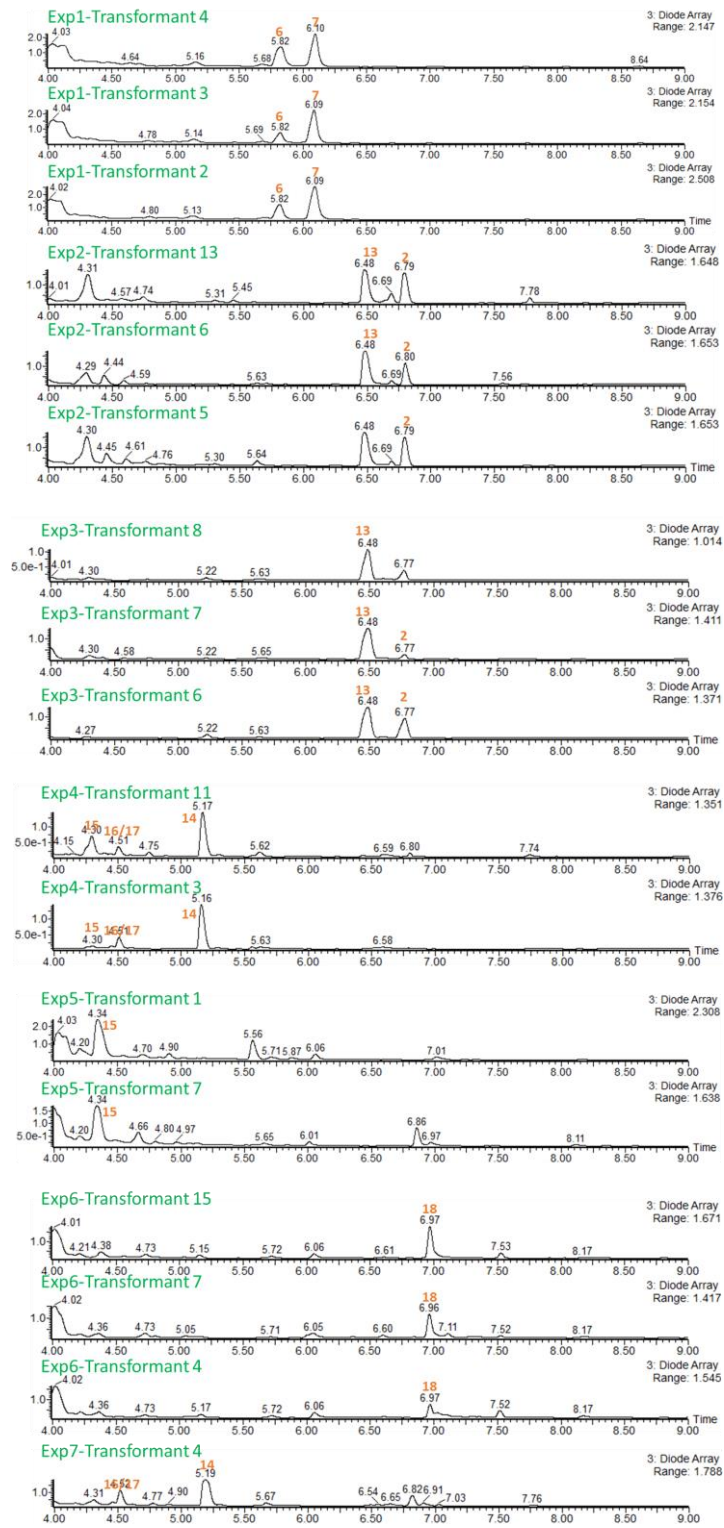

Figure S3 Chromatograms (DAD) of some transformants for each experiment.

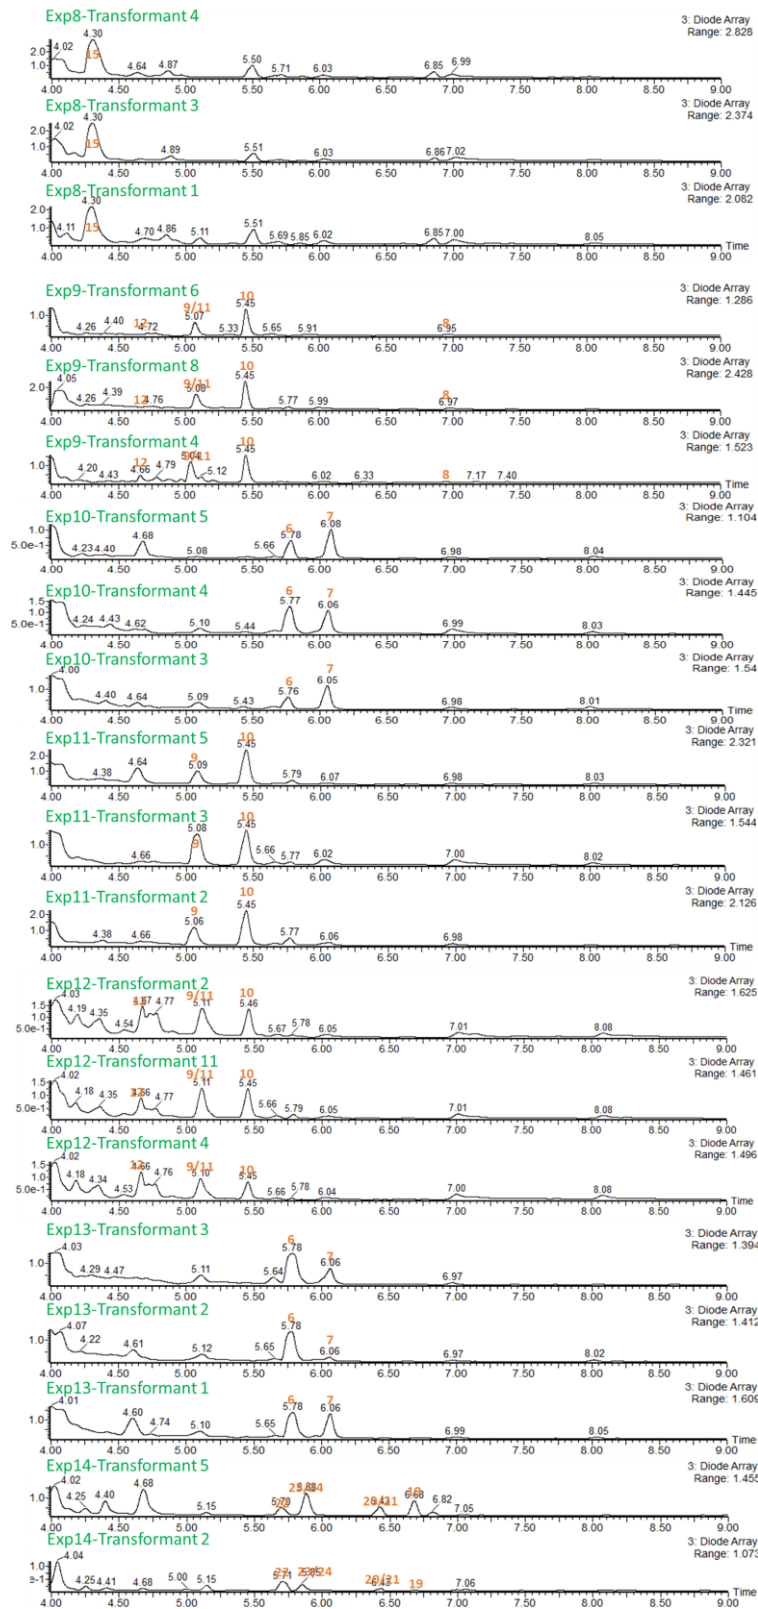

Figure S4 Chromatograms (DAD) of some transformants for each experiment.

## 5. Compound Characterization

| Compounds    | Titres (mg/L) | $[\alpha]^{20}_D$                                                                                                                                     |
|--------------|---------------|-------------------------------------------------------------------------------------------------------------------------------------------------------|
| <b>2</b>     | 8.5           | +18.5 ( $c = 0.200$ , CH <sub>3</sub> OH);<br>$[\alpha]^{25}_D +42$ ( $c = 1.6$ , CH <sub>3</sub> OH) from the literature <sup>3</sup>                |
| <b>6</b>     | 5.0           | -26.4 ( $c = 0.140$ , CH <sub>3</sub> OH)                                                                                                             |
| <b>7</b>     | 7.2           | +48.3 ( $c = 0.180$ , CH <sub>3</sub> OH);<br>$[\alpha]^{25}_D +120$ ( $c = 0.2$ , CH <sub>2</sub> Cl <sub>2</sub> ) from the literature <sup>4</sup> |
| <b>8</b>     | 4.2           | +29.0 ( $c = 0.380$ , CH <sub>3</sub> OH)                                                                                                             |
| <b>9</b>     | 6.0           | -27.0 ( $c = 0.270$ , CH <sub>3</sub> OH)                                                                                                             |
| <b>10</b>    | 4.7           | +60.0 ( $c = 0.240$ , CH <sub>3</sub> OH);<br>$[\alpha]^{20}_D +68$ ( $c = 0.10$ , MeOH) from the literature <sup>4</sup>                             |
| <b>11</b>    | 6.0           | +63.2 ( $c = 0.750$ , CH <sub>3</sub> OH)                                                                                                             |
| <b>12</b>    | 3.5           | +150.6 ( $c = 0.180$ , CH <sub>3</sub> OH)                                                                                                            |
| <b>13</b>    | 15.0          | +30.8 ( $c = 0.400$ , CH <sub>3</sub> OH)                                                                                                             |
| <b>14</b>    | 4.0           | +21.8 ( $c = 0.220$ , CH <sub>3</sub> OH)                                                                                                             |
| <b>15</b>    | 5.0           | +23.6 ( $c = 0.250$ , CH <sub>3</sub> OH)                                                                                                             |
| <b>16/17</b> | 3.0           | -                                                                                                                                                     |
| <b>18</b>    | 5.6           | +43.3 ( $c = 0.150$ , CH <sub>3</sub> OH)                                                                                                             |
| <b>19</b>    | 4.0           | +50.0 ( $c = 0.150$ , CH <sub>3</sub> OH)                                                                                                             |
| <b>20/21</b> | 3.0           | -                                                                                                                                                     |
| <b>22</b>    | 4.0           | +14.0 ( $c = 0.050$ , CH <sub>3</sub> OH)                                                                                                             |
| <b>23/24</b> | 10.0          | -                                                                                                                                                     |

**Table S8** The titres (mg/L) and the  $[\alpha]^{20}_D$  of all the isolated compounds,  $c$  represents the concentration (g/100ml), all the measurements were conducted at 20 °C.

## Compound 2

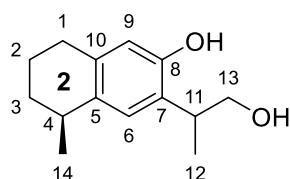

Chemical Formula: C<sub>14</sub>H<sub>20</sub>O<sub>2</sub>

Exact Mass: 220.1463

| Compound 2 |                  |                                        |                                     |                 |                                          |                                                 |
|------------|------------------|----------------------------------------|-------------------------------------|-----------------|------------------------------------------|-------------------------------------------------|
| Pos.       | $\delta_C$ / ppm | $\delta_H$ / ppm (J/Hz)                | <sup>1</sup> H- <sup>1</sup> H COSY | HMBC (H-C)      | $\delta_C$ / ppm literature <sup>3</sup> | $\delta_H$ / ppm (J/Hz) literature <sup>3</sup> |
| 1          | 29.8             | 2.68, 2H, m                            | 2                                   | 2, 3, 5, 9, 10  | 29.7                                     | 2.67, 2H, m                                     |
| 2          | 20.6             | 1.67, 1H, m;                           | 2, 1, 3                             | 1, 3, 4, 10     | 20.5                                     | 1.67, 1H, m;                                    |
|            |                  | 1.85, 1H, m                            | 2, 1, 3                             | 1, 3, 4, 10     |                                          | 1.82, 1H, m                                     |
| 3          | 31.9             | 1.5, 1H, m;                            | 3, 2, 4                             | 1, 2, 4, 5      | 31.8                                     | 1.49, 1H, m;                                    |
|            |                  | 1.88, 1H, m                            | 3, 2, 4                             | 1, 2, 4, 5      |                                          | 1.87, 1H, m                                     |
| 4          | 32.0             | 2.82, 1H, m                            | 3, 14                               | 2, 3, 5, 10, 14 | 31.9                                     | 2.83, 1H, m                                     |
| 5          | 134.4            |                                        |                                     |                 | 134.3                                    |                                                 |
| 6          | 127.6            | 6.93, 1H, s                            |                                     | 4, 8, 10, 11    | 127.3                                    | 6.92, 1H, s                                     |
| 7          | 128.3            |                                        |                                     |                 | 128.2                                    |                                                 |
| 8          | 152.4            |                                        |                                     |                 | 152.4                                    |                                                 |
| 9          | 117              | 6.6, 1H, s                             |                                     | 1, 5, 7, 8      | 116.9                                    | 6.59, 1H, s                                     |
| 10         | 136.7            |                                        |                                     |                 | 136.6                                    |                                                 |
| 11         | 37.1             | 3.19, 1H, pd (7.4, 7.4, 7.3, 7.3, 3.7) | 12, 13                              | 7, 8, 12, 13    | 36.8                                     | 3.19, 1H, dqd (7.8, 7.3, 3.7)                   |
| 12         | 16.0             | 1.32, 3H, d (7.3)                      | 11                                  | 7, 11, 13       | 15.8                                     | 1.30, 3H, d (7.3)                               |
| 13         | 69.6             | 3.73, 1H, dd (9.8, 7.6);               | 11, 13                              | 7, 11, 12       | 69.7                                     | 3.72, 1H, dd (9.8, 7.8);                        |
|            |                  | 3.93, 1H, dd (9.8, 3.8)                | 11, 13                              | 7, 11, 12       |                                          | 3.92, 1H, dd (9.8, 3.7)                         |
| 14         | 23.2             | 1.26, 3H, d (7.0)                      | 4                                   | 3, 4, 5         | 23.1                                     | 1.24, 3H, d (7.9)                               |

**Table S9** Summarized NMR signals for <sup>13</sup>C, <sup>1</sup>H, <sup>1</sup>H-<sup>1</sup>H COSY, HMBC for **2** recorded in CDCl<sub>3</sub>. Literature <sup>3</sup> data was measured in CDCl<sub>3</sub>

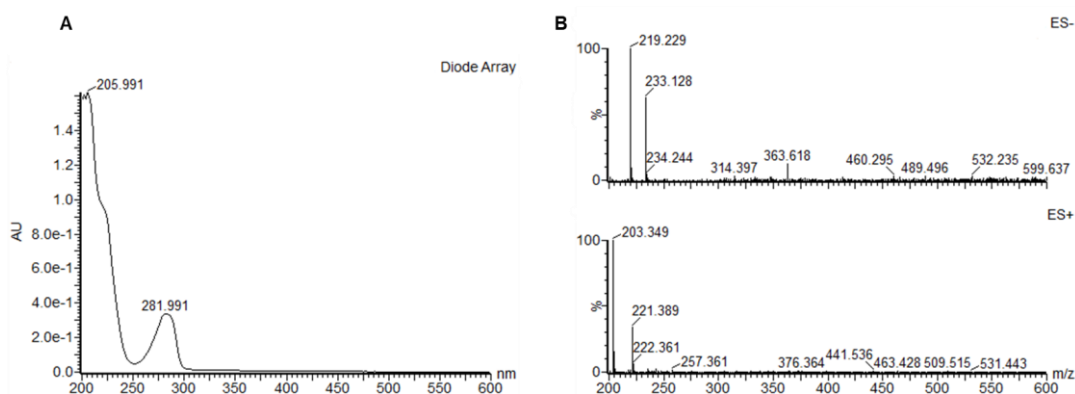

Figure S5 UV-absorption (A) and fragmentation pattern (B) of 2 in ES<sup>-</sup> (top) and ES<sup>+</sup> TIC (bottom) by LR-LCMS

### Elemental Composition Report

Page 1

#### Single Mass Analysis

Tolerance = 20.0 PPM / DBE: min = -1.5, max = 50.0

Element prediction: Off

Number of isotope peaks used for i-FIT = 3

Monoisotopic Mass, Odd and Even Electron Ions

272 formula(e) evaluated with 5 results within limits (up to 30 closest results for each mass)

Elements Used:

C: 0-80 H: 0-110 N: 0-16 O: 0-10

Sun

QToF Premier HAB321

YS 027, neg 745 (7.625) AM (Cen,3, 50.00, Ht,10000.0,554.26,0.70,LS 10)

1: TOF MS ES-  
1.14e+002

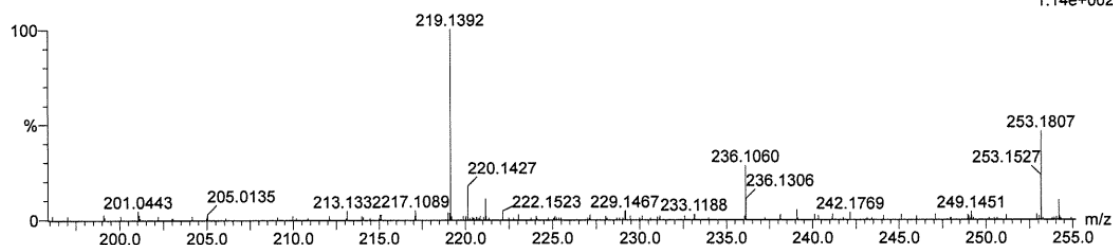

Minimum: -1.5  
Maximum: 5.0 20.0 50.0

| Mass     | Calc. Mass | mDa  | PPM   | DBE | i-FIT | i-FIT (Norm) | Formula      |
|----------|------------|------|-------|-----|-------|--------------|--------------|
| 219.1392 | 219.1385   | 0.7  | 3.2   | 5.5 | 35.1  | 0.5          | C14 H19 O2   |
|          | 219.1372   | 2.0  | 9.1   | 6.0 | 35.9  | 1.4          | C12 H17 N3 O |
|          | 219.1417   | -2.5 | -11.4 | 3.0 | 38.8  | 4.2          | C2 H13 N13   |
|          | 219.1358   | 3.4  | 15.5  | 6.5 | 37.0  | 2.4          | C10 H15 N6   |
|          | 219.1430   | -3.8 | -17.3 | 2.5 | 37.7  | 3.1          | C4 H15 N10 O |

Figure S6 HRMS data for 2;  $m/z$  (M-H)<sup>-</sup> calc. mass is 219.1385, 219.1392 was found.

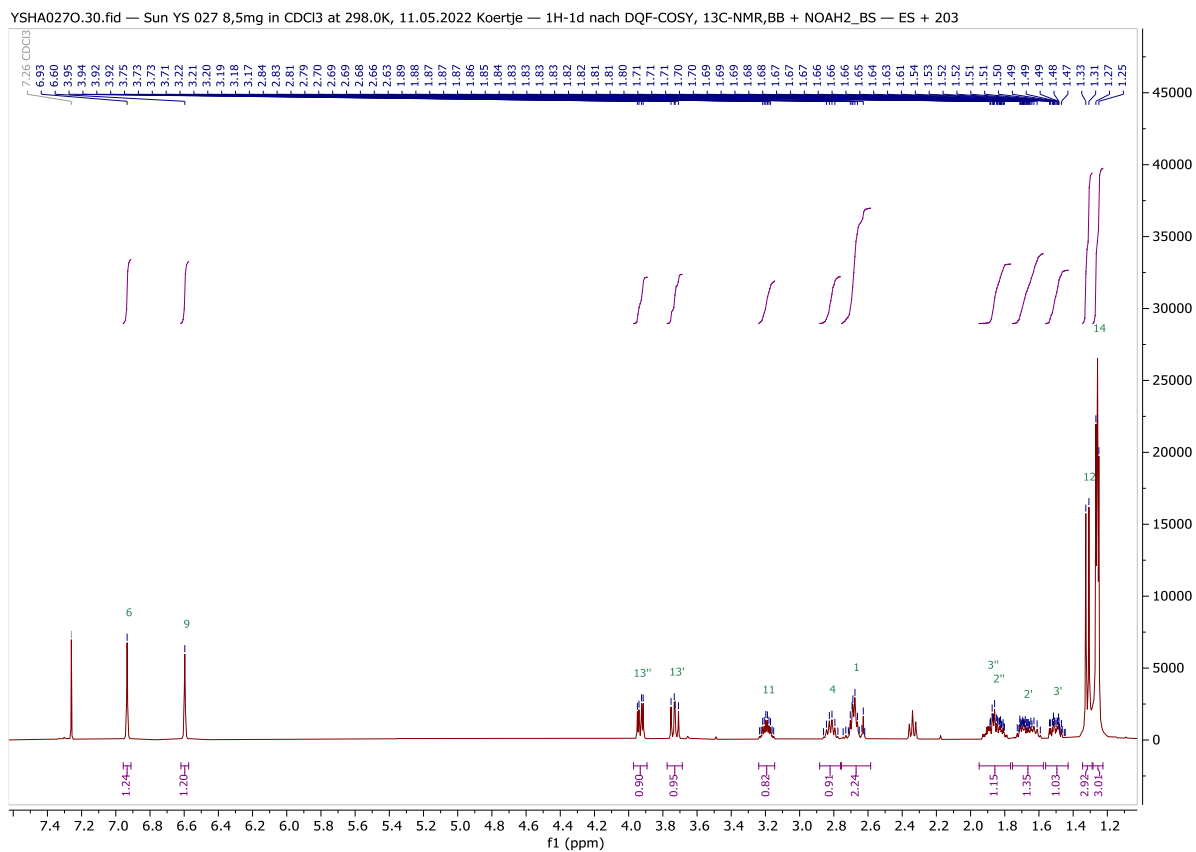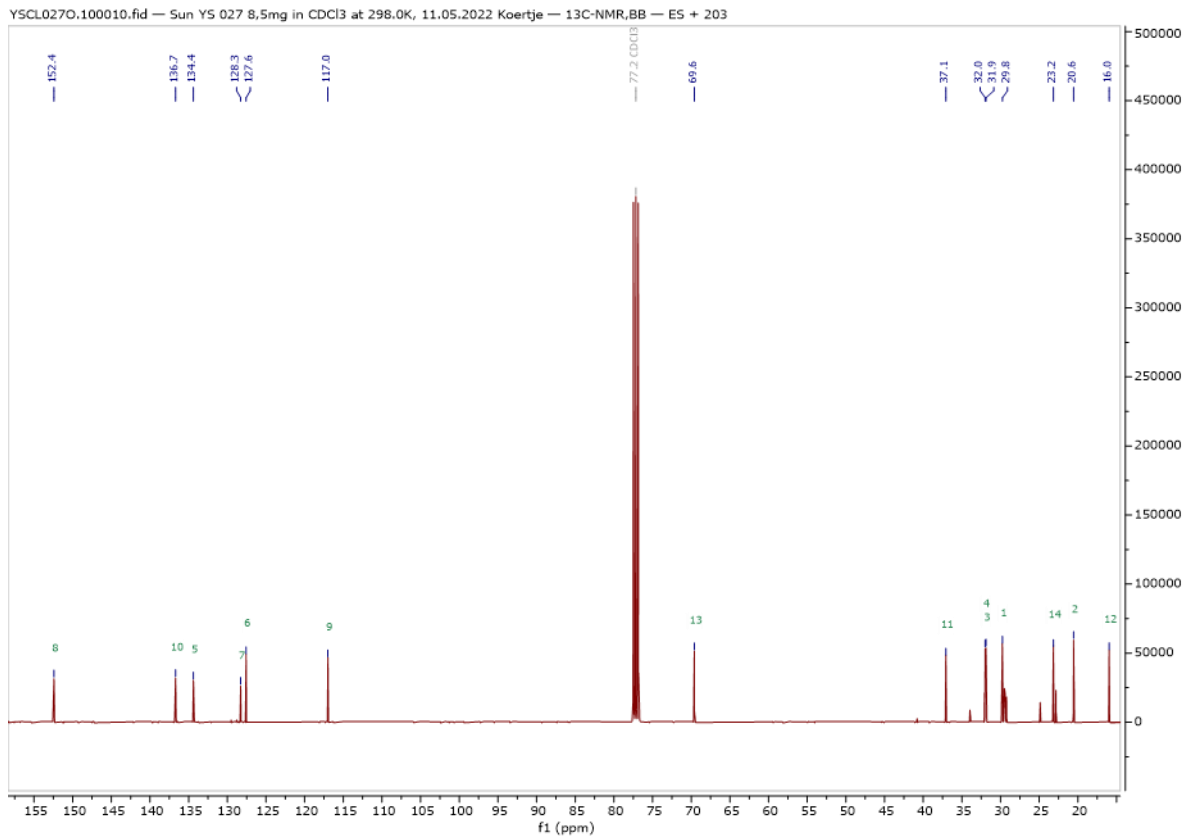

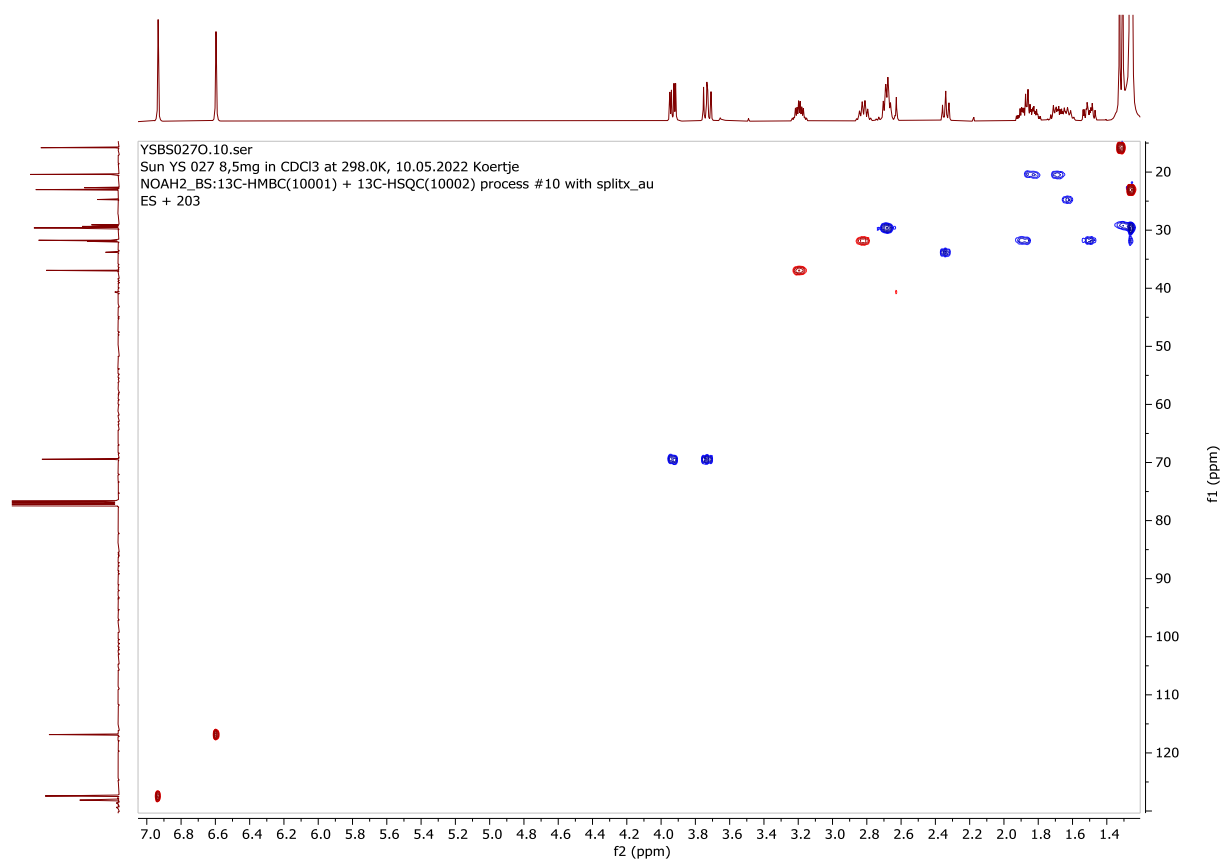

Figure S9 HSQC-spectrum of **2** recorded at 400, 100 MHz in CDCl<sub>3</sub>

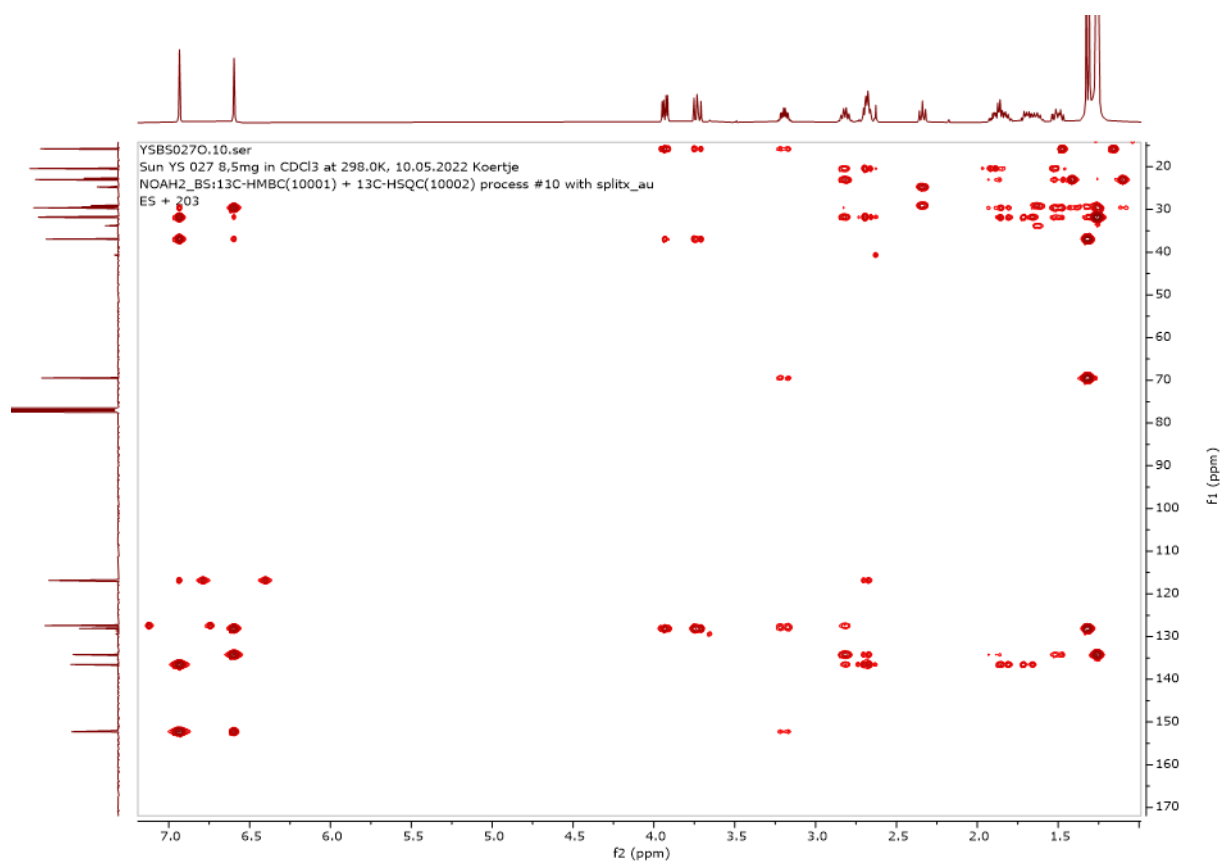

Figure S10 HMBC-spectrum of **2** recorded at 400, 100 MHz in CDCl<sub>3</sub>

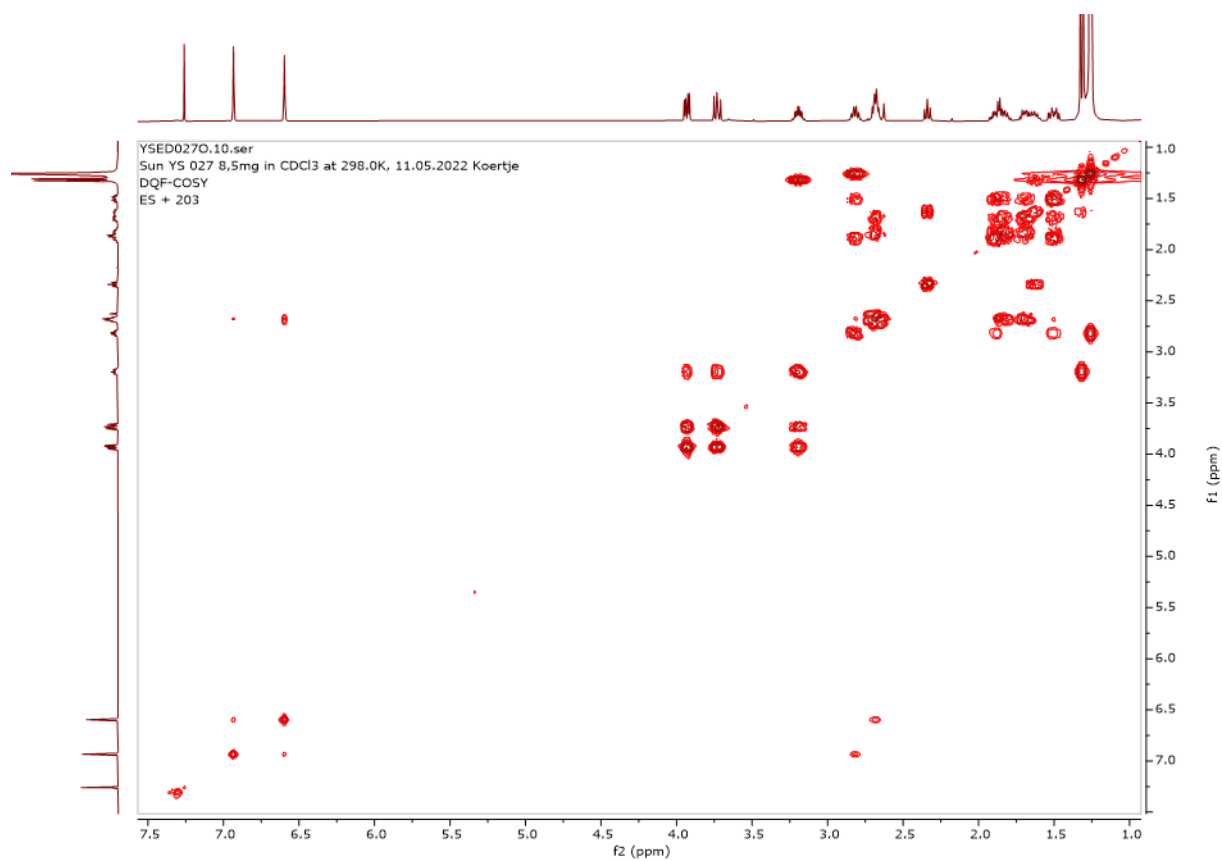

**Figure S11** <sup>1</sup>H, <sup>1</sup>H-COSY-spectrum of **2** recorded at 400 MHz in CDCl<sub>3</sub>



## Compound 5

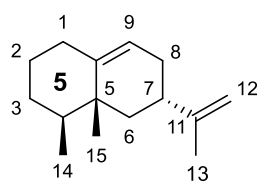

Chemical Formula: C<sub>15</sub>H<sub>24</sub>  
Exact Mass: 204.1878

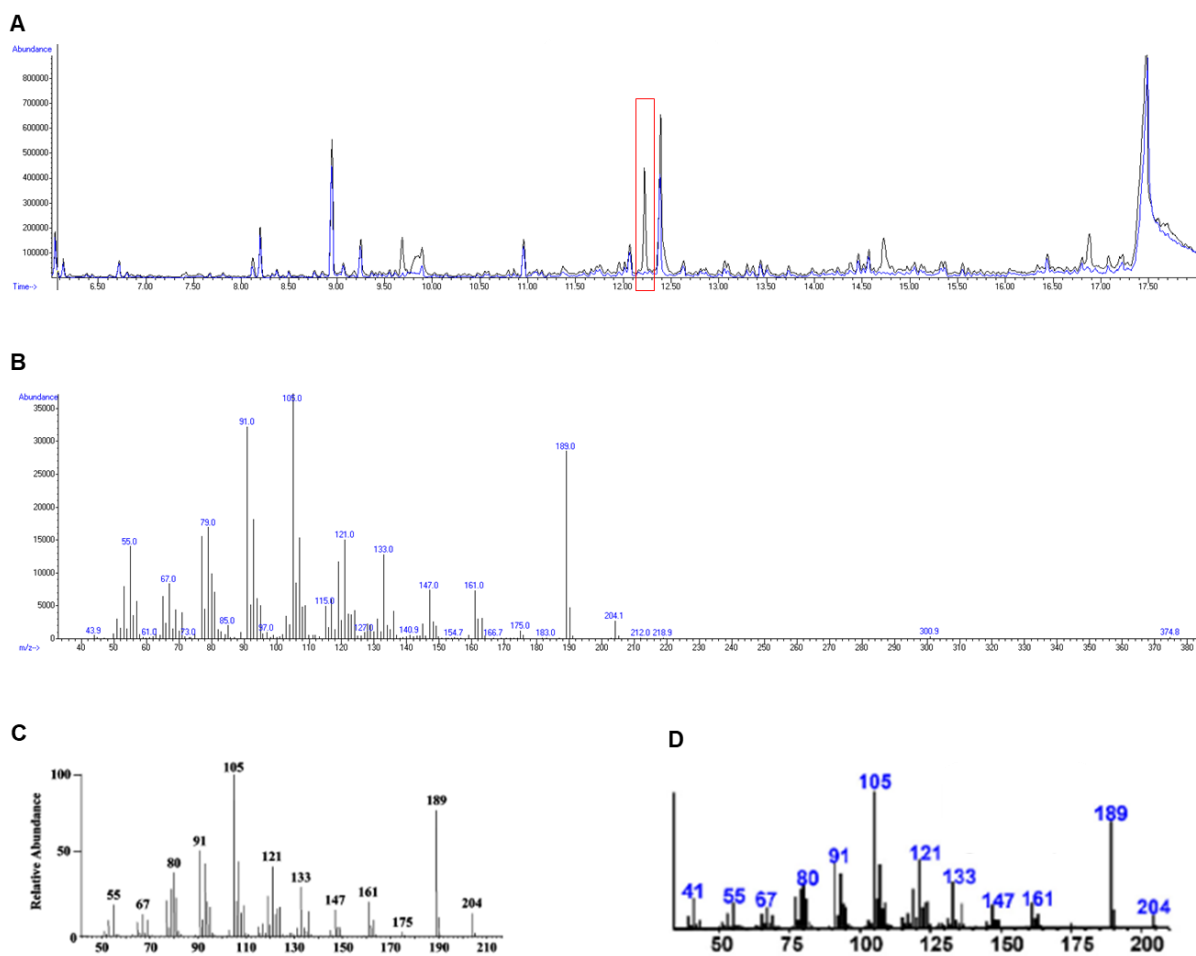

**Figure S12.** Detection of (+)-aristolochene **5** by GC-MS. **(A)** The chromatogram overlay of the control *A. oryzae* NSAR1 (in blue) and the transformant *A. oryzae* NSAR1+ HrTc (in black); the peak of **5** was labelled in a red box. **(B)** Mass information of compound **5**. **(C)** **(D)** Standard spectra of (+)-aristolochene from literature.<sup>5,6</sup>

## Compound 6

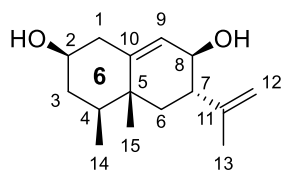

Chemical Formula: C<sub>15</sub>H<sub>24</sub>O<sub>2</sub>  
Exact Mass: 236.1776

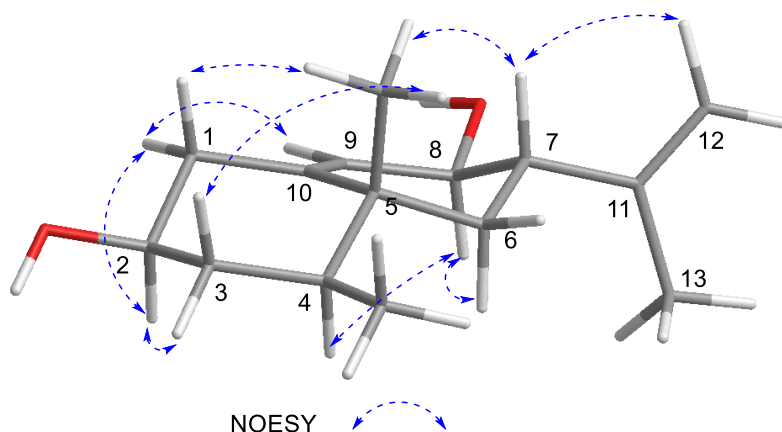

| Compound 6 |                  |                                        |                                     |                  |
|------------|------------------|----------------------------------------|-------------------------------------|------------------|
| Pos.       | $\delta_c$ / ppm | $\delta_H$ / ppm (J/Hz)                | <sup>1</sup> H- <sup>1</sup> H COSY | HMBC (H-C)       |
| 1          | 41.7             | 2.15, 1H, dddd (13.2, 11.4, 2.2, 2.2); | 1, 2, 8, 9                          | 2, 9, 10         |
|            |                  | 2.37, 1H, ddd (12.8, 5.0, 2.3)         | 1, 2, 3                             | 2, 3, 5, 9, 10   |
| 2          | 70.9             | 3.6, 1H, dddd (11.3, 11.3, 4.8, 4.8)   | 1, 3                                |                  |
| 3          | 40.1             | 1.39, 1H, ddd (12.5, 12.3, 10.8);      | 3, 2, 4                             | 2, 4, 5, 14      |
|            |                  | 1.77, 1H, m                            | 3, 2, 1                             | 4                |
| 4          | 41.4             | 1.31, 1H, m                            | 14                                  | 3, 5             |
| 5          | 38.1             |                                        |                                     |                  |
| 6          | 41.0             | 1.26, 1H, m;                           | 6, 7                                | 7, 8, 15         |
|            |                  | 1.67, 1H, dd (13.2, 2.6)               | 6, 7                                | 7, 8, 10, 15     |
| 7          | 47.7             | 2.22, 1H, ddd (12.6, 9.5, 2.6)         | 6, 8                                | 6, 8, 11, 12, 13 |
| 8          | 69.1             | 4.07, 1H, ddd (9.5, 2.2, 2.2)          | 7, 9, 1                             | 9, 10, 11        |
| 9          | 125.1            | 5.42, 1H, dd (1.9, 1.9)                | 1, 8                                | 1, 5, 7          |
| 10         | 143.6            |                                        |                                     |                  |
| 11         | 146.5            |                                        |                                     |                  |
| 12         | 112.7            | 4.89, 1H, m;                           | 12, 13                              | 7, 13            |
|            |                  | 4.91, 1H, m                            | 12, 13                              | 7, 13            |
| 13         | 19.5             | 1.73, 3H, dd (1.1, 1.1)                | 12                                  | 7, 11, 12        |
| 14         | 15.1             | 0.87, 3H, d (6.7)                      | 4                                   | 3, 5             |
| 15         | 17.6             | 1.02, 3H, s                            |                                     | 4, 5, 10         |

Table S10 Summarized NMR signals for <sup>13</sup>C, <sup>1</sup>H, <sup>1</sup>H-<sup>1</sup>H COSY, HMBC for 6 recorded in CDCl<sub>3</sub>

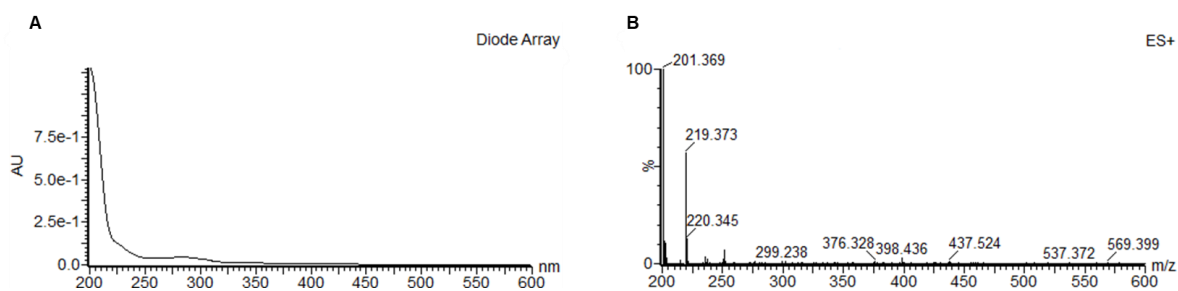

**Figure S13** UV-absorption **(A)** and fragmentation pattern **(B)** of **6** in ES<sup>+</sup> TIC by LR-LCMS

**Elemental Composition Report**

**Single Mass Analysis**

Tolerance = 40.0 PPM / DBE: min = -1.5, max = 50.0  
 Element prediction: Off

Monoisotopic Mass, Odd and Even Electron Ions  
 26 formula(e) evaluated with 1 results within limits (up to 50 closest results for each mass)  
 Elements Used:  
 C: 0-25 H: 0-35 O: 0-4 Br: 0-1

Sun  
 YS 021 2810 (11.715) AM (Cen,5, 60.00, Ar,5000.0,190.00,1.00); Cm (2807:2822)

TOF MS Cl+  
 2.49e+003

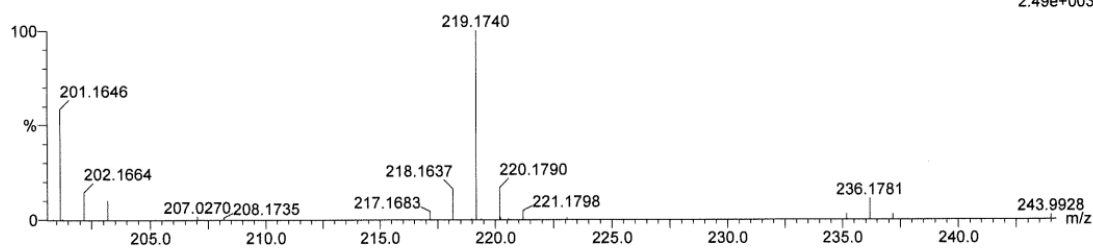

| Mass     | Calc. Mass | mDa | PPM | DBE | i-FIT     | Formula    |
|----------|------------|-----|-----|-----|-----------|------------|
| 236.1781 | 236.1776   | 0.5 | 2.1 | 4.0 | 2773022.3 | C15 H24 O2 |

**Figure S14** HRMS data for **6**. M calc. mass is 236.1776, 236.1781 was found by HR-GCMS

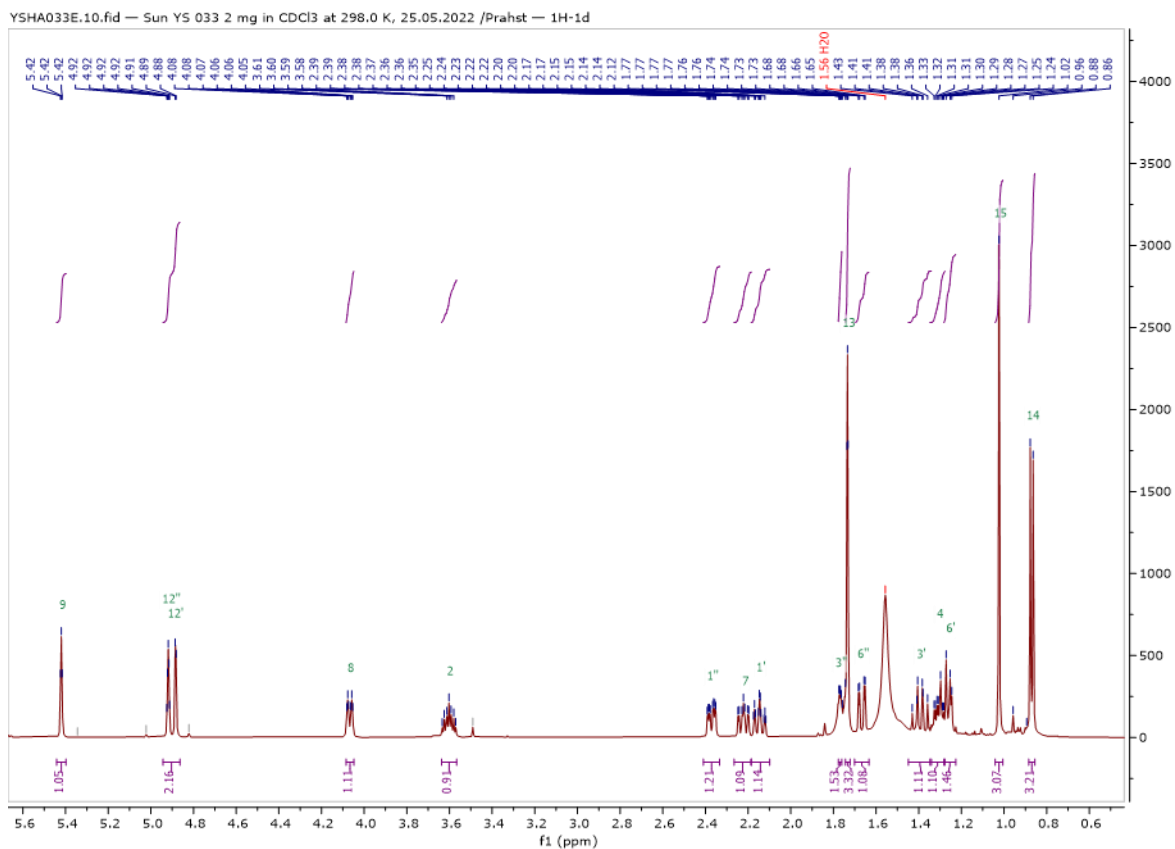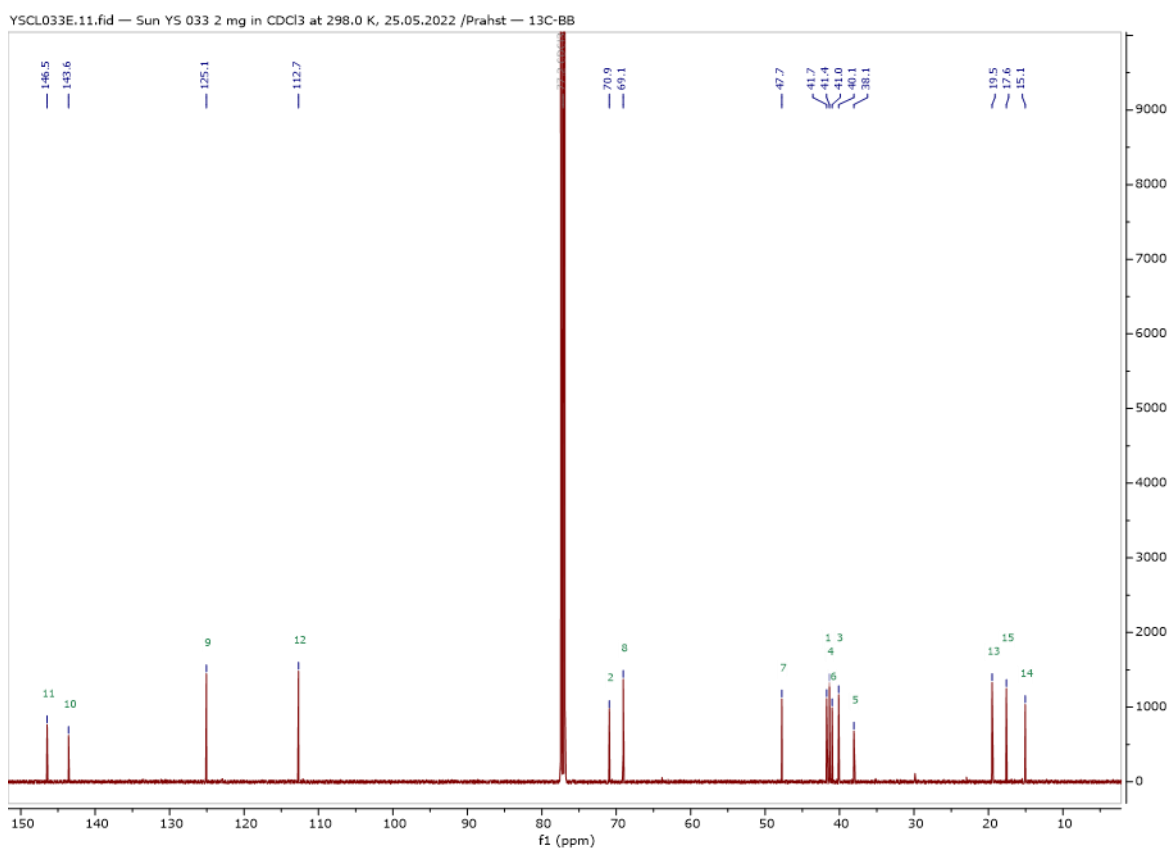

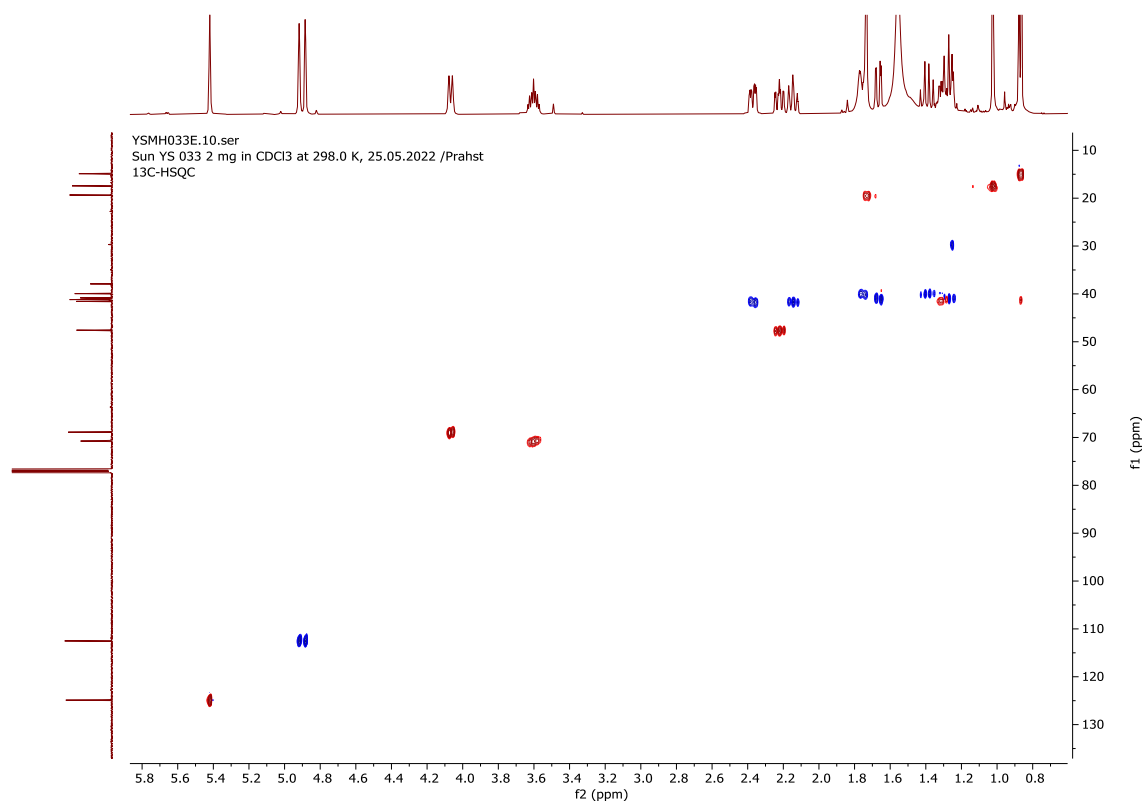

Figure S17 HSQC-spectrum of **6** recorded at 500, 125 MHz in CDCl<sub>3</sub>

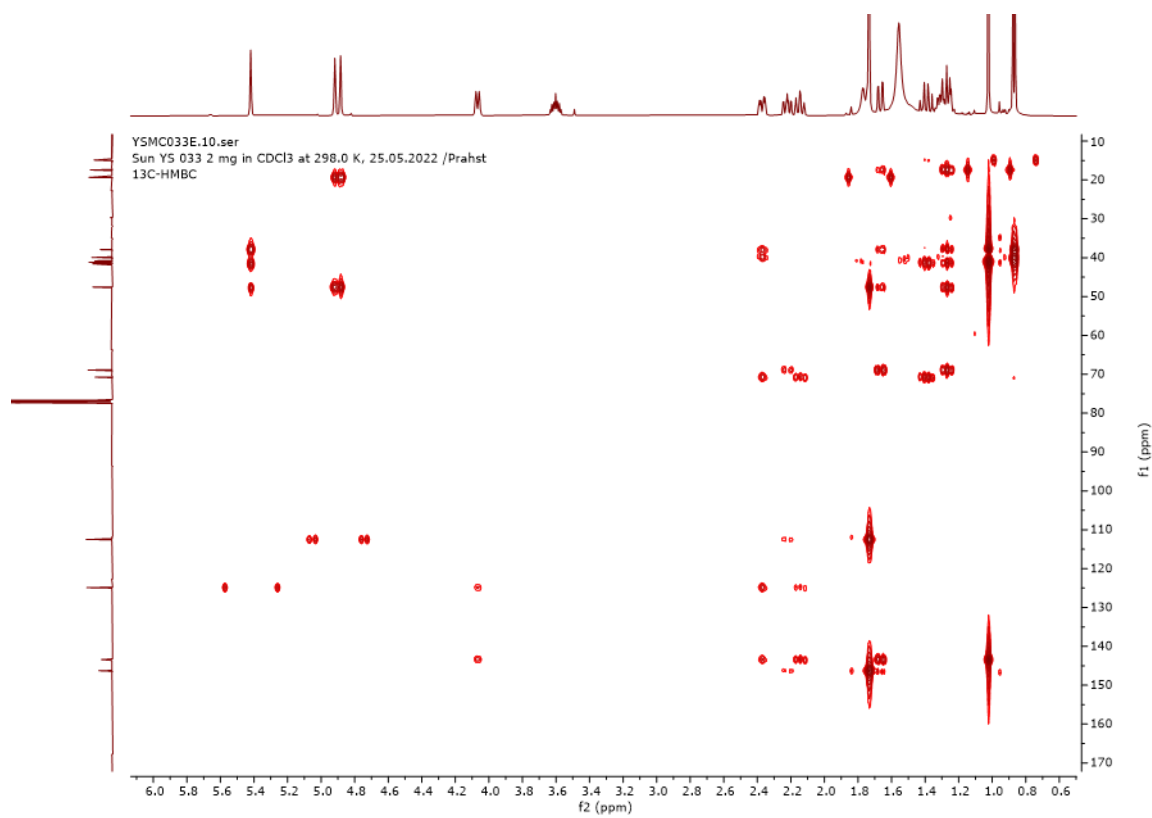

Figure S18 HMBC-spectrum of **6** recorded at 500, 125 MHz in CDCl<sub>3</sub>

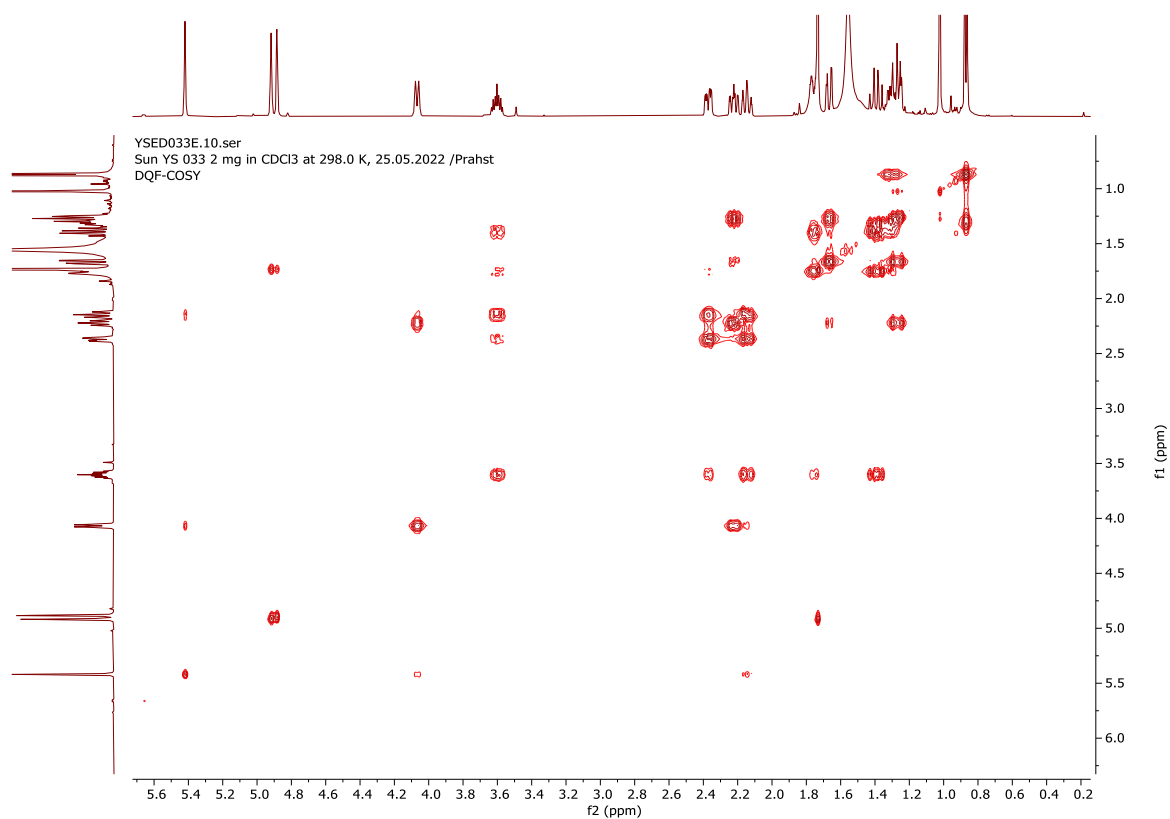

Figure S19 <sup>1</sup>H, <sup>1</sup>H-COSY-spectrum of **6** recorded at 500 MHz in CDCl<sub>3</sub>

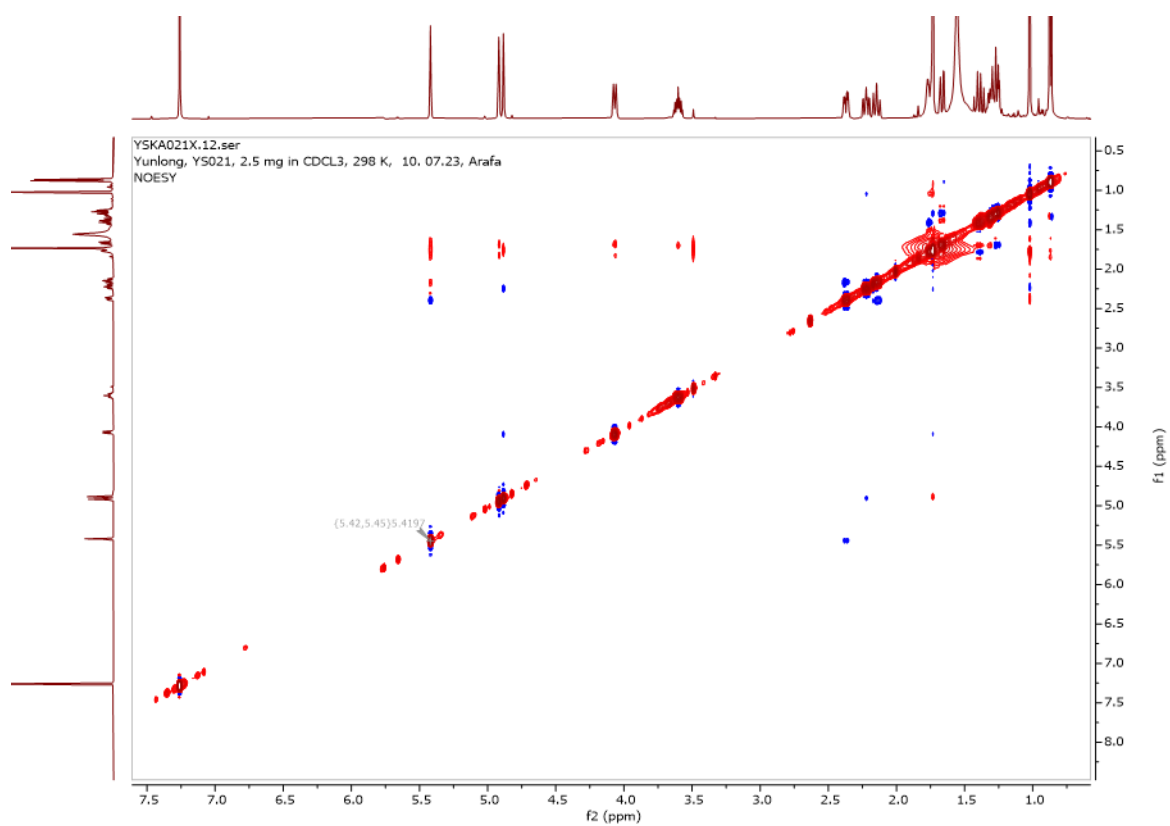

Figure S20 NOESY-spectrum of **6** recorded at 600 MHz in CDCl<sub>3</sub>

## Compound 7

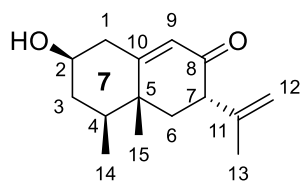

Chemical Formula: C<sub>15</sub>H<sub>22</sub>O<sub>2</sub>  
Exact Mass: 234.1620

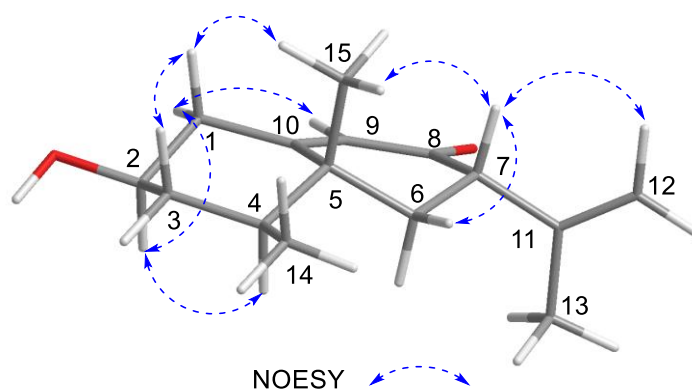

| Compound 7 |                  |                                                                    |                                     |                                |                                          |                                                              |
|------------|------------------|--------------------------------------------------------------------|-------------------------------------|--------------------------------|------------------------------------------|--------------------------------------------------------------|
| Pos.       | $\delta_C$ / ppm | $\delta_H$ / ppm (J/Hz)                                            | <sup>1</sup> H- <sup>1</sup> H COSY | HMBC (H-C)                     | $\delta_C$ / ppm literature <sup>4</sup> | $\delta_H$ / ppm (J/Hz) literature <sup>4</sup>              |
| 1          | 42.2             | 2.33, 1H, ddd (13.6, 11.5, 2.0);<br>2.56, 1H, ddd (13.7, 4.9, 2.4) | 1, 2, 9<br>1, 2, 3                  | 2, 3, 9, 10<br>2, 3, 5, 9, 10  | 42.0                                     | 2.32, 1H, t (12.0);<br>2.57, 1H, dd (4.8, 12.0)              |
| 2          | 69.6             | 3.75, 1H, dddd (11.2, 11.2, 4.7, 4.7)                              | 1, 3                                |                                | 69.3                                     | 3.75, 1H, dddd (4.8, 6.0, 10.0, 12.0)                        |
| 3          | 39.7             | 1.5, 1H, m;<br>1.85, 1H, m                                         | 3, 2, 4,<br>3, 2, 4, 1              | 4<br>4                         | 39.5                                     | 1.56, 1H, dt (10.0, 12.0);<br>2.05, 1H, ddd (4.0, 6.0, 12.0) |
| 4          | 41.4             | 1.5, 1H, m                                                         | 14                                  | 6                              | 40.6                                     | 1.50, 1H, ddq (4.0, 7.0, 12.0)                               |
| 5          | 38.7             |                                                                    |                                     |                                | 38.5                                     |                                                              |
| 6          | 40.8             | 1.8, 1H, m;<br>2.01, dd (13.1, 4.5)                                | 6, 7<br>6, 7                        | 5, 7, 8, 15<br>5, 7, 8, 10, 15 | 41.2                                     | 1.83, 1H, dd (12.0, 14.0);<br>2.00, 1H, dd (4.4, 12.0)       |
| 7          | 51.0             | 3.14, 1H, dd (14.5, 4.5)                                           | 6                                   | 6, 8, 11, 12, 13               | 50.8                                     | 3.15, 1H, dd (4.4, 14.0)                                     |
| 8          | 198.9            |                                                                    |                                     |                                | 198.9                                    |                                                              |
| 9          | 125.9            | 5.79, 1H, d (2.0)                                                  | 1                                   | 1, 5, 7                        | 125.6                                    | 5.77, s                                                      |
| 10         | 166.6            |                                                                    |                                     |                                | 166.7                                    |                                                              |
| 11         | 143.6            |                                                                    |                                     |                                | 143.4                                    |                                                              |
| 12         | 114.5            | 4.82, 1H, m;<br>4.98, 1H, m                                        | 12, 13<br>12, 13                    | 7, 8, 11, 13<br>7, 8, 11, 13   | 114.2                                    | 4.80, 1H, s<br>4.97, 1H, s                                   |
| 13         | 20.2             | 1.74, 3H, m                                                        | 12                                  |                                | 20.0                                     | 1.72, 3H, s                                                  |
| 14         | 15.0             | 0.96, 3H, d (6.2)                                                  | 4                                   | 7, 11, 12                      | 14.7                                     | 0.95, 3H, d (7.0)                                            |
| 15         | 16.1             | 1.16, 3H, s                                                        |                                     | 4, 5, 6, 10                    | 15.9                                     | 1.16, 3H, s                                                  |

**Table S11** Summarized NMR signals for <sup>13</sup>C, <sup>1</sup>H, H-<sup>1</sup>H COSY, HMBC for **7** recorded in CDCl<sub>3</sub>. Literature <sup>4</sup> data was measured in CDCl<sub>3</sub>

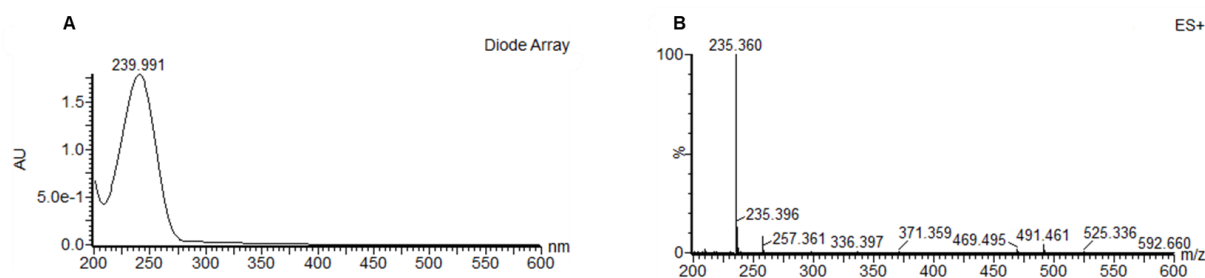

Figure S21 UV-absorption (A) and fragmentation pattern (B) of 7 in ES<sup>+</sup> TIC by LR-LCMS

## Elemental Composition Report

Page 1

### Single Mass Analysis

Tolerance = 20.0 PPM / DBE: min = -1.5, max = 50.0

Element prediction: Off

Number of isotope peaks used for i-FIT = 3

Monoisotopic Mass, Odd and Even Electron Ions

327 formula(e) evaluated with 5 results within limits (up to 30 closest results for each mass)

Elements Used:

C: 0-80 H: 0-110 N: 0-16 O: 0-12

Sun

QToF Premier HAB321

YS 022 925 (9.447) AM (Cen,3, 70.00, Ht,10000.0,556.28,0.70,LS 10)

1: TOF MS ES+  
1.57e+002

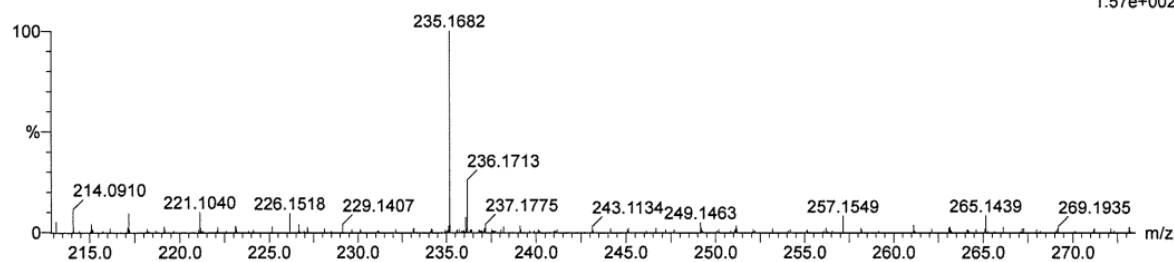

Minimum: -1.5  
Maximum: 5.0 20.0 50.0

| Mass     | Calc. Mass | mDa  | PPM  | DBE | i-FIT | i-FIT (Norm) | Formula       |
|----------|------------|------|------|-----|-------|--------------|---------------|
| 235.1682 | 235.1685   | -0.3 | -1.3 | 5.0 | 53.5  | 1.0          | C13 H21 N3 O  |
|          | 235.1671   | 1.1  | 4.7  | 5.5 | 54.4  | 1.9          | C11 H19 N6    |
|          | 235.1698   | -1.6 | -6.8 | 4.5 | 53.4  | 0.9          | C15 H23 O2    |
|          | 235.1658   | 2.4  | 10.2 | 0.5 | 55.5  | 2.9          | C10 H23 N2 O4 |
|          | 235.1644   | 3.8  | 16.2 | 1.0 | 57.1  | 4.6          | C8 H21 N5 O3  |

Figure S22 HRMS data for 7.  $m/z$  (M+H)<sup>+</sup> calc. mass is 235.1698, 235.1682 was found.



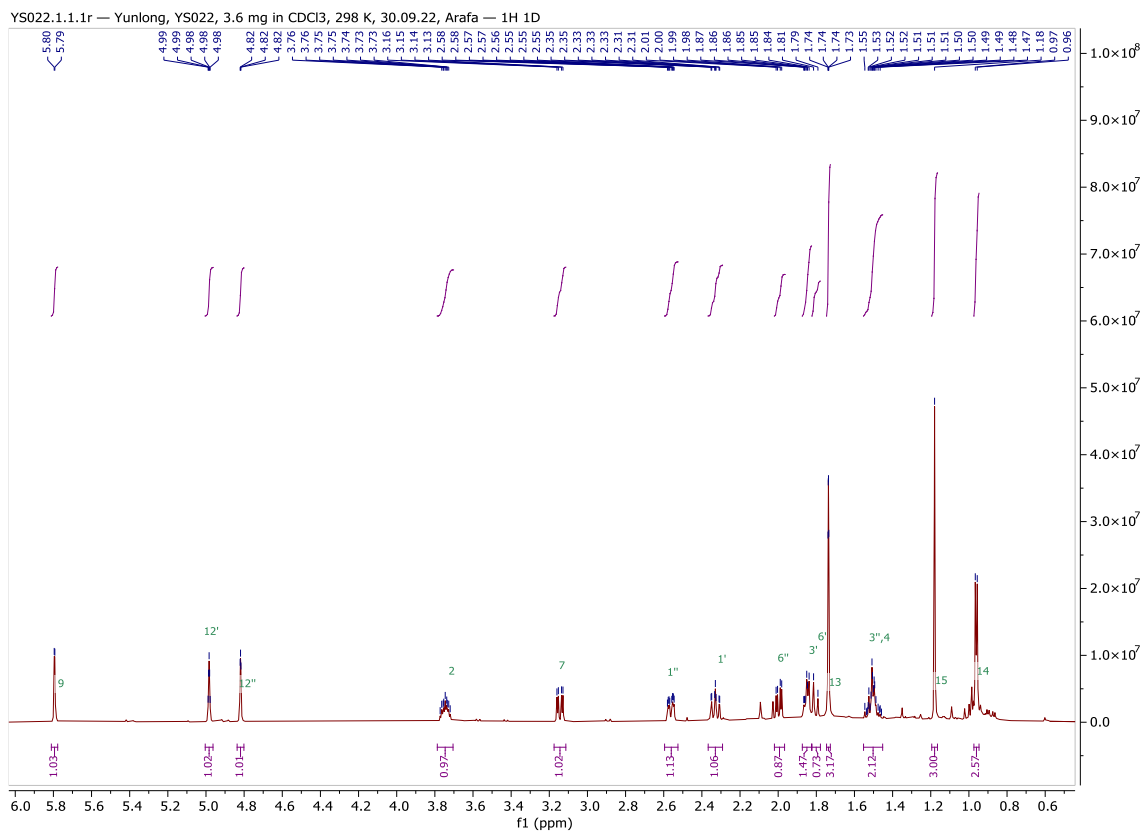

Figure S23 <sup>1</sup>H-NMR of **7** recorded at 600 MHz in CDCl<sub>3</sub>

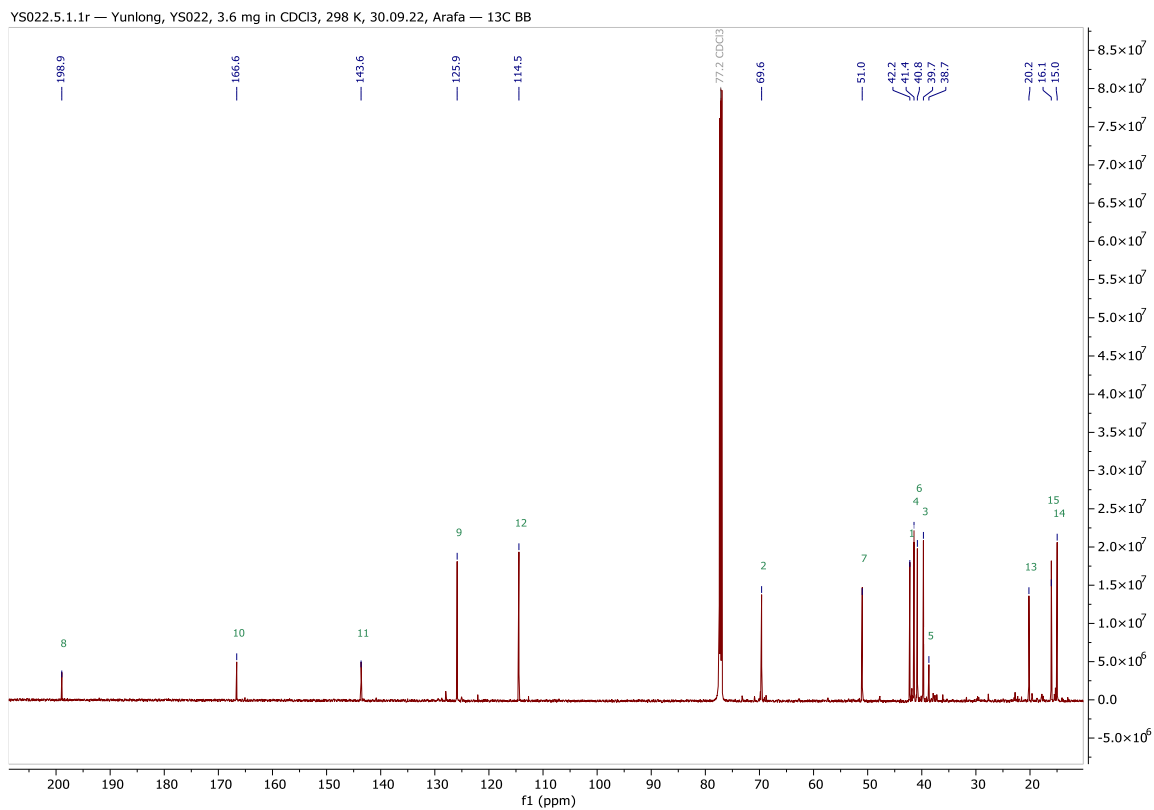

Figure S24 <sup>13</sup>C-NMR of **7** recorded at 150 MHz in CDCl<sub>3</sub>

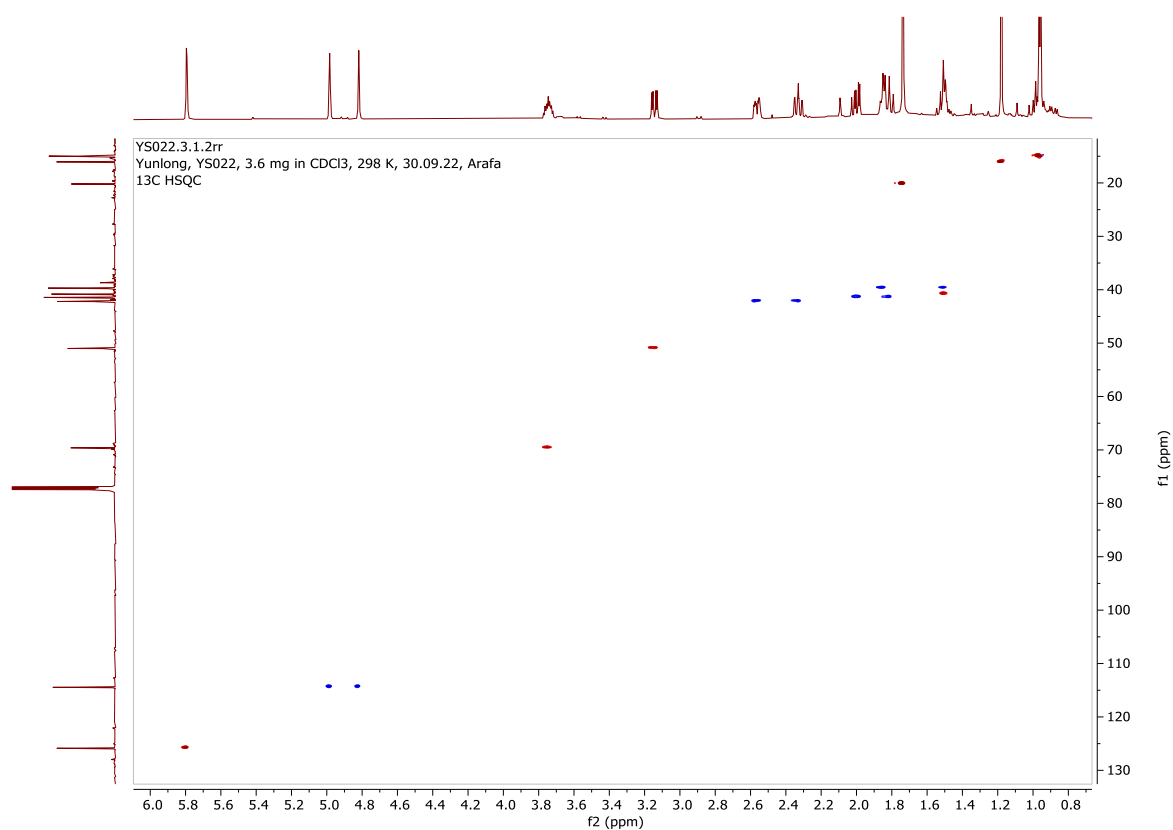

Figure S25 HSQC-spectrum of **7** recorded at 600, 150 MHz in CDCl<sub>3</sub>

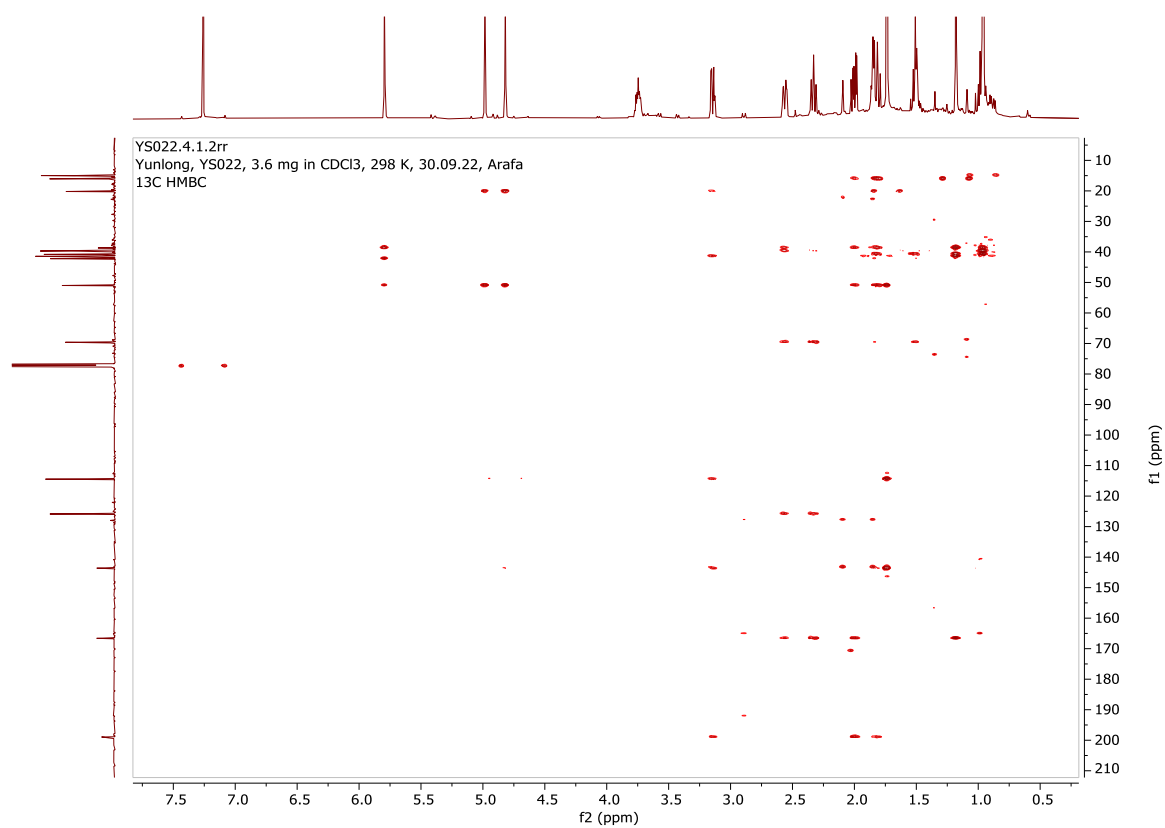

Figure S26 HMBC-spectrum of **7** recorded at 600, 150 MHz in CDCl<sub>3</sub>

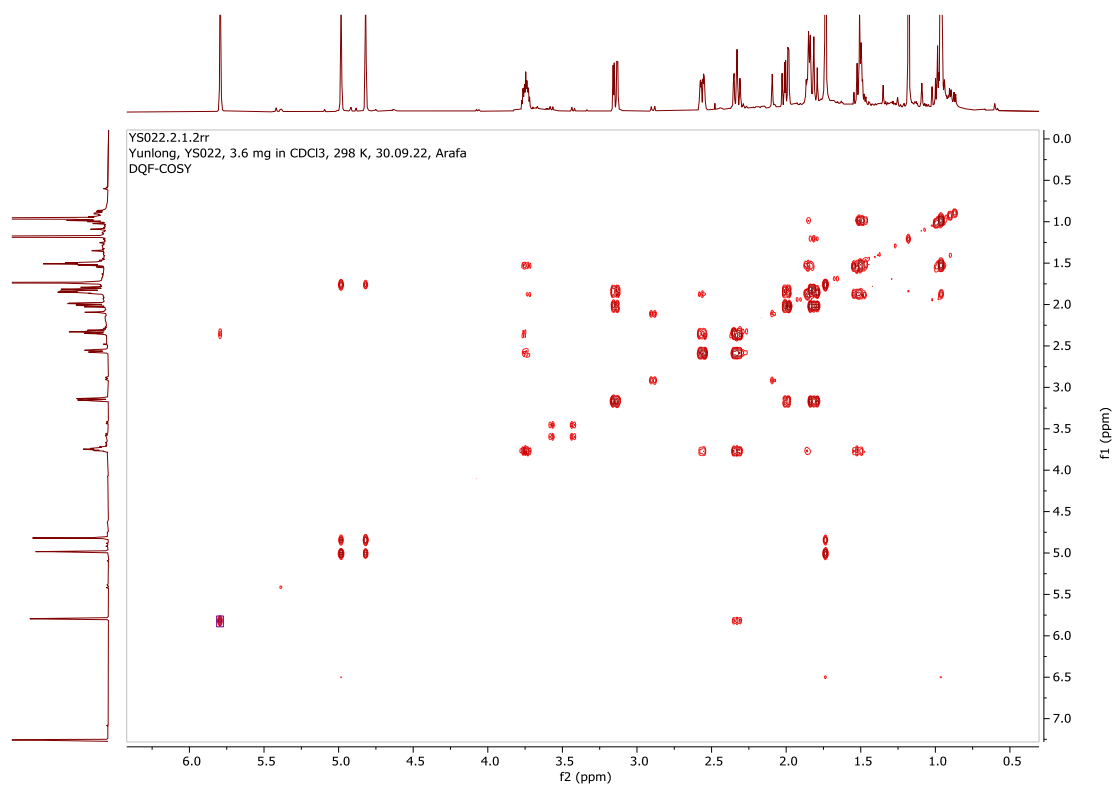

Figure S27 <sup>1</sup>H, <sup>1</sup>H-COSY -spectrum of **7** recorded at 600 MHz in CDCl<sub>3</sub>

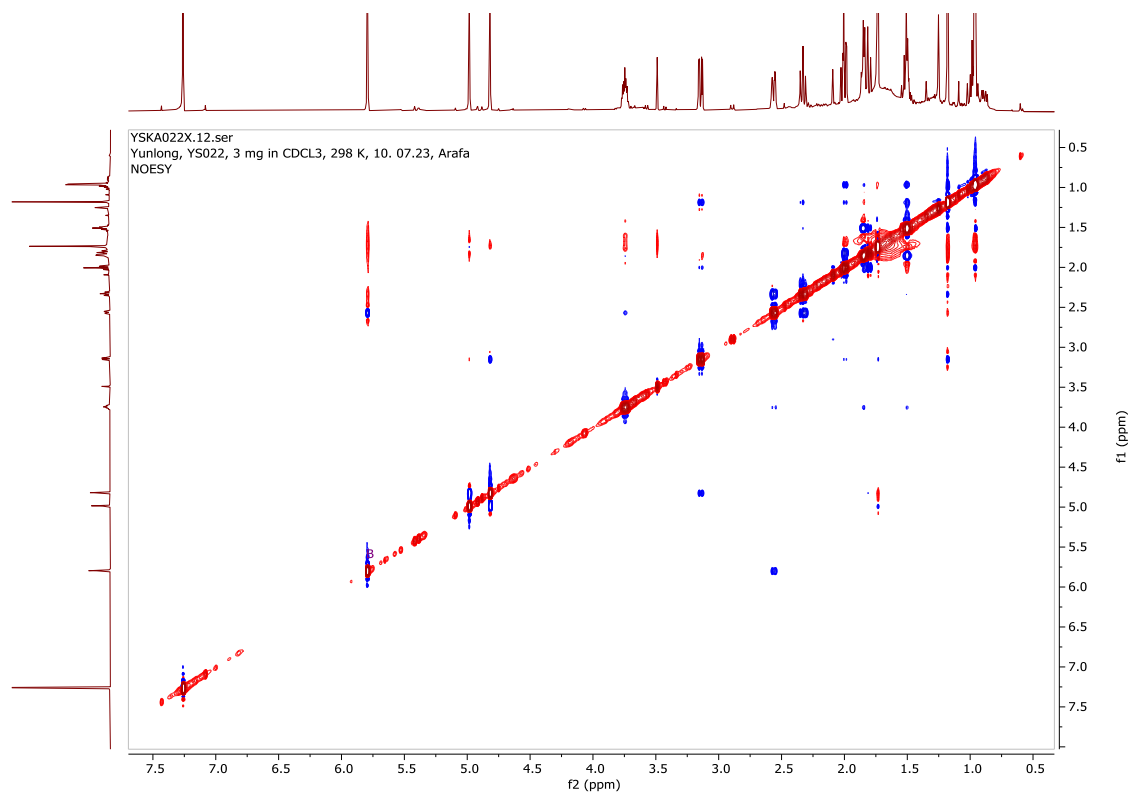

Figure S28 NOESY-spectrum of **7** recorded at 600 MHz in CDCl<sub>3</sub>

## Compound 8

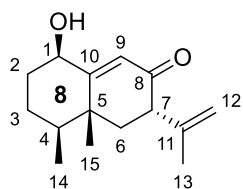

Chemical Formula: C<sub>15</sub>H<sub>22</sub>O<sub>2</sub>  
Exact Mass: 234.1620

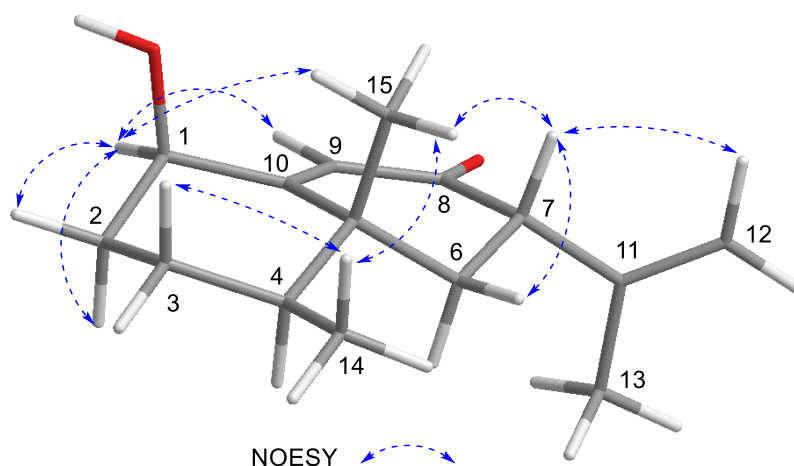

| Compound 8 |                  |                          |                                     |                  |
|------------|------------------|--------------------------|-------------------------------------|------------------|
| Pos.       | $\delta_c$ / ppm | $\delta_H$ / ppm (J/Hz)  | <sup>1</sup> H- <sup>1</sup> H COSY | HMBC (H-C)       |
| 1          | 73.2             | 4.33, 1H, dd (3.0, 3.0)  | 2                                   | 3, 5, 9          |
| 2          | 33.0             | 1.69, 1H, m;             | 2, 1, 3                             | 3, 4             |
|            |                  | 2.01, 1H, m              | 2, 1, 3                             | 1, 3, 4, 10      |
| 3          | 24.9             | 1.41, 1H, m;             | 3, 2, 4                             | 2, 4, 5          |
|            |                  | 1.88, 1H, m              | 3, 2, 4                             | 2, 4, 5          |
| 4          | 43.5             | 1.46, 1H, m              | 3, 14                               | 14               |
| 5          | 39.1             |                          |                                     |                  |
| 6          | 43.1             | 1.89, 1H, m;             | 6, 7                                | 5, 7, 8, 10      |
|            |                  | 1.95, 1H, m              | 6, 7                                | 5, 7, 8, 10      |
| 7          | 51.6             | 3.24, 1H, dd (14.3, 4.6) | 6                                   | 6, 8, 11, 12, 13 |
| 8          | 200.0            |                          |                                     |                  |
| 9          | 126.7            | 5.84, 1H, s              |                                     | 1, 5, 7          |
| 10         | 167.5            |                          |                                     |                  |
| 11         | 143.6            |                          |                                     |                  |
| 12         | 114.5            | 4.82, 1H, m;             | 12, 13                              | 7, 13            |
|            |                  | 4.98, 1H, m              | 12, 13                              | 7, 13            |
| 13         | 20.1             | 1.72, 3H, dd (1.5, 0.8)  | 12                                  | 7, 11, 12        |
| 14         | 15.3             | 0.95, 3H, d (6.8)        | 4                                   | 3, 4, 5          |
| 15         | 18.4             | 1.37, 3H, s              |                                     | 4, 5, 6, 10      |

**Table S12** Summarized NMR signals for <sup>13</sup>C, <sup>1</sup>H, <sup>1</sup>H-<sup>1</sup>H COSY, HMBC for **8** recorded in CDCl<sub>3</sub>

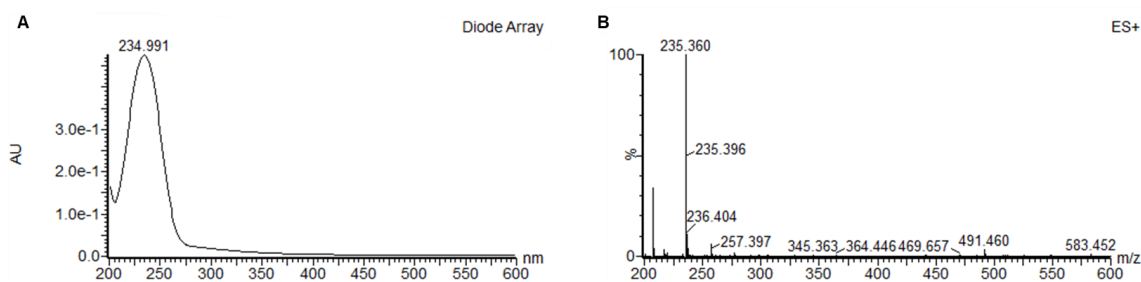

Figure S29 UV-absorption (A) and fragmentation pattern (B) of **8** in ES<sup>+</sup> TIC by LR-LCMS

### Elemental Composition Report

Page 1

#### Single Mass Analysis

Tolerance = 20.0 PPM / DBE: min = -1.5, max = 50.0

Element prediction: Off

Number of isotope peaks used for i-FIT = 3

Monoisotopic Mass, Odd and Even Electron Ions

210 formula(e) evaluated with 3 results within limits (all results (up to 1000) for each mass)

Elements Used:

C: 0-40 H: 0-60 N: 0-5 O: 0-5 Na: 0-1

Sun

QToF Premier HAB321

YS 055 754 (7.712) AM (Cen,4, 70.00, Ht,10000.0,556.28,0.70,LS 10)

1: TOF MS ES+  
1.72e+002

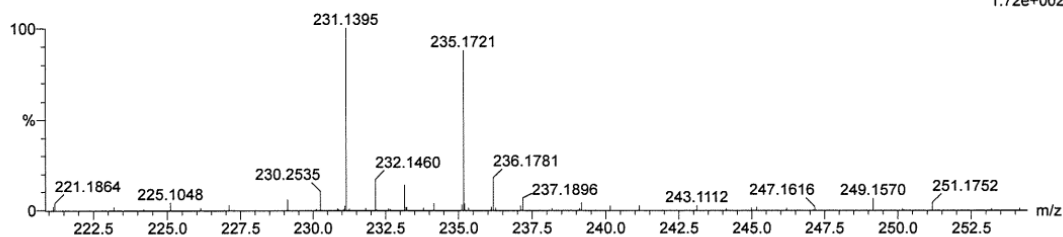

Minimum: -1.5  
Maximum: 5.0 20.0 50.0

| Mass     | Calc. Mass | mDa | PPM  | DBE | i-FIT | i-FIT (Norm) | Formula       |
|----------|------------|-----|------|-----|-------|--------------|---------------|
| 235.1721 | 235.1698   | 2.3 | 9.8  | 4.5 | 23.3  | 0.5          | C15 H23 O2    |
|          | 235.1685   | 3.6 | 15.3 | 5.0 | 24.4  | 1.5          | C13 H21 N3 O  |
|          | 235.1674   | 4.7 | 20.0 | 1.5 | 24.8  | 1.9          | C13 H24 O2 Na |

Figure S30 HRMS data for **8**;  $m/z$  (M+H)<sup>+</sup> calc. mass is 235.1698, 235.1721 was found

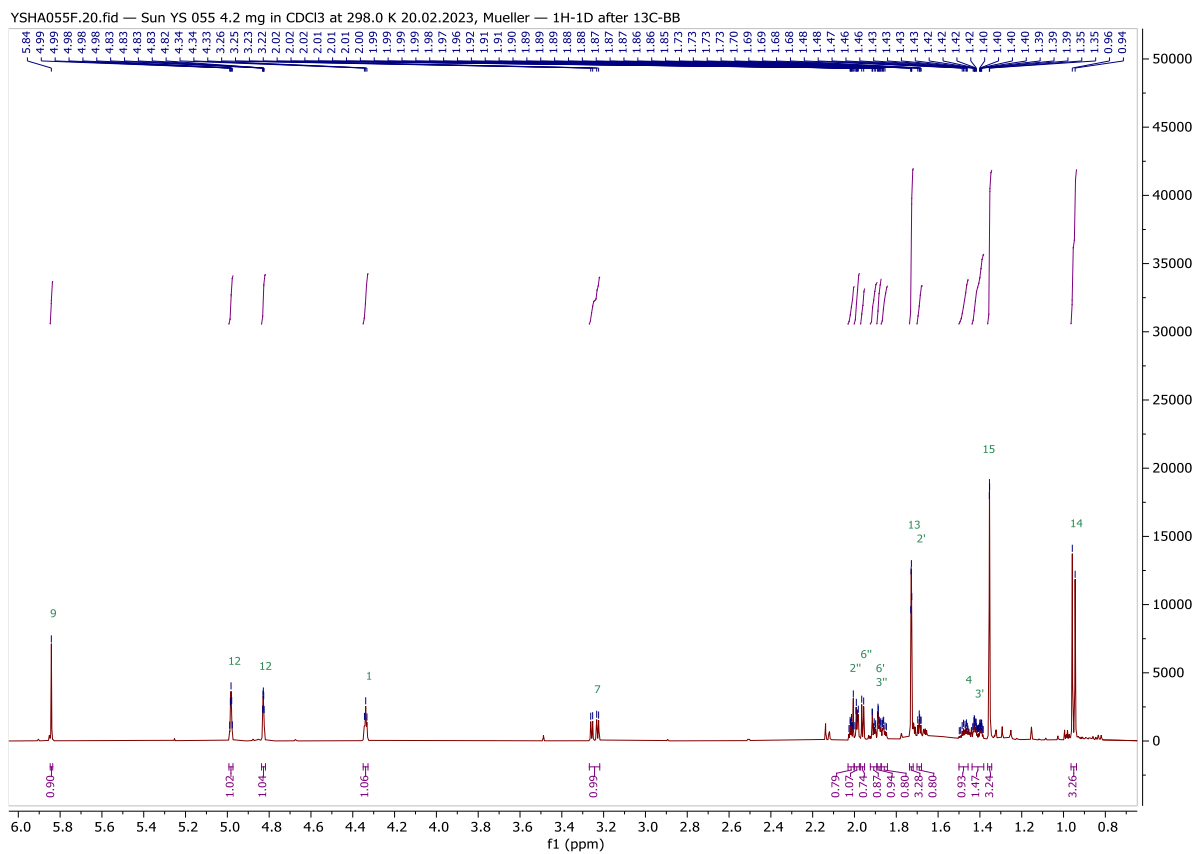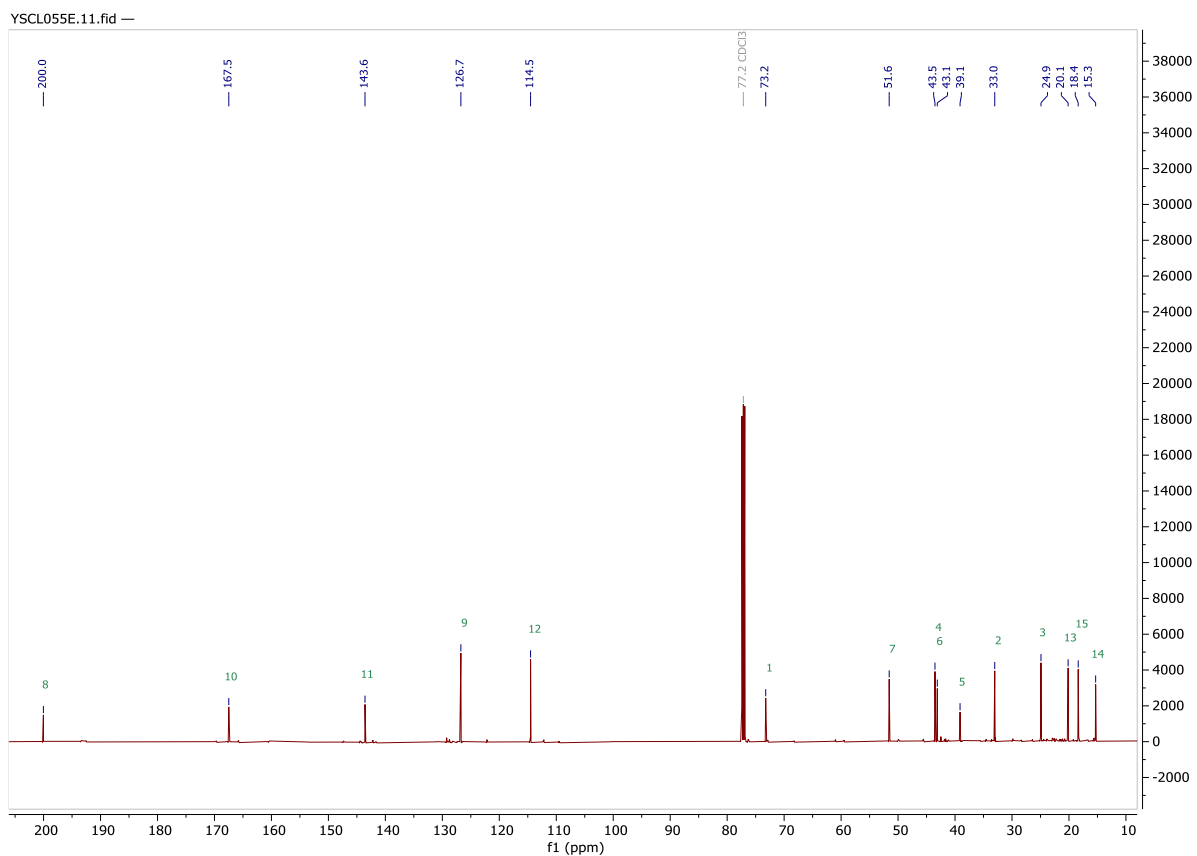

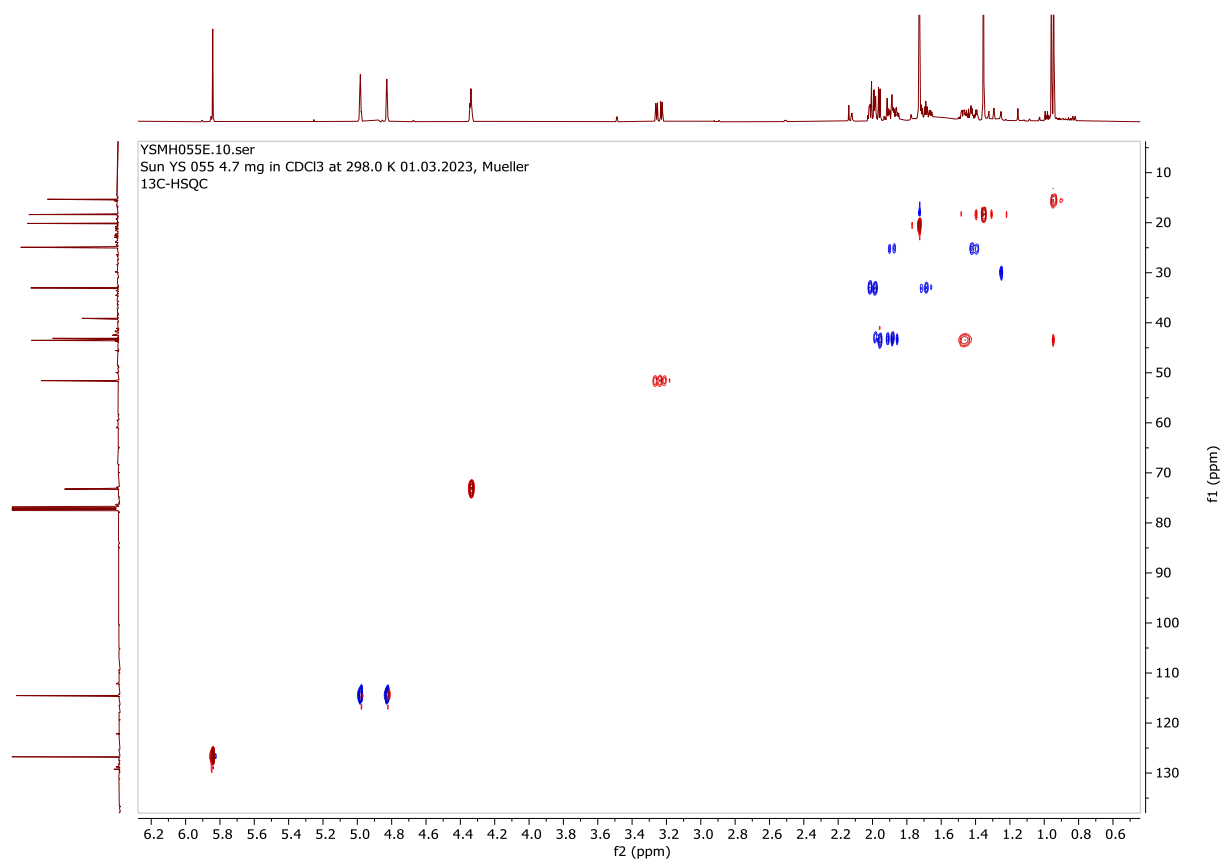

Figure S33 HSQC-spectrum of **8** recorded at 500, 125 MHz in CDCl<sub>3</sub>

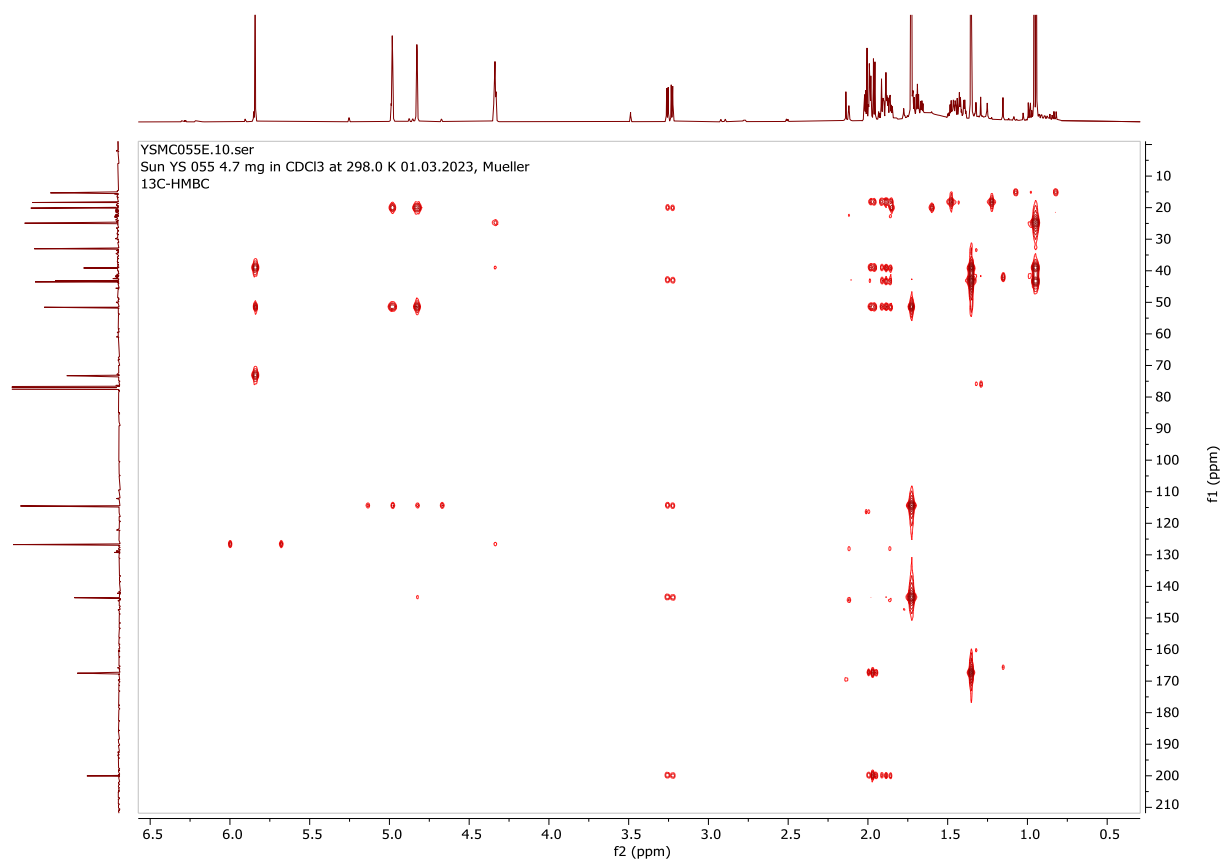

Figure S34 HMBC-spectrum of **8** recorded at 500, 125 MHz in CDCl<sub>3</sub>

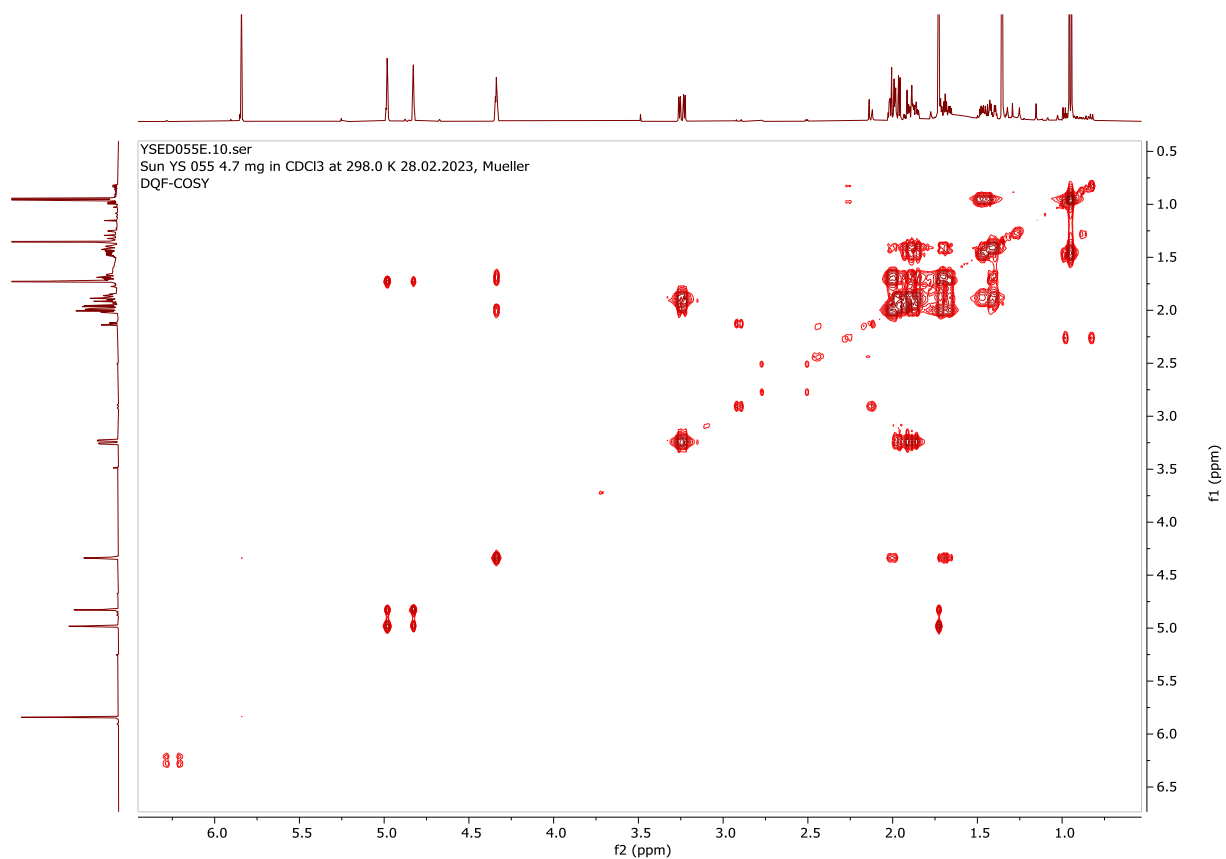

Figure S35  $^1\text{H}$ ,  $^1\text{H}$ -COSY-spectrum of **8** recorded at 500 MHz in  $\text{CDCl}_3$

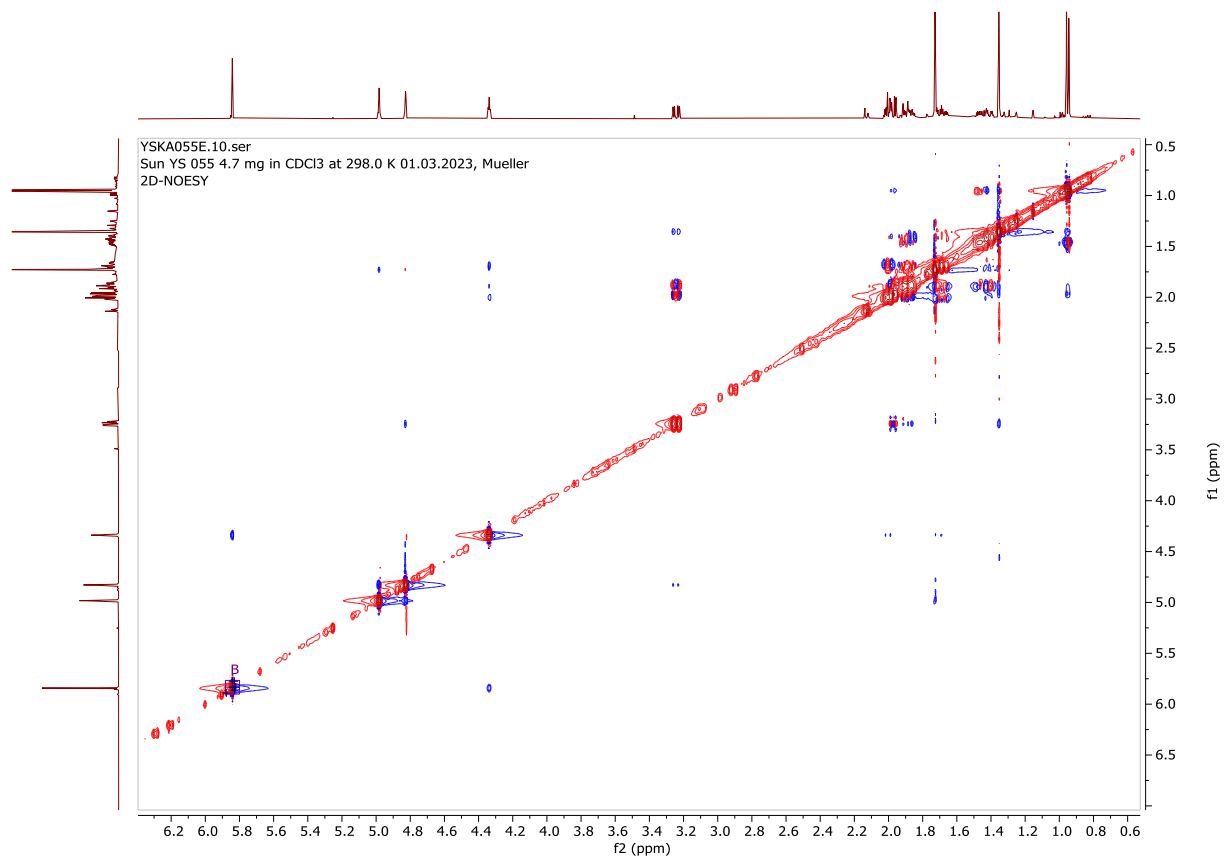

Figure S36 NOESY-spectrum of **8** recorded at 500 MHz in  $\text{CDCl}_3$



## Compound 9

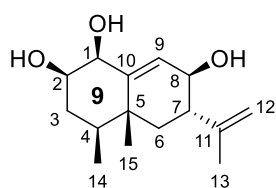

Chemical Formula: C<sub>15</sub>H<sub>24</sub>O<sub>3</sub>  
Exact Mass: 252.1725

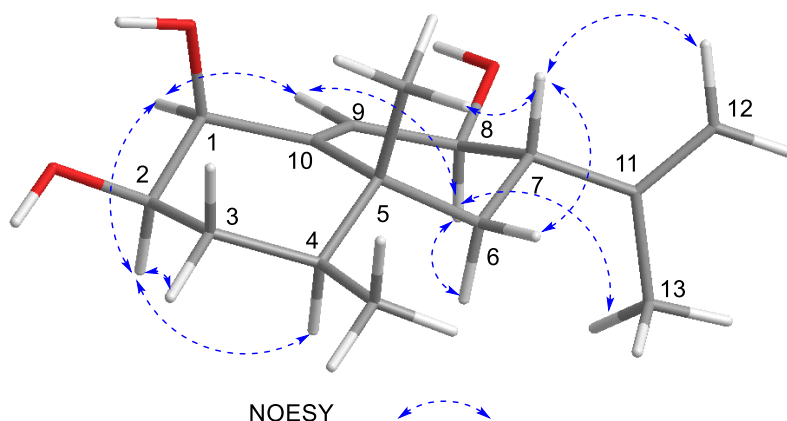

| Compound 9 |                  |                                       |                                     |                  |
|------------|------------------|---------------------------------------|-------------------------------------|------------------|
| Pos.       | $\delta_C$ / ppm | $\delta_H$ / ppm (J/Hz)               | <sup>1</sup> H- <sup>1</sup> H COSY | HMBC (H-C)       |
| 1          | 77.7             | 4.08, 1H, dd (3.4, 1.2)               | 2, 3                                | 2, 3, 5, 9       |
| 2          | 73.2             | 3.51, 1H, ddd (11.8, 4.5, 3.4)        | 1, 3                                | 1, 3             |
| 3          | 34.7             | 1.46, 1H, dddd (12.8, 4.5, 3.2, 1.2); | 3, 4, 2, 1                          | 1, 2, 4, 5, 14   |
|            |                  | 1.81, 1H, ddd (12.7, 12.7, 12.7)      | 3, 4, 2                             | 1, 2, 4, 5, 14   |
| 4          | 42.8             | 1.3, 1H, m                            | 3, 14                               | 3, 5, 14         |
| 5          | 38.6             |                                       |                                     |                  |
| 6          | 44.9             | 1.33, 1H, m;                          | 6, 7                                | 5, 7, 8, 10, 15  |
|            |                  | 1.59, 1H, dd (13.0, 2.6)              | 6, 7                                | 5, 7, 8, 10, 15  |
| 7          | 47.9             | 2.34, 1H, ddd (12.7, 9.7, 2.6)        | 6, 8                                | 6, 8, 11, 12, 13 |
| 8          | 70.6             | 4.04, 1H, dd (9.7, 1.9)               | 7, 9                                | 7, 9, 10, 11, 13 |
| 9          | 132.0            | 5.58, 1H, d (1.9)                     | 8                                   | 1, 5, 7, 10, 11  |
| 10         | 146.2            |                                       |                                     |                  |
| 11         | 148.3            |                                       |                                     |                  |
| 12         | 111.9            | 4.83, 2H, m                           | 13                                  | 7, 11, 13        |
| 13         | 20.1             | 1.74, 3H, m                           | 12                                  | 7, 11, 12        |
| 14         | 15.2             | 0.85, 3H, d (6.9)                     | 4                                   | 3, 4, 5          |
| 15         | 20.5             | 1.18, 3H, s                           |                                     | 4, 5, 6, 10      |

Table S13 Summarized NMR signals for <sup>13</sup>C, <sup>1</sup>H, <sup>1</sup>H-<sup>1</sup>H COSY, HMBC for **9** recorded in CD<sub>3</sub>OD

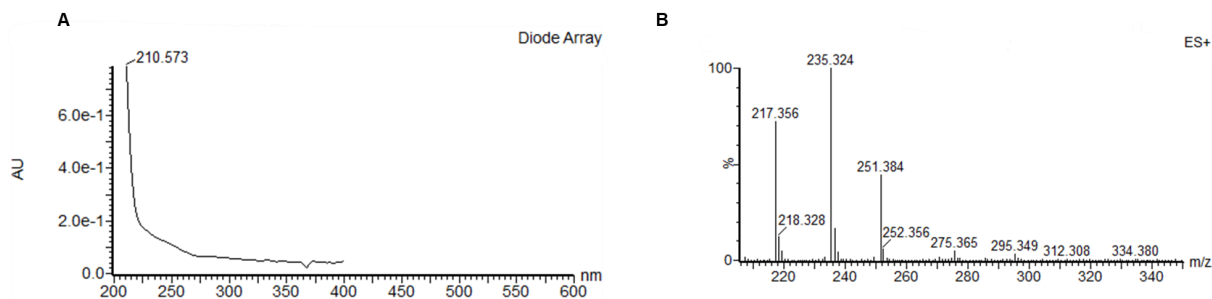

**Figure S37** UV-absorption **(A)** and fragmentation pattern **(B)** of **9** in ES<sup>+</sup> TIC by LR-LCMS

### Elemental Composition Report

Page 1

#### Single Mass Analysis

Tolerance = 20.0 PPM / DBE: min = -1.5, max = 50.0

Element prediction: Off

Number of isotope peaks used for i-FIT = 3

Monoisotopic Mass, Even Electron Ions

28 formula(e) evaluated with 1 results within limits (all results (up to 1000) for each mass)

Elements Used:

C: 0-90 H: 0-50 O: 0-8

Sun

QToF Premier HAB321

YS 056 447 (4.562) AM (Cen,4, 70.00, Ht,10000.0,556.28,0.70,LS 10)

1: TOF MS ES+  
1.34e+002

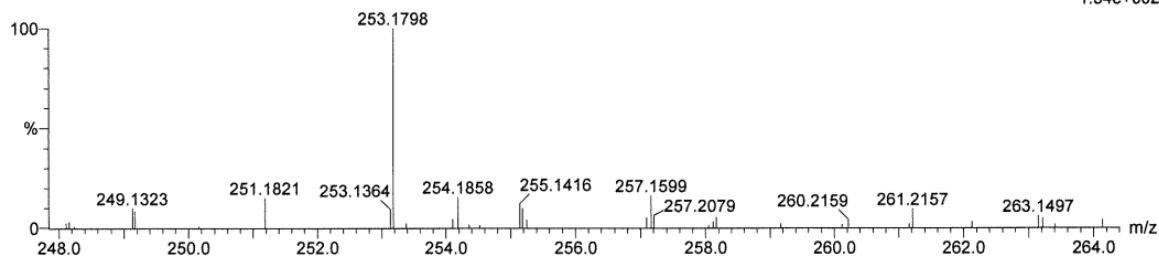

Minimum: -1.5  
Maximum: 5.0 20.0 50.0

| Mass     | Calc. Mass | mDa  | PPM  | DBE | i-FIT | i-FIT (Norm) | Formula    |
|----------|------------|------|------|-----|-------|--------------|------------|
| 253.1798 | 253.1804   | -0.6 | -2.4 | 3.5 | 27.2  | 0.0          | C15 H25 O3 |

**Figure S38** HRMS data for **9**;  $m/z$  (M+H)<sup>+</sup> calc. mass is 253.1804, 253.1798 was found

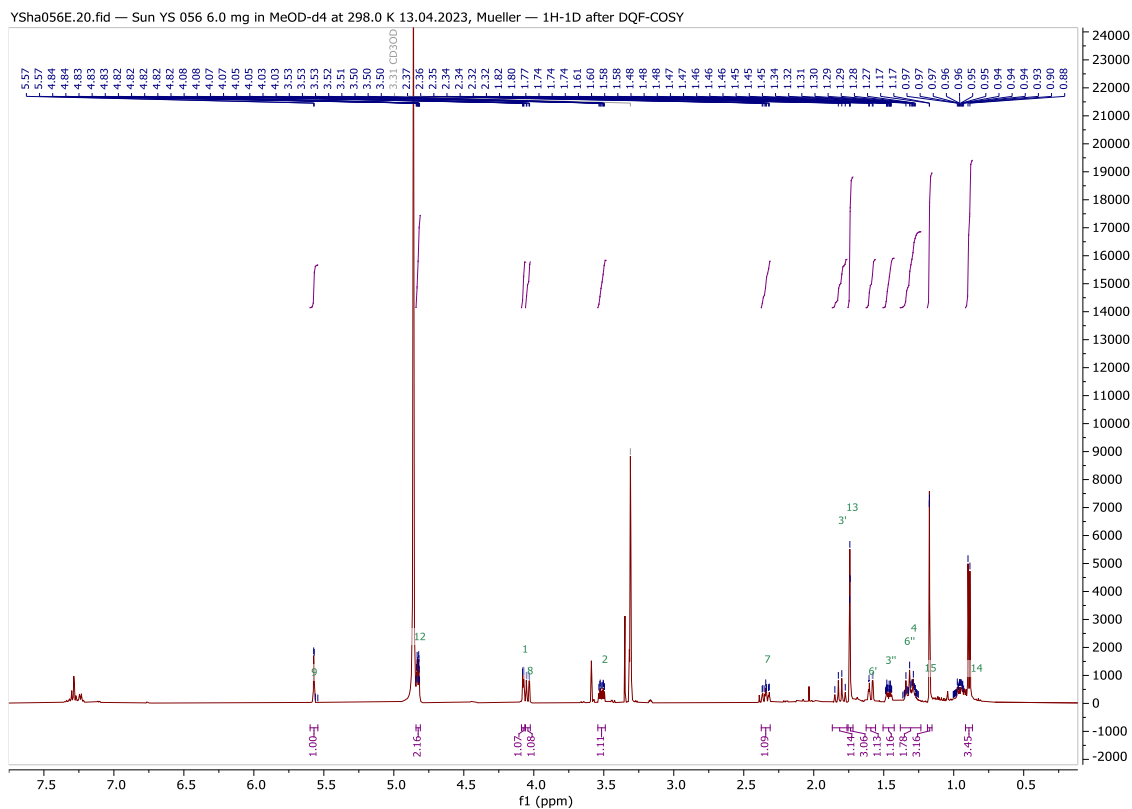

Figure S39 <sup>1</sup>H-NMR of **9** recorded at 500 MHz in CD<sub>3</sub>OD

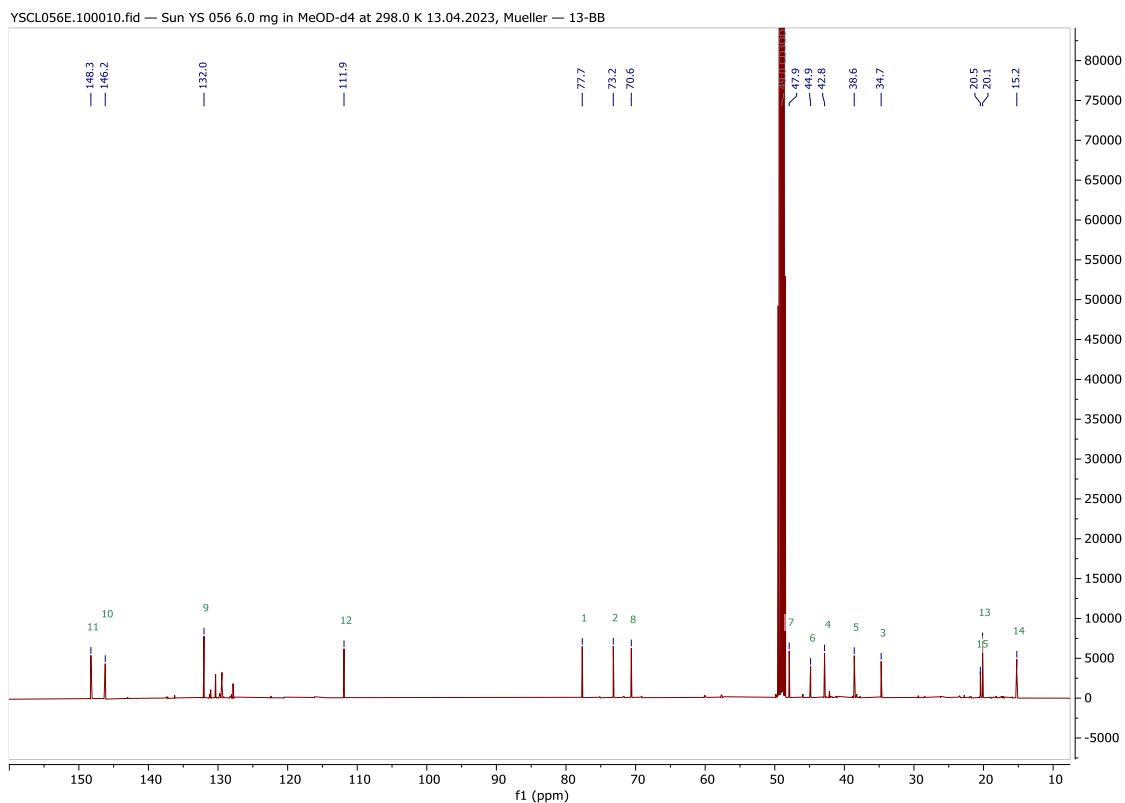

Figure S40 <sup>13</sup>C-NMR of **9** recorded at 125 MHz in CD<sub>3</sub>OD

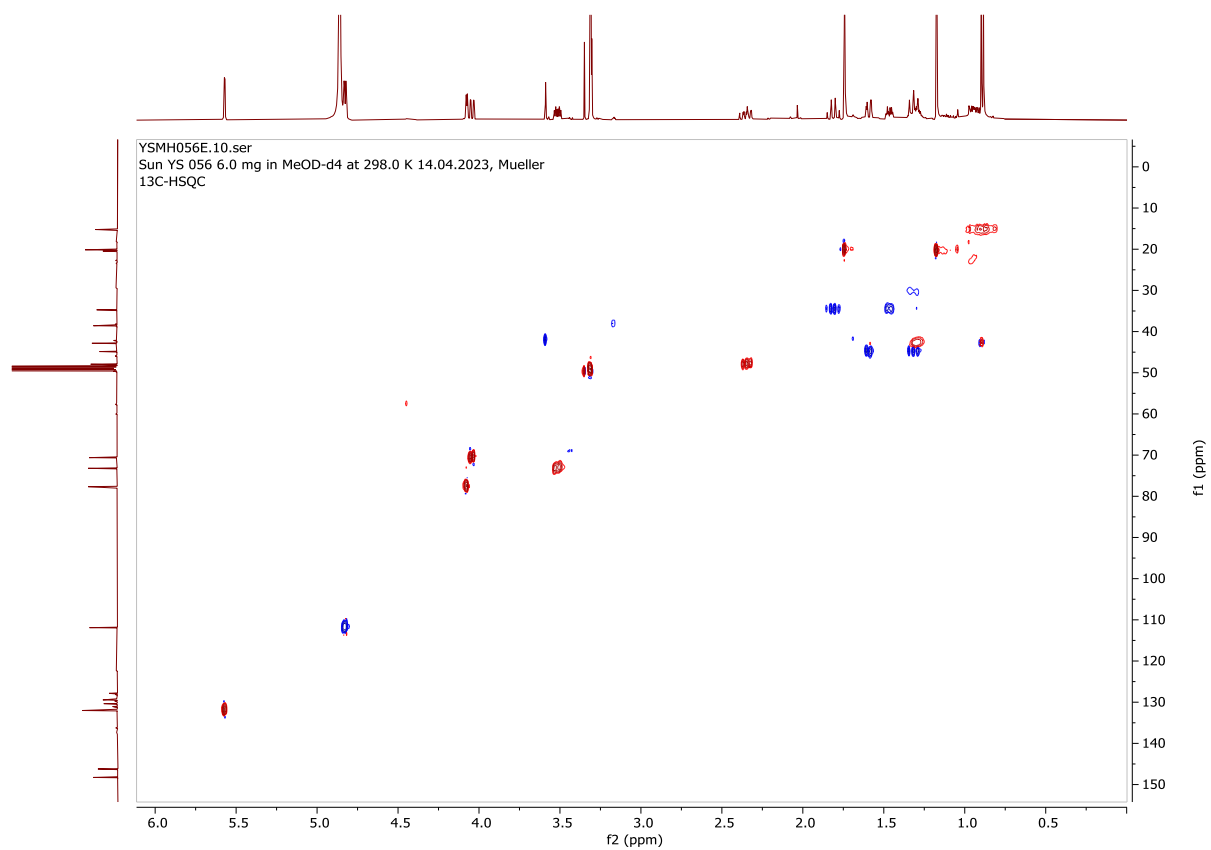

Figure S41 HSQC-spectrum of **9** recorded at 500, 125 MHz in CD<sub>3</sub>OD

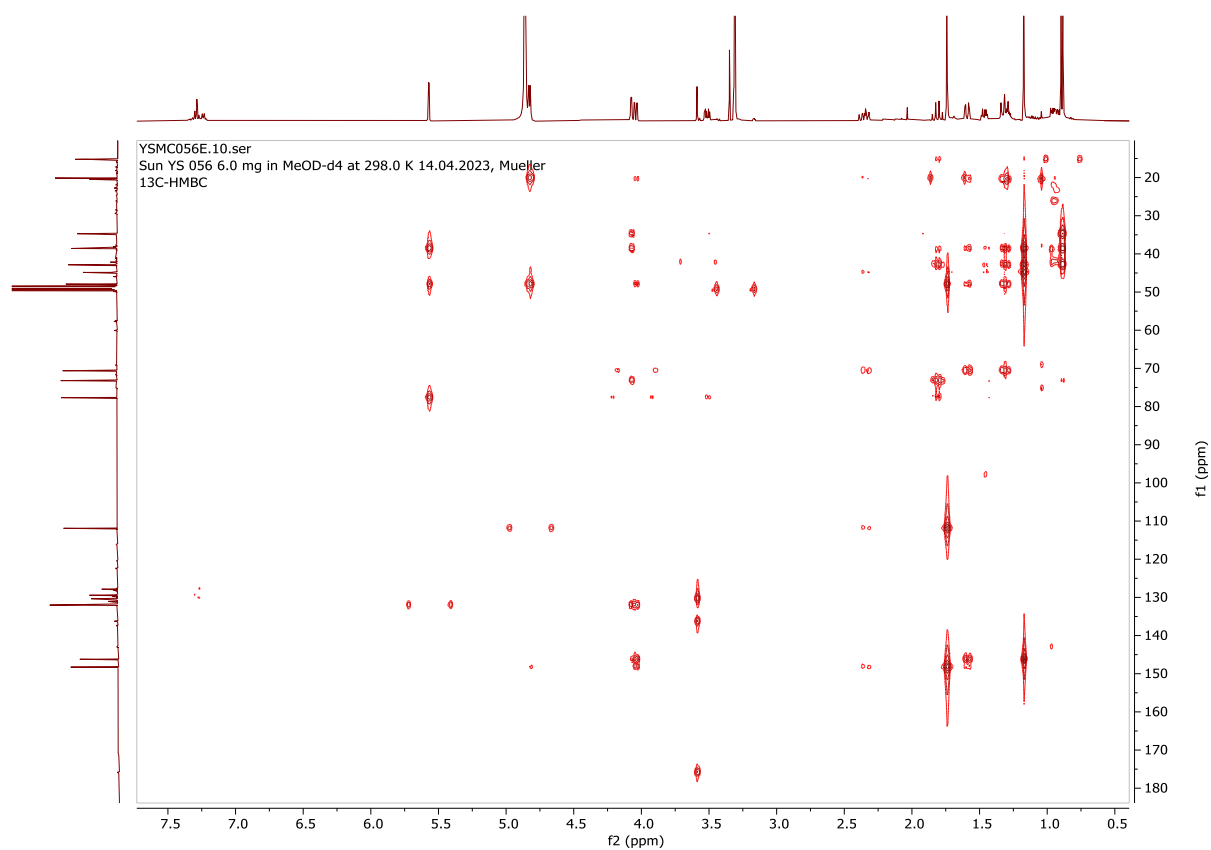

Figure S42 HMBC-spectrum of **9** recorded at 500, 125 MHz in CD<sub>3</sub>OD

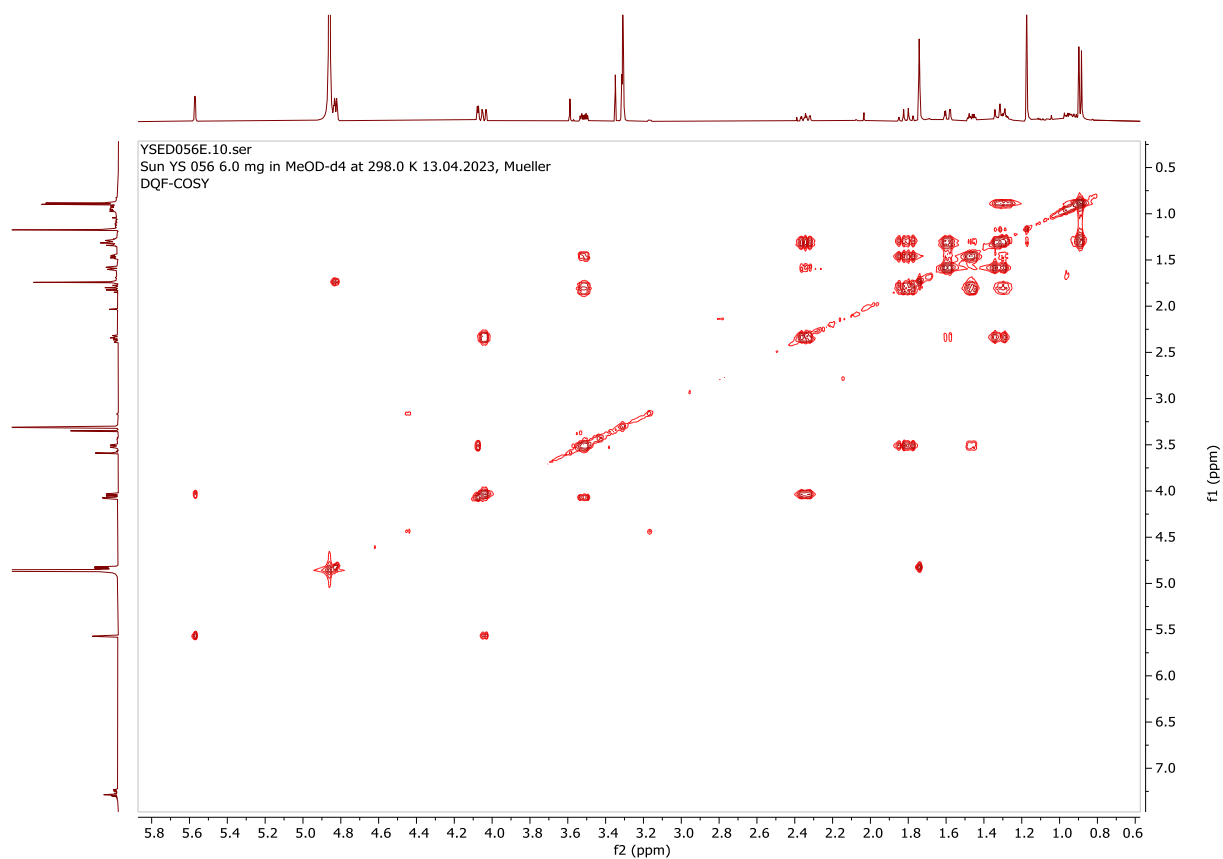

Figure S43  $^1\text{H}$ ,  $^1\text{H}$ -COSY-spectrum of **9** recorded at 500 MHz in  $\text{CD}_3\text{OD}$

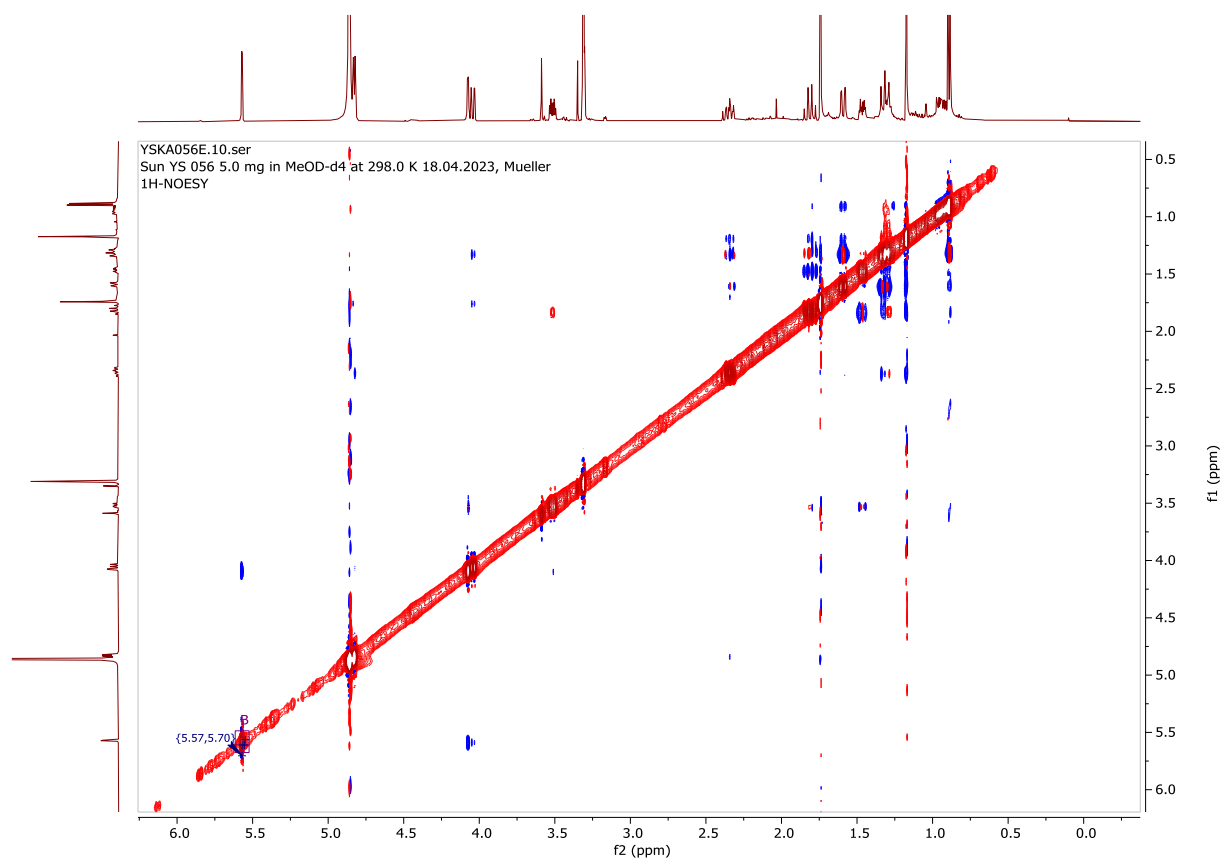

Figure S44 NOESY -spectrum of **9** recorded at 500 MHz in  $\text{CD}_3\text{OD}$

## Compound 10

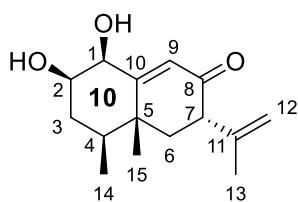

Chemical Formula: C<sub>15</sub>H<sub>22</sub>O<sub>3</sub>  
Exact Mass: 250.1569

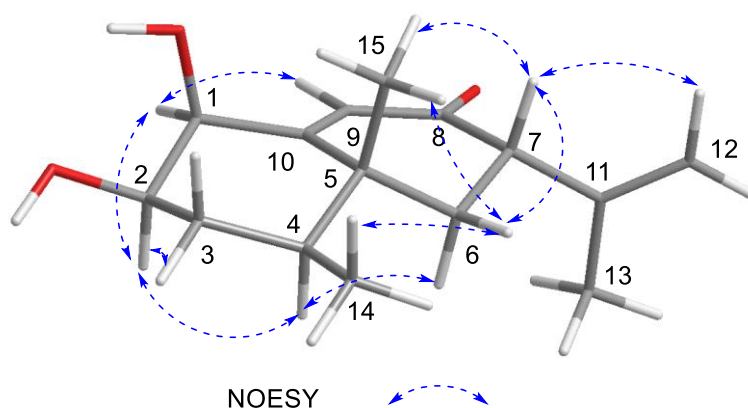

| Compound 10 |                  |                                       |                                     |                     |
|-------------|------------------|---------------------------------------|-------------------------------------|---------------------|
| Pos.        | $\delta_c$ / ppm | $\delta_H$ / ppm (J/Hz)               | <sup>1</sup> H- <sup>1</sup> H COSY | HMBC (H-C)          |
| 1           | 75.8             | 4.28, 1H, d (3.2)                     | 2, 3                                | 2, 3, 5, 9, 10      |
| 2           | 71.0             | 3.73, 1H, ddd (11.7, 4.7, 3.5)        | 3, 1                                | 1, 3, 4             |
| 3           | 33.6             | 1.62, 1H, dddd (12.9, 4.6, 3.2, 1.2); | 3, 4, 2, 1                          | 1, 2, 4, 5          |
|             |                  | 1.85, 1H, m                           | 3, 4, 2                             | 1, 2, 4, 5          |
| 4           | 40.6             | 1.48, 1H, m                           | 3, 14                               | 3, 4, 5             |
| 5           | 38.2             |                                       |                                     |                     |
| 6           | 43.0             | 1.85, 1H, m;                          | 6, 7                                | 5, 7, 8, 10, 15     |
|             |                  | 1.97, 1H, dd (13.0, 4.4)              | 6, 7                                | 5, 7, 8, 10, 15     |
| 7           | 51.4             | 3.24, 1H, dd (14.4, 4.4)              | 6                                   | 5, 6, 8, 11, 12, 13 |
| 8           | 199.6            |                                       |                                     |                     |
| 9           | 128.9            | 5.92, 1H, s                           |                                     | 1, 5, 7, 8, 10      |
| 10          | 165.0            |                                       |                                     |                     |
| 11          | 143.3            |                                       |                                     |                     |
| 12          | 114.6            | 4.82, 1H, m;                          | 12, 13                              | 7, 11, 13           |
|             |                  | 4.98, 1H, m                           | 12, 13                              | 7, 11, 13           |
| 13          | 20.2             | 1.7, 3H, m                            | 12                                  | 7, 11, 12           |
| 14          | 14.9             | 0.96, 3H, d (6.9)                     | 4                                   | 3, 4, 5             |
| 15          | 18.1             | 1.32, 3H, s                           |                                     | 4, 5, 6             |

**Table S14** Summarized NMR signals for <sup>13</sup>C, <sup>1</sup>H, <sup>1</sup>H-<sup>1</sup>H COSY, HMBC for **10** recorded in CDCl<sub>3</sub>

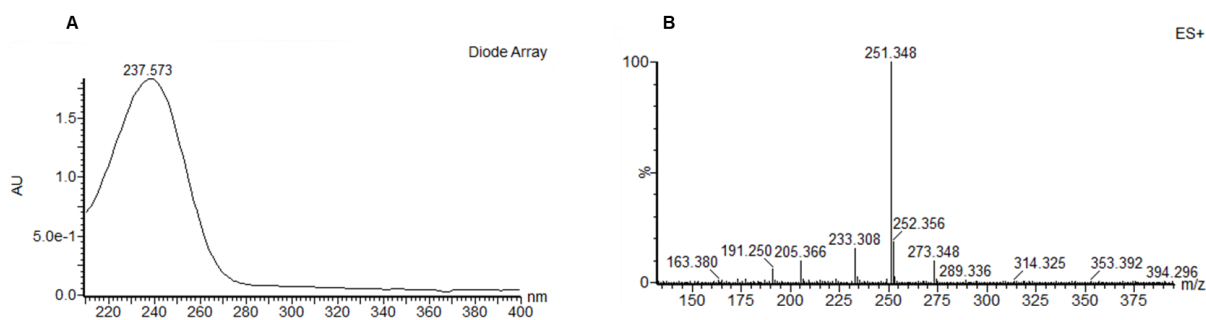

**Figure S45** UV-absorption (**A**) and fragmentation pattern (**B**) of **10** in ES<sup>+</sup> TIC by LR-LCMS

## Elemental Composition Report

Page 1

### Single Mass Analysis

Tolerance = 20.0 PPM / DBE: min = -1.5, max = 50.0

Element prediction: Off

Number of isotope peaks used for i-FIT = 3

Monoisotopic Mass, Odd and Even Electron Ions

118 formula(e) evaluated with 5 results within limits (all results (up to 1000) for each mass)

Elements Used:

C: 0-40 H: 0-60 N: 0-5 O: 0-5

Sun

QToF Premier HAB321

YS 054, neg 585 (5.987) AM (Cen,4, 70.00, Ht,10000.0,554.26,0.70,LS 10)

1: TOF MS ES-  
1.60e+002

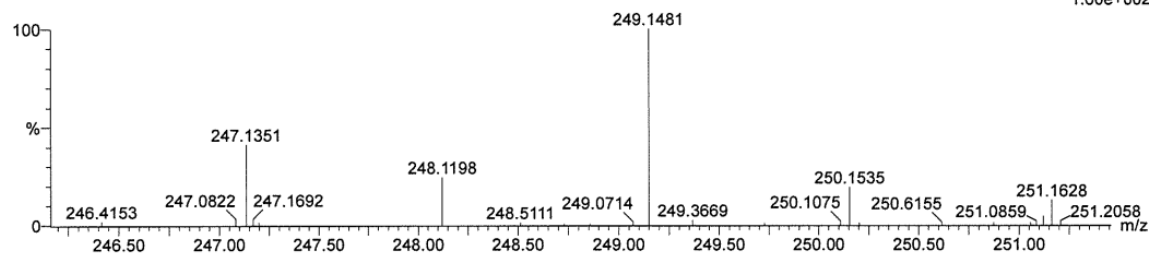

Minimum: -1.5  
 Maximum: 5.0 20.0 50.0

| Mass     | Calc. Mass | mDa  | PPM   | DBE  | i-FIT | i-FIT (Norm) | Formula       |
|----------|------------|------|-------|------|-------|--------------|---------------|
| 249.1481 | 249.1477   | 0.4  | 1.6   | 6.0  | 36.5  | 1.6          | C13 H19 N3 O2 |
|          | 249.1491   | -1.0 | -4.0  | 5.5  | 35.8  | 0.9          | C15 H21 O3    |
|          | 249.1450   | 3.1  | 12.4  | 1.5  | 37.7  | 2.8          | C10 H21 N2 O5 |
|          | 249.1517   | -3.6 | -14.4 | 10.0 | 36.1  | 1.2          | C18 H19 N     |
|          | 249.1437   | 4.4  | 17.7  | 2.0  | 38.6  | 3.7          | C8 H19 N5 O4  |

**Figure S46** HRMS data for **10**;  $m/z$  (M-H)<sup>-</sup> calc. mass is 249.1491, 249.1481 was found

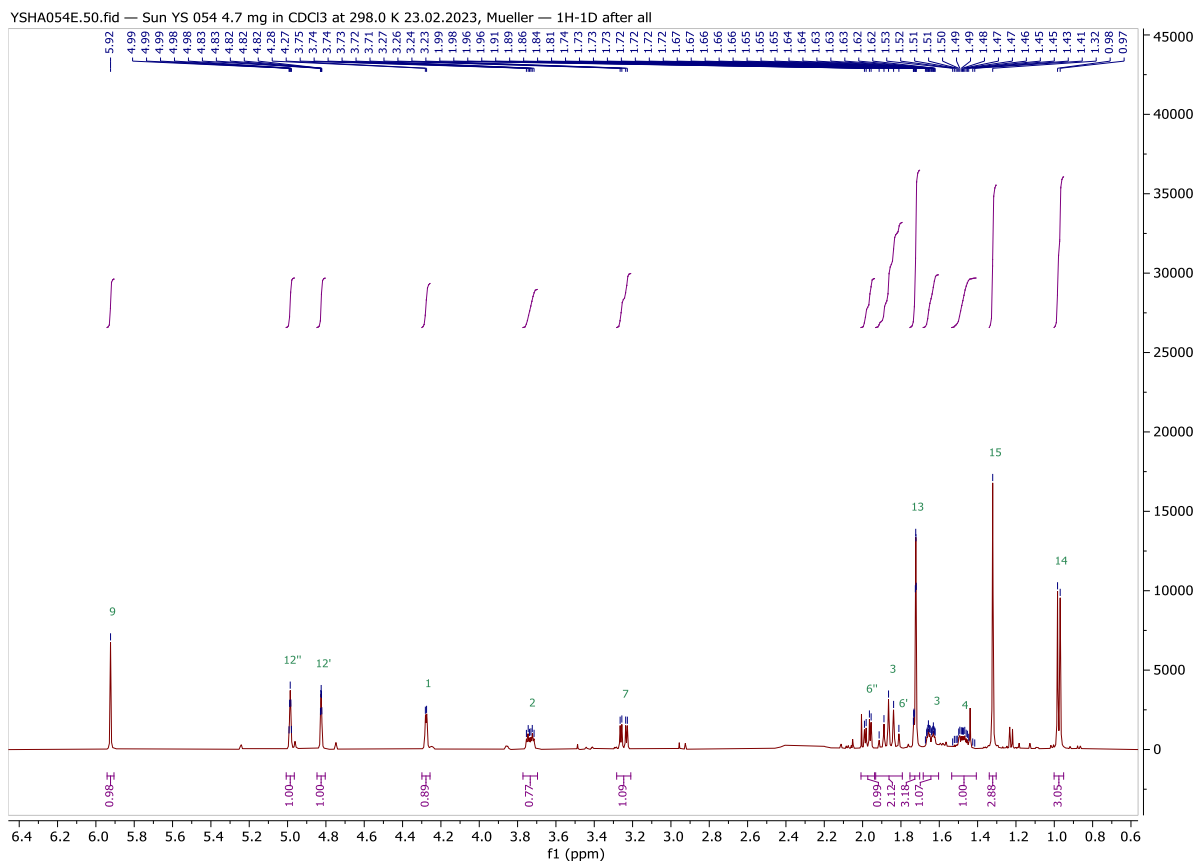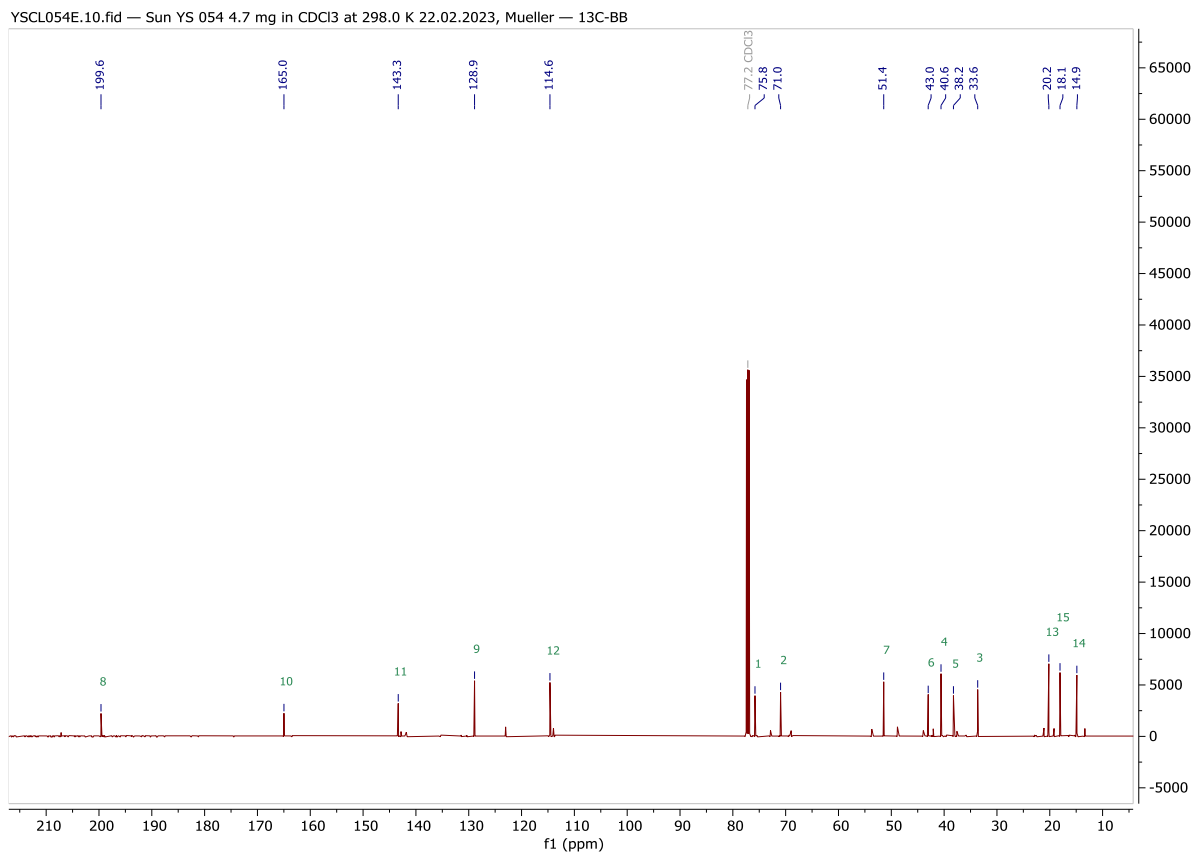



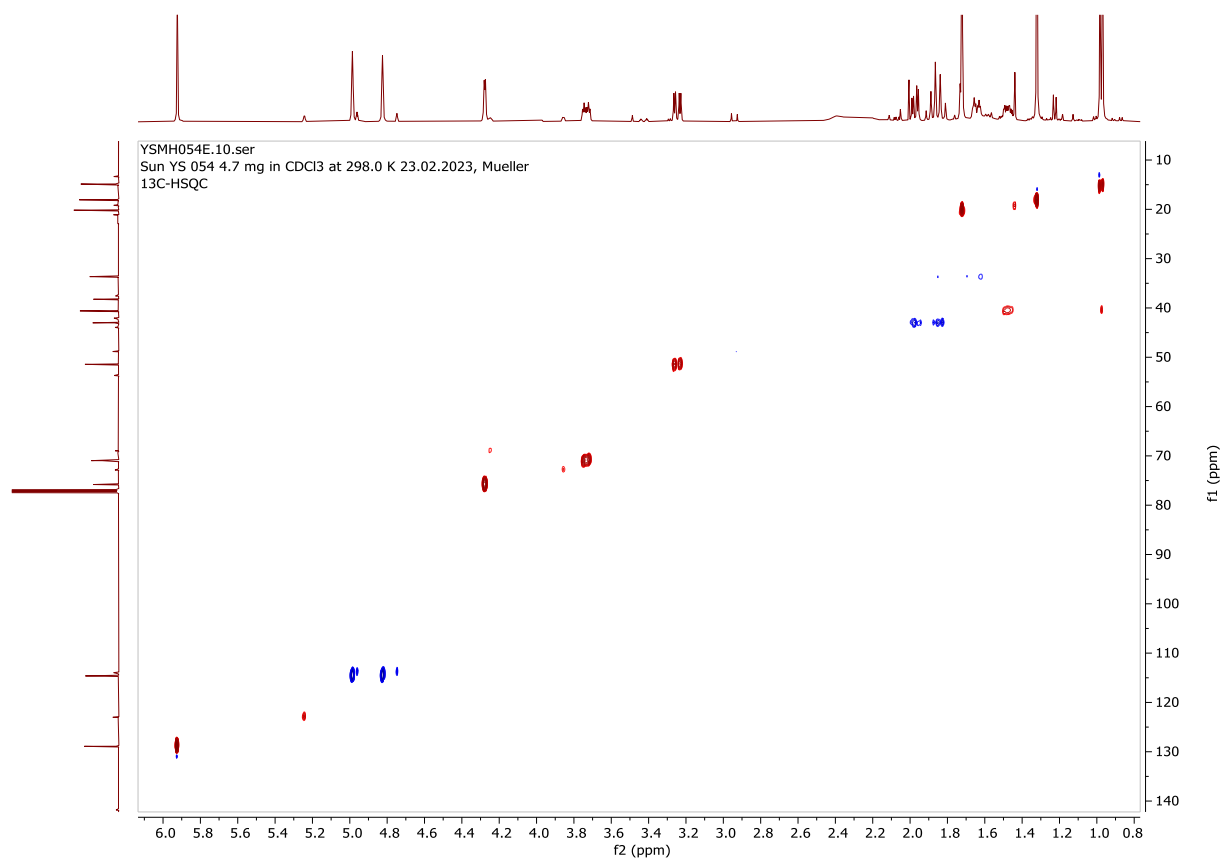

Figure S49 HSQC-spectrum of **10** recorded at 500, 125 MHz in CDCl<sub>3</sub>

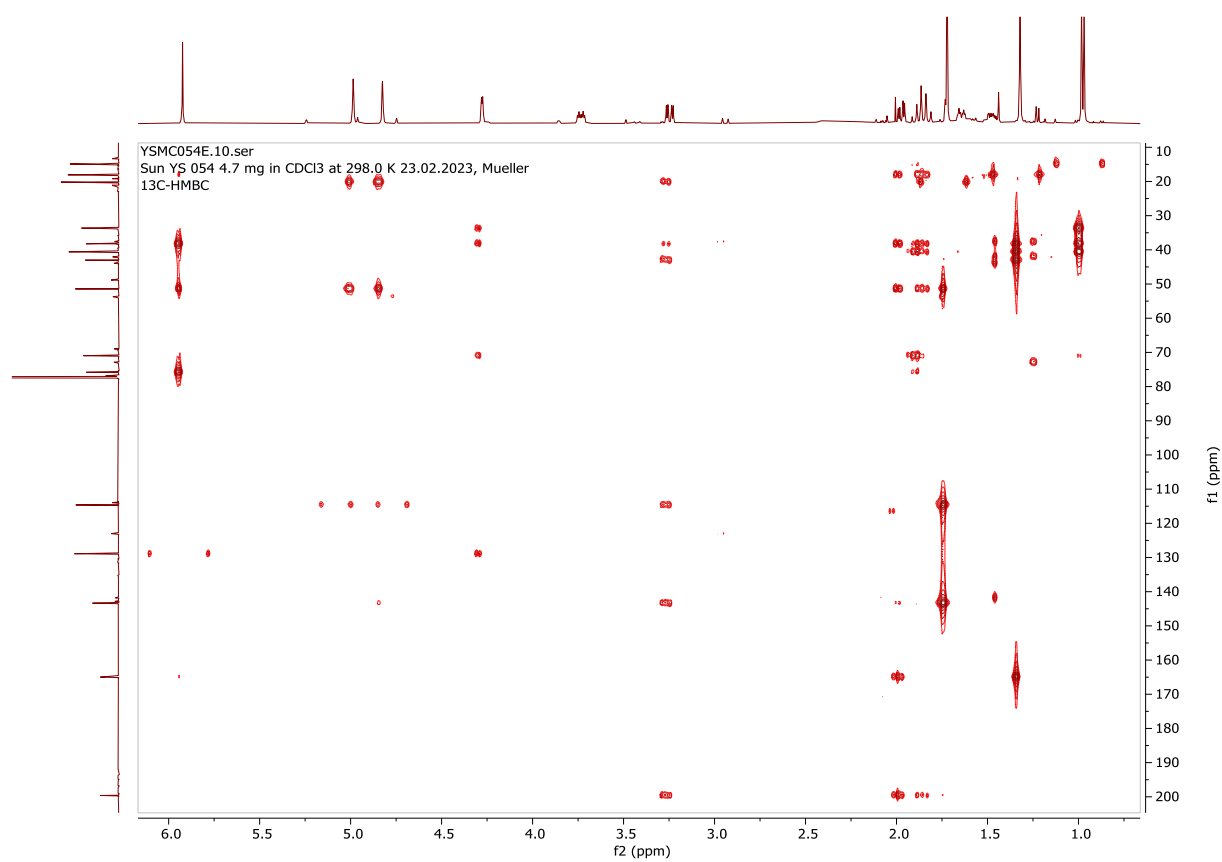

Figure S50 HMBC-spectrum of **10** recorded at 500, 125 MHz in CDCl<sub>3</sub>

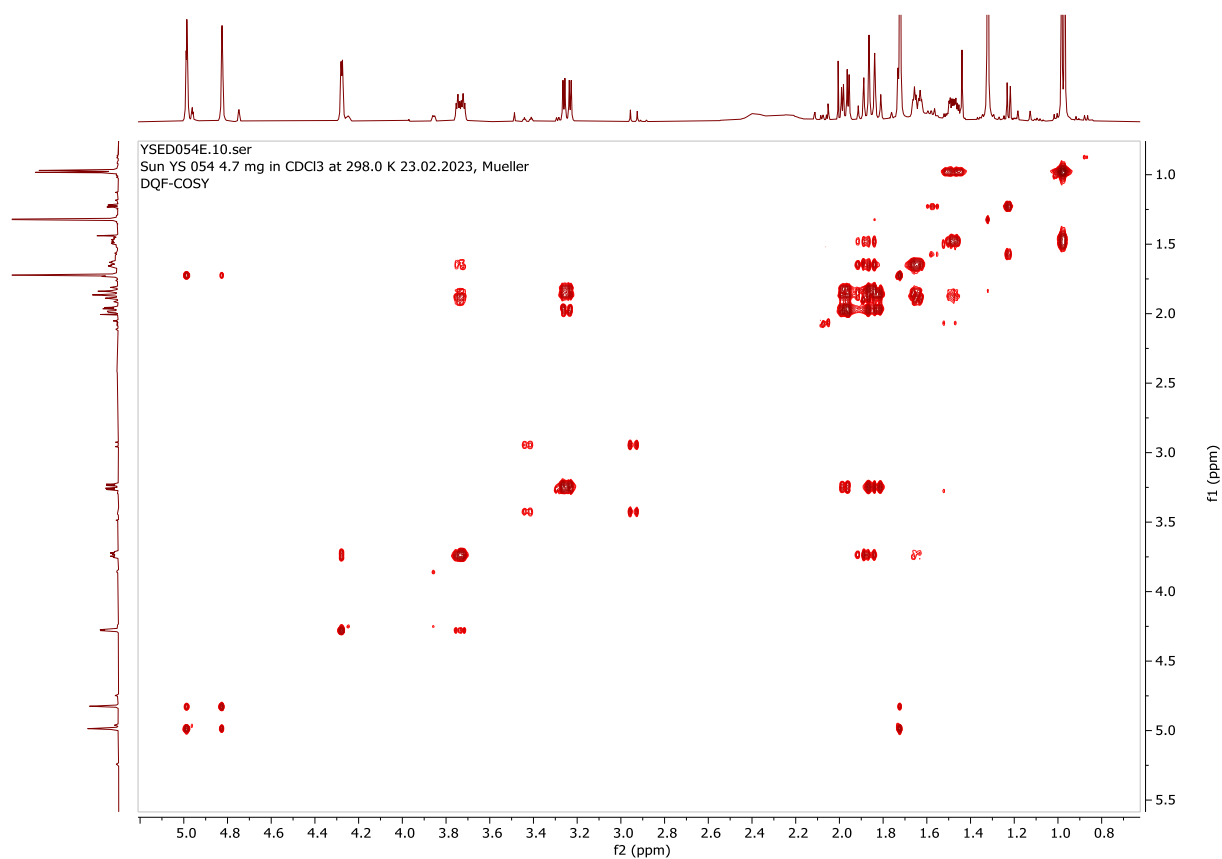

Figure S51 <sup>1</sup>H, <sup>1</sup>H-COSY -spectrum of **10** recorded at 500 MHz in CDCl<sub>3</sub>

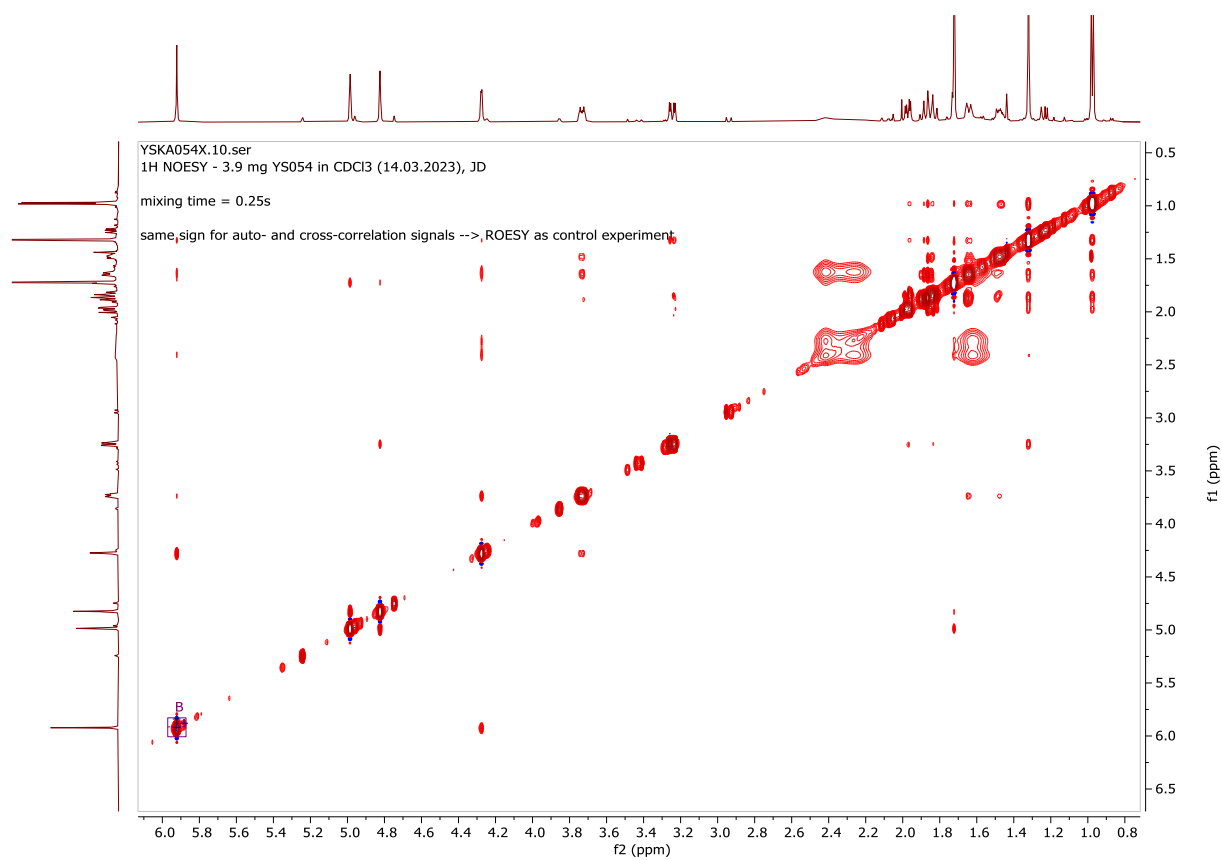

Figure S52 NOESY-spectrum of **10** recorded at 600 MHz in CDCl<sub>3</sub>

## Compound 11

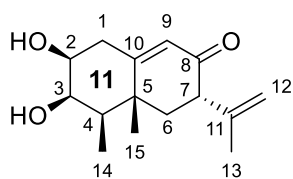

Chemical Formula: C<sub>15</sub>H<sub>22</sub>O<sub>3</sub>  
Exact Mass: 250.1569

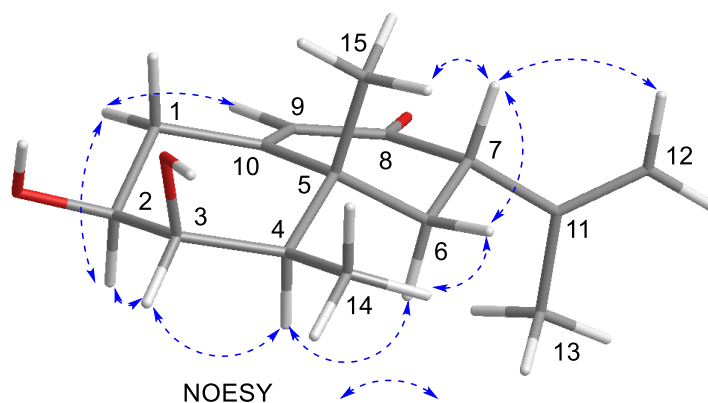

| Compound 11 |                  |                                     |                                     |                     |
|-------------|------------------|-------------------------------------|-------------------------------------|---------------------|
| Pos.        | $\delta_c$ / ppm | $\delta_H$ / ppm (J/Hz)             | <sup>1</sup> H- <sup>1</sup> H COSY | HMBC (H-C)          |
| 1           | 36.2             | 2.34, 1H, dd (13.1, 4.7);           | 1, 2                                | 2, 3, 9, 10         |
|             |                  | 2.79, 1H, ddd (13.1, 12.5, 2.1)     | 1, 2, 9                             | 2, 3, 9, 10         |
| 2           | 71.4             | 3.73, 1H, ddd (12.2, 4.8, 3.1)      | 1, 3                                |                     |
| 3           | 74.5             | 3.86, 1H, dd (3.3, 3.3)             | 2, 4                                | 2, 4, 5, 14         |
| 4           | 44.5             | 1.47, 1H, dddd (7.1, 7.1, 7.1, 2.6) | 14, 3                               | 5, 6, 14, 15        |
| 5           | 38.6             |                                     |                                     |                     |
| 6           | 42.2             | 1.78, 1H, dd (13.7, 13.7);          | 6, 7                                | 4, 5, 7, 8, 15      |
|             |                  | 1.98, 1H, dd (13.0, 4.5)            | 6, 7                                | 5, 7, 8, 10, 15     |
| 7           | 50.6             | 3.15, 1H, dd (14.4, 4.5)            | 6                                   | 5, 6, 8, 11, 12, 13 |
| 8           | 199.1            |                                     |                                     |                     |
| 9           | 125.7            | 5.82, 1H, d (1.9)                   | 1                                   | 1, 5, 7             |
| 10          | 167.1            |                                     |                                     |                     |
| 11          | 143.5            |                                     |                                     |                     |
| 12          | 114.6            | 4.81, 1H, m;                        | 12, 13                              | 7, 11, 13           |
|             |                  | 4.97, 1H, m                         | 12, 13                              | 7, 11, 13           |
| 13          | 20.2             | 1.72, 3H, m                         | 12                                  | 7, 11, 12           |
| 14          | 11.8             | 1.16, 3H, d (7.1)                   | 4                                   | 3, 4, 5             |
| 15          | 18.8             | 1.36, 3H, s                         |                                     | 4, 5, 6, 10         |

Table S15 Summarized NMR signals for <sup>13</sup>C, <sup>1</sup>H, <sup>1</sup>H-<sup>1</sup>H COSY, HMBC for **11** recorded in CDCl<sub>3</sub>

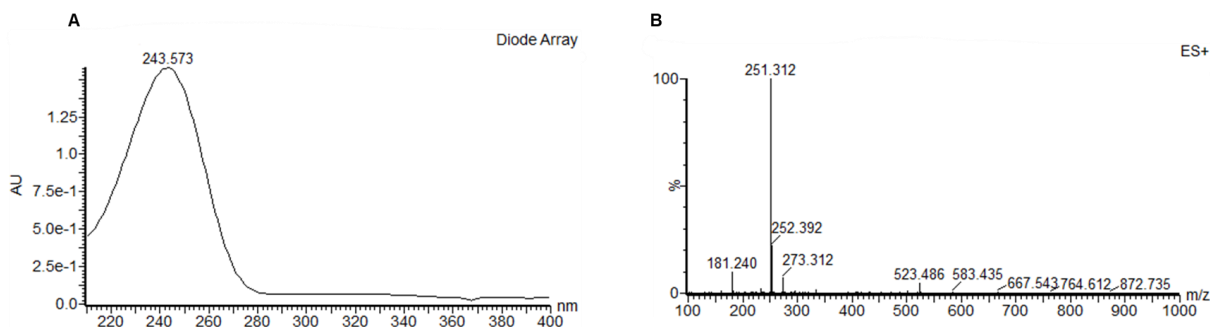

Figure S53 UV-absorption (A) and fragmentation pattern (B) of 11 in ES<sup>+</sup> TIC by LR-LCMS

### Elemental Composition Report

Page 1

#### Single Mass Analysis

Tolerance = 20.0 PPM / DBE: min = -1.5, max = 50.0  
 Element prediction: Off  
 Number of isotope peaks used for i-FIT = 3

Monoisotopic Mass, Odd and Even Electron Ions

225 formula(e) evaluated with 6 results within limits (all results (up to 1000) for each mass)

Elements Used:

C: 0-40 H: 0-60 N: 0-5 O: 0-5 Na: 0-1

Sun

QToF Premier HAB321

YS 053 680 (6.935) AM (Cen,4, 70.00, Ht,10000.0,556.28,0.70,LS 10)

1: TOF MS ES+  
1.71e+002

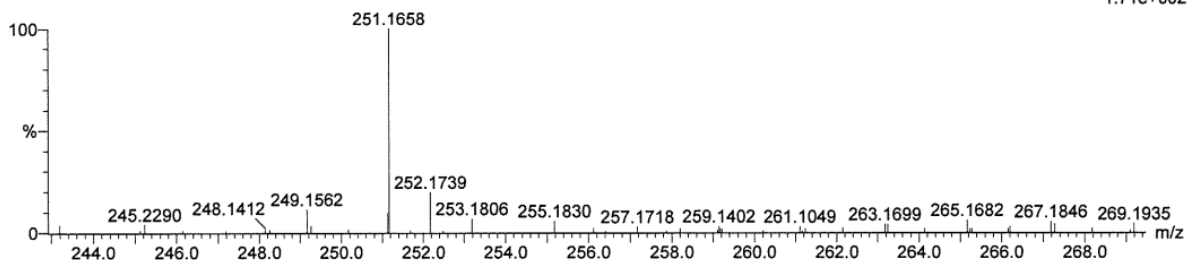

Minimum: 5.0 20.0 -1.5  
 Maximum: 5.0 20.0 50.0

| Mass     | Calc. Mass | mDa  | PPM  | DBE | i-FIT | i-FIT (Norm) | Formula          |
|----------|------------|------|------|-----|-------|--------------|------------------|
| 251.1658 | 251.1650   | 0.8  | 3.2  | 6.0 | 12.1  | 1.5          | C16 H22 N Na     |
|          | 251.1647   | 1.1  | 4.4  | 4.5 | 12.1  | 1.5          | C15 H23 O3       |
|          | 251.1674   | -1.6 | -6.4 | 9.0 | 11.5  | 0.9          | C18 H21 N        |
|          | 251.1634   | 2.4  | 9.6  | 5.0 | 13.1  | 2.5          | C13 H21 N3 O2    |
|          | 251.1623   | 3.5  | 13.9 | 1.5 | 13.5  | 2.9          | C13 H24 O3 Na    |
|          | 251.1610   | 4.8  | 19.1 | 2.0 | 14.6  | 4.0          | C11 H22 N3 O2 Na |

Figure S54 HRMS data for 11;  $m/z$  (M + H)<sup>+</sup> calc. mass is 251.1647, 251.1658 was found

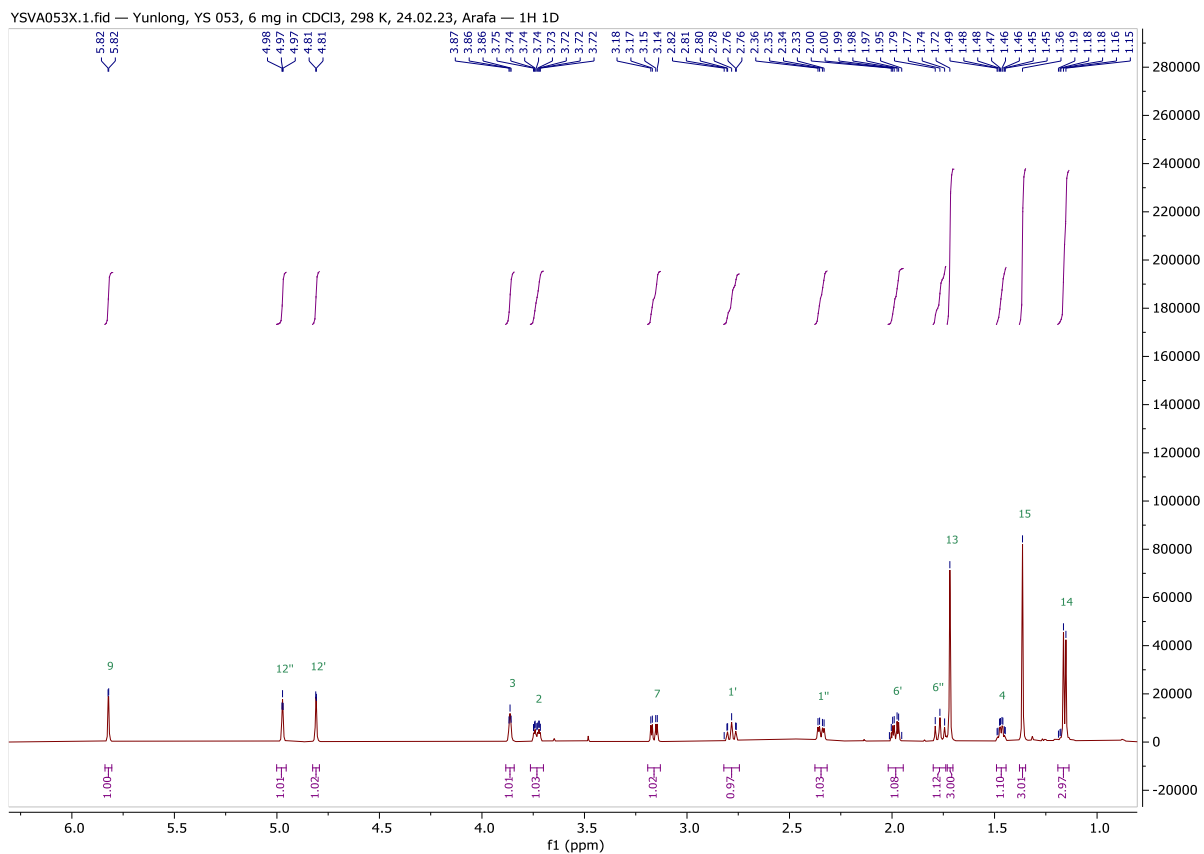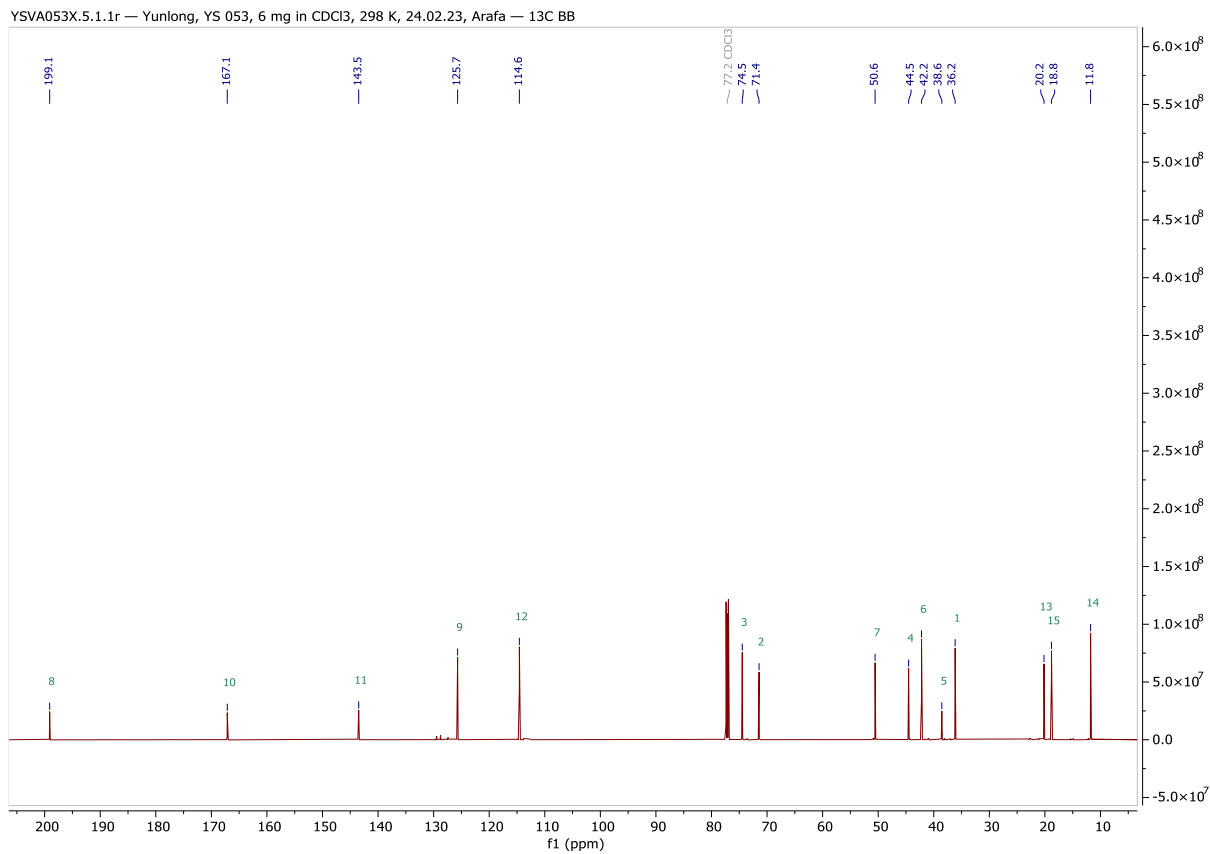

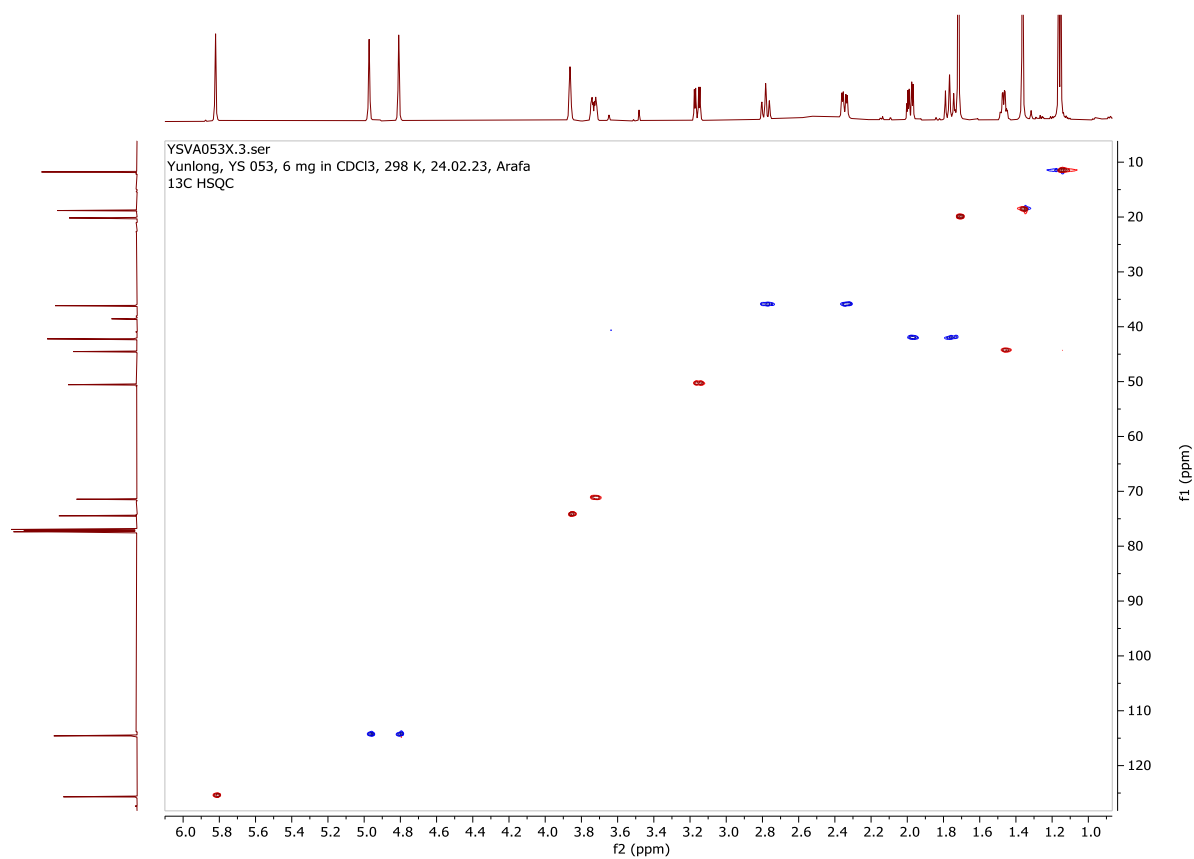

Figure S57 HSQC-spectrum of **11** recorded at 600, 150 MHz in CDCl<sub>3</sub>

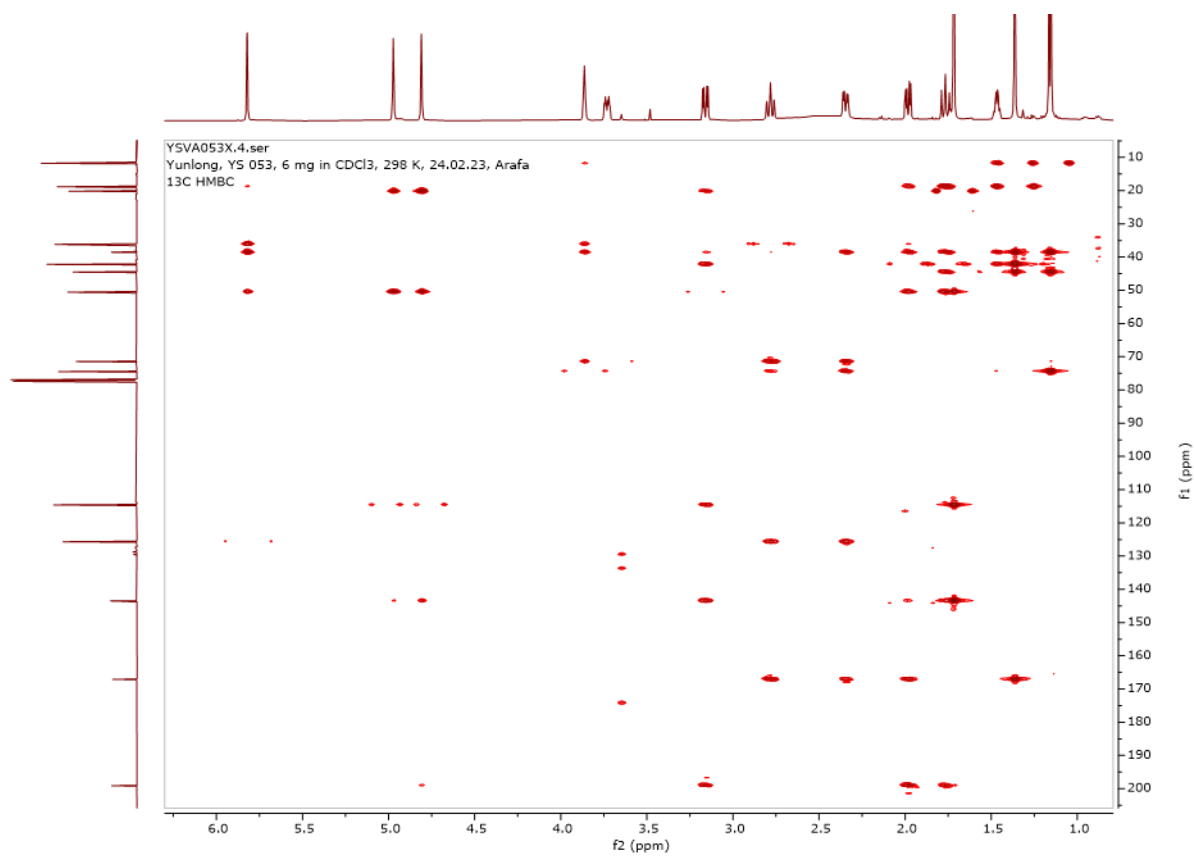

Figure S58 HMBC-spectrum of **11** recorded at 600, 150 MHz in CDCl<sub>3</sub>

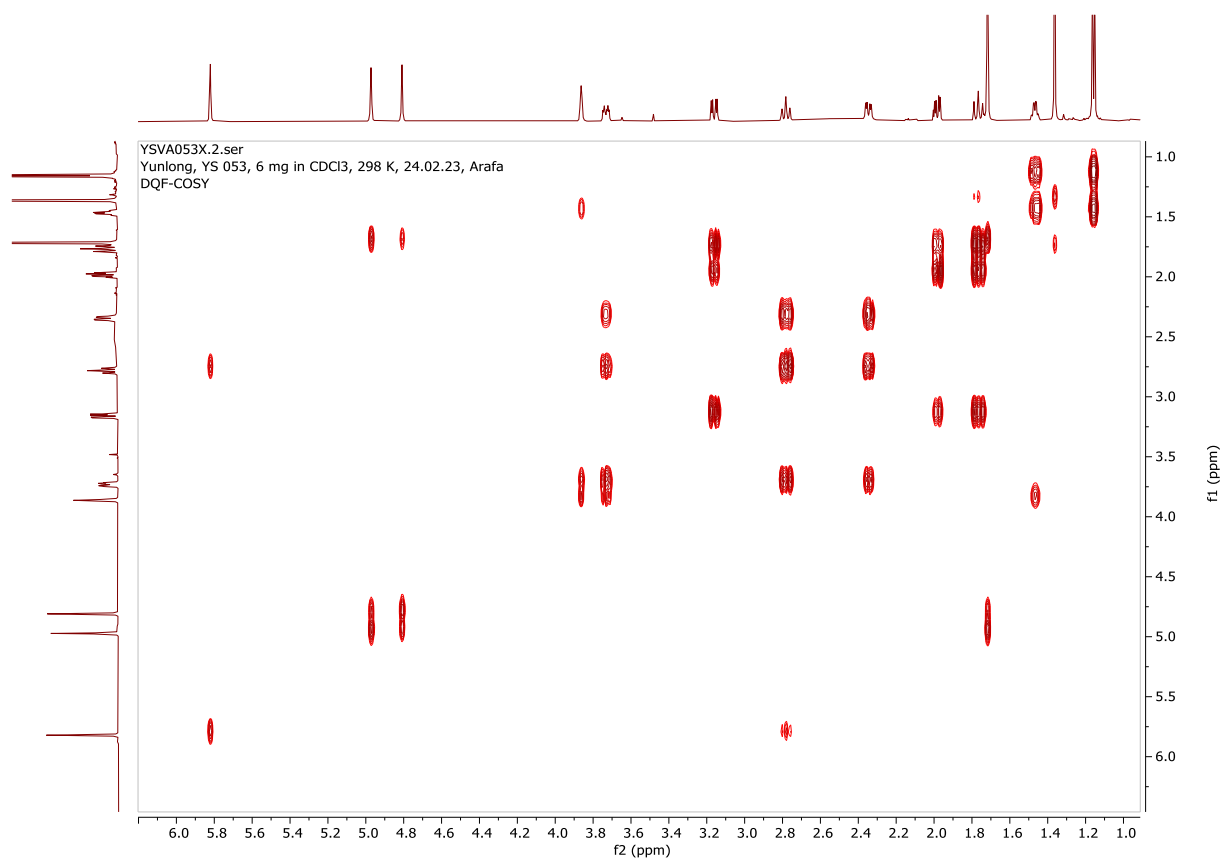

Figure S59 <sup>1</sup>H, <sup>1</sup>H-COSY-spectrum of **11** recorded at 600 MHz in CDCl<sub>3</sub>

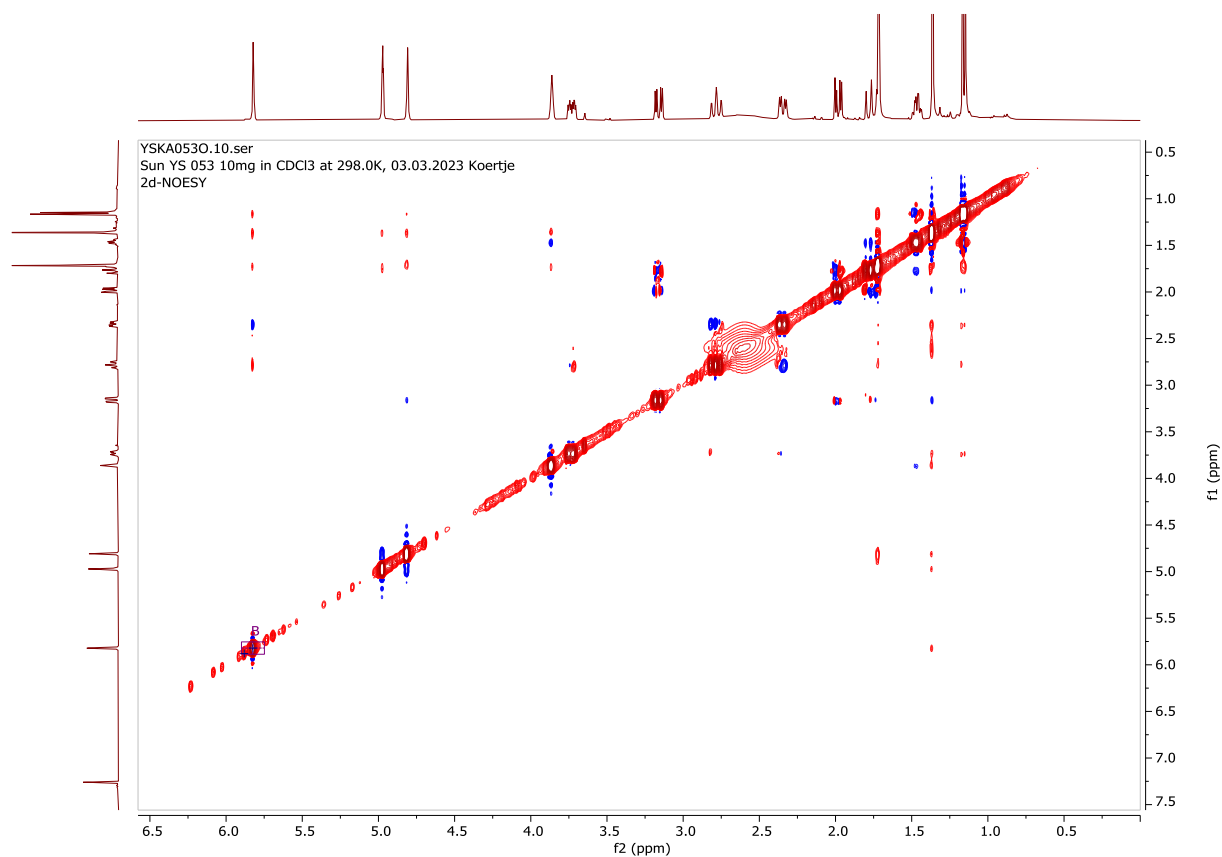

Figure S60 NOESY-spectrum of **11** recorded at 600 MHz in CDCl<sub>3</sub>

## Compound 12

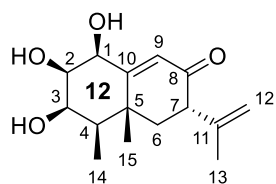

Chemical Formula: C<sub>15</sub>H<sub>22</sub>O<sub>4</sub>  
Exact Mass: 266.1518

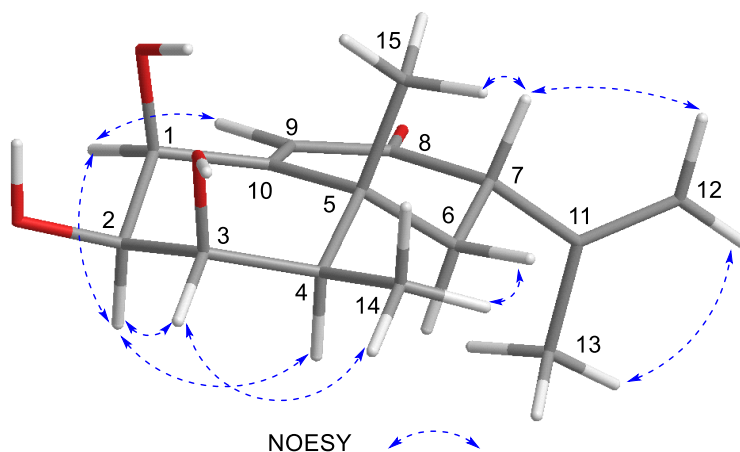

| Compound 12 |                  |                               |                                     |                  |
|-------------|------------------|-------------------------------|-------------------------------------|------------------|
| Pos.        | $\delta_c$ / ppm | $\delta_H$ / ppm (J/Hz)       | <sup>1</sup> H- <sup>1</sup> H COSY | HMBC (H-C)       |
| 1           | 79.2             | 4.32, 1H, dd (3.4, 1.5)       | 2, 3                                | 2, 3, 5, 9       |
| 2           | 72.1             | 3.6, 1H, dd (3.4, 3.4)        | 1, 3                                | 1                |
| 3           | 77.8             | 3.88, 1H, ddd (3.0, 3.0, 1.5) | 2, 4, 1                             | 1, 2, 4, 5, 14   |
| 4           | 45.9             | 1.56, 1H, m                   | 3, 14                               | 5, 6, 14, 15     |
| 5           | 38.9             |                               |                                     |                  |
| 6           | 45.6             | 1.9, 1H, m;                   | 6, 7                                | 4, 5, 7, 15      |
|             |                  | 2.02, 1H, dd (12.8, 4.5)      | 6, 7                                | 5, 7, 10, 15     |
| 7           | 52.1             | 3.35, 1H, m                   | 6                                   | 6, 8, 11, 12, 13 |
| 8           | 202.0            |                               |                                     |                  |
| 9           | 128.3            | 5.87, 1H, s                   |                                     | 1, 5, 7          |
| 10          | 168.8            |                               |                                     |                  |
| 11          | 144.8            |                               |                                     |                  |
| 12          | 114.8            | 4.82, 1H, m;                  | 12, 13                              | 7, 13            |
|             |                  | 4.93, 1H, m                   | 12, 13                              | 7, 13            |
| 13          | 20.2             | 1.69, 3H, m                   | 12                                  | 7, 11, 12        |
| 14          | 12.1             | 1.19, 3H, d (7.1)             | 4                                   | 3, 4, 5          |
| 15          | 21.4             | 1.53, 3H, s                   |                                     | 4, 5, 10         |

**Table S16** Summarized NMR signals for <sup>13</sup>C, <sup>1</sup>H, <sup>1</sup>H-<sup>1</sup>H COSY, HMBC for **12** recorded in CD<sub>3</sub>OD



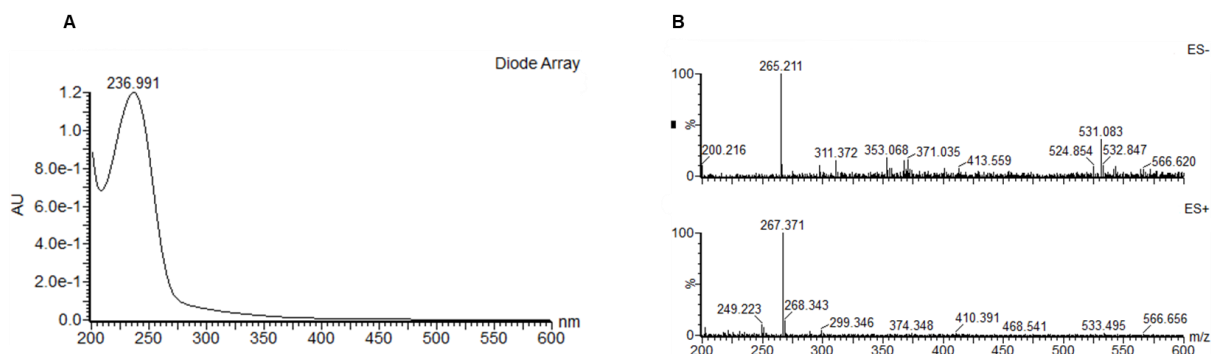

Figure S61 UV-absorption (A) and fragmentation pattern (B) of **12** in ES<sup>-</sup> TIC (bottom) and ES<sup>-</sup> TIC (top) by LR-LCMS

### Elemental Composition Report

Page 1

#### Single Mass Analysis

Tolerance = 20.0 PPM / DBE: min = -1.5, max = 50.0

Element prediction: Off

Number of isotope peaks used for i-FIT = 3

Monoisotopic Mass, Even Electron Ions

37 formula(e) evaluated with 2 results within limits (all results (up to 1000) for each mass)

Elements Used:

C: 0-90 H: 0-50 O: 0-4 Na: 0-1

Sun

QToF Premier HAB321

YS 057 503 (5.134) AM (Cen,4, 90.00, Ht,10000.0,556.28,0.70,LS 10)

1: TOF MS ES+  
1.97e+002

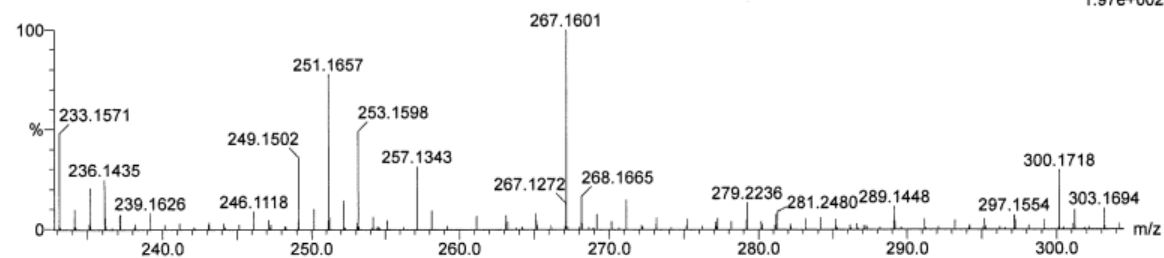

Minimum: -1.5  
Maximum: 5.0 20.0 50.0

| Mass     | Calc. Mass | mDa | PPM  | DBE | i-FIT | i-FIT (Norm) | Formula       |
|----------|------------|-----|------|-----|-------|--------------|---------------|
| 267.1601 | 267.1596   | 0.5 | 1.9  | 4.5 | 24.0  | 0.2          | C15 H23 O4    |
|          | 267.1572   | 2.9 | 10.9 | 1.5 | 25.3  | 1.6          | C13 H24 O4 Na |

Figure S62 HRMS data for **12**;  $m/z$  (M+H)<sup>+</sup> calc. mass is 267.1596, 267.1601 was found

YSHA057E.60.fid — Sun YS 057 3.5 mg in MeOD-d4 at 298.0 K 28.04.2023, Mueller — 1H-1D after all

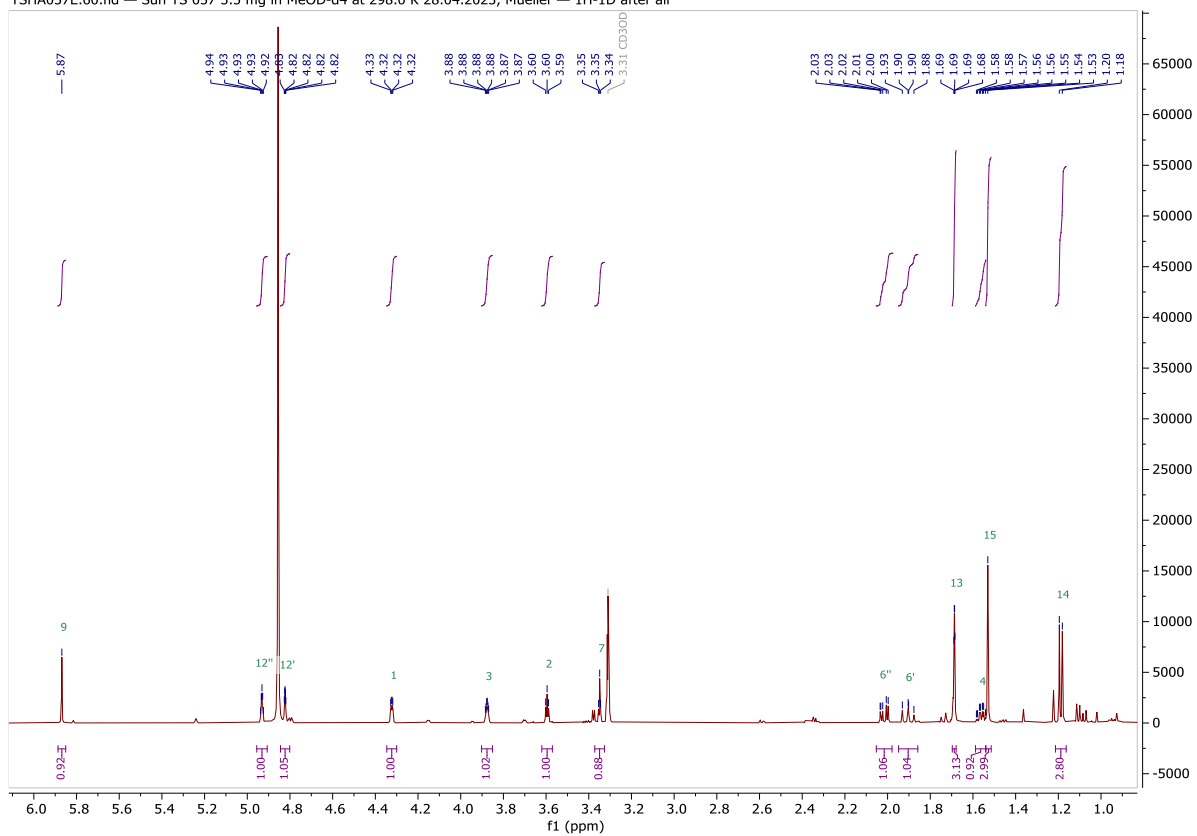

Figure S63  $^1\text{H-NMR}$  of **12** recorded at 500 MHz in  $\text{CD}_3\text{OD}$

YSCL057E.100010.fid — Sun YS 057 3.5 mg in MeOD-d4 at 298.0 K 27.04.2023, Mueller — 13C-BB

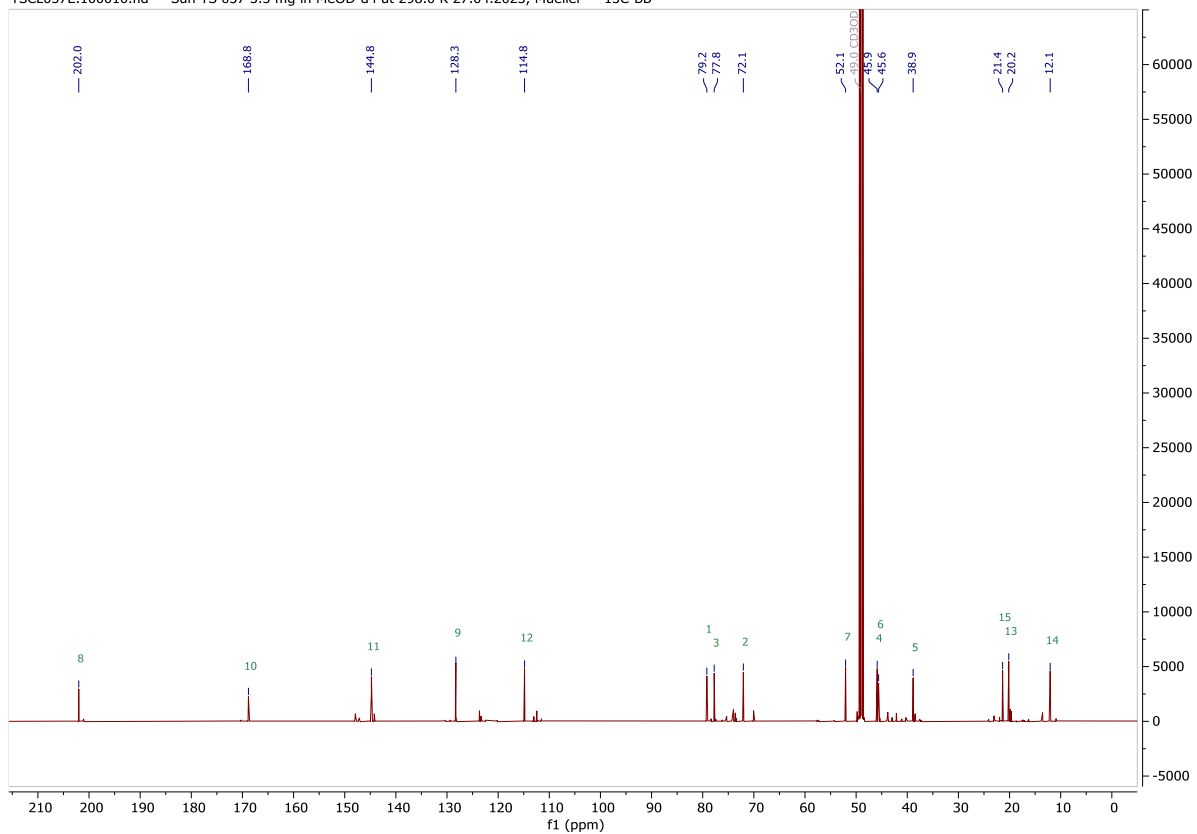

Figure S64  $^{13}\text{C-NMR}$  of **12** recorded at 125 MHz in  $\text{CD}_3\text{OD}$

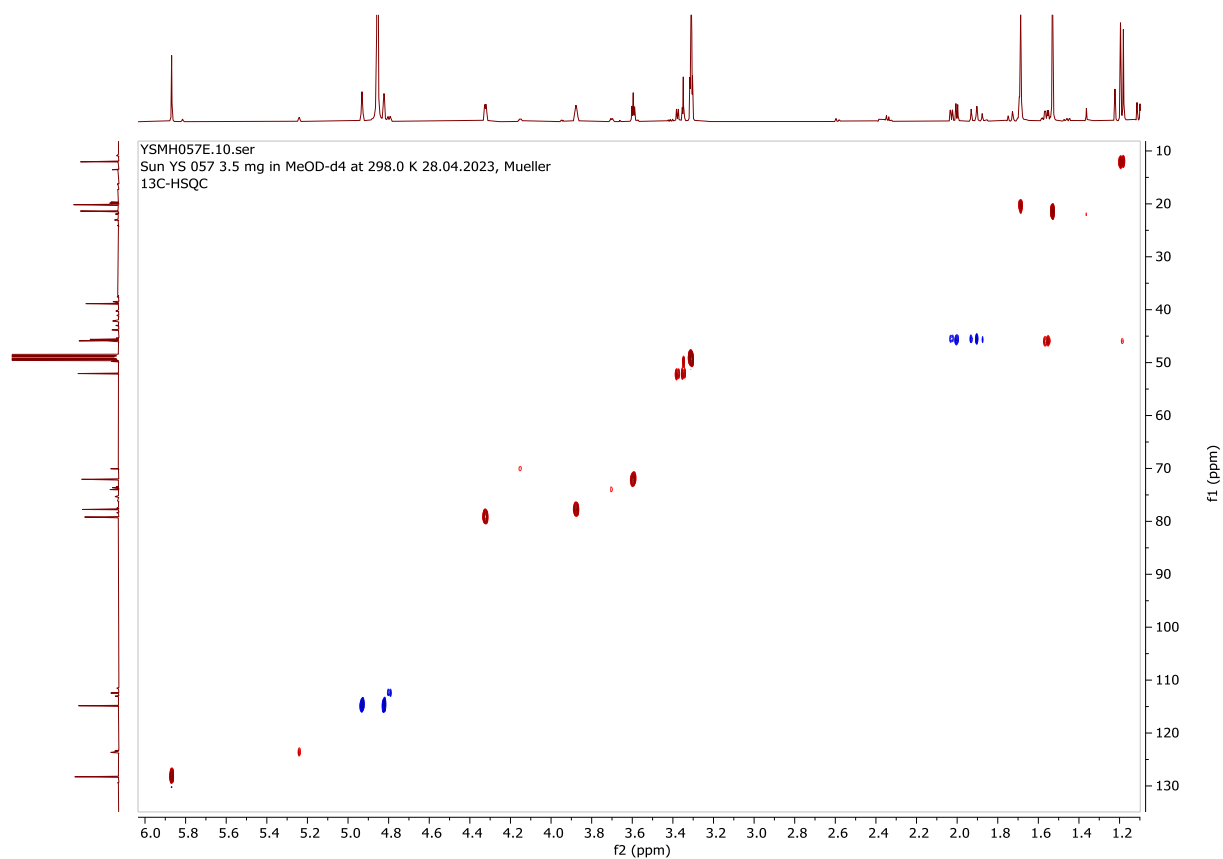

Figure S65 HSQC-spectrum of **12** recorded at 500, 125 MHz in CD<sub>3</sub>OD

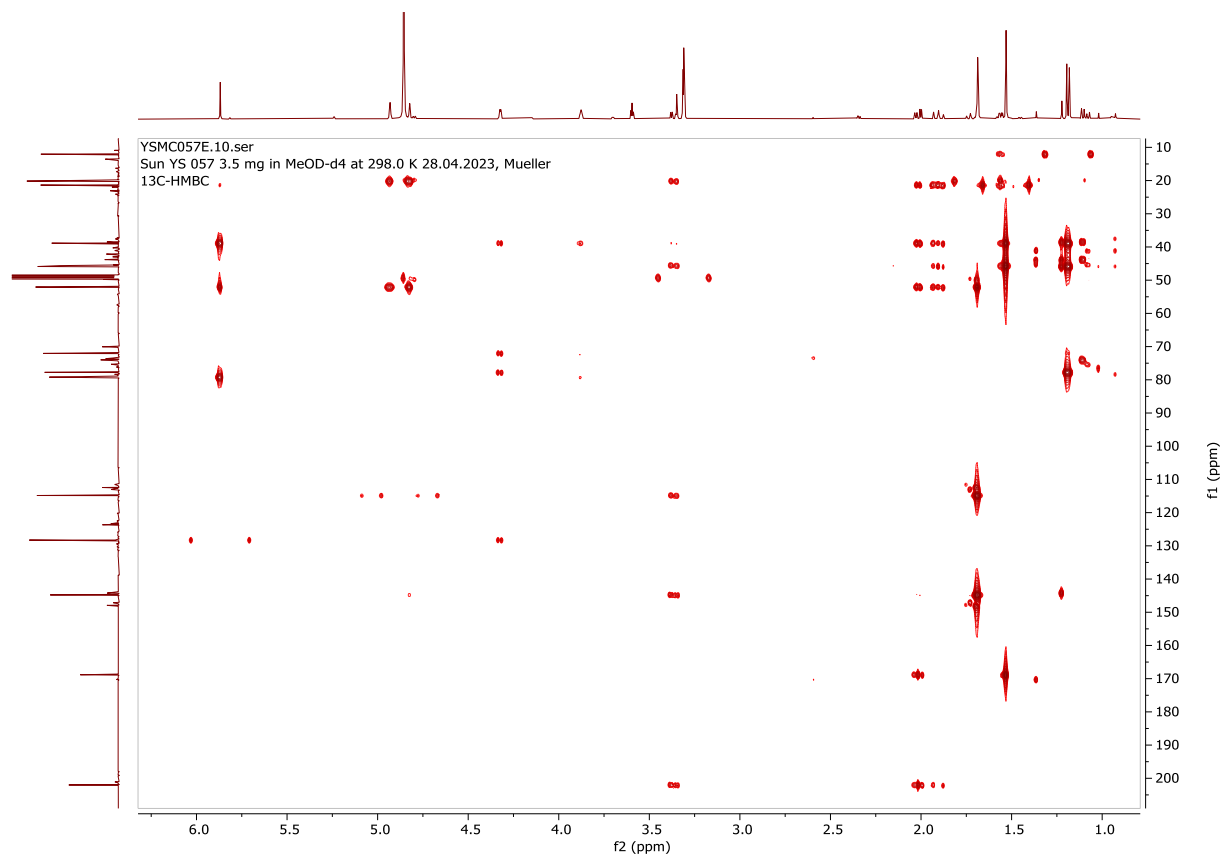

Figure S66 HMBC-spectrum of **12** recorded at 500, 125 MHz in CD<sub>3</sub>OD

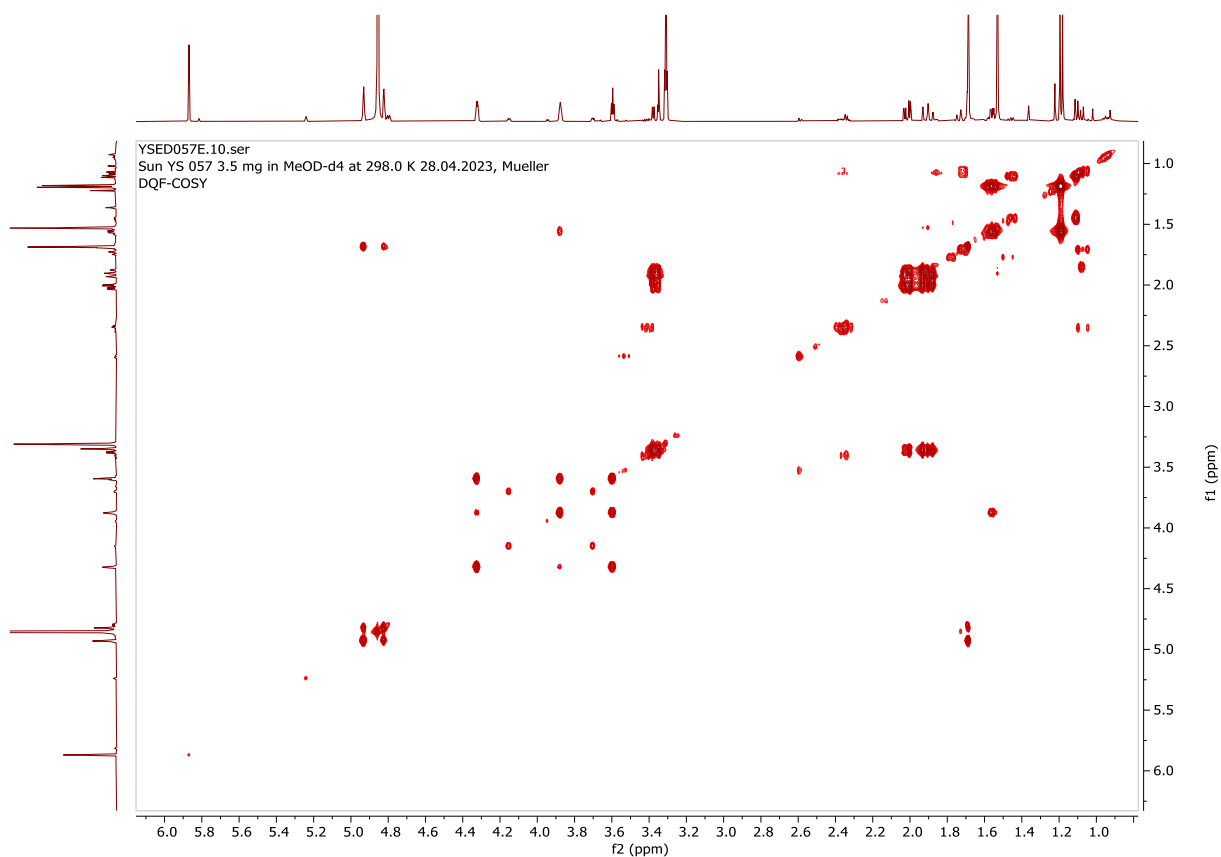

Figure S67  $^1\text{H}$ ,  $^1\text{H}$ -COSY-spectrum of **12** recorded at 500 MHz in  $\text{CD}_3\text{OD}$

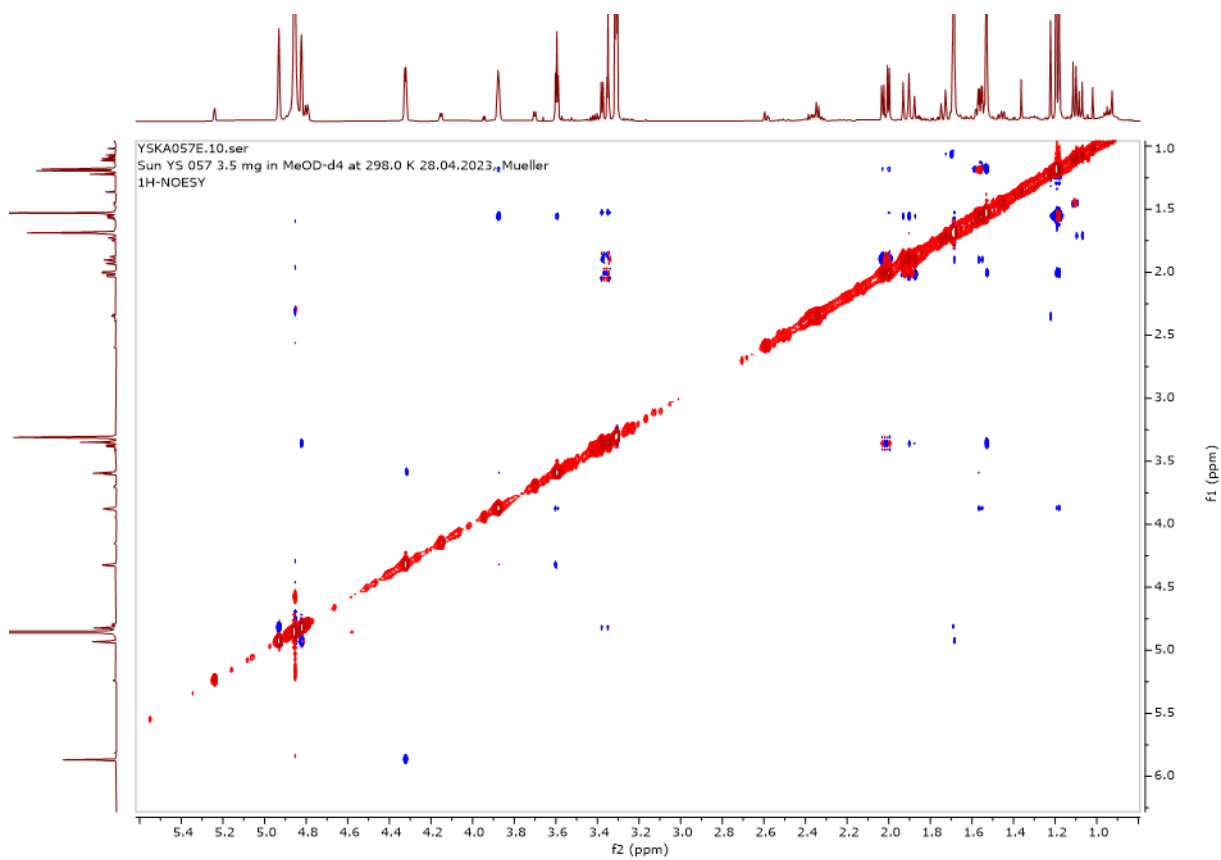

Figure S68 NOESY-spectrum of **12** recorded at 500 MHz in  $\text{CD}_3\text{OD}$

## Compound 13

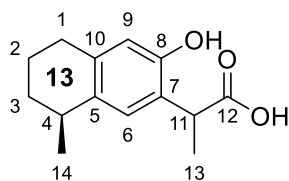

Chemical Formula: C<sub>14</sub>H<sub>18</sub>O<sub>3</sub>

Exact Mass: 234.1256

| Compound 13 |                  |                               |                                     |                |
|-------------|------------------|-------------------------------|-------------------------------------|----------------|
| Pos.        | $\delta_c$ / ppm | $\delta_H$ / ppm (J/Hz)       | <sup>1</sup> H- <sup>1</sup> H COSY | HMBC (H-C)     |
| 1           | 29.8             | 2.67, 2H, m                   | 1, 2                                | 2, 3, 5, 9, 10 |
| 2           | 20.5             | 1.68, 1H, m;                  | 2, 1, 3                             | 1, 3, 10       |
|             |                  | 1.84, 1H, m                   | 2, 1, 3                             | 1, 3, 10       |
| 3           | 31.7             | 1.49, 1H, m;                  | 3, 2, 4                             | 1, 2, 4, 14    |
|             |                  | 1.86, 1H, m                   | 3, 2, 4                             | 1, 2, 4, 14    |
| 4           | 31.9             | 2.82, 1H, m                   | 3, 14                               | 2, 3, 5, 6, 14 |
| 5           | 135.0            |                               |                                     |                |
| 6           | 128.4            | 6.97, 1H, s                   |                                     | 8, 10, 11      |
| 7           | 123.5            |                               |                                     |                |
| 8           | 151.7            |                               |                                     |                |
| 9           | 117.2            | 6.58, 1H, s                   |                                     | 1, 8, 10       |
| 10          | 137.8            |                               |                                     |                |
| 11          | 41.4             | 3.88, 1H, ddd (7.2, 7.2, 7.2) | 13                                  | 7, 8, 12, 13   |
| 12          | 181.4            |                               |                                     |                |
| 13          | 16.2             | 1.54, 3H, d (7.3)             | 11                                  | 7, 11, 12      |
| 14          | 23.1             | 1.24, 3H, d (7.0)             | 4                                   | 3, 4, 5        |

**Table S17** Summarized NMR signals for <sup>13</sup>C, <sup>1</sup>H, <sup>1</sup>H-<sup>1</sup>H COSY, HMBC for **13** recorded in CDCl<sub>3</sub>

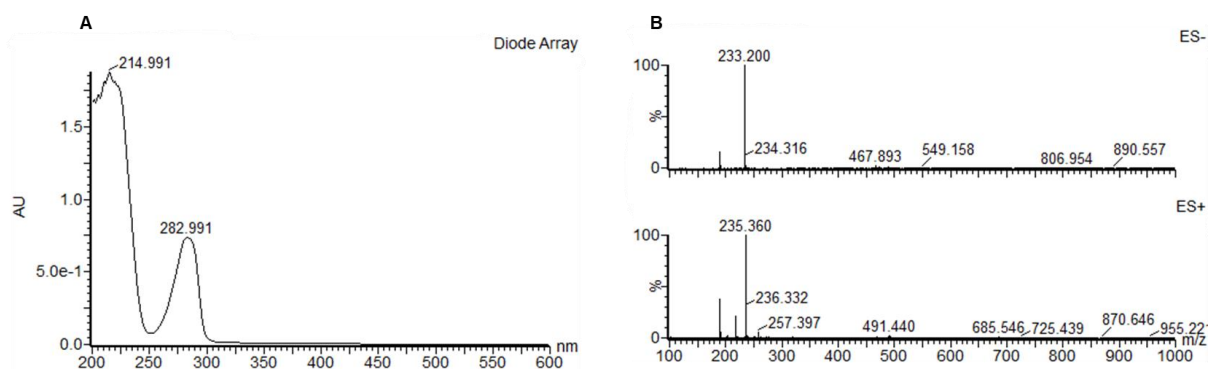

Figure S69 UV-absorption (A) and fragmentation pattern (B) of **13** in ES<sup>+</sup> TIC (bottom) and ES<sup>-</sup> TIC (top) by LR-LCMS

### Elemental Composition Report

Page 1

#### Single Mass Analysis

Tolerance = 20.0 PPM / DBE: min = -1.5, max = 50.0

Element prediction: Off

Number of isotope peaks used for i-FIT = 3

Monoisotopic Mass, Odd and Even Electron Ions

319 formula(e) evaluated with 7 results within limits (up to 30 closest results for each mass)

Elements Used:

C: 0-80 H: 0-110 N: 0-16 O: 0-10

Sun

QToF Premier HAB321

YS 026 710 (7.259) AM (Cen,3, 50.00, Ht,10000.0,556.28,0.70,LS 10)

1: TOF MS ES+  
1.57e+002

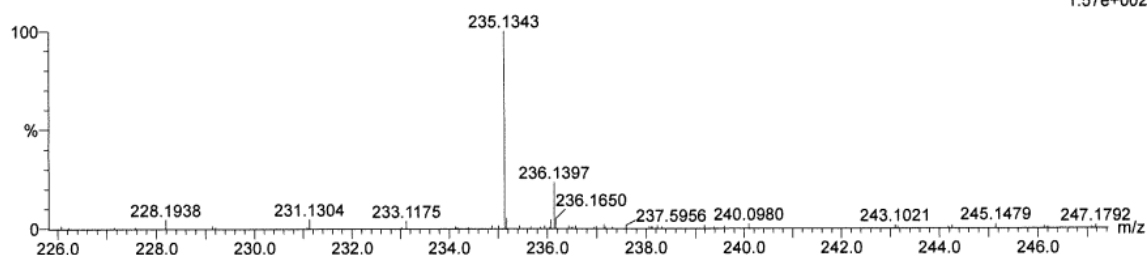

Minimum: -1.5  
Maximum: 5.0 20.0 50.0

| Mass     | Calc. Mass | mDa  | PPM   | DBE  | i-FIT | i-FIT (Norm) | Formula       |
|----------|------------|------|-------|------|-------|--------------|---------------|
| 235.1343 | 235.1334   | 0.9  | 3.8   | 5.5  | 42.0  | 1.2          | C14 H19 O3    |
|          | 235.1353   | -1.0 | -4.3  | 3.5  | 48.7  | 7.9          | H11 N16       |
|          | 235.1361   | -1.8 | -7.7  | 10.0 | 41.3  | 0.5          | C17 H17 N     |
|          | 235.1321   | 2.2  | 9.4   | 6.0  | 43.4  | 2.6          | C12 H17 N3 O2 |
|          | 235.1366   | -2.3 | -9.8  | 3.0  | 47.1  | 6.3          | C2 H13 N13 O  |
|          | 235.1307   | 3.6  | 15.3  | 6.5  | 45.0  | 4.2          | C10 H15 N6 O  |
|          | 235.1379   | -3.6 | -15.3 | 2.5  | 46.5  | 5.6          | C4 H15 N10 O2 |

Figure S70 HRMS data for **13**;  $m/z$  (M+H)<sup>+</sup> calc. mass is 235.1334, 235.1343 was found

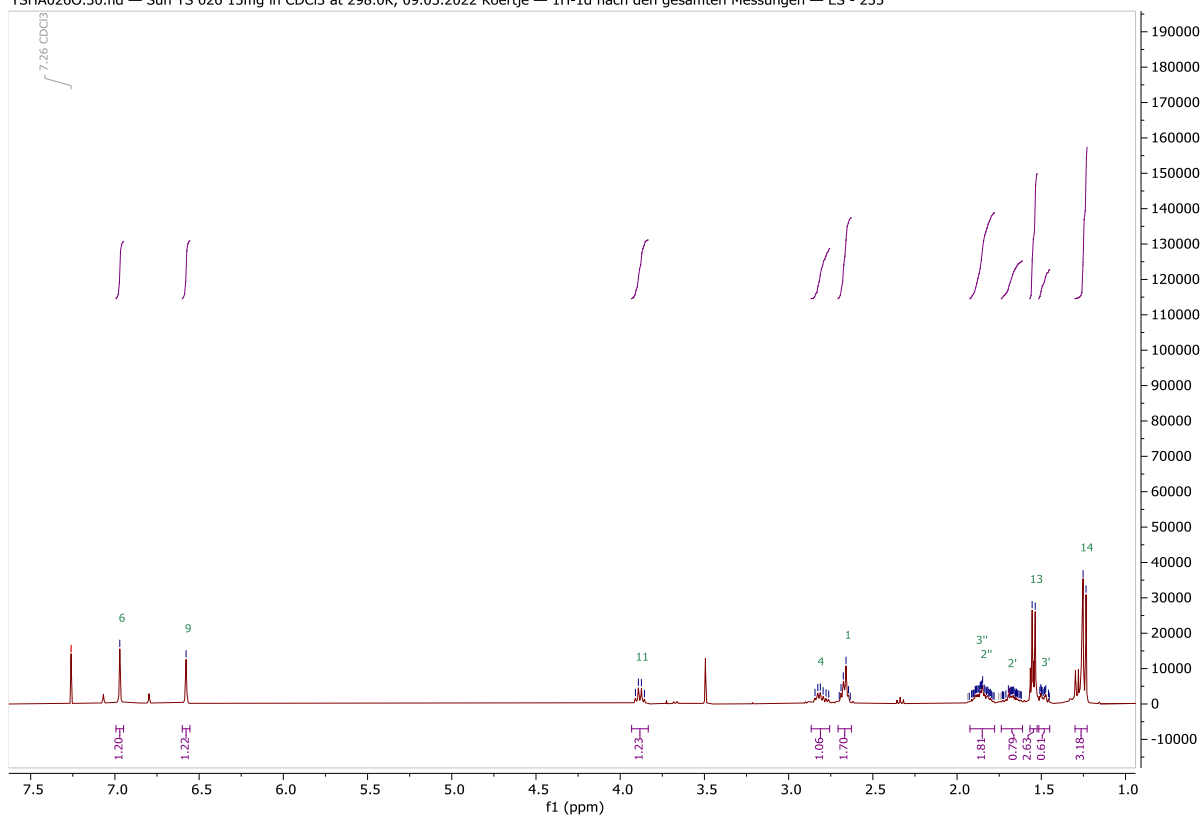

Figure S71 <sup>1</sup>H-NMR of **13** recorded at 400 MHz in CDCl<sub>3</sub>

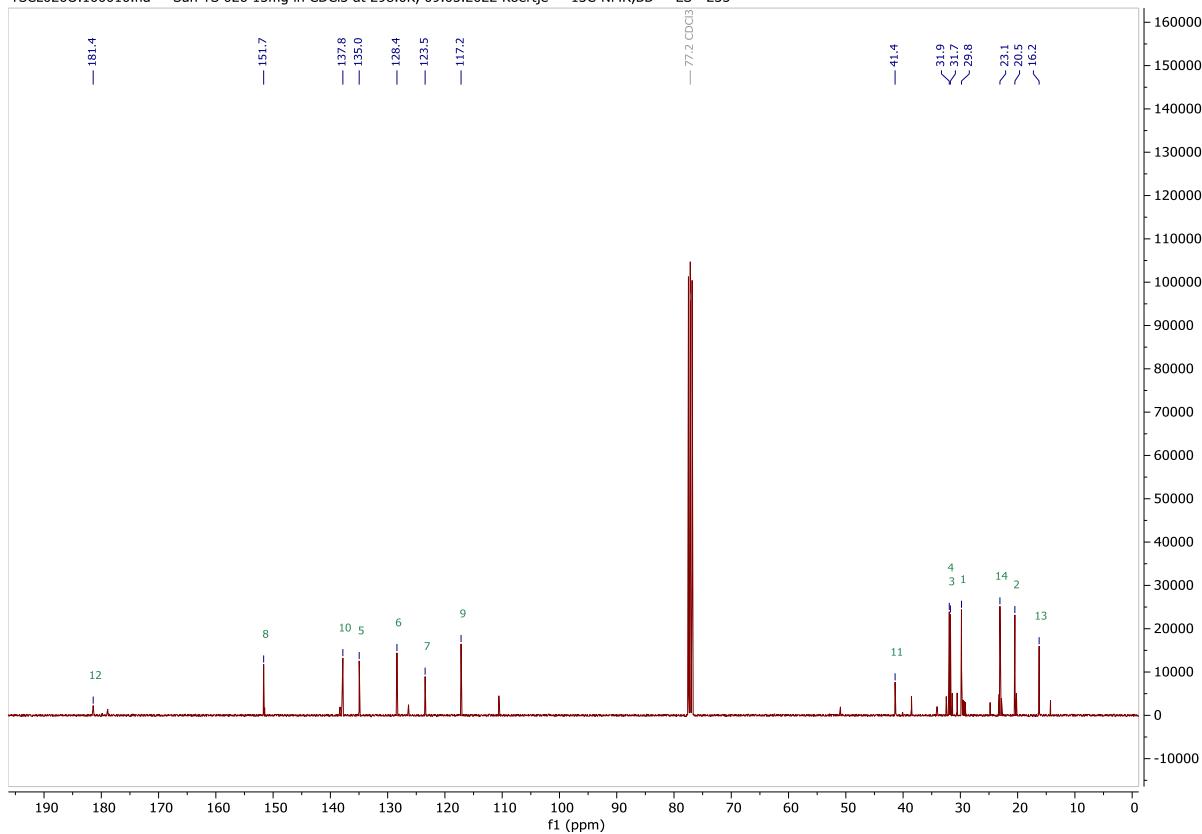

Figure S72 <sup>13</sup>C-NMR of **13** recorded at 100 MHz in CDCl<sub>3</sub>

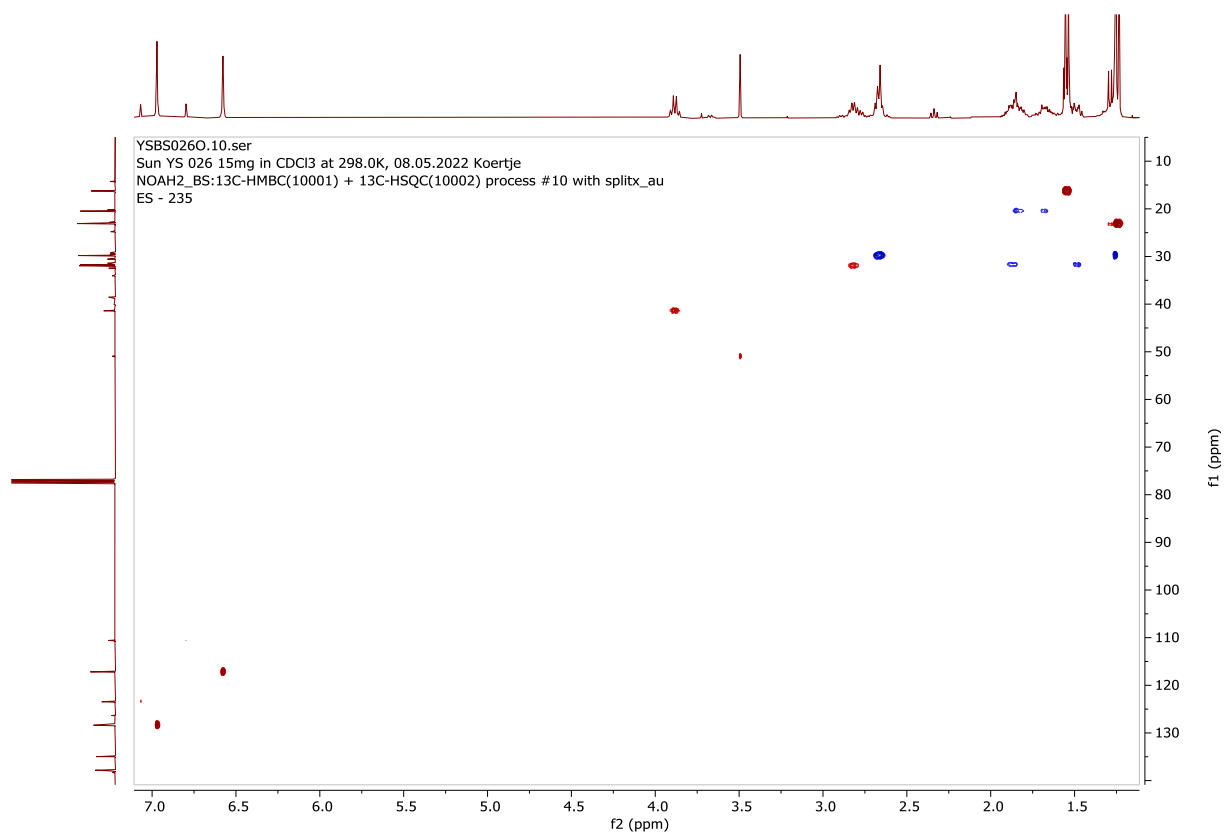

**Figure S73** HSQC-spectrum of **13** recorded at 400, 100 MHz in CDCl<sub>3</sub>

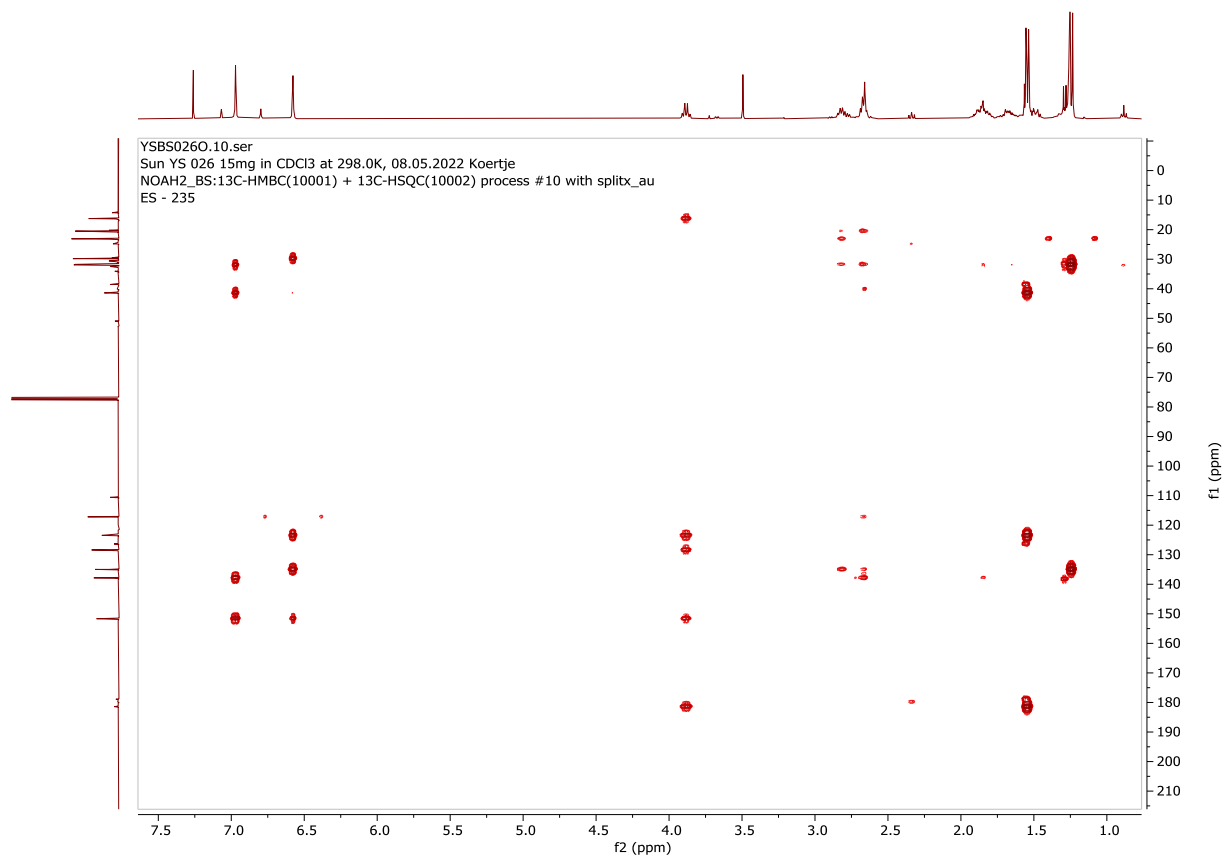

**Figure S74** HMBC-spectrum of **13** recorded at 400, 100 MHz in CDCl<sub>3</sub>



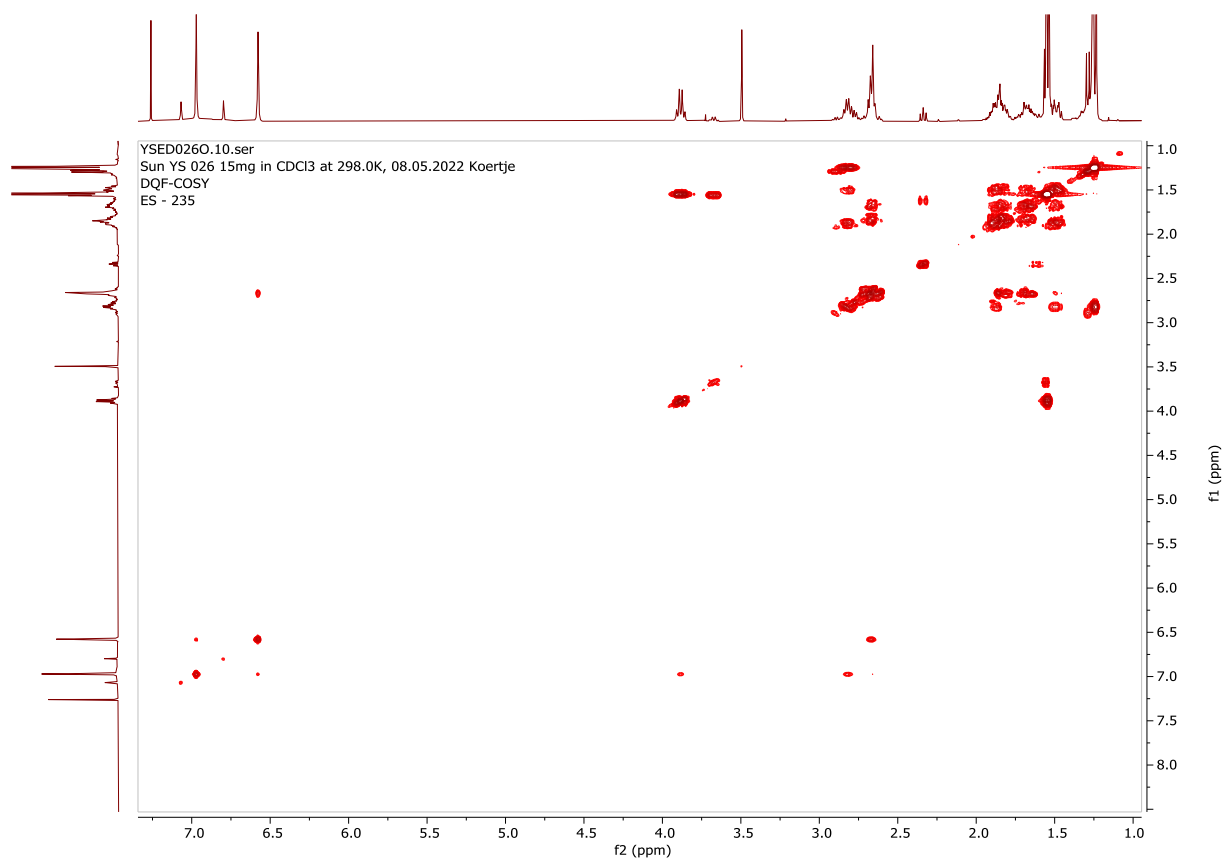

Figure S75 <sup>1</sup>H, <sup>1</sup>H-COSY-spectrum of **13** recorded at 400 MHz in CDCl<sub>3</sub>

## Compound 14

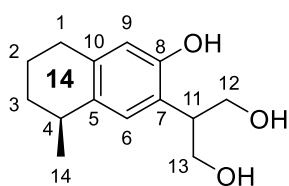

Chemical Formula: C<sub>14</sub>H<sub>20</sub>O<sub>3</sub>  
Exact Mass: 236.1412

| Compound 14 |                  |                                     |                                     |                    |
|-------------|------------------|-------------------------------------|-------------------------------------|--------------------|
| Pos.        | $\delta_C$ / ppm | $\delta_H$ / ppm (J/Hz)             | <sup>1</sup> H- <sup>1</sup> H COSY | HMBC (H-C)         |
| 1           | 30.8             | 2.62, 2H, m                         | 1, 2                                | 2, 3, 5, 9, 10     |
| 2           | 21.6             | 1.66, 1H, m;                        | 2, 1, 3                             | 1, 3, 10           |
|             |                  | 1.82, 1H, m                         | 2, 1, 3                             | 1, 3, 10           |
| 3           | 33.1             | 1.47, 1H, m;                        | 3, 2, 4                             | 1, 2, 4, 5, 14     |
|             |                  | 1.87, 1H, m                         | 3, 2, 4                             | 1, 2, 4, 5, 14     |
| 4           | 33.1             | 2.78, 1H, m                         | 3, 14                               | 2, 3, 5, 6, 10, 14 |
| 5           | 134.1            |                                     |                                     |                    |
| 6           | 129.7            | 6.91, 1H, s                         |                                     | 1, 4, 8, 9, 10, 11 |
| 7           | 125.6            |                                     |                                     |                    |
| 8           | 154.1            |                                     |                                     |                    |
| 9           | 116.2            | 6.45, 1H, s                         |                                     | 1, 5, 7, 8, 11     |
| 10          | 136.9            |                                     |                                     |                    |
| 11          | 46.4             | 3.22, 1H, dddd (6.4, 6.4, 6.4, 6.4) | 12, 13                              | 6, 7, 8, 12, 13    |
| 12          | 64.1             | 3.86, 2H, m;                        | 12, 11                              | 7, 11, 13          |
| 13          | 64.0             | 3.86, 2H, m                         | 13, 11                              | 7, 11, 12          |
| 14          | 23.5             | 1.23, 3H, d (7.0)                   | 4                                   | 3, 4, 5            |

**Table S18** Summarized NMR signals for <sup>13</sup>C, <sup>1</sup>H, <sup>1</sup>H-<sup>1</sup>H COSY, HMBC for **14** recorded in CD<sub>3</sub>OD

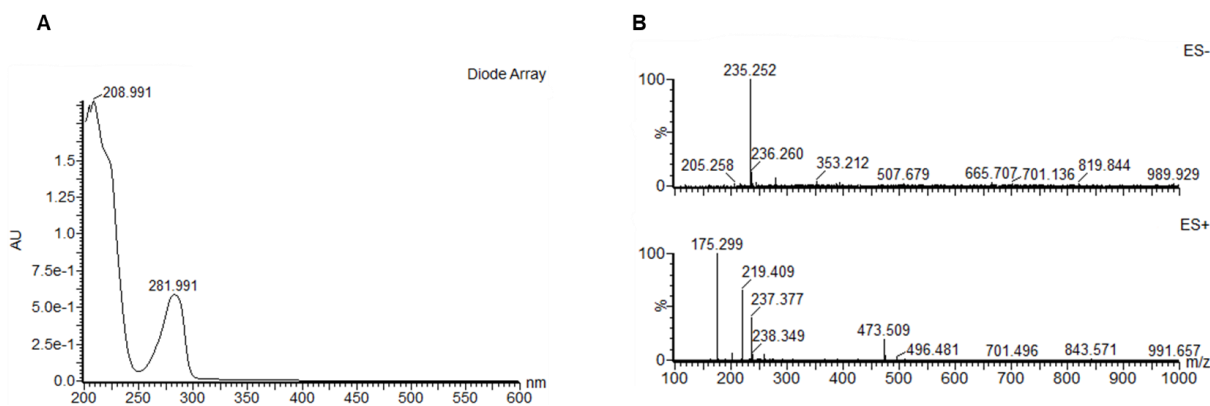

Figure S76 UV-absorption (A) and fragmentation pattern (B) of 14 in ES<sup>-</sup> TIC (bottom) and ES<sup>+</sup> TIC (top) by LR-LCMS

### Elemental Composition Report

Page 1

#### Single Mass Analysis

Tolerance = 20.0 PPM / DBE: min = -1.5, max = 50.0

Element prediction: Off

Number of isotope peaks used for i-FIT = 3

Monoisotopic Mass, Odd and Even Electron Ions

769 formula(e) evaluated with 12 results within limits (all results (up to 1000) for each mass)

Elements Used:

C: 0-95 H: 0-132 N: 0-9 O: 0-24 S: 0-4

Sun

QToF Premier HAB321

YS 051 624 (6.361) AM (Cen,4, 70.00, Ht,10000.0,554.26,0.70,LS 10)

1: TOF MS ES-  
1.73e+002

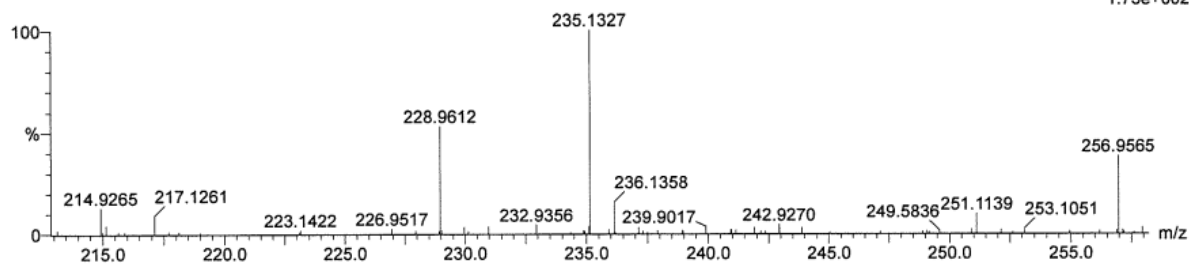

Minimum:

Maximum: 5.0 20.0 -1.5

| Mass     | Calc. Mass | mDa  | PPM   | DBE | i-FIT | i-FIT (Norm) | Formula        |
|----------|------------|------|-------|-----|-------|--------------|----------------|
| 235.1327 | 235.1328   | -0.1 | -0.4  | 2.0 | 14.9  | 4.2          | C5 H17 N9 S    |
|          | 235.1321   | 0.6  | 2.6   | 6.0 | 11.8  | 1.1          | C12 H17 N3 O2  |
|          | 235.1334   | -0.7 | -3.0  | 5.5 | 11.6  | 0.9          | C14 H19 O3     |
|          | 235.1341   | -1.4 | -6.0  | 1.5 | 14.6  | 3.9          | C7 H19 N6 O S  |
|          | 235.1307   | 2.0  | 8.5   | 6.5 | 12.9  | 2.2          | C10 H15 N6 O   |
|          | 235.1303   | 2.4  | 10.2  | 0.5 | 18.0  | 7.3          | C10 H23 N2 S2  |
|          | 235.1354   | -2.7 | -11.5 | 1.0 | 15.0  | 4.2          | C9 H21 N3 O2 S |

Figure S77 HRMS data for 14; m/z (M-H)<sup>-</sup> calc. mass is 235.1334, 235.1327 was found

YSVA051X.1.fid — Yunlong, YS 051, 4 mg in MeOD, 298 K, 29.08.22, Bauer — 1H 1D

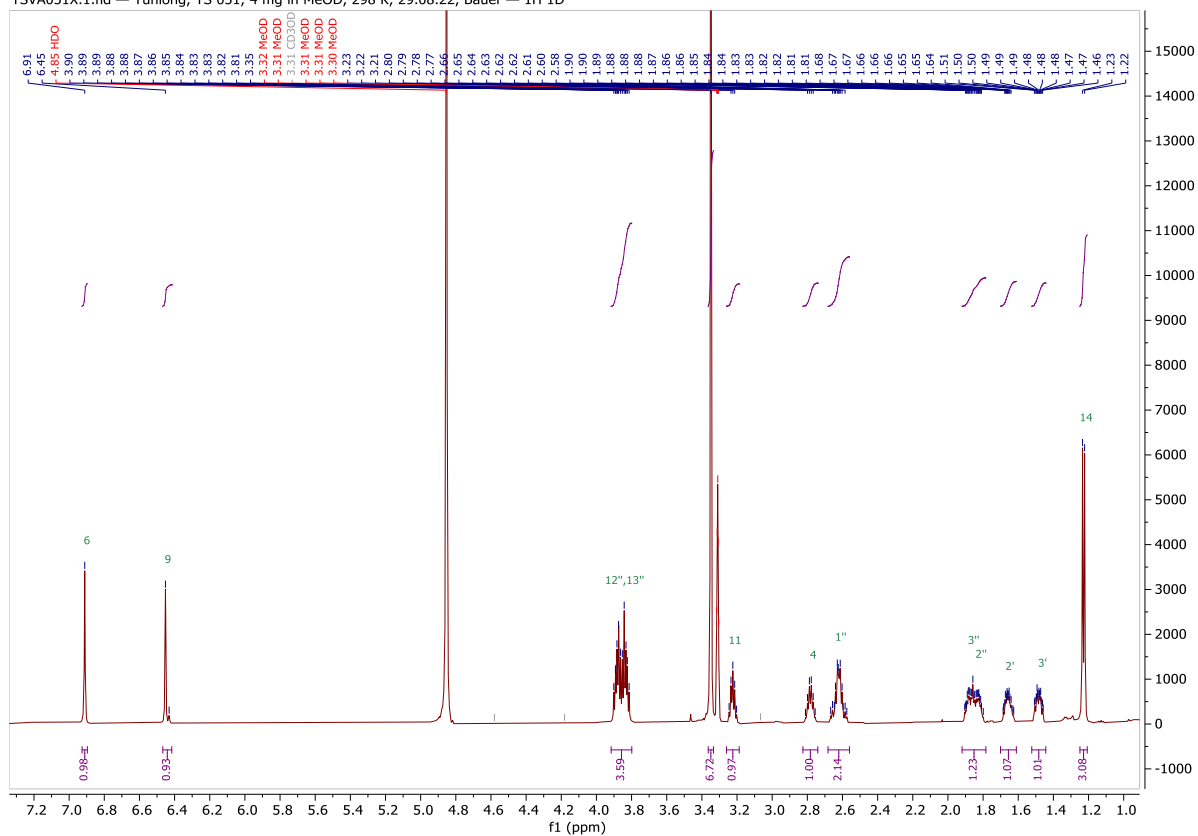

Figure S78 <sup>1</sup>H-NMR of **14** recorded at 600 MHz in CD<sub>3</sub>OD

YSVA051X.5.fid — Yunlong, YS 051, 4 mg in MeOD, 298 K, 29.08.22, Bauer — 13C BB

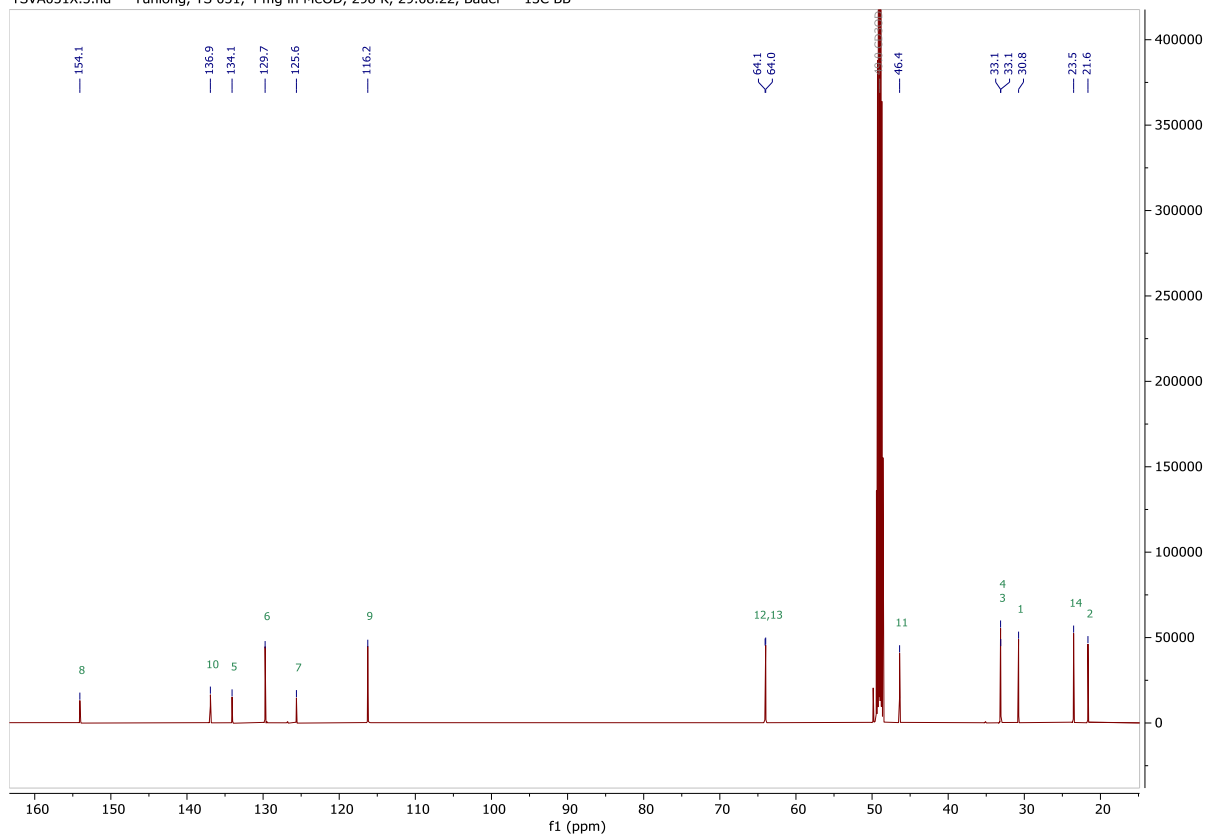

Figure S79 <sup>13</sup>C-NMR of **14** recorded at 150 MHz in CD<sub>3</sub>OD

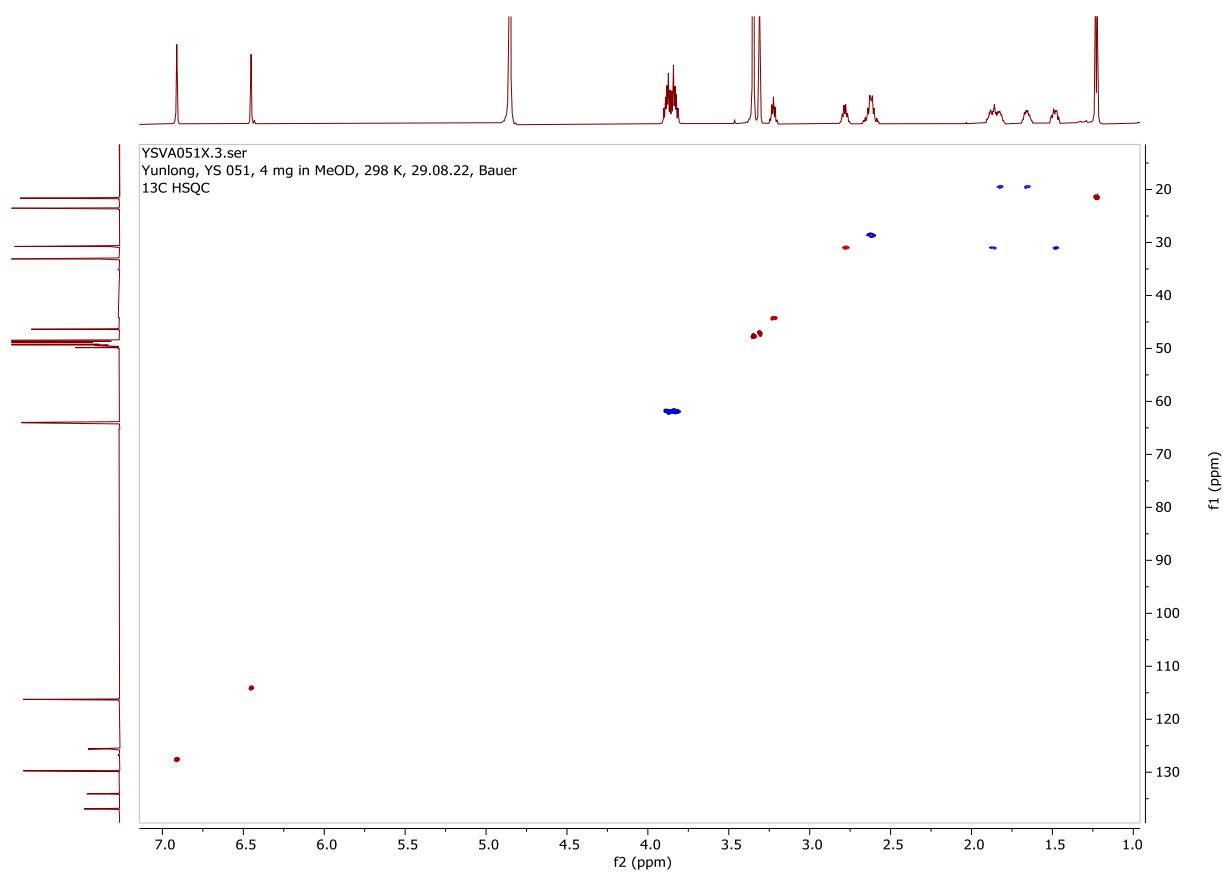

Figure S80 HSQC-spectrum of **14** recorded at 600, 150 MHz in CD<sub>3</sub>OD

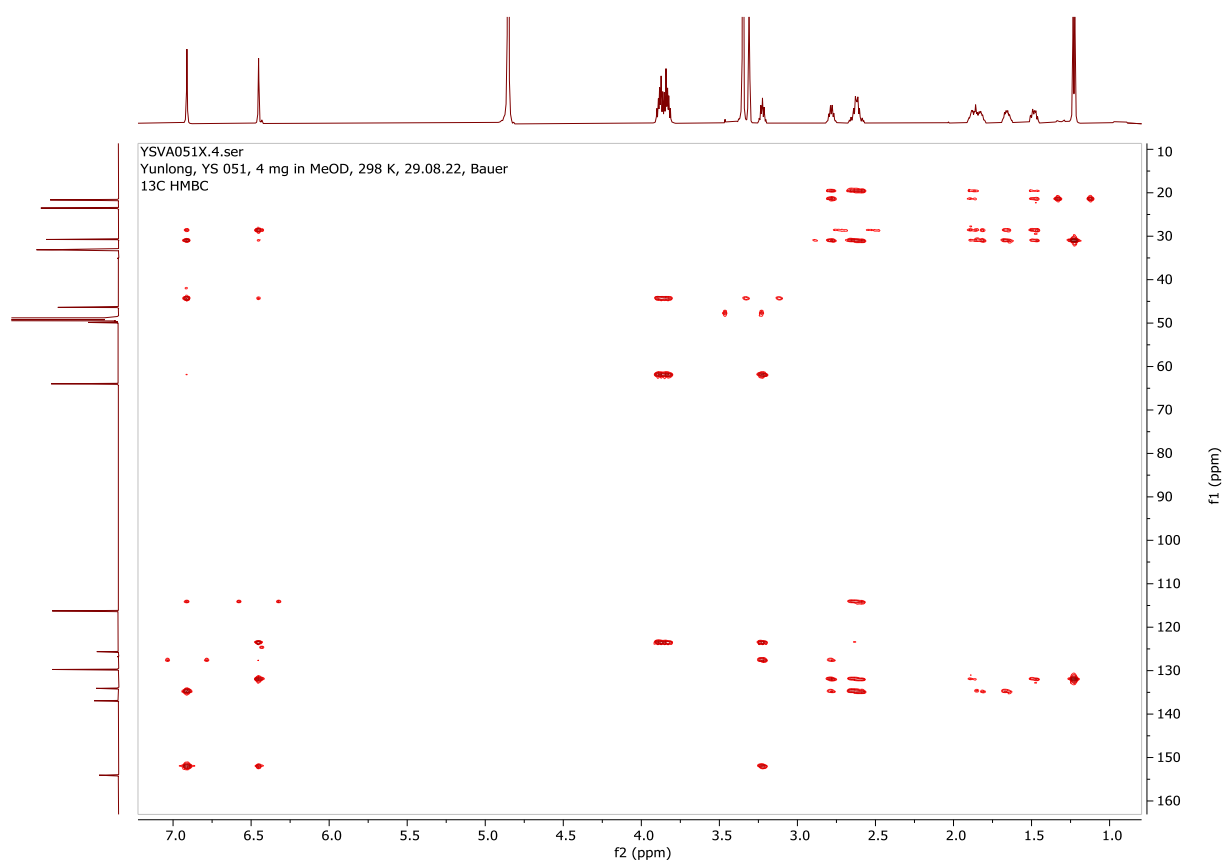

Figure S81 HMBC-spectrum of **14** recorded at 600, 150 MHz in CD<sub>3</sub>OD

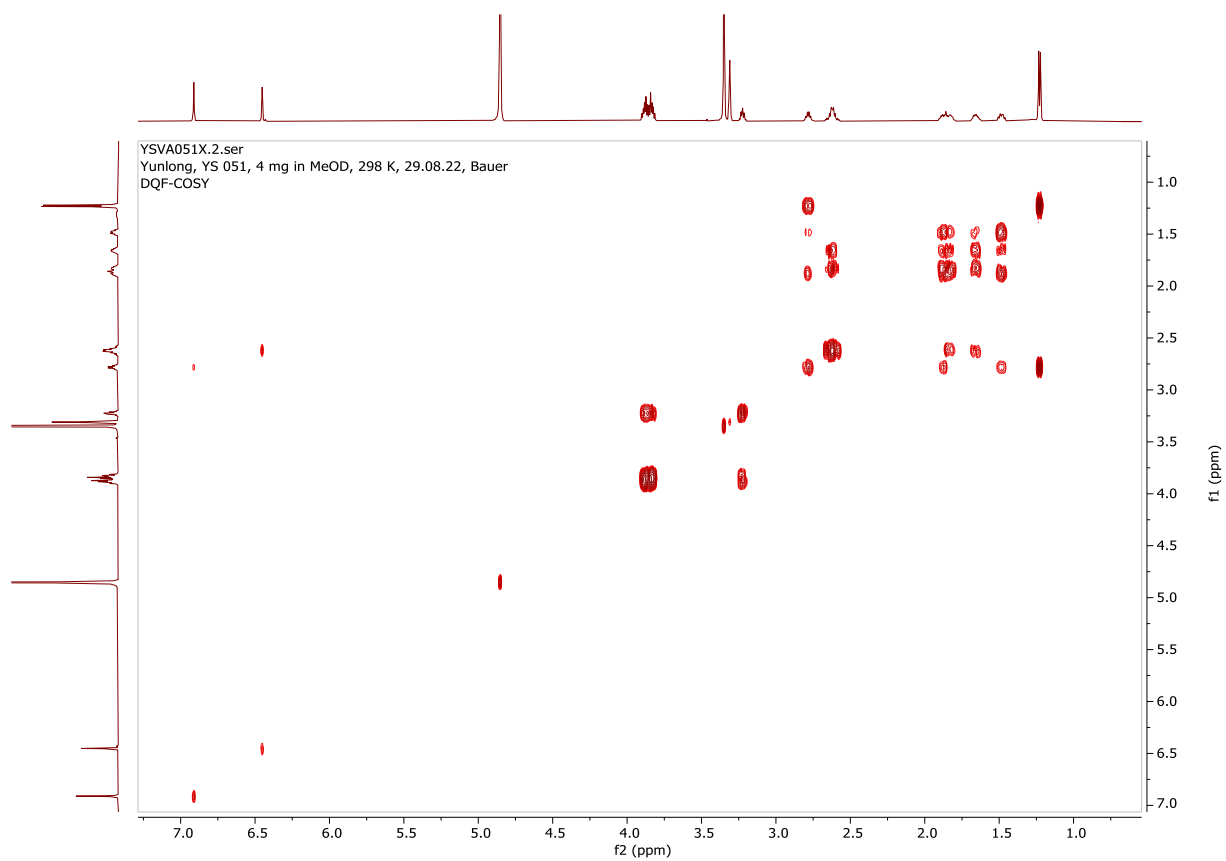

**Figure S82**  $^1\text{H}$ ,  $^1\text{H}$ -COSY-spectrum of **14** recorded at 600 MHz in  $\text{CD}_3\text{OD}$

## Compound 15

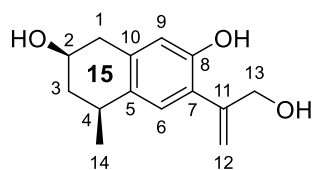

Chemical Formula: C<sub>14</sub>H<sub>18</sub>O<sub>3</sub>  
Exact Mass: 234.1256

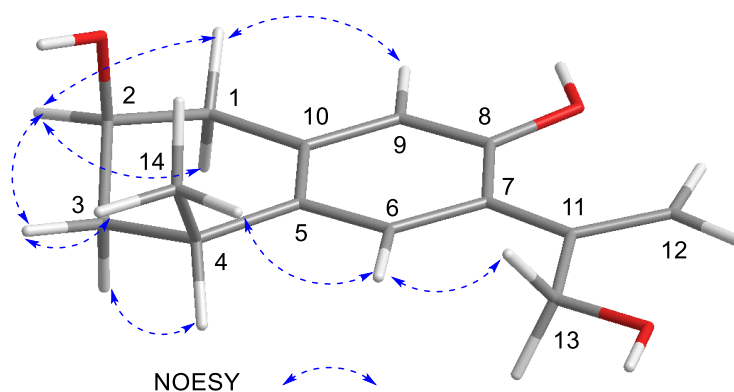

| Compound 15 |                  |                                      |                                     |                |
|-------------|------------------|--------------------------------------|-------------------------------------|----------------|
| Pos.        | $\delta_C$ / ppm | $\delta_H$ / ppm (J/Hz)              | <sup>1</sup> H- <sup>1</sup> H COSY | HMBC (H-C)     |
| 1           | 40.4             | 2.59, 1H, dd (15.5, 10.3);           | 1, 2                                | 2, 3, 5, 9, 10 |
|             |                  | 2.9, 1H, ddd (15.6, 5.3, 2.4)        | 1, 2, 3                             | 2, 3, 5, 9, 10 |
| 2           | 68.3             | 3.9, 1H, m                           | 1, 3                                |                |
| 3           | 43.5             | 1.33, 1H, m;                         | 3, 2, 4                             | 1, 2, 4, 5, 14 |
|             |                  | 2.14, 1H, dddd (11.9, 5.8, 3.5, 2.4) | 3, 2, 4, 1                          | 1, 2, 4, 5     |
| 4           | 33.3             | 2.86, 1H, m                          | 3, 14                               | 3, 5, 14       |
| 5           | 132.7            |                                      |                                     |                |
| 6           | 129.2            | 7.02, 1H, s                          |                                     | 4, 8, 10, 11   |
| 7           | 127.2            |                                      |                                     |                |
| 8           | 153.5            |                                      |                                     |                |
| 9           | 116.5            | 6.48, 1H, s                          |                                     | 1, 5, 7, 8     |
| 10          | 136.6            |                                      |                                     |                |
| 11          | 149.6            |                                      |                                     |                |
| 12          | 114.4            | 5.15, 1H, m;                         | 12, 13                              | 7, 11, 13      |
|             |                  | 5.35, 1H, m                          | 12, 13                              | 7, 11, 13      |
| 13          | 65.9             | 4.35, 2H, m                          | 12                                  | 7, 11, 12      |
| 14          | 22.4             | 1.3, 3H, d (6.8)                     | 4                                   | 3, 4, 5        |

Table S19 Summarized NMR signals for <sup>13</sup>C, <sup>1</sup>H, <sup>1</sup>H-<sup>1</sup>H COSY, HMBC for 15 recorded in CD<sub>3</sub>OD

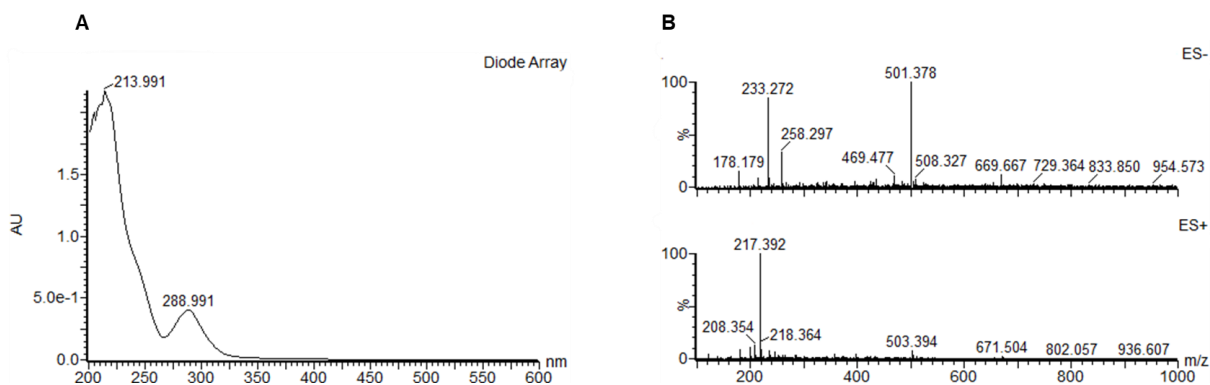

Figure S83 UV-absorption (A) and fragmentation pattern (B) of **15** in ES<sup>+</sup> TIC (bottom) and ES<sup>-</sup> TIC (top) by LR-LCMS

### Elemental Composition Report

Page 1

#### Single Mass Analysis

Tolerance = 20.0 PPM / DBE: min = -1.5, max = 50.0

Element prediction: Off

Number of isotope peaks used for i-FIT = 3

Monoisotopic Mass, Odd and Even Electron Ions

366 formula(e) evaluated with 7 results within limits (all results (up to 1000) for each mass)

Elements Used:

C: 0-55 H: 0-65 N: 0-4 O: 0-11 S: 0-2

Sun

QToF Premier HAB321

YS 052 503 (5.144) AM (Cen.4, 70.00, Ht,10000.0,554.26,0.70,LS 10)

1: TOF MS ES-  
1.50e+002

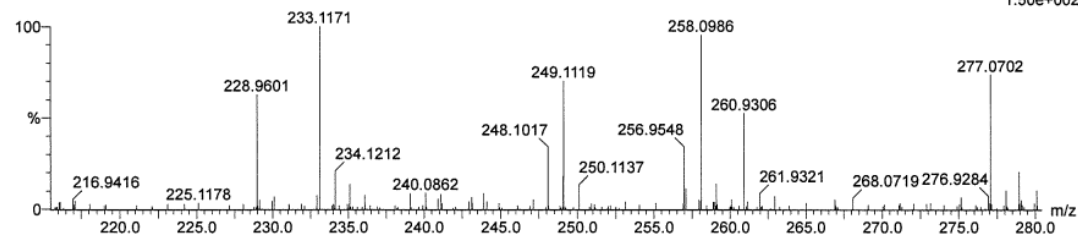

Minimum: -1.5  
Maximum: 50.0

| Mass     | Calc. Mass | mDa  | PPM   | DBE  | i-FIT | i-FIT (Norm) | Formula        |
|----------|------------|------|-------|------|-------|--------------|----------------|
| 233.1171 | 233.1178   | -0.7 | -3.0  | 6.5  | 38.3  | 2.3          | C14 H17 O3     |
|          | 233.1164   | 0.7  | 3.0   | 7.0  | 38.6  | 2.6          | C12 H15 N3 O2  |
|          | 233.1146   | 2.5  | 10.7  | 1.5  | 36.6  | 0.6          | C10 H21 N2 S2  |
|          | 233.1198   | -2.7 | -11.6 | 2.0  | 38.6  | 2.6          | C9 H19 N3 O2 S |
|          | 233.1204   | -3.3 | -14.2 | 11.0 | 38.1  | 2.1          | C17 H15 N      |
|          | 233.1137   | 3.4  | 14.6  | 2.5  | 40.3  | 4.2          | C9 H17 N2 O5   |
|          | 233.1211   | -4.0 | -17.2 | 1.5  | 38.6  | 2.6          | C11 H21 O3 S   |

Figure S84 HRMS data for **15**;  $m/z$  (M-H)<sup>-</sup> calc. mass is 233.1178, 233.1171 was found



YS052.8.fid — Yunlong, YS052, 5 mg in MeOD, 298 K, 28.09.22, Araf — 1H 1D presat

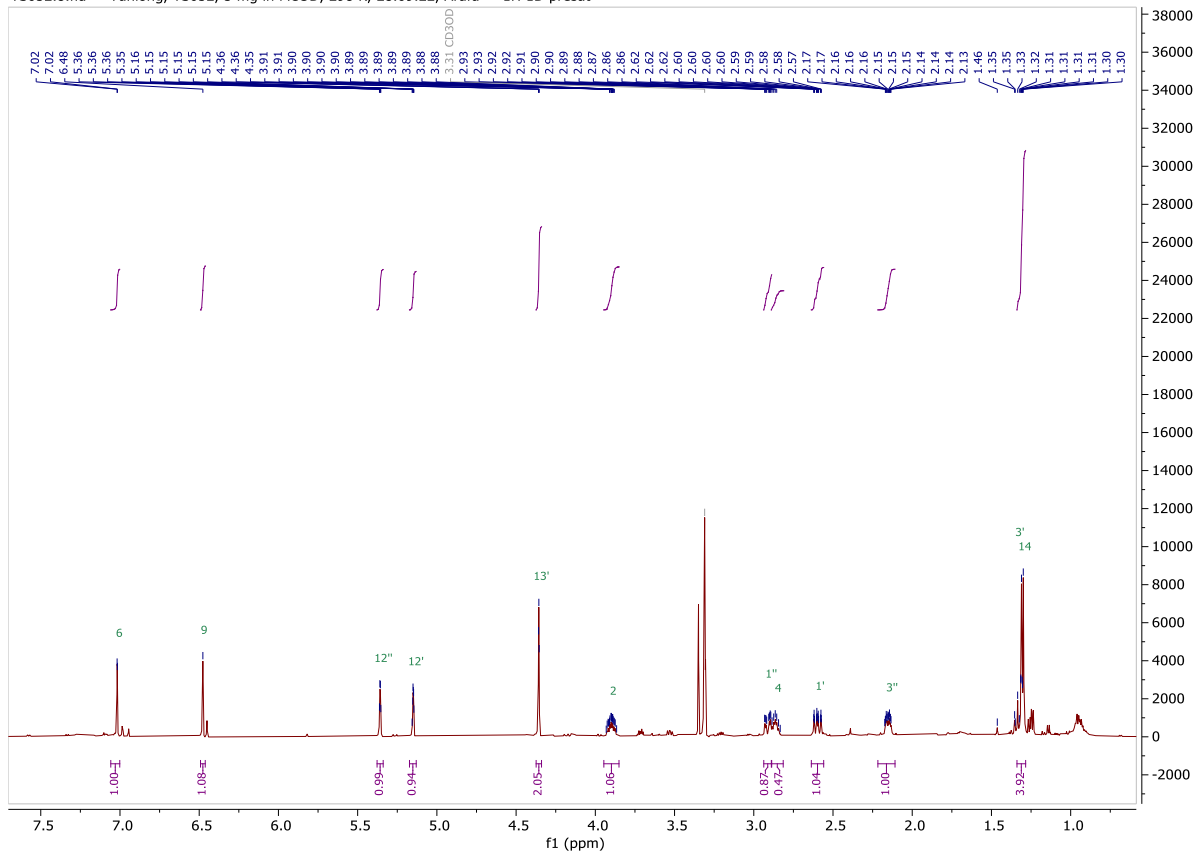

Figure S85 <sup>1</sup>H-NMR of **15** recorded at 600 MHz in CD<sub>3</sub>OD

YS052.5000.fid — Yunlong, YS052, 5 mg in MeOD, 298 K, 28.09.22, Araf — <sup>13</sup>C BB

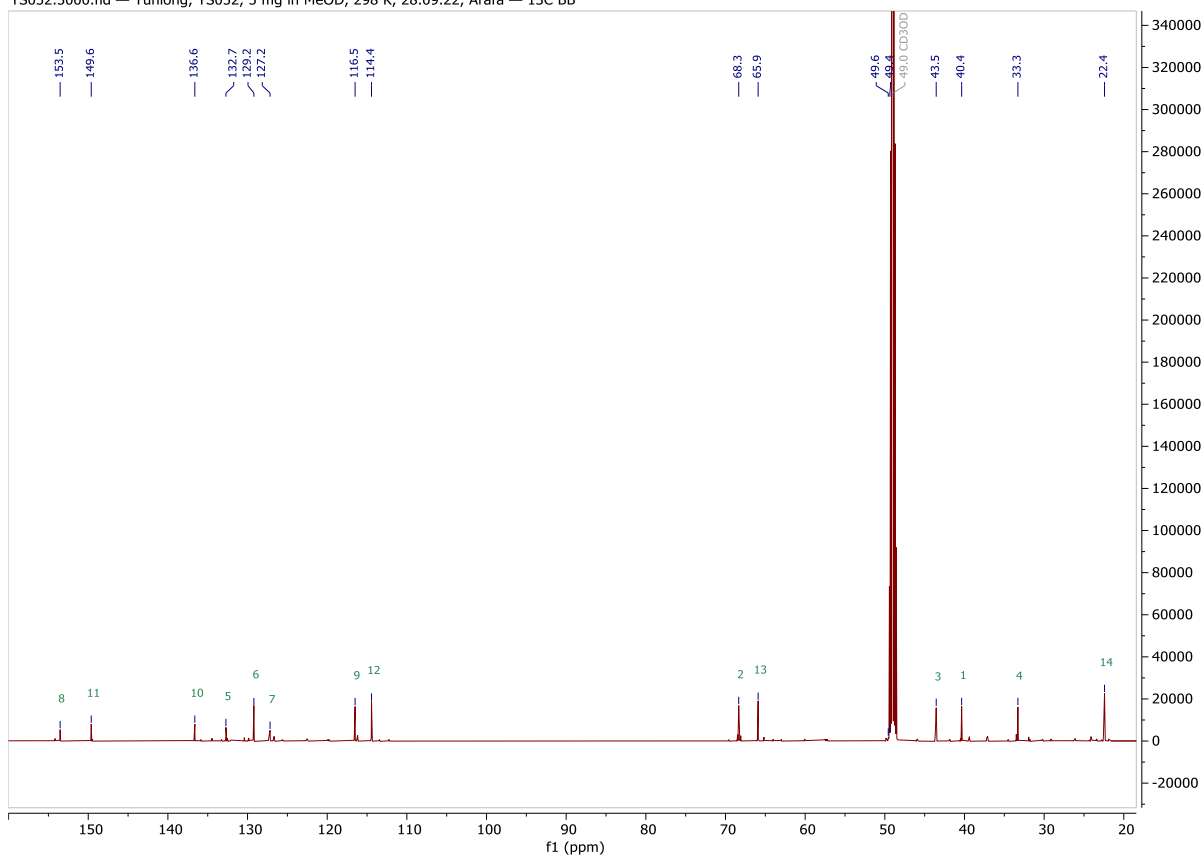

Figure S86 <sup>13</sup>C-NMR of **15** recorded at 150 MHz in CD<sub>3</sub>OD

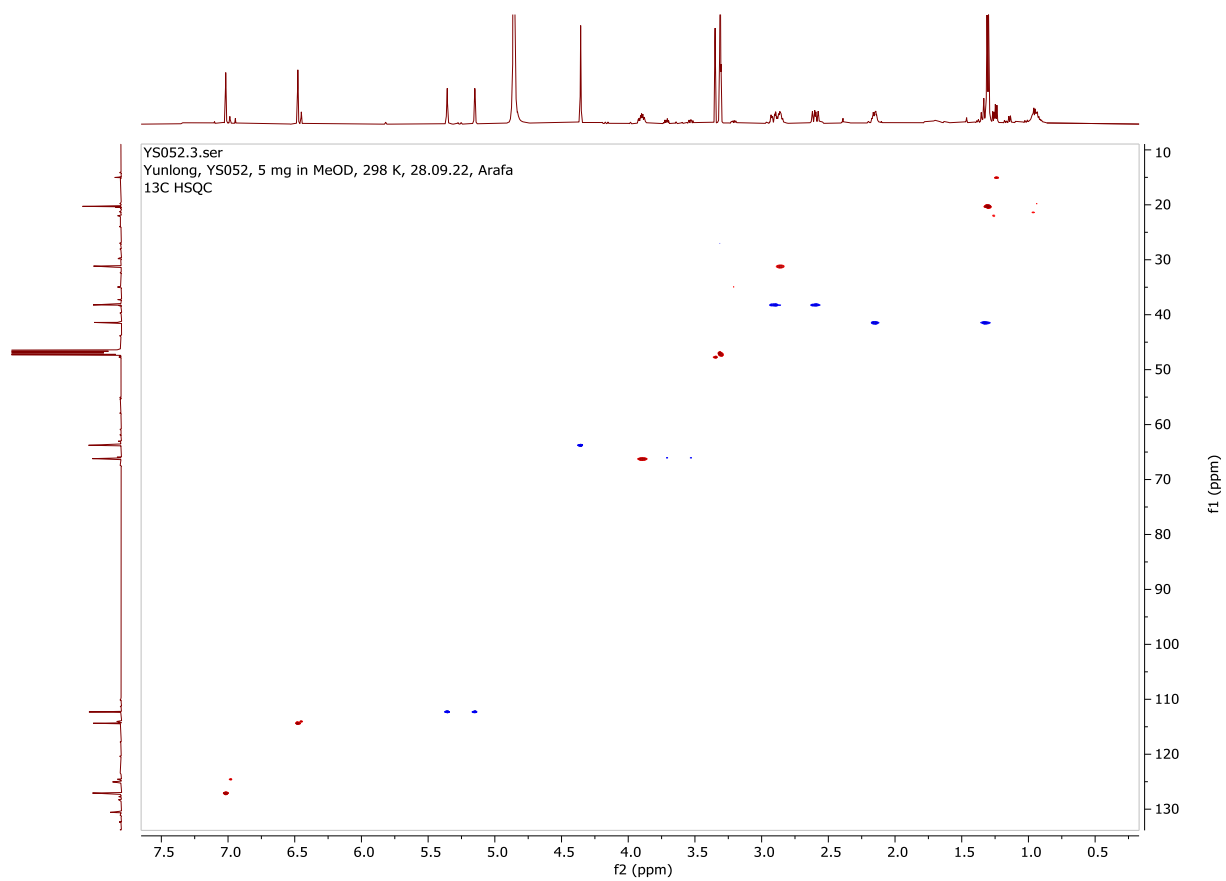

Figure S87 HSQC-spectrum of **15** recorded at 600, 150 MHz in CD<sub>3</sub>OD

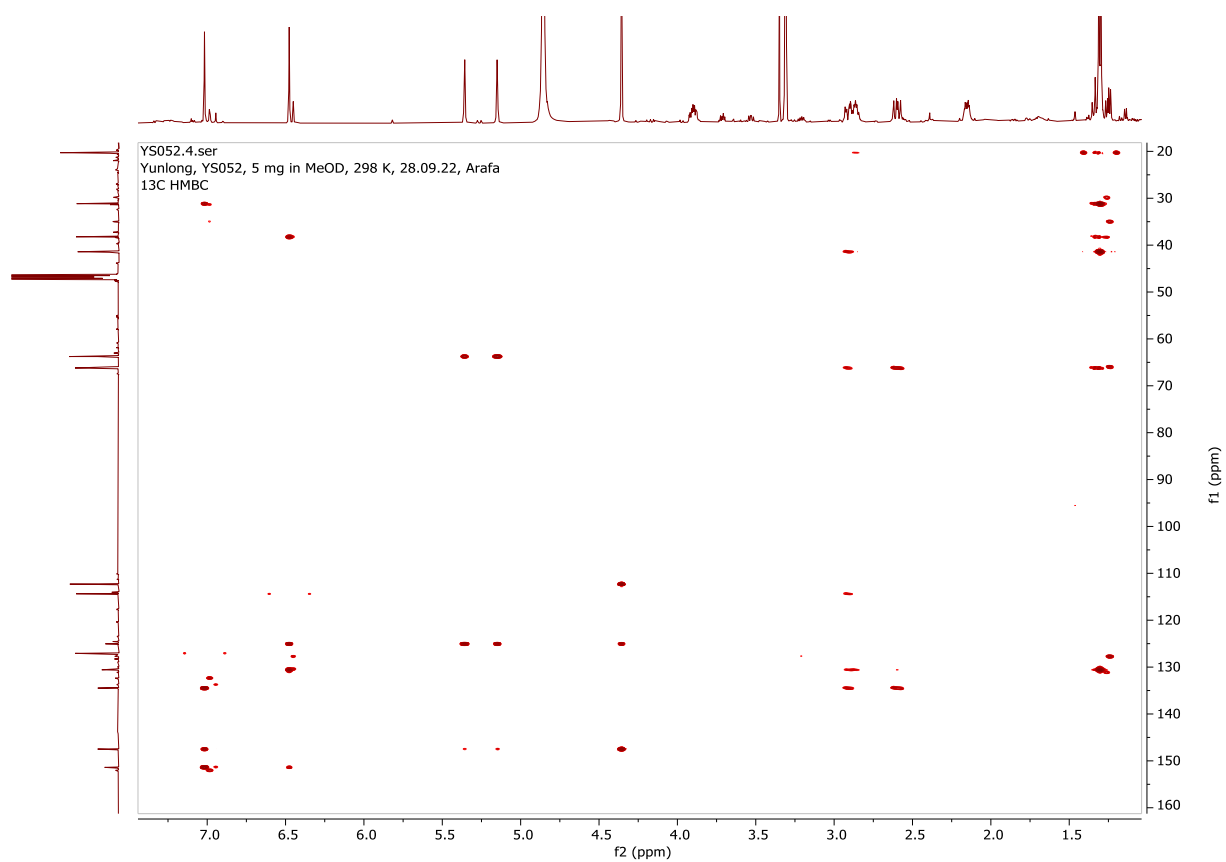

Figure S88 HMBC-spectrum of **15** recorded at 600, 150 MHz in CD<sub>3</sub>OD

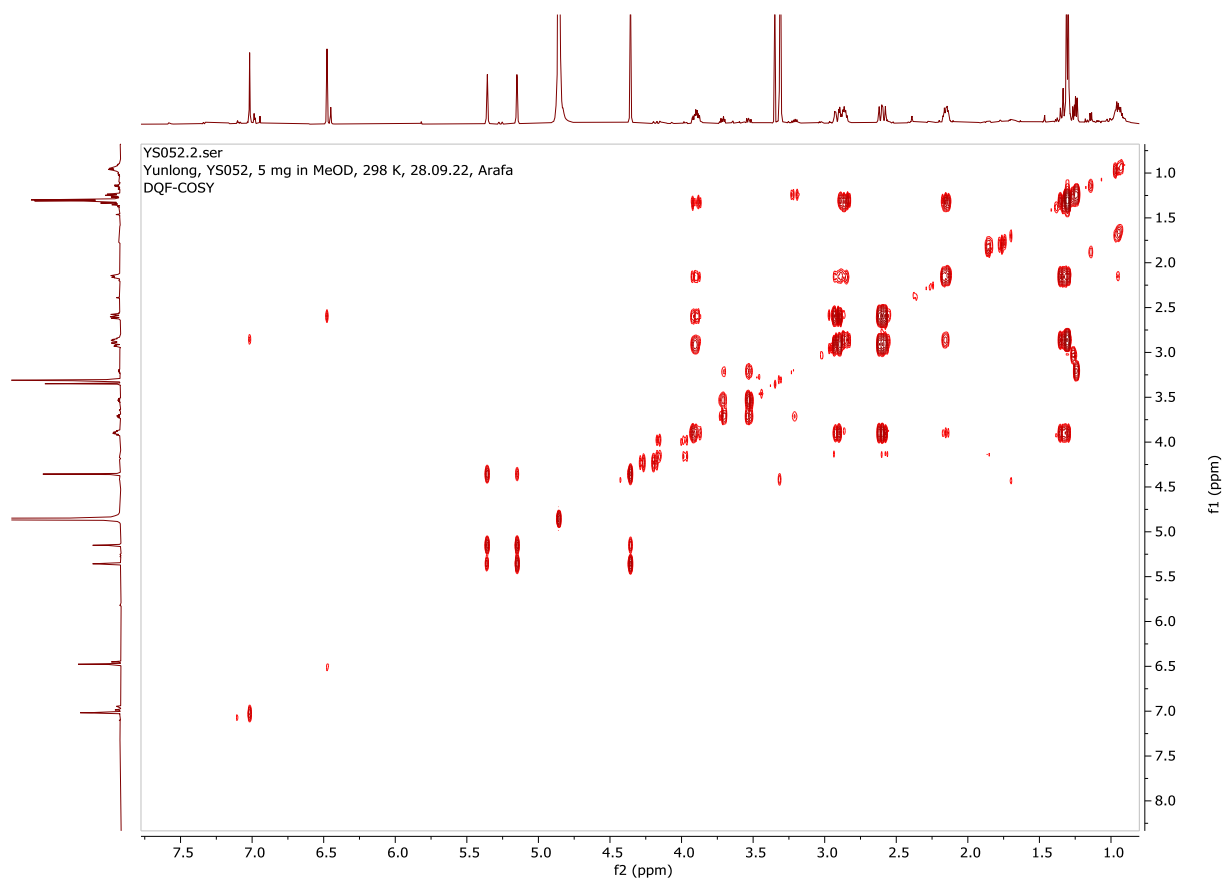

**Figure S89**  $^1\text{H}$ ,  $^1\text{H}$ -COSY-spectrum of **15** recorded at 600 MHz in  $\text{CD}_3\text{OD}$

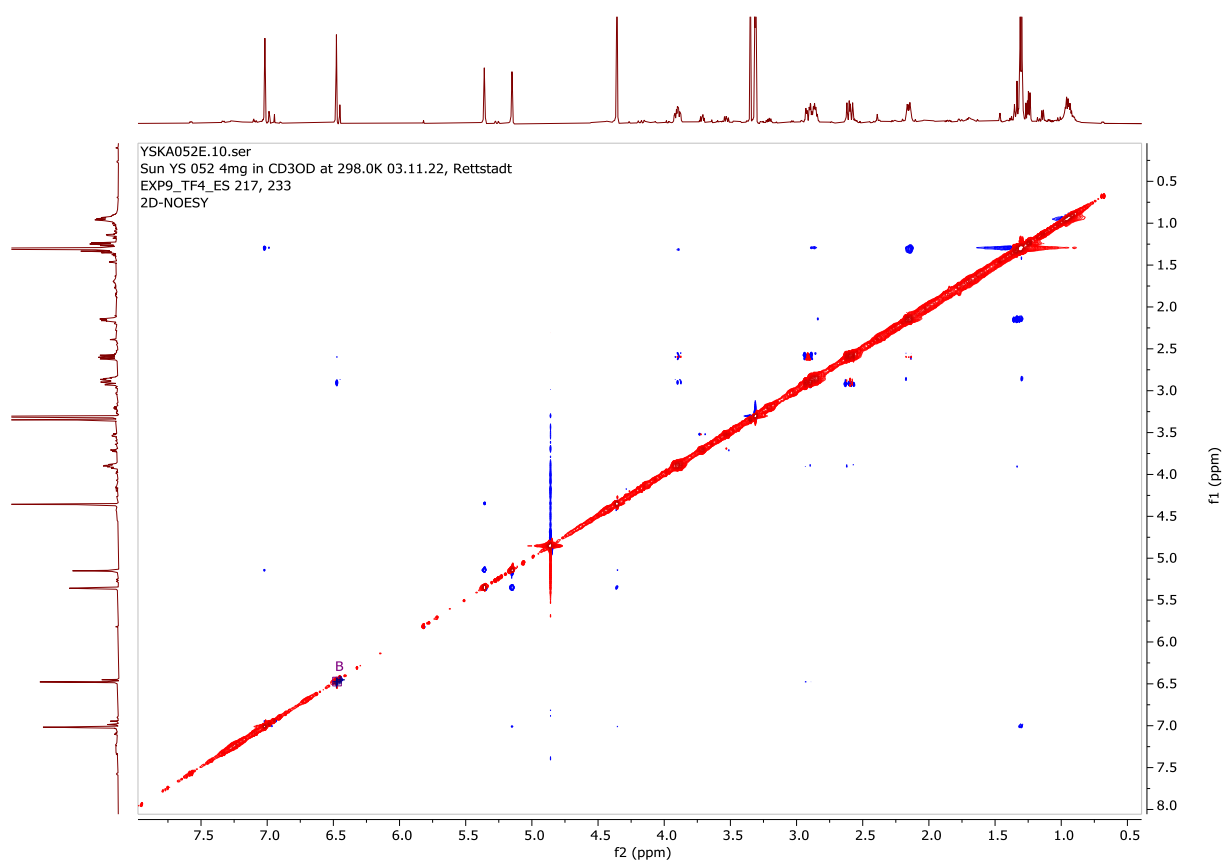

**Figure S90** NOESY-spectrum of **15** recorded at 600 MHz in  $\text{CD}_3\text{OD}$

## Compound 16, 17

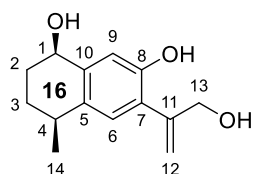

Chemical Formula: C<sub>14</sub>H<sub>18</sub>O<sub>3</sub>  
Exact Mass: 234.1256

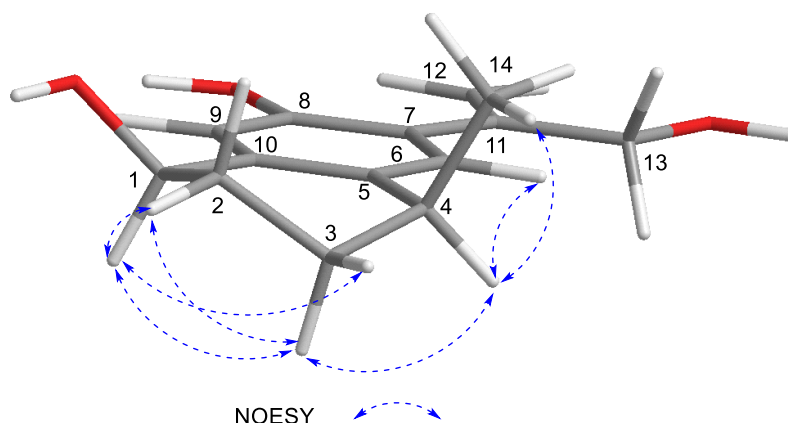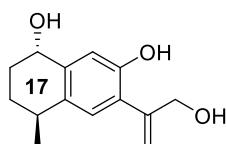

Chemical Formula: C<sub>14</sub>H<sub>18</sub>O<sub>3</sub>  
Exact Mass: 234.1256

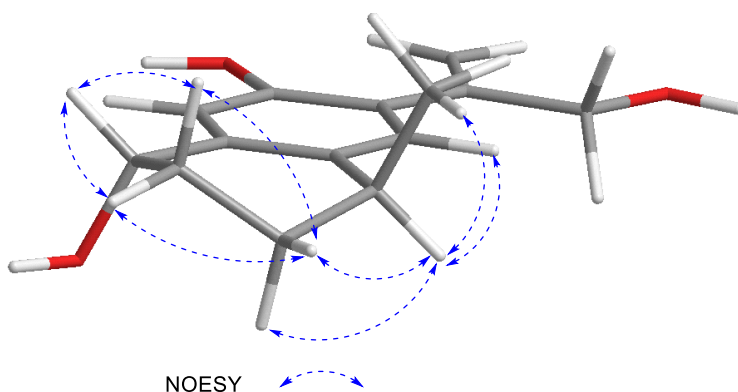

Compounds **16** and **17** were purified and detected to be a single peak by LR-LCMS. Both of their UV ( $\lambda_{\max}$ ) were found to be 289 nm, ESI-MS  $m/z$ :  $[M - H]^- = 233$ ,  $[M - H_2O]^+ = 217$ . HR-ESI-MS  $m/z$   $[M - H]^-$  was found to be 233.1160, and the calculated  $[M - H]^-$  was  $234.1256 - 1.0078 = 233.1178$ .

The NMR showed that compounds **16** and **17** are a mixture. They were proposed to be a pair of epimers according to 1D and 2D NMR. **16** has a hydroxyl group at C-1 which is the (1*R*)-epimer, and **17** also has a hydroxyl group at C-1 which is the (1*S*)-epimer. Compared to <sup>13</sup>C-NMR of compound **15**, C-8, C-11, C-10, C-5, C-6, C-9, C-12, C-13, and C-14 are almost identical with the corresponding carbons of compounds **16**, **17**. C-1, C-3 and C-4 shifted more, which was caused by the hindrance of the hydroxyl group. According to the HMBC, the proton of H-9 has coherence to C-1 at 69.1 ppm and 69.2 ppm which means the hydroxyl group is at C-1 in both epimers. According to the <sup>1</sup>H, <sup>1</sup>H-COSY, the proton of H-9 has a correlation with the proton of H-1 at 4.57 ppm. The proton of H-4 has no correlation with the proton of H-3 at 4.57 ppm. All of the above can prove that the hydroxyl group is at C-1, and there is no hydroxyl group at C-3 in each of the mixtures.

NOESY was used to classify the chemical shift of these two (1*R*) (1*S*) - epimers clearly. First, we built two structure models for those two compounds. We started from the proton of H-4 because two proton signals of H-4 are distinctly located in different chemical shifts (2.84 ppm, 2.75 ppm). By using the protons of H-4 signals in the NOESY, the position of the protons of H-3 was found. The difference in NOESY between the two compounds allows for the identification of their associated signals, which in turn allows for the distinction between the two compounds (Table S20, 21).

| Compound 16 |                  |                         |                                  |              |
|-------------|------------------|-------------------------|----------------------------------|--------------|
| Pos.        | $\delta_C$ / ppm | $\delta_H$ / ppm (J/Hz) | $^1\text{H}$ - $^1\text{H}$ COSY | HMBC (H-C)   |
| 1           | 69.1             | 4.57, 1H, m             | 2, 9                             | 3, 5, 10     |
| 2           | 31.2             | 1.71, 1H, m;            | 2, 3                             | 1, 3, 4, 10  |
|             |                  | 2.07, 1H, m             | 1, 2, 3                          | 1, 3, 4, 10  |
| 3           | 29.1             | 1.42, 1H, m;            | 2, 3, 4                          | 1, 2, 4, 5   |
|             |                  | 2.11, 1H, m             | 3, 4                             | 1, 2, 4, 5   |
| 4           | 33.1             | 2.84, 1H, m             | 3, 14                            | 2, 3, 5, 14  |
| 5           | 134.0            |                         |                                  |              |
| 6           | 130.4            | 6.97, 1H, m             |                                  | 4, 8, 10, 11 |
| 7           | 128.5            |                         |                                  |              |
| 8           | 153.5            |                         |                                  |              |
| 9           | 115.9            | 6.85, 1H, d (0.8)       | 1                                | 1, 5, 7, 8   |
| 10          | 140.6            |                         |                                  |              |
| 11          | 149.6            |                         |                                  |              |
| 12          | 114.5            | 5.16, 1H, m             | 12, 13                           | 7, 11, 13    |
|             |                  | 5.37, 1H, m             | 12, 13                           | 7, 11, 13    |
| 13          | 65.8             | 4.36, 2H, m             | 12                               | 7, 11, 12    |
| 14          | 23.1             | 1.22, 3H, d (7.0)       | 4                                | 3, 4, 5      |

**Table S20** Summarized NMR signals for  $^{13}\text{C}$ ,  $^1\text{H}$ ,  $^1\text{H}$ - $^1\text{H}$  COSY, HMBC for **16** recorded in  $\text{CD}_3\text{OD}$

| Compound 17 |                  |                         |                                  |                |
|-------------|------------------|-------------------------|----------------------------------|----------------|
| Pos.        | $\delta_C$ / ppm | $\delta_H$ / ppm (J/Hz) | $^1\text{H}$ - $^1\text{H}$ COSY | HMBC (H-C)     |
| 1           | 69.2             | 4.57, 1H, m             | 2, 9                             | 3, 5, 10       |
| 2           | 30.8             | 1.88, 2H, m             | 1, 3                             | 1, 3, 4, 10    |
| 3           | 28.7             | 1.68, 1H, m;            | 2, 4                             | 1, 2, 4, 5, 14 |
|             |                  | 1.84, 1H, m             | 2, 4                             | 1, 2, 4, 14    |
| 4           | 33.0             | 2.75, 1H, m             | 3, 14                            | 2, 3, 5, 14    |
| 5           | 134.2            |                         |                                  |                |
| 6           | 130.3            | 6.98, 1H, m             |                                  | 4, 8, 10, 11,  |
| 7           | 128.5            |                         |                                  |                |
| 8           | 153.5            |                         |                                  |                |
| 9           | 115.8            | 6.86, 1H, d (0.9)       | 1                                | 1, 5, 7, 8     |
| 10          | 140.5            |                         |                                  |                |
| 11          | 149.6            |                         |                                  |                |
| 12          | 114.5            | 5.16, 1H, m;            | 12, 13                           | 7, 11, 13      |
|             |                  | 5.37, 1H, m             | 12, 13                           | 7, 11, 13      |
| 13          | 65.8             | 4.36, 2H, m             |                                  | 7, 11, 12      |
| 14          | 23.0             | 1.28, 3H, d (7.0)       | 4                                | 3, 4, 5        |

**Table S21** Summarized NMR signals for  $^{13}\text{C}$ ,  $^1\text{H}$ ,  $^1\text{H}$ - $^1\text{H}$  COSY, HMBC for **17** recorded in  $\text{CD}_3\text{OD}$

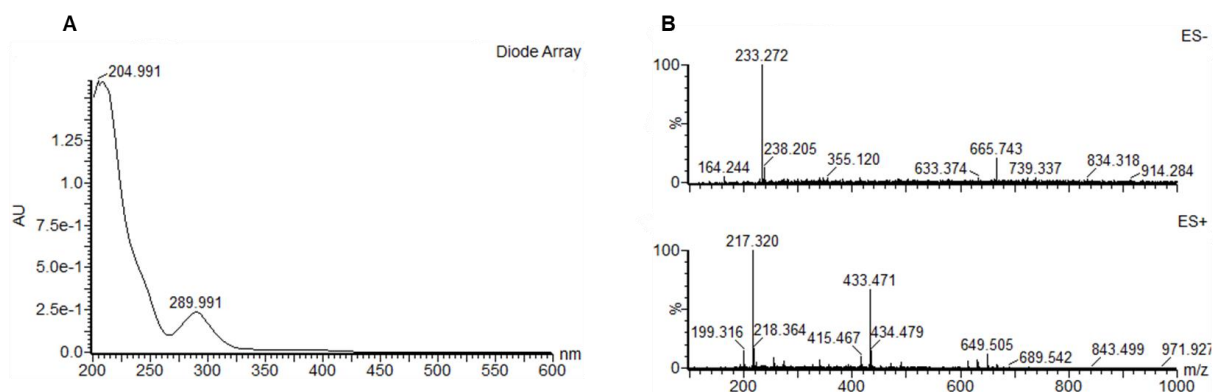

Figure S91 UV-absorption (A) and fragmentation pattern (B) of 16 and 17 in ES<sup>+</sup> TIC (bottom) and ES<sup>-</sup> TIC (top) by LR-LCMS

## Elemental Composition Report

Page 1

### Single Mass Analysis

Tolerance = 20.0 PPM / DBE: min = -1.5, max = 50.0

Element prediction: Off

Number of isotope peaks used for i-FIT = 3

Monoisotopic Mass, Odd and Even Electron Ions

744 formula(e) evaluated with 13 results within limits (all results (up to 1000) for each mass)

Elements Used:

C: 0-95 H: 0-132 N: 0-9 O: 0-24 S: 0-4

Sun

QToF Premier HAB321

YS 050 530 (5.411) AM (Cen,4, 70.00, Ht,10000.0,554.26,0.70,LS 10)

1: TOF MS ES-  
2.19e+002

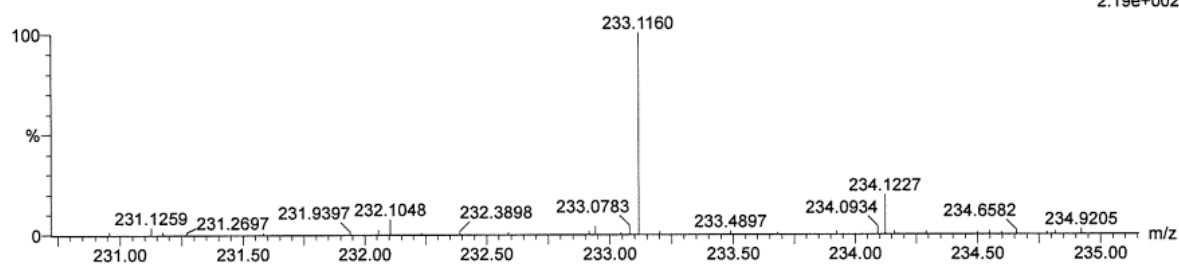

Minimum: -1.5  
Maximum: 5.0 20.0 50.0

| Mass     | Calc. Mass | mDa  | PPM  | DBE  | i-FIT | i-FIT (Norm) | Formula        |
|----------|------------|------|------|------|-------|--------------|----------------|
| 233.1160 | 233.1164   | -0.4 | -1.7 | 7.0  | 48.4  | 1.1          | C12 H15 N3 O2  |
|          | 233.1151   | 0.9  | 3.9  | 7.5  | 48.6  | 1.4          | C10 H13 N6 O   |
|          | 233.1171   | -1.1 | -4.7 | 3.0  | 54.3  | 7.1          | C5 H15 N9 S    |
|          | 233.1146   | 1.4  | 6.0  | 1.5  | 55.5  | 8.3          | C10 H21 N2 S2  |
|          | 233.1144   | 1.6  | 6.9  | -1.5 | 55.5  | 8.3          | C2 H17 N8 O3 S |
|          | 233.1178   | -1.8 | -7.7 | 6.5  | 48.9  | 1.7          | C14 H17 O3     |

Figure S92 HRMS data for 16 and 17;  $m/z$  (M-H)<sup>-</sup> calc. mass is 233.1178, 233.1160 was found

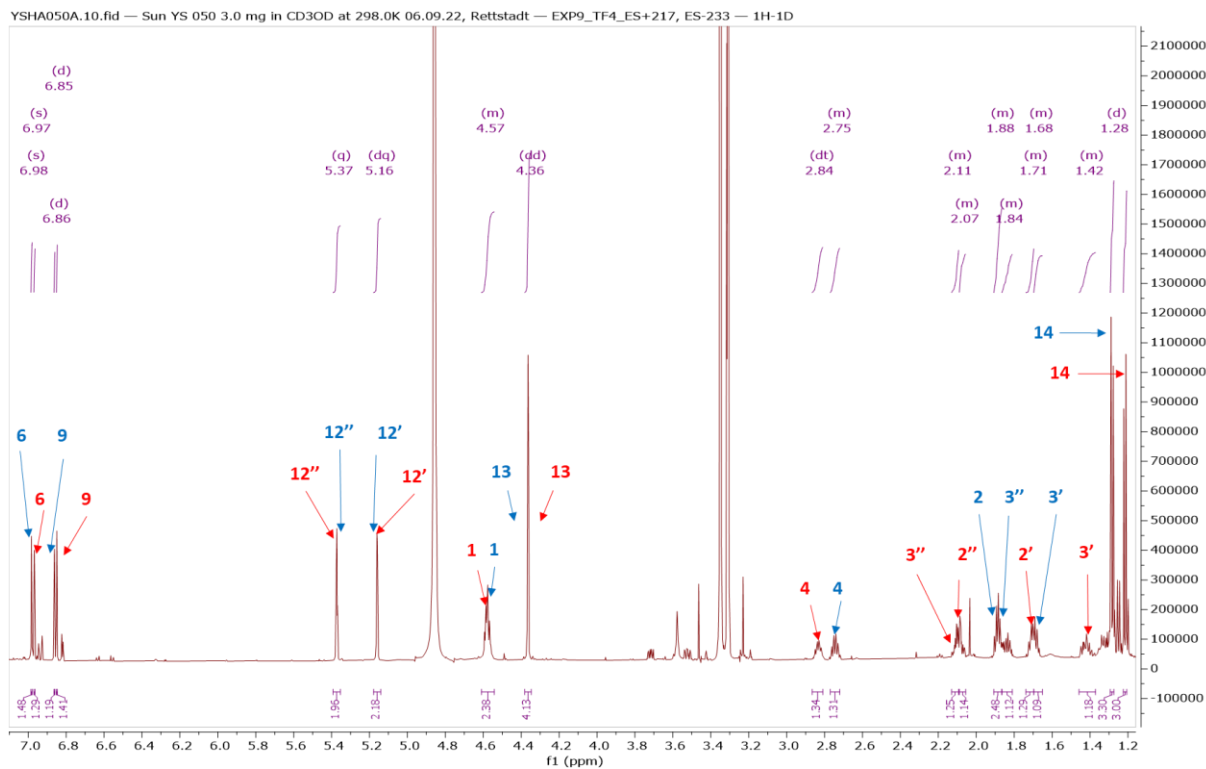

**Figure S93**  $^1\text{H-NMR}$  of **16** and **17** mixture recorded at 600 MHz in  $\text{CD}_3\text{OD}$ . The red numbers and arrows represent the proton positions of **16**; The blue numbers and arrows represent the proton positions of **17**. The shifts labels are on the top of the integral curves; the type of the peaks are in the brackets.

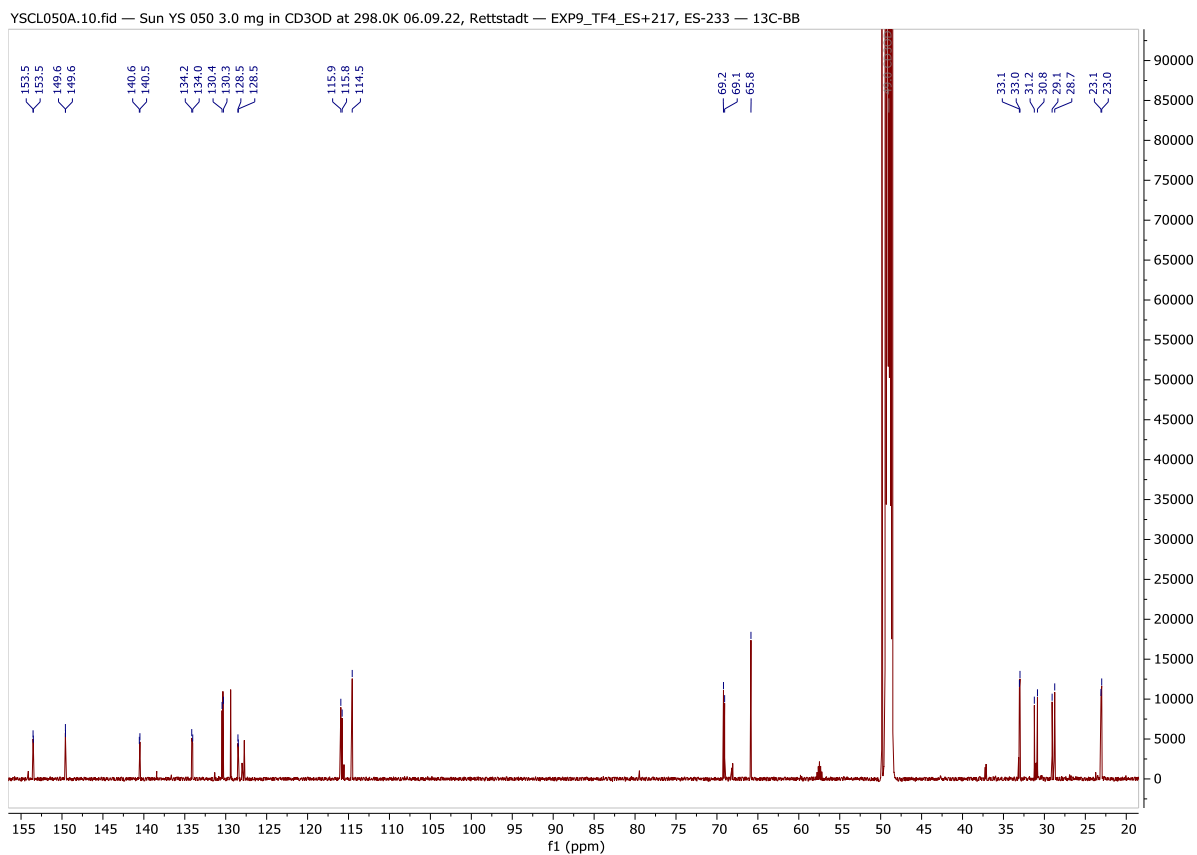

**Figure S94**  $^{13}\text{C-NMR}$  of **16** and **17** mixture recorded at 150 MHz in  $\text{CD}_3\text{OD}$ .

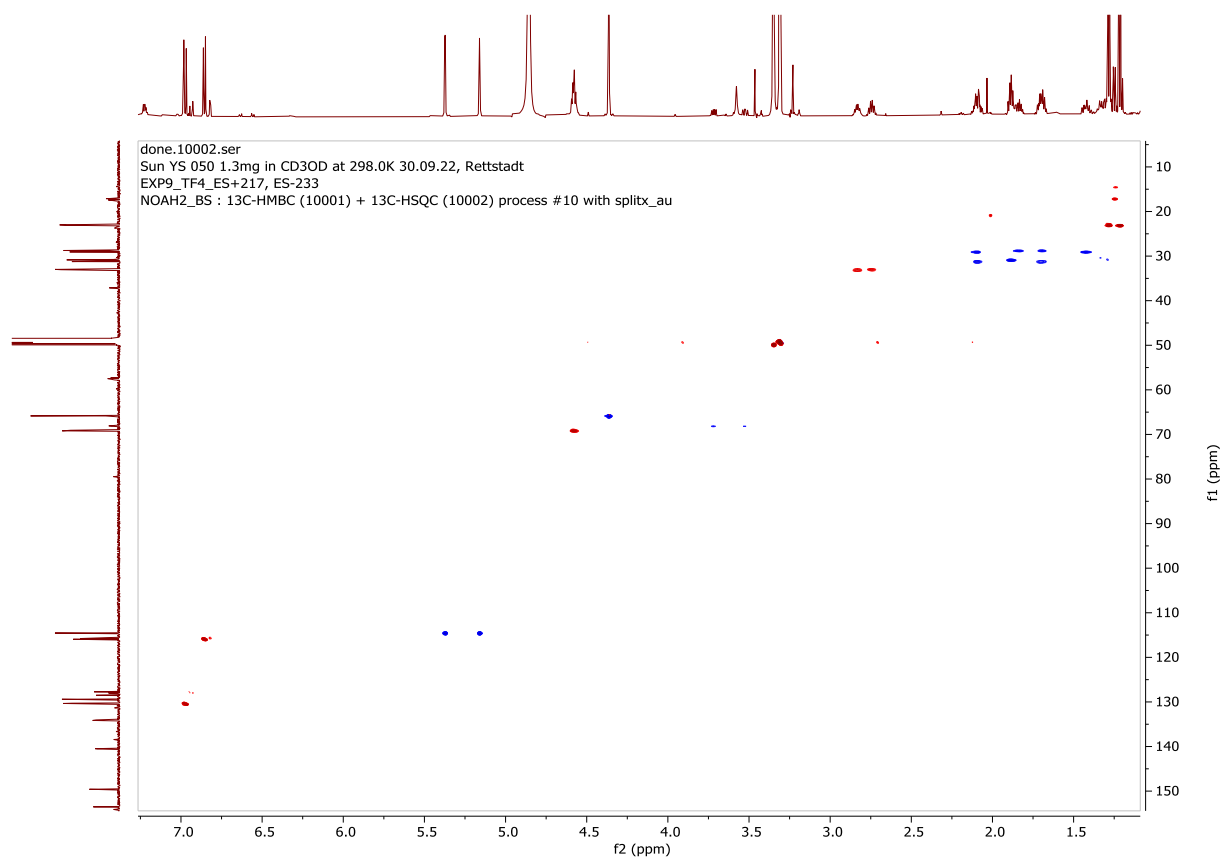

Figure S95 HSQC-spectrum of **16** and **17** mixture recorded at 600, 150 MHz in CD<sub>3</sub>OD

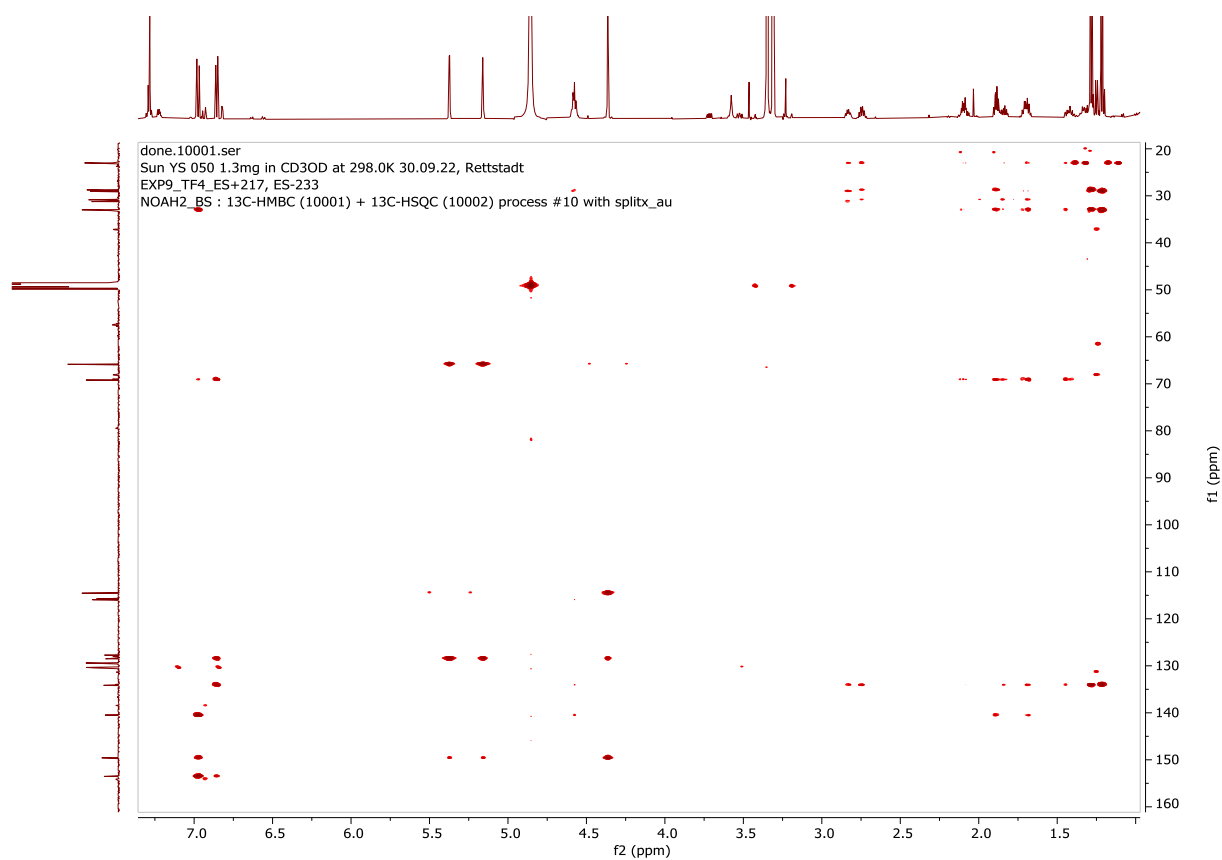

Figure S96 HMBC-spectrum of **16** and **17** mixture recorded at 600, 150 MHz in CD<sub>3</sub>OD



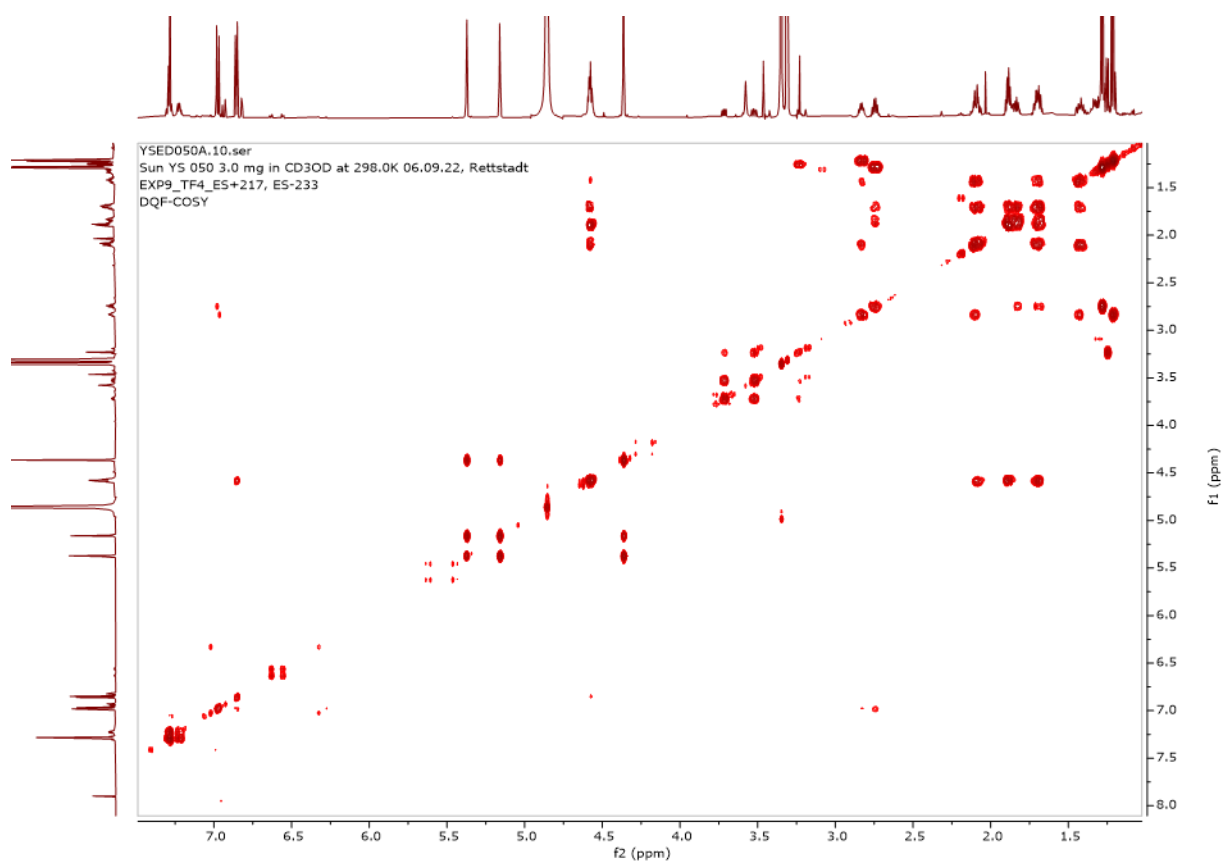

Figure S97 <sup>1</sup>H, <sup>1</sup>H-COSY-spectrum of **16** and **17** mixture recorded at 600 MHz in CD<sub>3</sub>OD

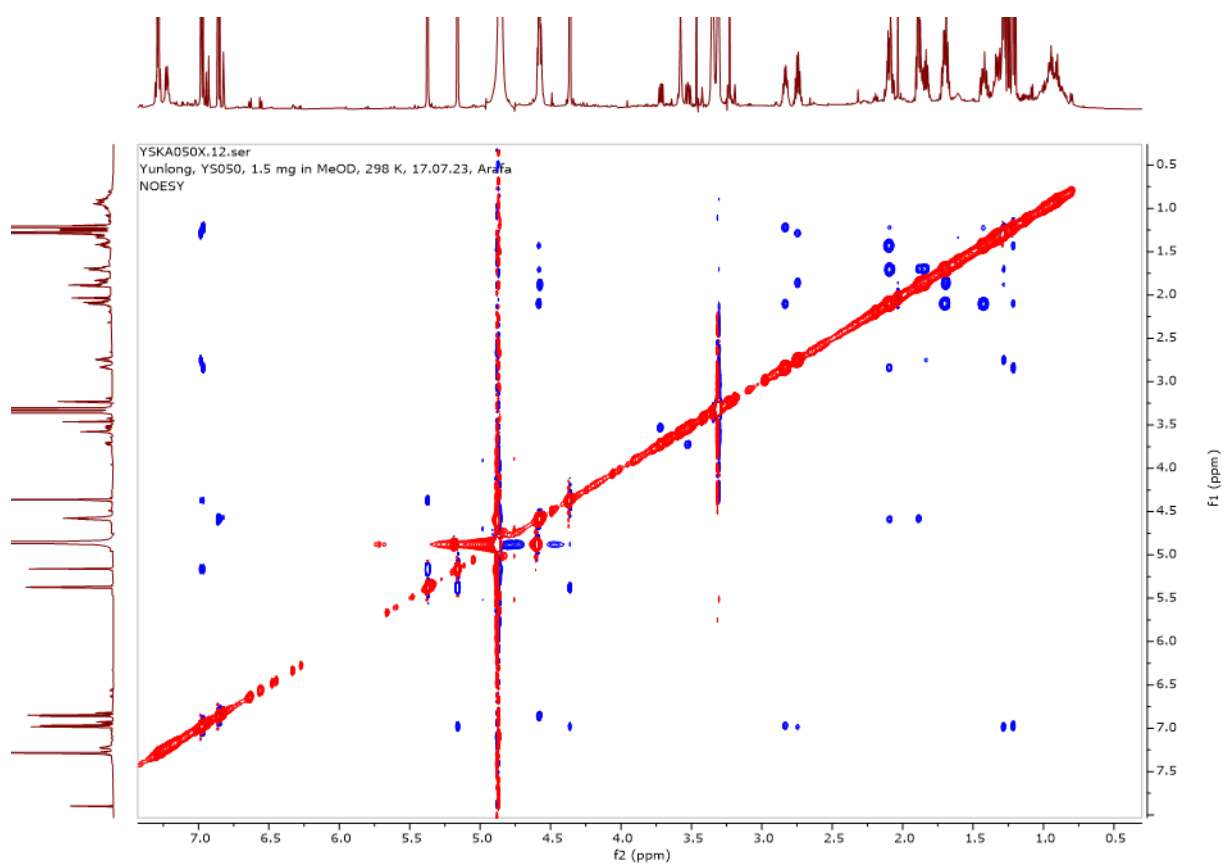

Figure S98 NOESY-spectrum of **16** and **17** mixture recorded at 600 MHz in CD<sub>3</sub>OD

## Compound 18

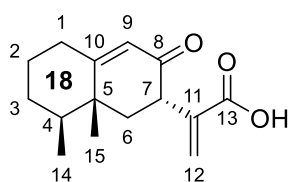

Chemical Formula: C<sub>15</sub>H<sub>20</sub>O<sub>3</sub>  
Exact Mass: 248.1412

| Compound 18 |                  |                          |                                     |                  |
|-------------|------------------|--------------------------|-------------------------------------|------------------|
| Pos.        | $\delta_c$ / ppm | $\delta_H$ / ppm (J/Hz)  | <sup>1</sup> H- <sup>1</sup> H COSY | HMBC (H-C)       |
| 1           | 33.2             | 2.32, 2H, m              | 1, 2, 9                             | 2                |
| 2           | 26.4             | 1.46, 1H, m;             | 2, 1, 3                             | 4                |
|             |                  | 1.87, 1H, m              | 2, 1, 3                             | 4, 10            |
| 3           | 30.5             | 1.46, 1H, m;             | 3, 2, 4                             | 2, 4, 5          |
|             |                  | 1.56, 1H, m              | 3, 2                                | 1, 2, 4, 5       |
| 4           | 43.7             | 1.48, 1H, m              | 14                                  | 3, 5             |
| 5           | 39.9             |                          |                                     |                  |
| 6           | 41.8             | 2.02, 2H, m              | 6, 7                                | 5, 7, 8, 11, 13  |
| 7           | 45.9             | 3.56, 1H, dd (12.0, 6.9) | 6                                   | 6, 8, 11, 12, 13 |
| 8           | 198.0            |                          |                                     |                  |
| 9           | 123.7            | 5.78, 1H, d (1.7)        | 1                                   | 1, 5, 7          |
| 10          | 170.9            |                          |                                     |                  |
| 11          | 139.0            |                          |                                     |                  |
| 12          | 128.5            | 5.71, 1H, s;             |                                     | 7, 11, 13        |
|             |                  | 6.45, 1H, s              |                                     | 7, 11, 13        |
| 13          | 170.0            |                          |                                     |                  |
| 14          | 15.3             | 0.92, 3H, d (5.7)        | 4                                   | 3, 4, 5          |
| 15          | 16.2             | 1.19, 3H, s              |                                     | 4, 5, 6, 10      |

**Table S22** Summarized NMR signals for <sup>13</sup>C, <sup>1</sup>H, <sup>1</sup>H-<sup>1</sup>H COSY, HMBC for **18** recorded in CDCl<sub>3</sub>

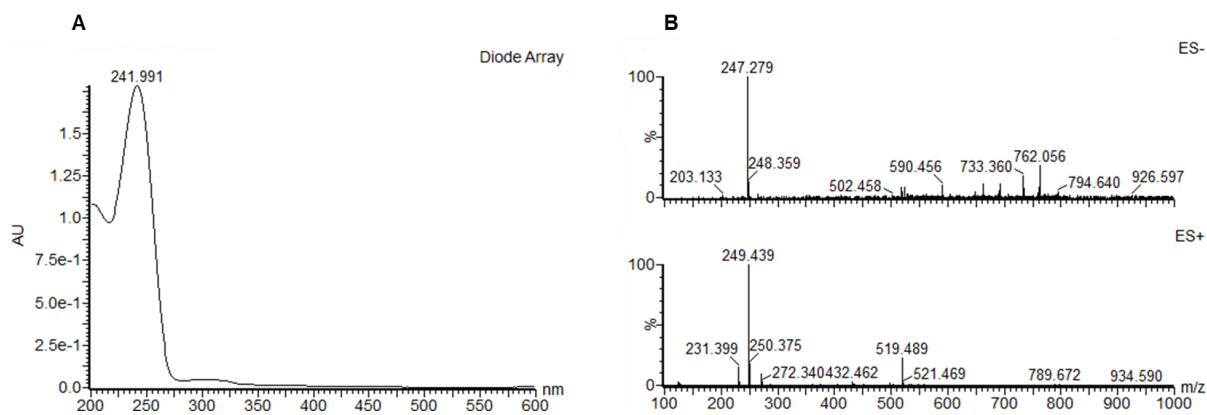

Figure S99 UV-absorption (A) and fragmentation pattern (B) of **18** in ES<sup>+</sup> TIC (bottom) and ES<sup>-</sup> TIC (top) by LR-LCMS

## Elemental Composition Report

Page 1

### Single Mass Analysis (displaying only valid results)

Tolerance = 10.0 PPM / DBE: min = -1.5, max = 50.0

Selected filters: None

Monoisotopic Mass, Odd and Even Electron Ions

114 formula(e) evaluated with 3 results within limits (up to 40 closest results for each mass)

Elements Used:

C: 0-40 H: 0-85 N: 0-6 O: 0-4

Sun

LCT Premier KD070

YS 040, neg 10 (0.234) AM (Cen,4, 70.00, Ar,10000.0,554.26,0.70,LS 5); Cm (8:11)

1: TOF MS ES-  
1.50e3

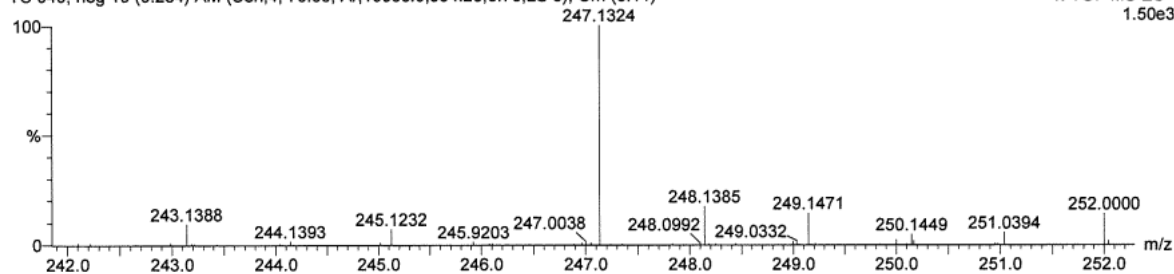

Minimum: -1.5  
Maximum: 5.0 10.0 50.0

| Mass     | Calc. Mass | mDa  | PPM  | DBE | i-FIT | Formula       |
|----------|------------|------|------|-----|-------|---------------|
| 247.1324 | 247.1321   | 0.3  | 1.2  | 7.0 | 84.7  | C13 H17 N3 O2 |
|          | 247.1334   | -1.0 | -4.0 | 6.5 | 78.8  | C15 H19 O3    |
|          | 247.1307   | 1.7  | 6.9  | 7.5 | 92.3  | C11 H15 N6 O  |

Figure S100 HRMS data for **18**;  $m/z$  (M-H)<sup>-</sup> calc. mass is 247.1334, 247.1324 was found

YSHA040G.10.1.1r — Sun YS 040 2.2mg in CDCl3 at 298.0K 12.09.22, Rettstadt — EXP5\_249,247 — 1H-1D

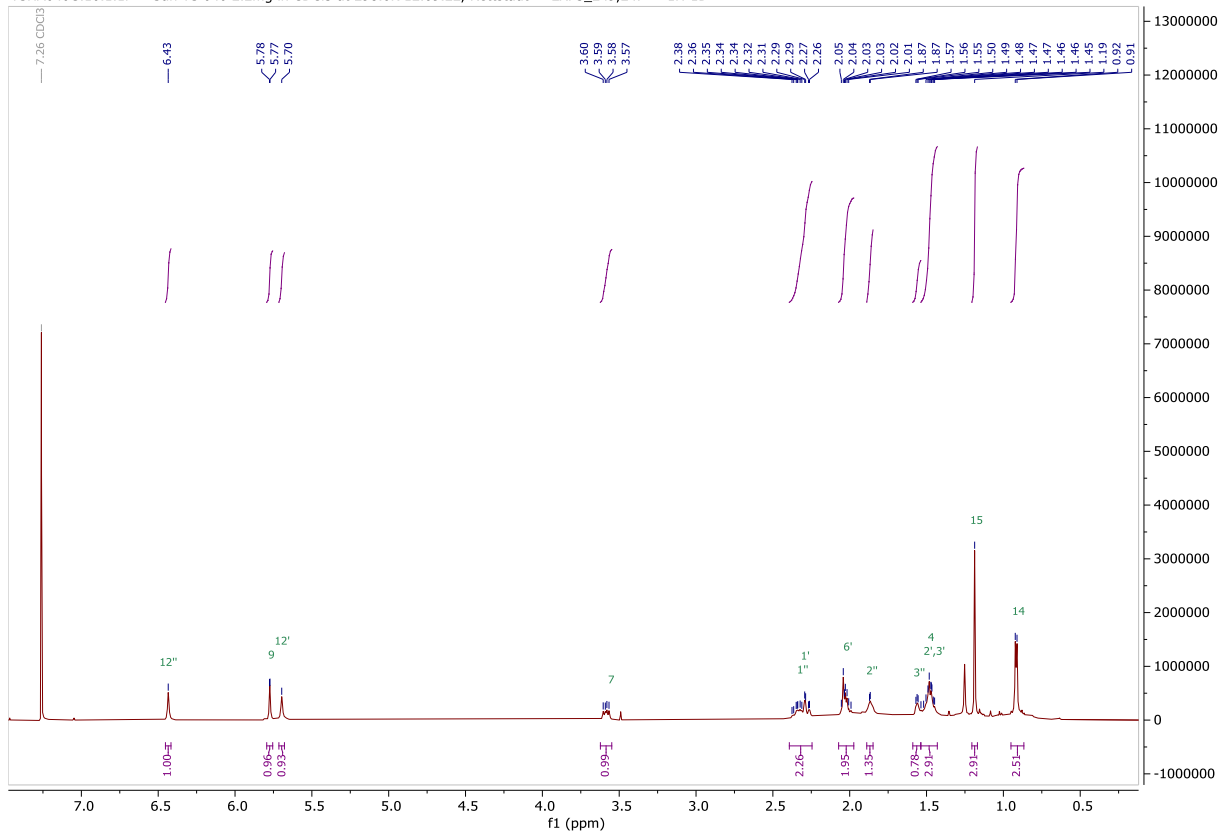

Figure S101 <sup>1</sup>H-NMR of **18** recorded at 500 MHz in CDCl<sub>3</sub>

YSCL040A.10.1.1r — Sun YS 040 2.8mg in CDCl3 at 298.0K 12.08.22, Rettstadt — EXP5\_249,247 — 13C-BB

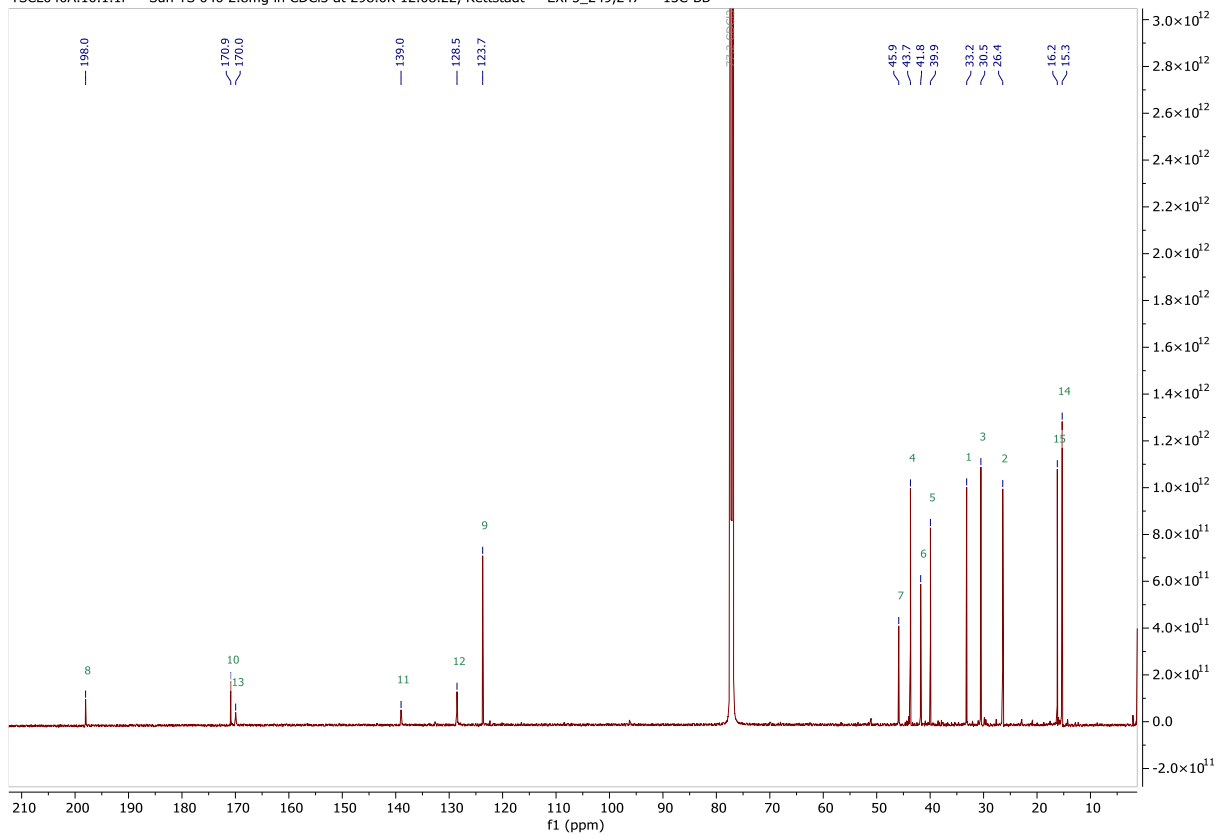

Figure S102 <sup>13</sup>C-NMR of **18** recorded at 150 MHz in CDCl<sub>3</sub>

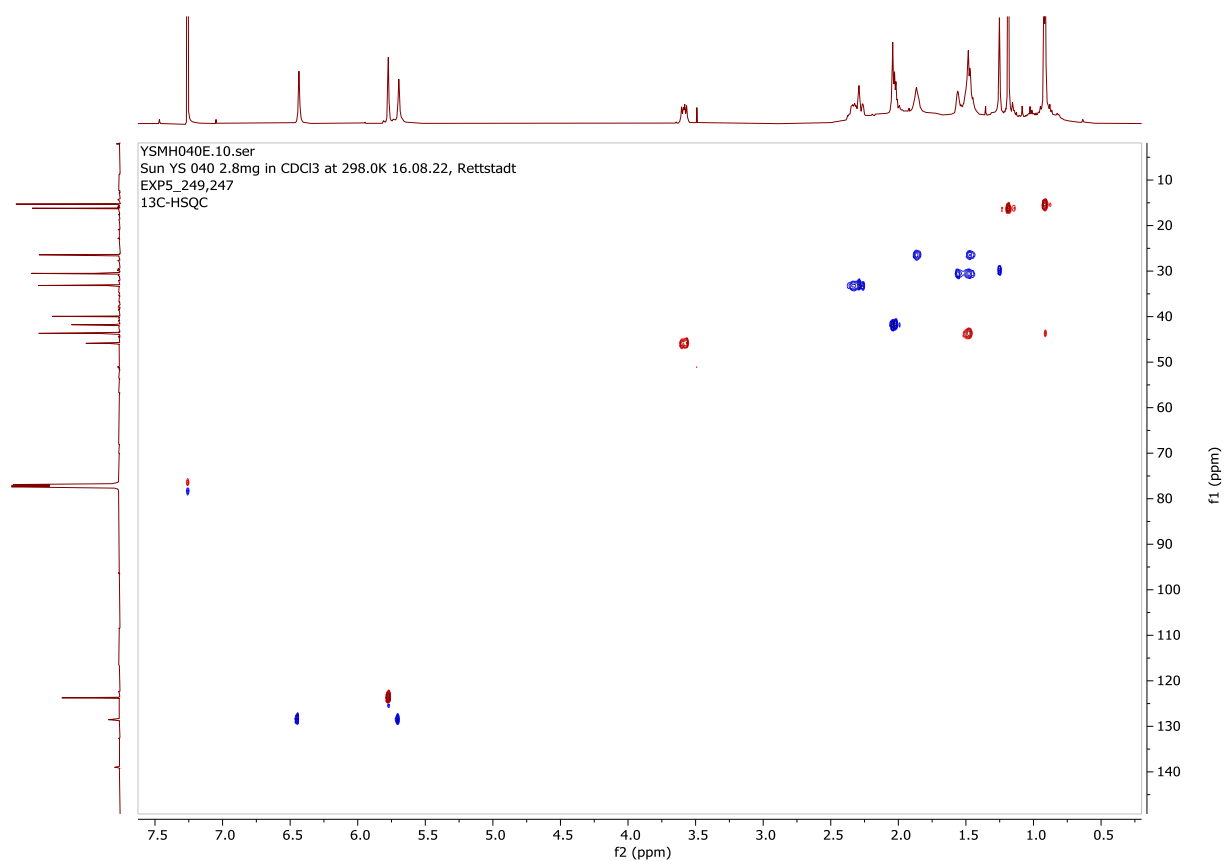

Figure S103 HSQC-spectrum of **18** recorded at 500, 125 MHz in  $\text{CDCl}_3$

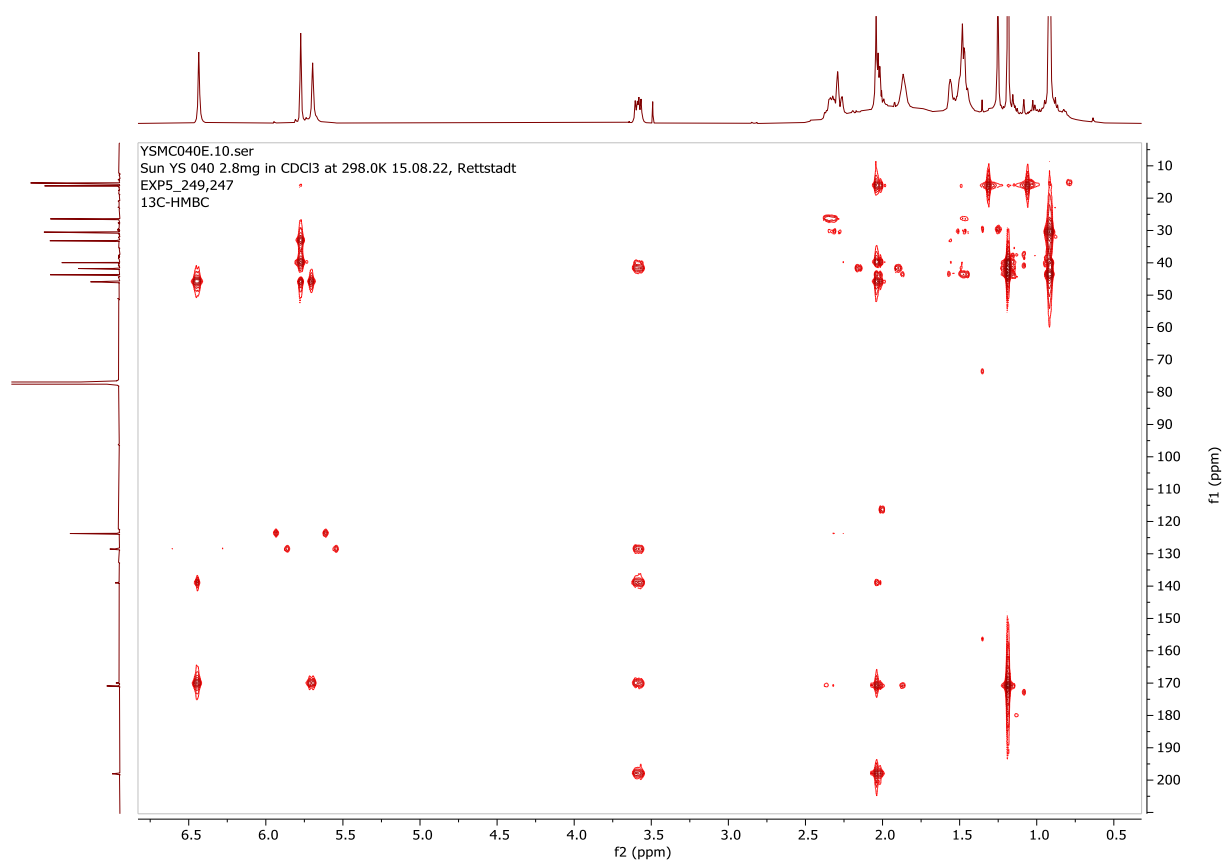

Figure S104 HMBC-spectrum of **18** recorded at 500, 125 MHz in  $\text{CDCl}_3$

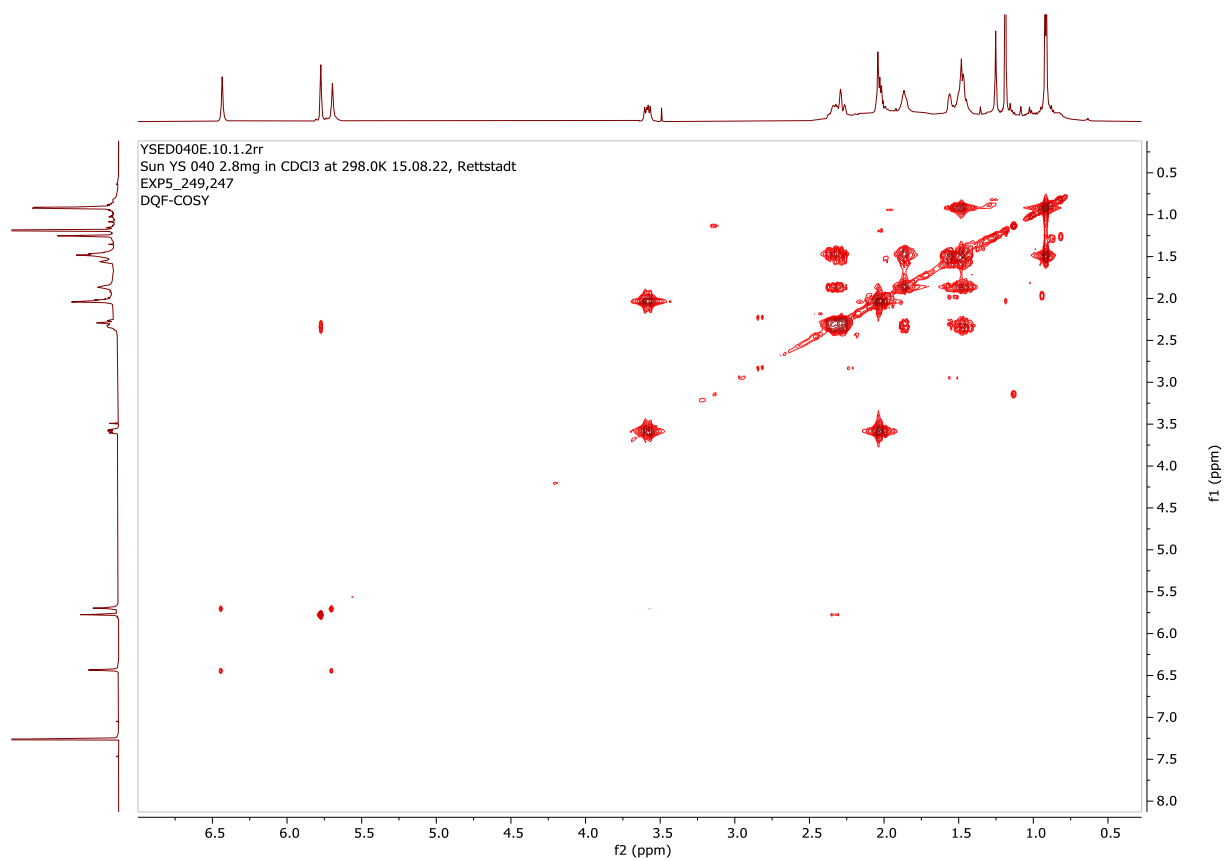

Figure S105 <sup>1</sup>H, <sup>1</sup>H-COSY-spectrum of **18** recorded at 500 MHz in CDCl<sub>3</sub>

## Compound 19

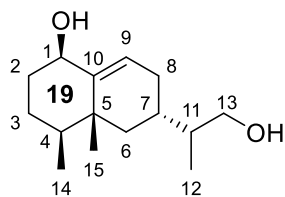

Chemical Formula: C<sub>15</sub>H<sub>26</sub>O<sub>2</sub>  
Exact Mass: 238.1933

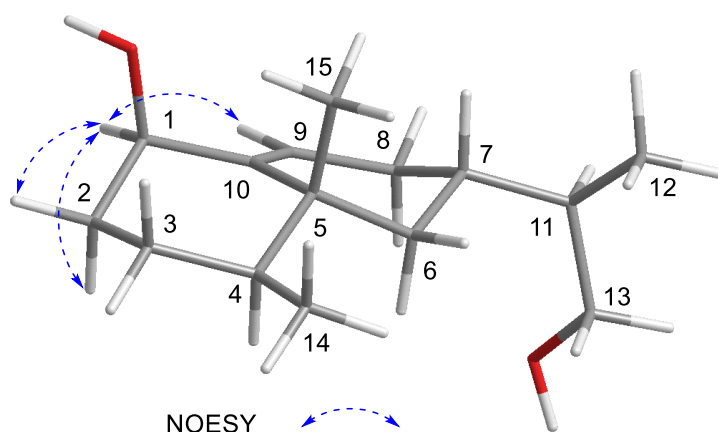

| Compound 19 |                  |                                      |                                     |                     |
|-------------|------------------|--------------------------------------|-------------------------------------|---------------------|
| Pos.        | $\delta_c$ / ppm | $\delta_H$ / ppm (J/Hz)              | <sup>1</sup> H- <sup>1</sup> H COSY | HMBC (H-C)          |
| 1           | 74.9             | 4.21, 1H, dd (3.0, 3.0)              | 2                                   | 3, 9                |
| 2           | 33.7             | 1.56, 1H, m;                         | 2, 3, 4                             | 3, 4                |
|             |                  | 1.89, 1H, dddd (13.8, 2.8, 2.8, 2.7) | 2, 3, 1                             | 1, 2, 3             |
| 3           | 25.6             | 1.31, 1H, m;                         | 2, 3                                | 1, 2, 4, 5          |
|             |                  | 1.79, 1H, m                          | 2, 3, 4                             | 2, 4                |
| 4           | 43.9             | 1.31, 1H, m                          | 3, 14                               | 5, 15               |
| 5           | 38.0             |                                      |                                     |                     |
| 6           | 43.1             | 1.01, 1H, dd (12.2, 12.2);           | 6, 7                                | 4, 5, 7, 8, 11, 15  |
|             |                  | 1.66, 1H, m                          | 6                                   | 5, 7, 8, 10, 11, 15 |
| 7           | 31.3             | 1.8, 1H, m                           | 6, 8, 11                            | 6, 8, 11            |
| 8           | 28.4             | 1.76, 1H, m;                         | 8, 7, 9                             | 6, 7, 9, 10         |
|             |                  | 2.02, 1H, m                          | 8, 7, 9                             | 6, 7, 9, 10         |
| 9           | 125.9            | 5.6, 1H, dd (5.3, 2.1)               | 8                                   | 1, 5, 7, 8          |
| 10          | 145.3            |                                      |                                     |                     |
| 11          | 40.5             | 1.59, 1H, m                          | 7, 12, 13                           | 6, 7, 8, 12, 13     |
| 12          | 13.1             | 0.93, 3H, d (6.9)                    | 11                                  | 7, 11, 13           |
| 13          | 66.6             | 3.51, 1H, dd (10.5, 6.7);            | 13, 11                              | 7, 11, 12           |
|             |                  | 3.64, 1H, dd (10.5, 5.7)             | 13, 11                              | 7, 11, 12           |
| 14          | 15.8             | 0.9, 3H, d (6.7)                     | 4                                   | 3, 4, 5             |
| 15          | 21.0             | 1.13, 3H, s                          |                                     | 4, 5, 6, 10         |

Table S23 Summarized NMR signals for <sup>13</sup>C, <sup>1</sup>H, <sup>1</sup>H-<sup>1</sup>H COSY, HMBC for **19** recorded in CDCl<sub>3</sub>

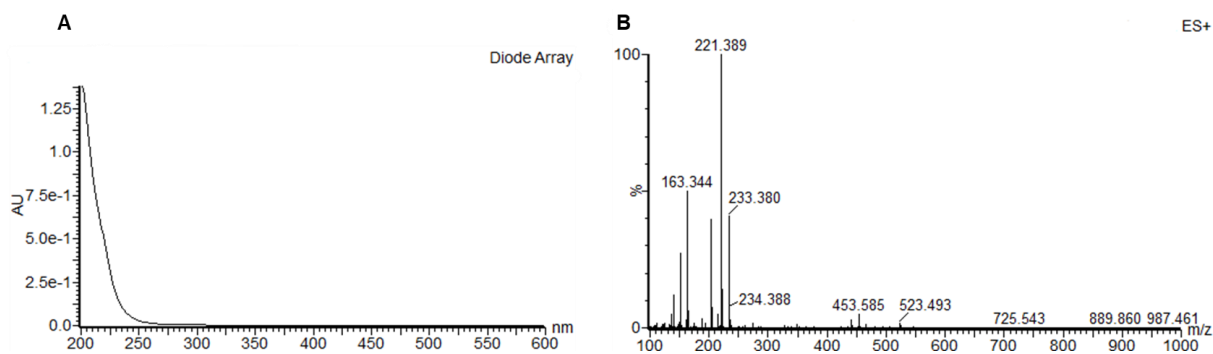

Figure S106 UV-absorption (A) and fragmentation pattern (B) of 19 in ES<sup>+</sup> TIC by LR-LCMS

### Elemental Composition Report

Page 1

#### Single Mass Analysis

Tolerance = 20.0 PPM / DBE: min = -1.5, max = 50.0

Element prediction: Off

Number of isotope peaks used for i-FIT = 3

Monoisotopic Mass, Even Electron Ions

28 formula(e) evaluated with 2 results within limits (all results (up to 1000) for each mass)

Elements Used:

C: 0-31 H: 0-45 O: 0-3 Na: 0-1

Sun

QToF Premier HAB321

YS 062 745 (7.625) AM (Cen,4, 80.00, Ht,10000.0,556.28,0.70,LS 10)

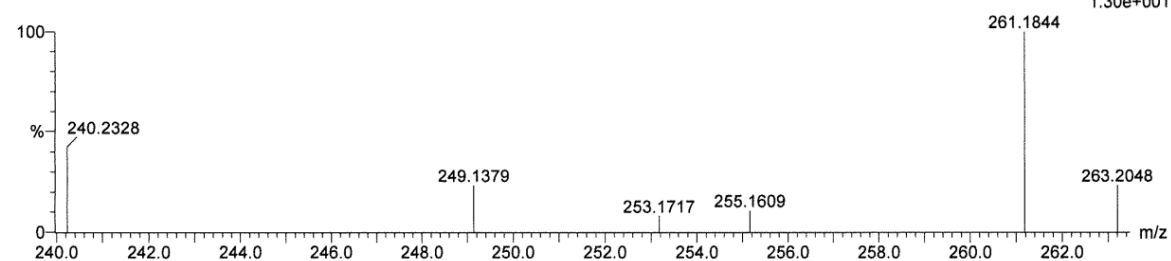

Minimum: -1.5  
Maximum: 5.0 20.0 50.0

| Mass     | Calc. Mass | mDa  | PPM  | DBE | i-FIT | i-FIT (Norm) | Formula       |
|----------|------------|------|------|-----|-------|--------------|---------------|
| 261.1844 | 261.1855   | -1.1 | -4.2 | 5.5 | 10.1  | 0.6          | C17 H25 O2    |
|          | 261.1831   | 1.3  | 5.0  | 2.5 | 10.2  | 0.8          | C15 H26 O2 Na |

Figure S107 HRMS data for 19;  $m/z$  (M + Na)<sup>+</sup> calc. mass is 261.1855, 261.1844 was found



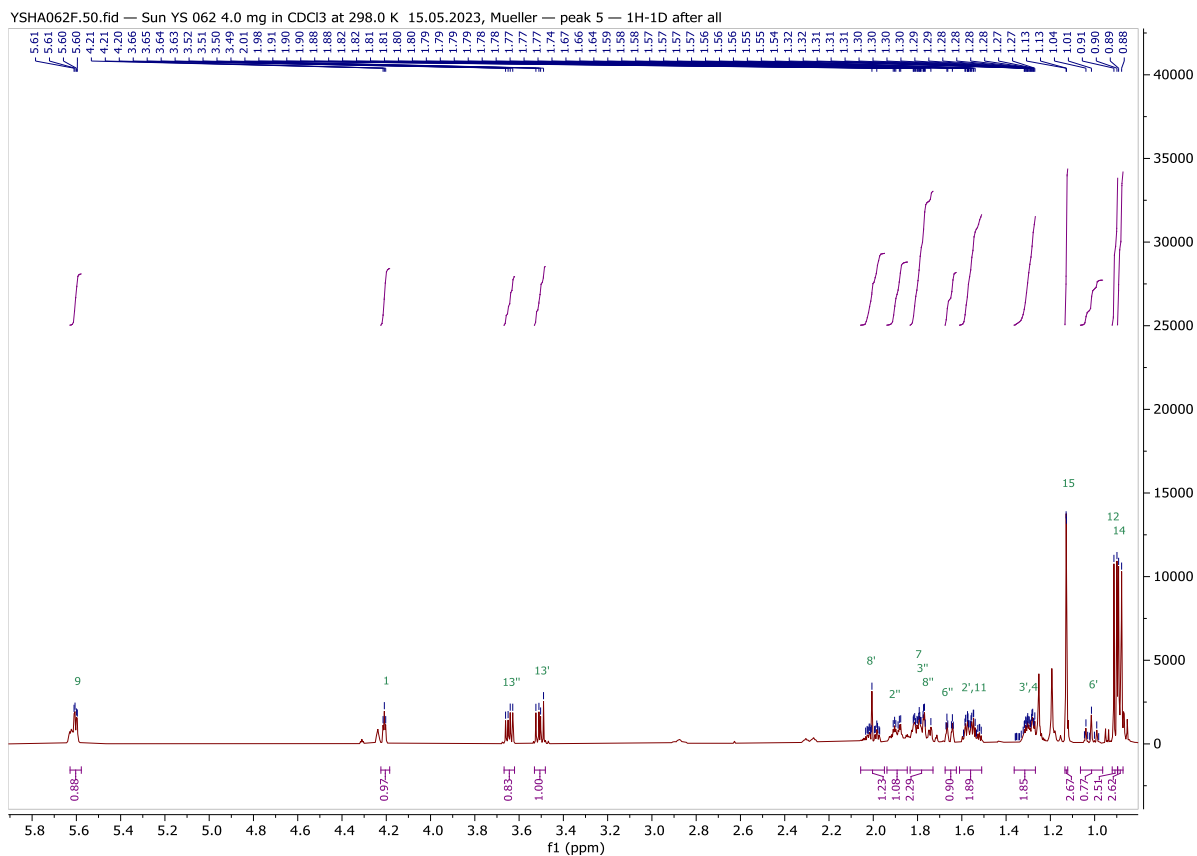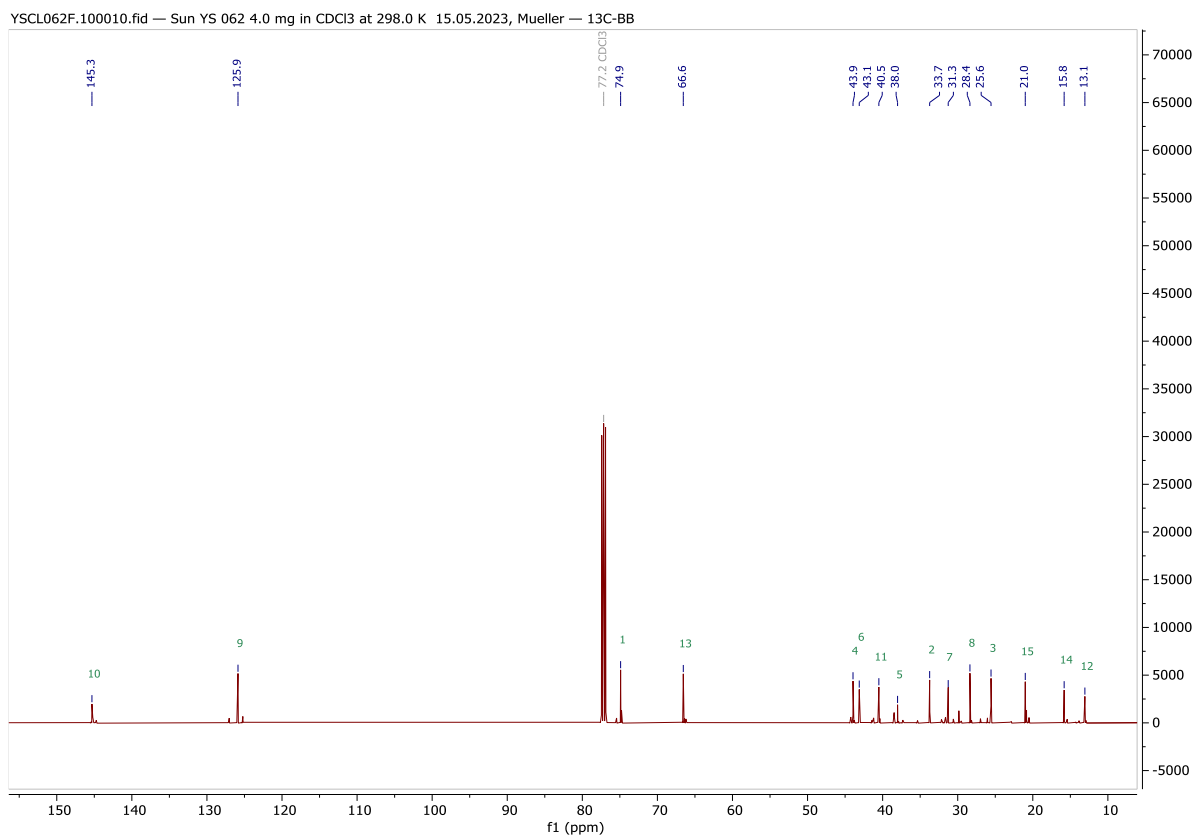

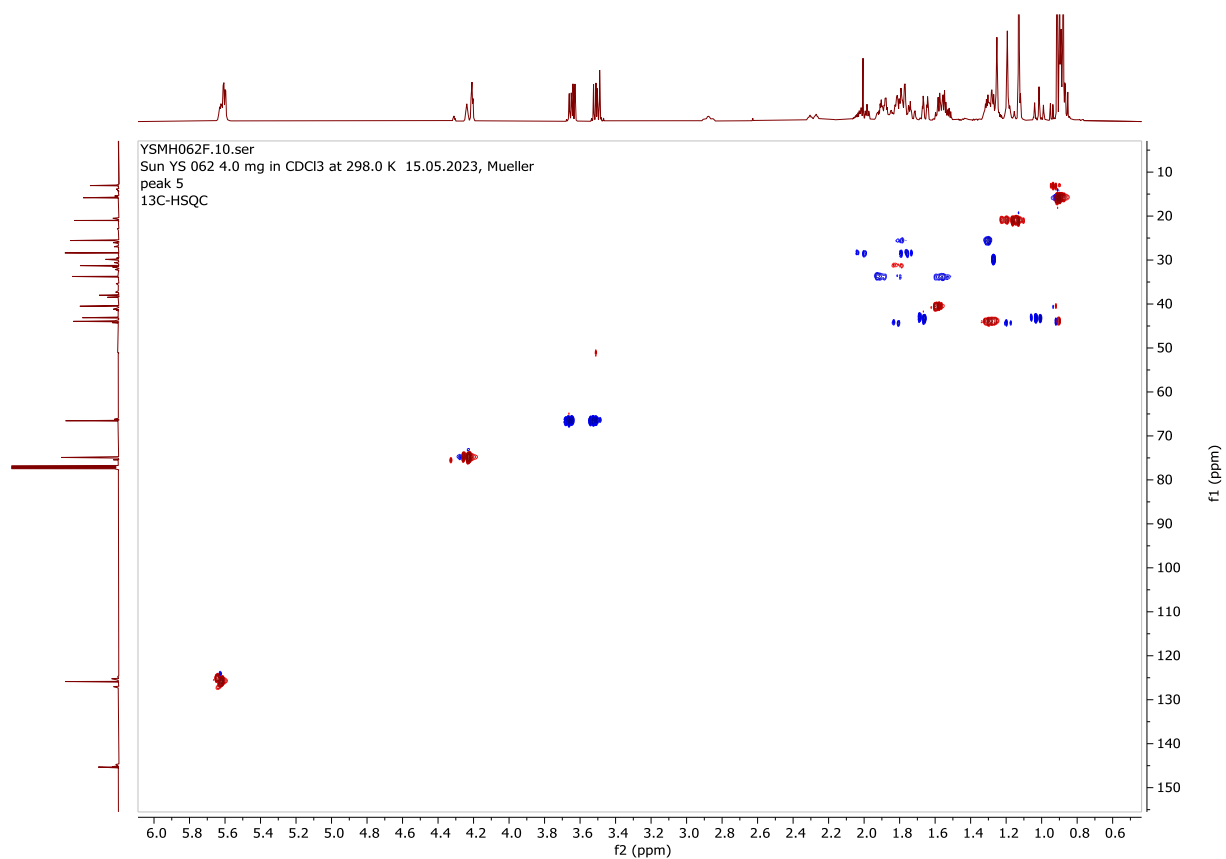

Figure S110 HSQC-spectrum of **19** recorded at 500, 125 MHz in  $\text{CDCl}_3$

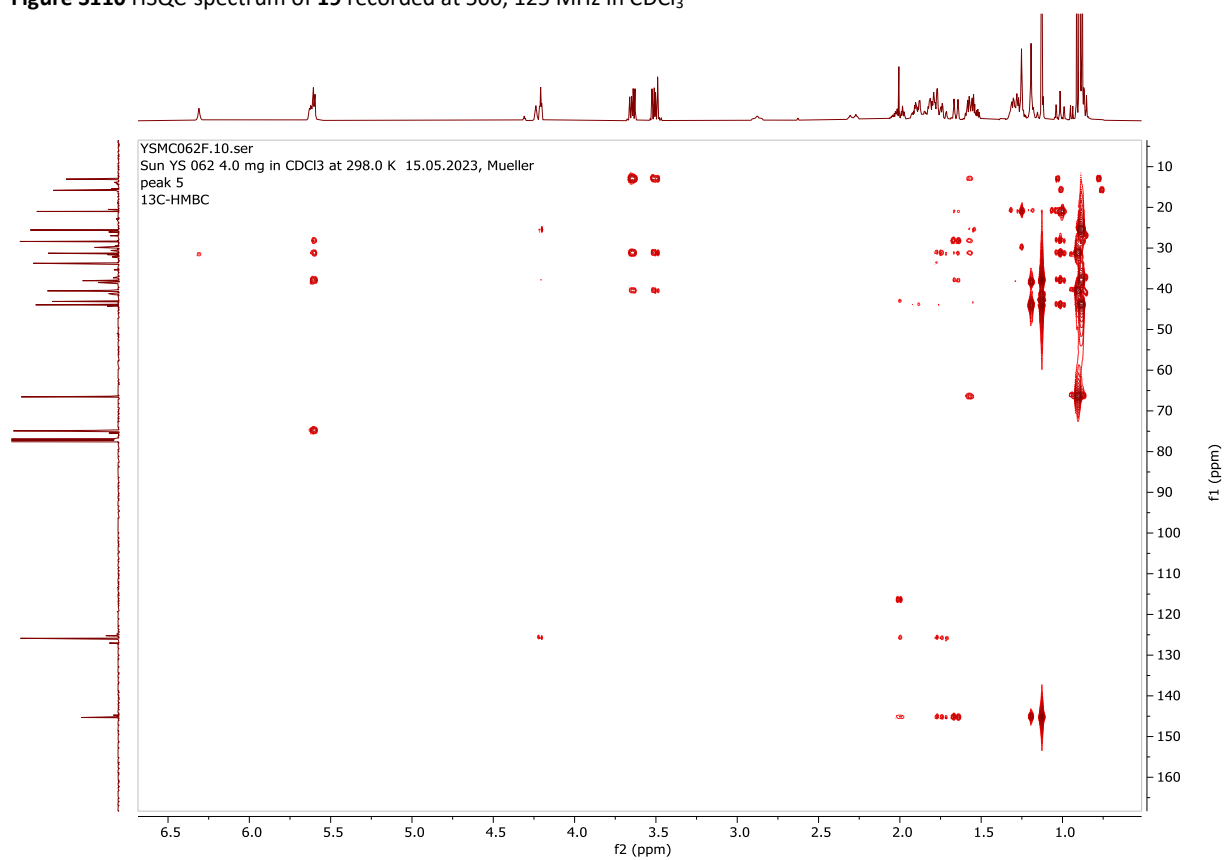

Figure S111 HMBC-spectrum of **19** recorded at 500, 125 MHz in  $\text{CDCl}_3$

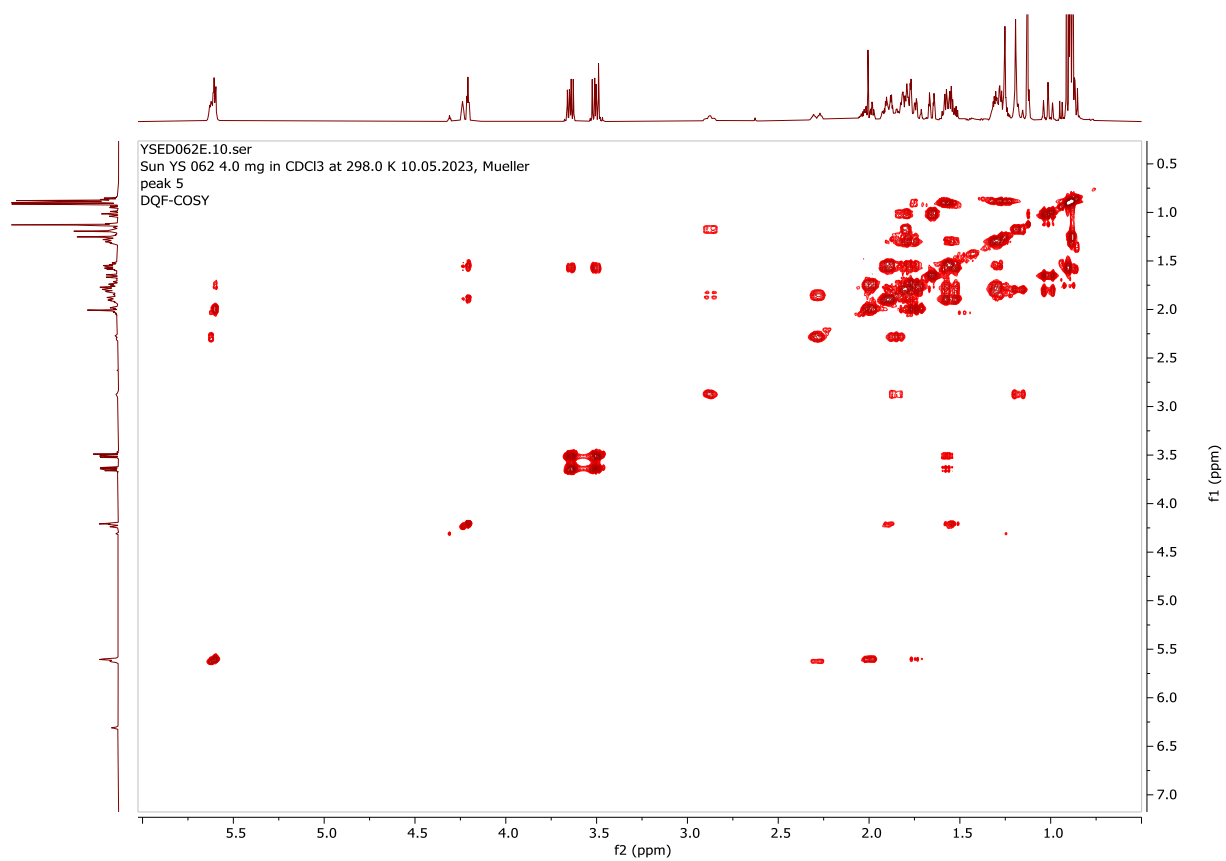

Figure S112  $^1\text{H}$ ,  $^1\text{H}$ -COSY-spectrum of **19** recorded at 500 MHz in  $\text{CDCl}_3$

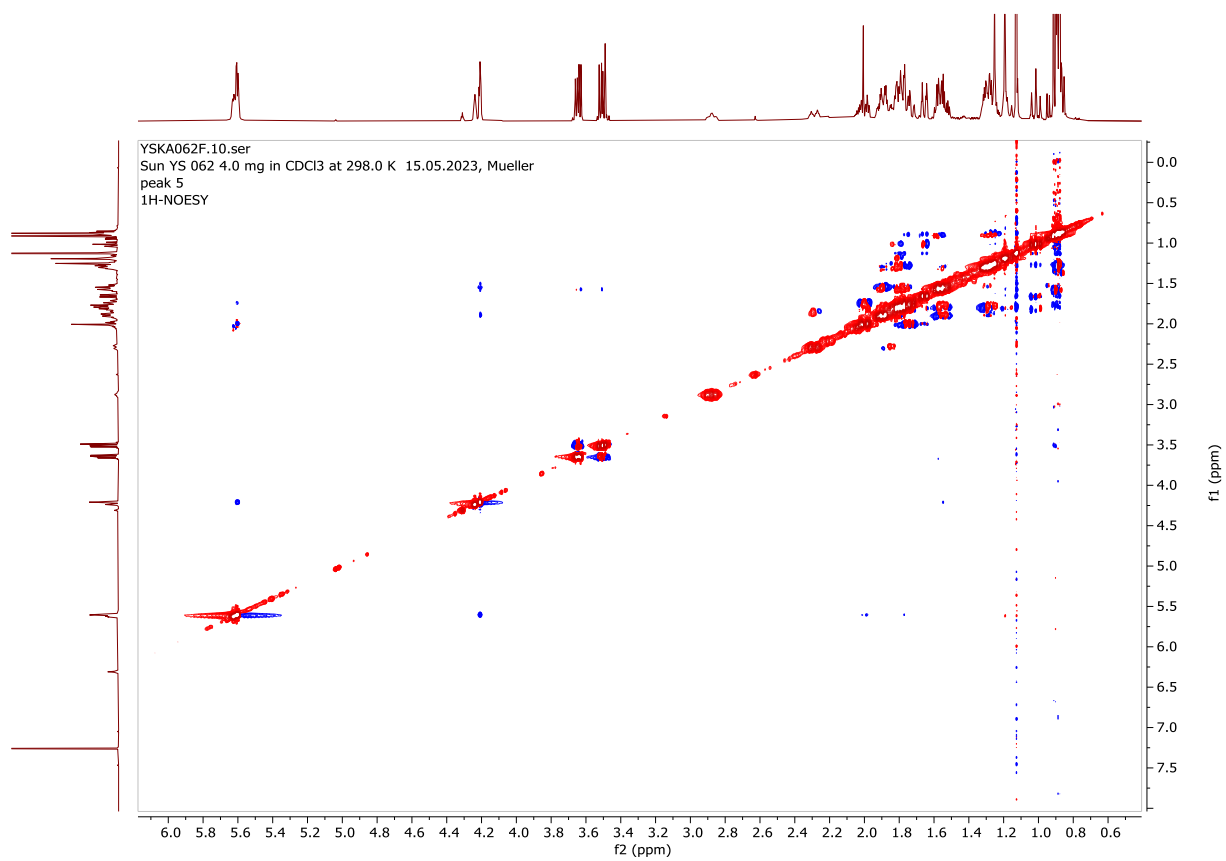

Figure S113 NOESY-spectrum of **19** recorded at 500 MHz in  $\text{CDCl}_3$

## Compound 20, 21

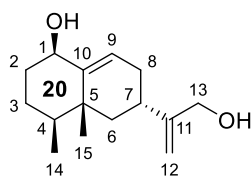

Chemical Formula: C<sub>15</sub>H<sub>24</sub>O<sub>2</sub>  
Exact Mass: 236.1776

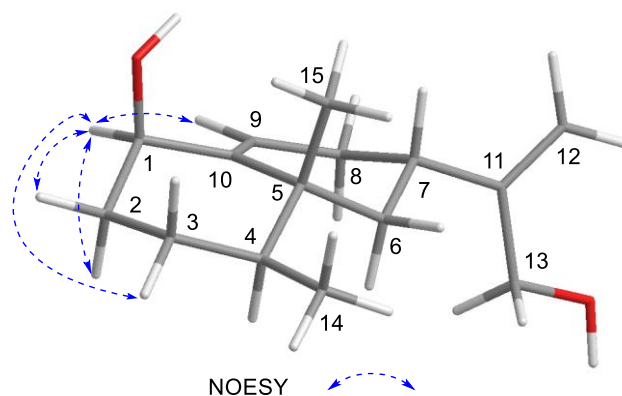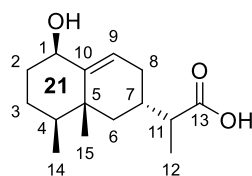

Chemical Formula: C<sub>15</sub>H<sub>24</sub>O<sub>3</sub>  
Exact Mass: 252.1725

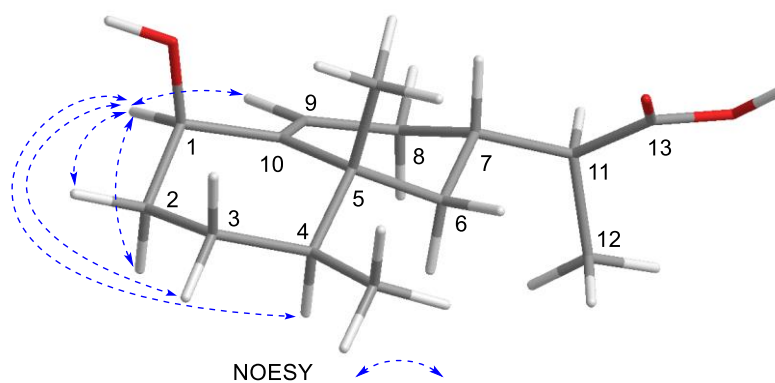

The NMR of compounds **20** and **21** were elucidated to be a mixture, where **20** has a hydroxyl group at C-13, **21** has a keto group at C-13. The <sup>13</sup>C NMR, <sup>1</sup>H NMR, and 2D NMR of **20** were assigned first (Table S24). According to protons of H-13 of **20** in HMBC, the <sup>13</sup>C shifts of C-11, C-12 and C-7 were deduced and also the proton shifts of H-7 and H-12 were found by HSQC. According to <sup>1</sup>H, <sup>1</sup>H-COSY of proton of H-7, the proton shifts of H-8 and H-6 were found, subsequently. The <sup>13</sup>C shifts of C-8 and C-6 were found by HSQC. The proton shift of H-9 was found according to the proton shift of H-8 by <sup>1</sup>H, <sup>1</sup>H-COSY. The proton shift of H-1 was found using <sup>1</sup>H, <sup>1</sup>H-COSY of the proton shift of H-9. The proton shifts of H-2, H-3 and H-4 were subsequently found. According to the HSQC, their <sup>13</sup>C shifts also were found.

The stereochemical configuration of the hydroxyl group at C-1 was deduced using their coupling constants. The coupling constants of the proton at C-1 of compounds **20** and **21** were all  $J = 3.0, 3.0$  Hz, which means the dihedral angle of  $2H'-1H-2H''$  is about 60° according to the Karplus relationship. It was deduced that both of those two compounds have an (*R*) configuration at C-1, which means the hydrogen is on the bottom of the plane. The information from NOESY was used to confirm this deduction (Figure S124).

| Compound 20 |                  |                         |                                  |             |
|-------------|------------------|-------------------------|----------------------------------|-------------|
| Pos.        | $\delta_C$ / ppm | $\delta_H$ / ppm (J/Hz) | $^1\text{H}$ - $^1\text{H}$ COSY | HMBC (H-C)  |
| 1           | 74.9             | 4.23, 1H, dd (3.0, 3.0) | 2                                | 3, 5, 9     |
| 2           | 33.7             | 1.55, 1H, m;            | 2, 1, 3                          | 3, 4        |
|             |                  | 1.90, 1H, m             | 2, 1, 3                          | 3, 4, 10    |
| 3           | 25.6             | 1.29, 1H, m;            | 3, 2                             | 1, 4, 5     |
|             |                  | 1.77, 1H, m             | 3, 2, 4                          | 1, 4, 5     |
| 4           | 43.8             | 1.29, 1H, m             | 3, 14                            | 6, 15       |
| 5           | 38.3             |                         |                                  |             |
| 6           | 43.9             | 1.21, 1H, m;            | 6, 7                             | 4, 5, 15    |
|             |                  | 1.77, 1H, m             | 6, 7                             | 4, 5, 15    |
| 7           | 33.5             | 2.40, 1H, m             | 6, 8                             | 11, 12, 13  |
| 8           | 32.1             | 1.90, 1H, m;            | 8, 7, 9                          | 6, 7, 9, 10 |
|             |                  | 2.19, 1H, m             | 8, 7, 9                          | 6, 7, 9, 10 |
| 9           | 125.5            | 5.63, 1H, dd (5.2, 2.2) | 8                                | 1, 5, 7     |
| 10          | 145.2            |                         |                                  |             |
| 11          | 153.8            |                         |                                  |             |
| 12          | 108.3            | 4.92, 1H, m;            | 12, 13                           | 7, 11, 13   |
|             |                  | 5.08, 1H, m             | 12, 13                           | 7, 11, 13   |
| 13          | 65.4             | 4.15, 2H, m             | 12                               | 7, 11, 12   |
| 14          | 15.8             | 0.89, 3H, d (6.9)       | 4                                | 3, 4, 5     |
| 15          | 21.0             | 1.15, 3H, s             |                                  | 4, 5, 10    |

Table S24 Summarized NMR signals for  $^{13}\text{C}$ ,  $^1\text{H}$ ,  $^1\text{H}$ - $^1\text{H}$  COSY, HMBC for **20** recorded in  $\text{CDCl}_3$

| Compound 21 |                  |                                     |                                  |                 |
|-------------|------------------|-------------------------------------|----------------------------------|-----------------|
| Pos.        | $\delta_C$ / ppm | $\delta_H$ / ppm (J/Hz)             | $^1\text{H}$ - $^1\text{H}$ COSY | HMBC (H-C)      |
| 1           | 74.8             | 4.21, 1H, dd (3.0, 3.0)             | 2                                | 3, 5, 9         |
| 2           | 33.8             | 1.55, 1H, m;                        | 2, 1, 3                          | 3, 4            |
|             |                  | 1.90, 1H, m                         | 2, 1, 3                          | 1, 3, 4, 10     |
| 3           | 25.5             | 1.29, 1H, m;                        | 3, 2                             | 1, 4, 5         |
|             |                  | 1.77, 1H, m                         | 3, 2, 4                          | 1, 4, 5         |
| 4           | 43.8             | 1.29, 1H, m                         | 3, 14                            | 2, 5, 6         |
| 5           | 38.0             |                                     |                                  |                 |
| 6           | 41.8             | 0.96, 1H, m;                        | 6, 7                             | 4, 5, 8, 10, 15 |
|             |                  | 1.77, 1H, m                         | 6, 7                             | 4, 5, 8, 10, 15 |
| 7           | 33.4             | 2.01, 1H, m                         | 6, 8, 11                         | 6, 11, 12       |
| 8           | 30.3             | 1.83, 1H, m;                        | 8, 7, 9                          | 7, 9, 10, 11    |
|             |                  | 2.11, 1H, m                         | 8, 7, 9                          | 6, 7, 9, 10     |
| 9           | 125.1            | 5.57, 1H, dd (5.3, 2.2)             | 8                                | 1, 5, 7, 8      |
| 10          | 145.3            |                                     |                                  |                 |
| 11          | 44.3             | 2.32, 1H, dddd (6.9, 6.9, 6.9, 6.9) | 7, 12                            | 6, 7, 8, 12, 13 |
| 12          | 14.2             | 1.21, 3H, d (7.0)                   | 11                               | 7, 11, 13       |
| 13          | 180.2            |                                     |                                  |                 |
| 14          | 15.8             | 0.89, 3H, d (6.6)                   | 4                                | 3, 4, 5         |
| 15          | 21.0             | 1.15, 3H, s                         |                                  | 4, 5, 10        |

Table S25 Summarized NMR signals for  $^{13}\text{C}$ ,  $^1\text{H}$ ,  $^1\text{H}$ - $^1\text{H}$  COSY, HMBC for **21** recorded in  $\text{CDCl}_3$

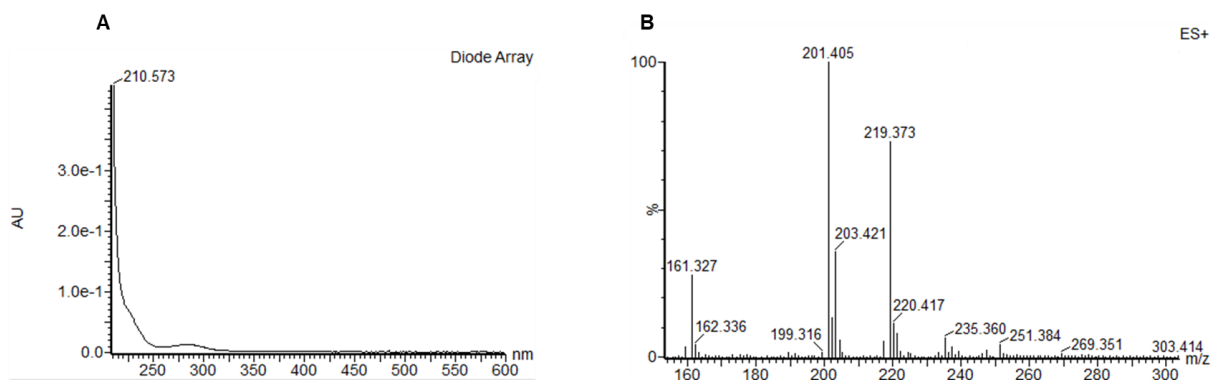

Figure S114 UV-absorption (A) and fragmentation pattern (B) of **20** in ES<sup>+</sup> TIC by LR-LCMS

### Elemental Composition Report

Page 1

#### Single Mass Analysis

Tolerance = 20.0 PPM / DBE: min = -1.5, max = 50.0

Element prediction: Off

Number of isotope peaks used for i-FIT = 3

Monoisotopic Mass, Even Electron Ions

283 formula(e) evaluated with 2 results within limits (all results (up to 1000) for each mass)

Elements Used:

C: 0-31 H: 0-45 N: 0-4 O: 0-5 S: 0-3

Sun

QToF Premier HAB321

YS 061b 672 (6.866) AM (Cen,4, 30.00, Ht,10000.0,556.28,0.70,LS 10)

1: TOF MS ES+  
1.01e+002

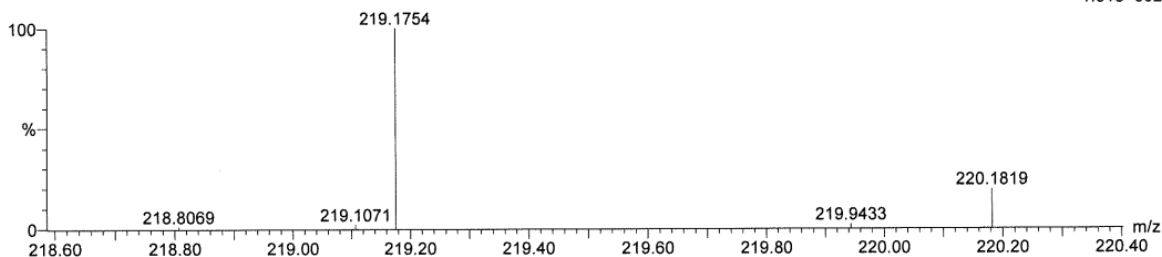

Minimum: -1.5  
Maximum: 50.0

| Mass     | Calc. Mass | mDa  | PPM   | DBE  | i-FIT | i-FIT (Norm) | Formula     |
|----------|------------|------|-------|------|-------|--------------|-------------|
| 219.1754 | 219.1749   | 0.5  | 2.3   | 4.5  | 9.7   | 0.0          | C15 H23 O   |
|          | 219.1783   | -2.9 | -13.2 | -0.5 | 14.0  | 4.3          | C12 H27 O S |

Figure S115 HRMS data for **20**;  $m/z$  (M-H<sub>2</sub>O+H)<sup>+</sup> calc. mass is 219.1749, 219.1754 was found

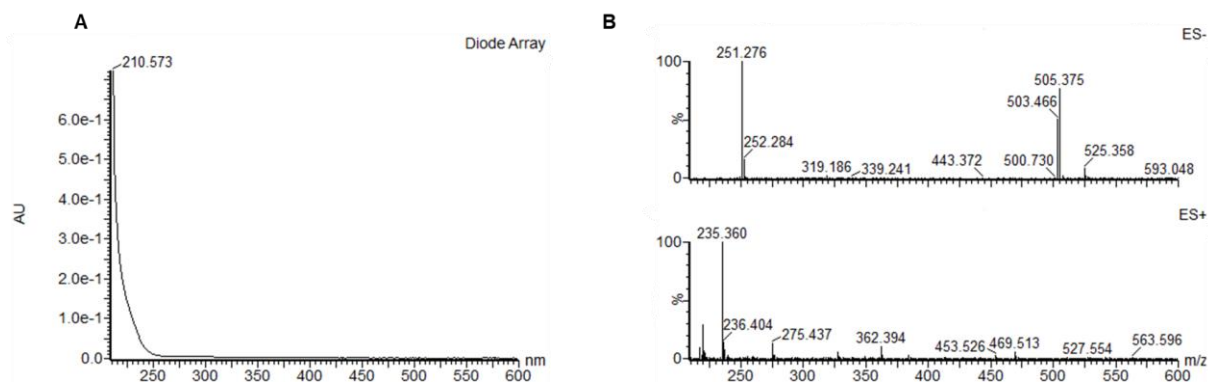

Figure S116 UV-absorption (A) and fragmentation pattern (B) of **21** in ES<sup>+</sup> TIC (bottom) and ES<sup>-</sup> TIC (top) by LR-LCMS

### Elemental Composition Report

Page 1

#### Single Mass Analysis (displaying only valid results)

Tolerance = 5.0 PPM / DBE: min = -1.5, max = 50.0

Selected filters: None

#### Monoisotopic Mass, Even Electron Ions

320 formula(e) evaluated with 1 results within limits (up to 40 closest results for each mass)

Elements Used:

C: 0-72 H: 0-50 N: 0-4 O: 0-4 Na: 0-1 Si: 0-1

Sun

LCT Premier KD070

YS 061d 17 (0.392) AM (Cen,4, 90.00, Ar,10000.0,554.26,0.70,LS 10)

1: TOF MS ES-  
1.05e3

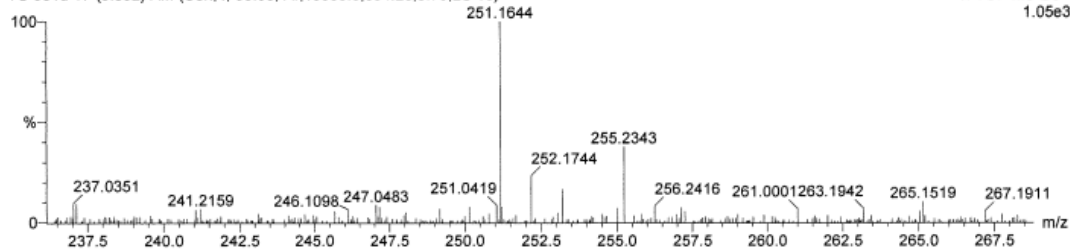

Minimum: -1.5  
Maximum: 50.0

| Mass     | Calc. Mass | mDa  | PPM  | DBE | i-FIT | Formula    |
|----------|------------|------|------|-----|-------|------------|
| 251.1644 | 251.1647   | -0.3 | -1.2 | 4.5 | 77.0  | C15 H23 O3 |

Figure S117 HRMS data for **21**;  $m/z$  (M- H)<sup>-</sup> calc. mass is 251.1647, 251.1644 was found

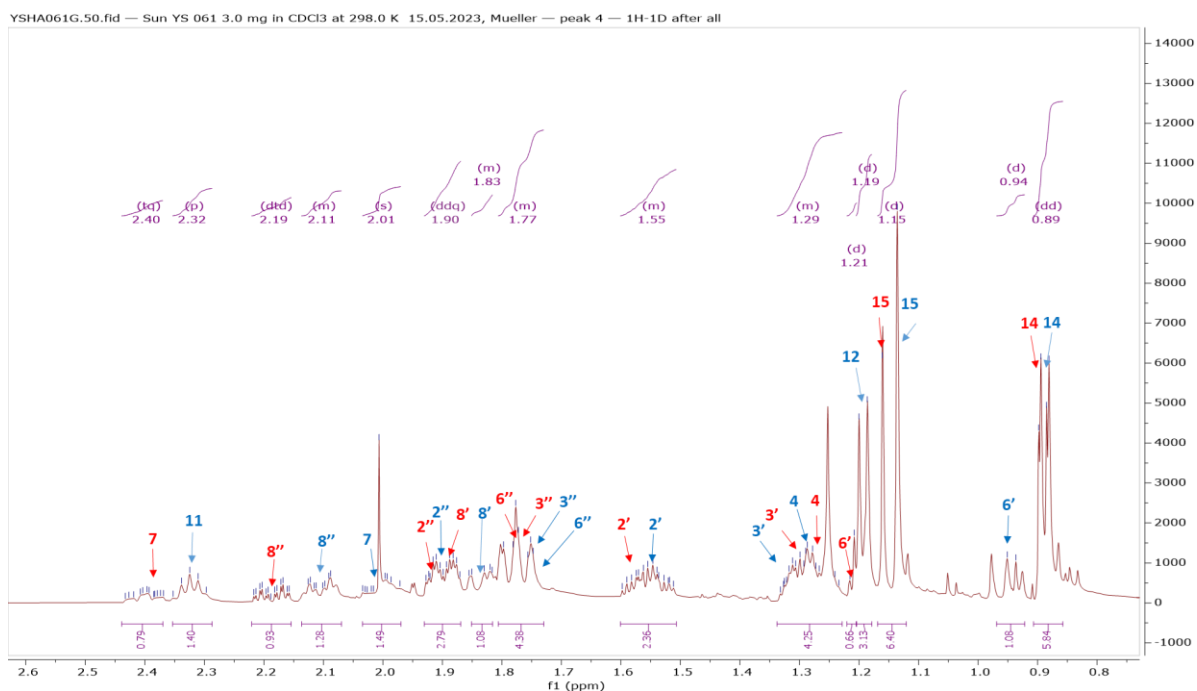

**Figure S118** <sup>1</sup>H-NMR of **20** and **21** mixture recorded at 500 MHz in CDCl<sub>3</sub>. The red numbers and arrows represent the proton positions of **20**; The blue numbers and arrows represent the proton positions of **21**. The shifts labels are on the top of the integral curves; the type of the peaks are in the brackets (0.8 ppm – 2.6 ppm).

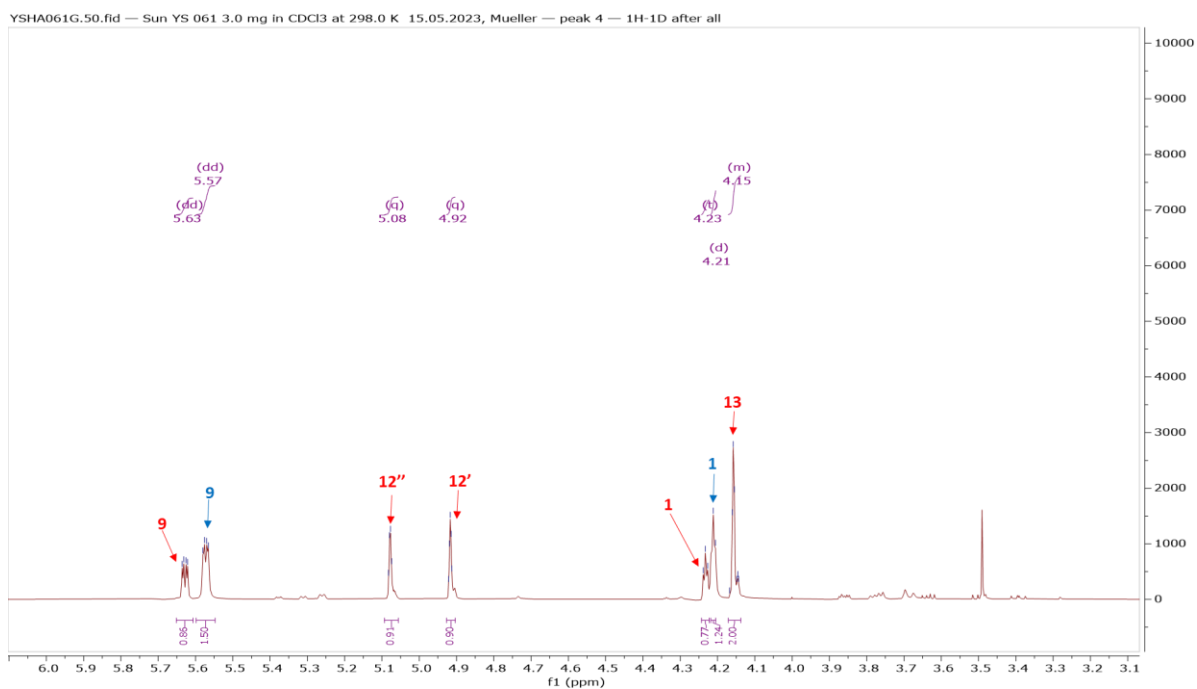

**Figure S119** <sup>1</sup>H-NMR of **20** and **21** mixture recorded at 500 MHz in CDCl<sub>3</sub>. The red numbers and arrows represent the proton positions of **20**; The blue numbers and arrows represent the proton positions of **21**. The shifts labels are on the top of the integral curves; the type of the peaks are in the brackets (3.1 ppm – 6.0 ppm).



YSCL061F.100010.fid — Sun YS 061 3.0 mg in CDCl<sub>3</sub> at 298.0 K 10.05.2023, Mueller — peak 4 — 13C-BB

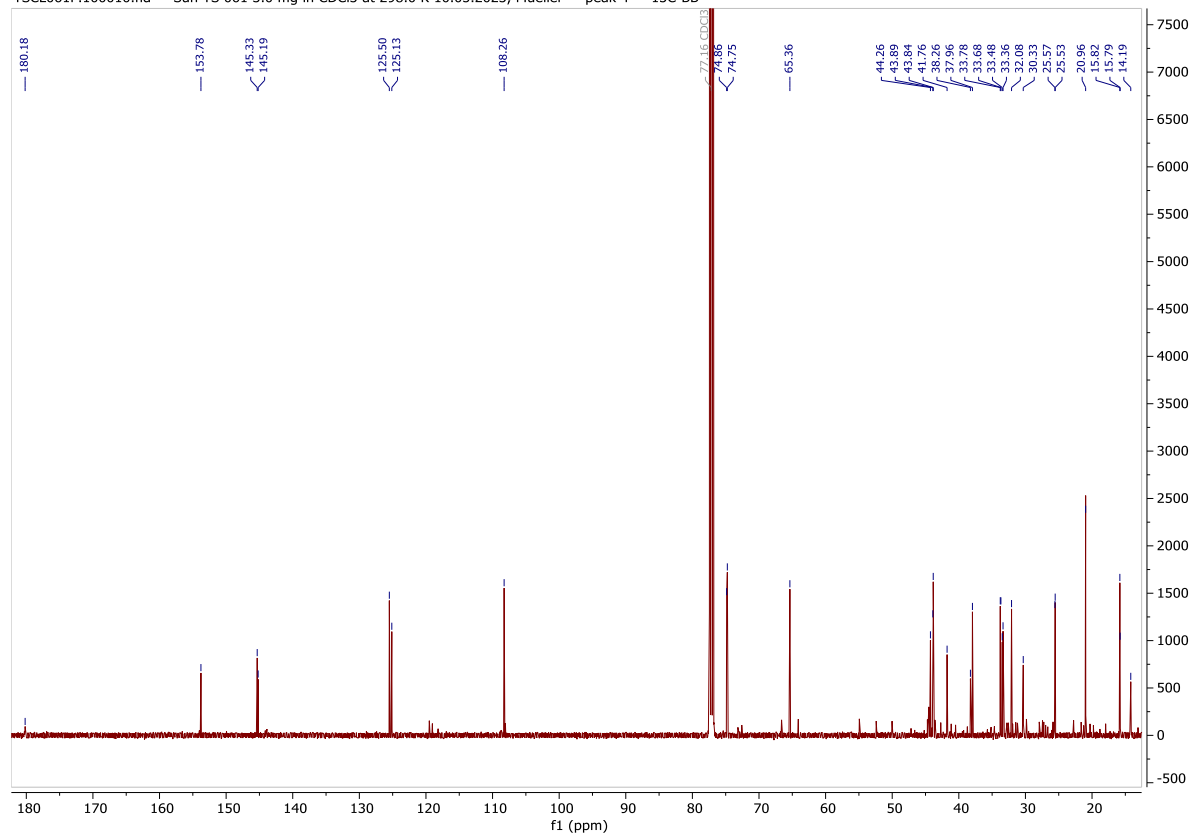

Figure S120 <sup>13</sup>C-NMR of **20** and **21** mixture recorded at 125 MHz in CDCl<sub>3</sub>

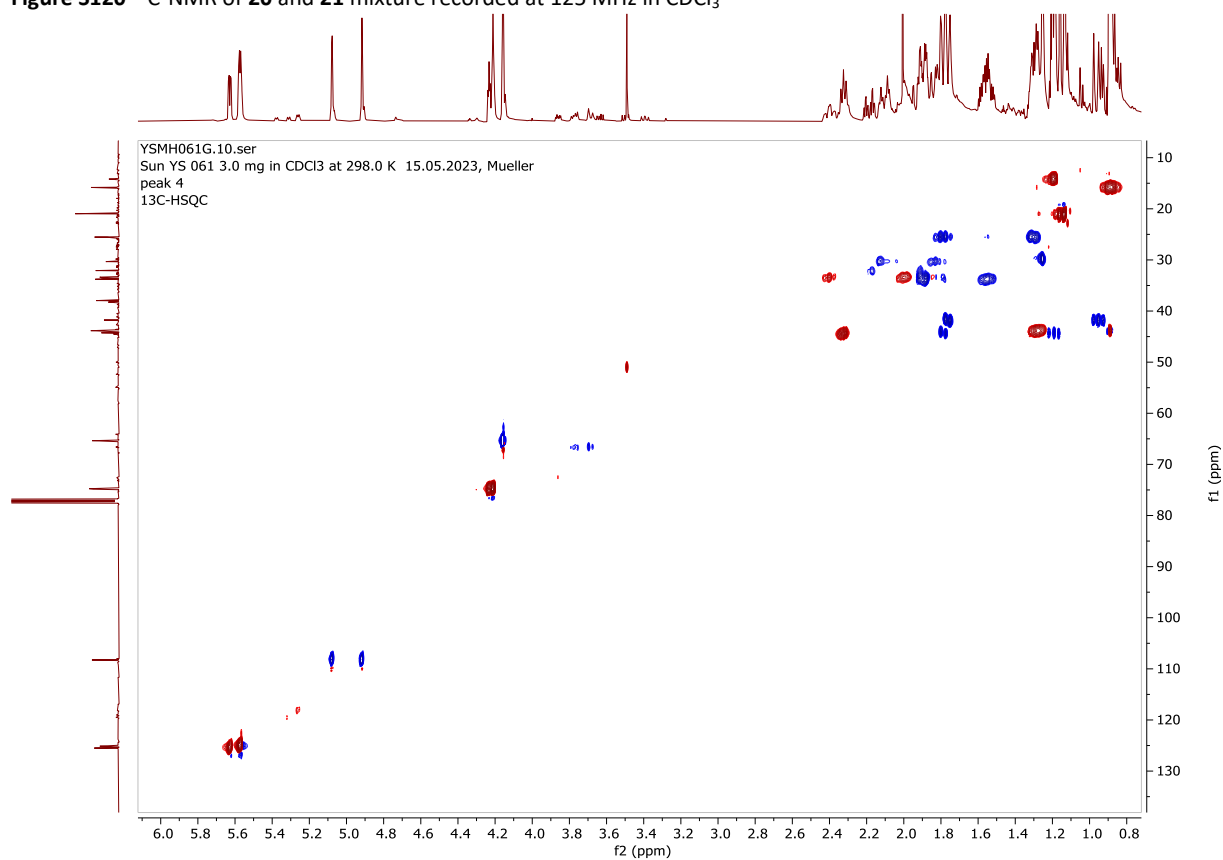

Figure S121 HSQC-spectrum of **20** and **21** mixture recorded at 500, 125 MHz in CDCl<sub>3</sub>

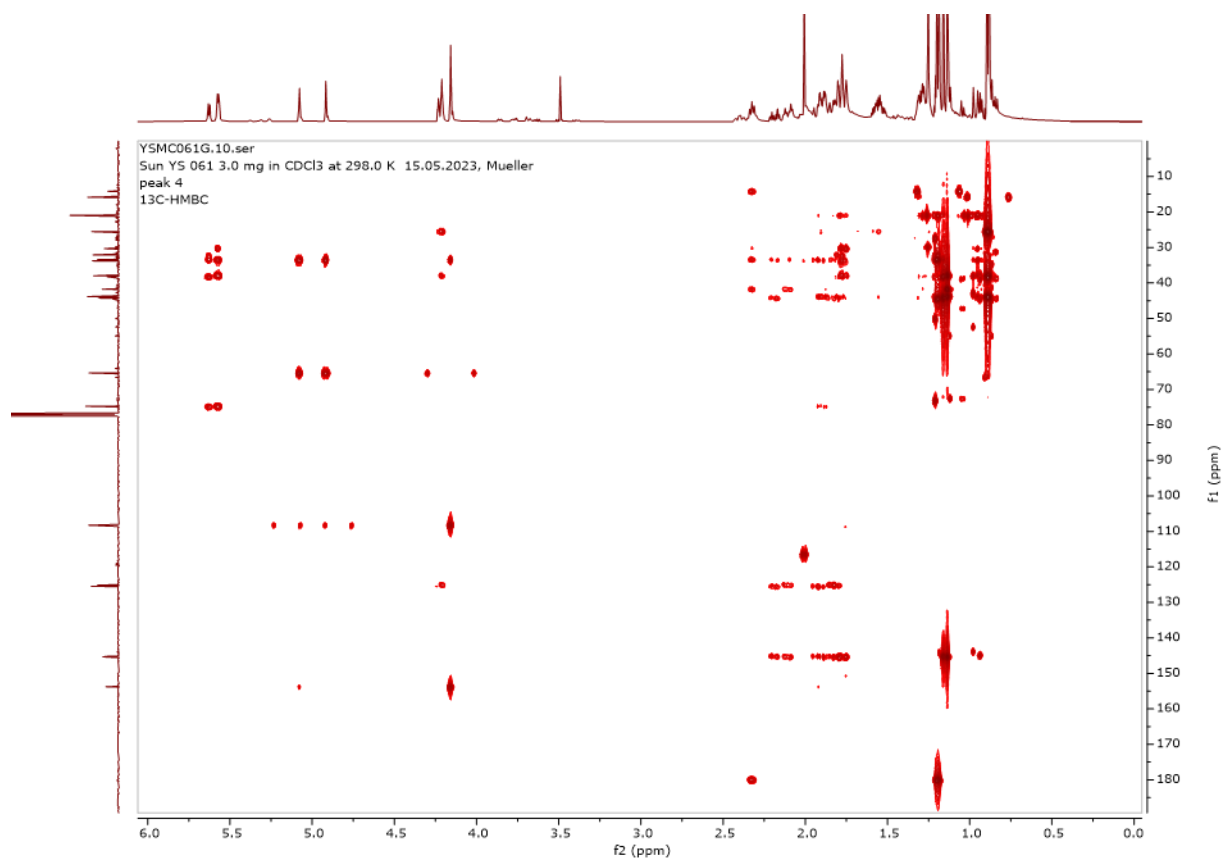

Figure S122 HMBC-spectrum of **20** and **21** mixture recorded at 500, 125 MHz in CDCl<sub>3</sub>

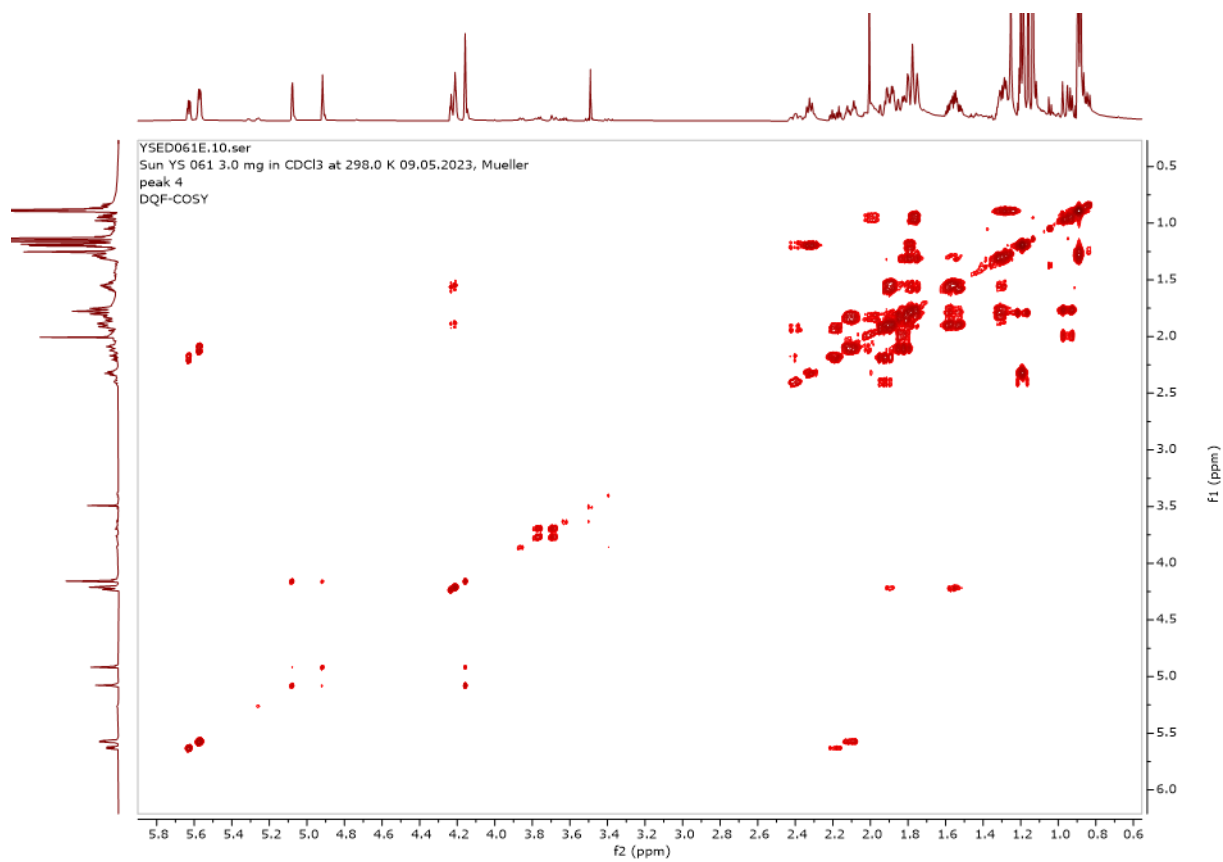

Figure S123 <sup>1</sup>H, <sup>1</sup>H-COSY-spectrum of **20** and **21** mixture recorded at 500 MHz in CDCl<sub>3</sub>

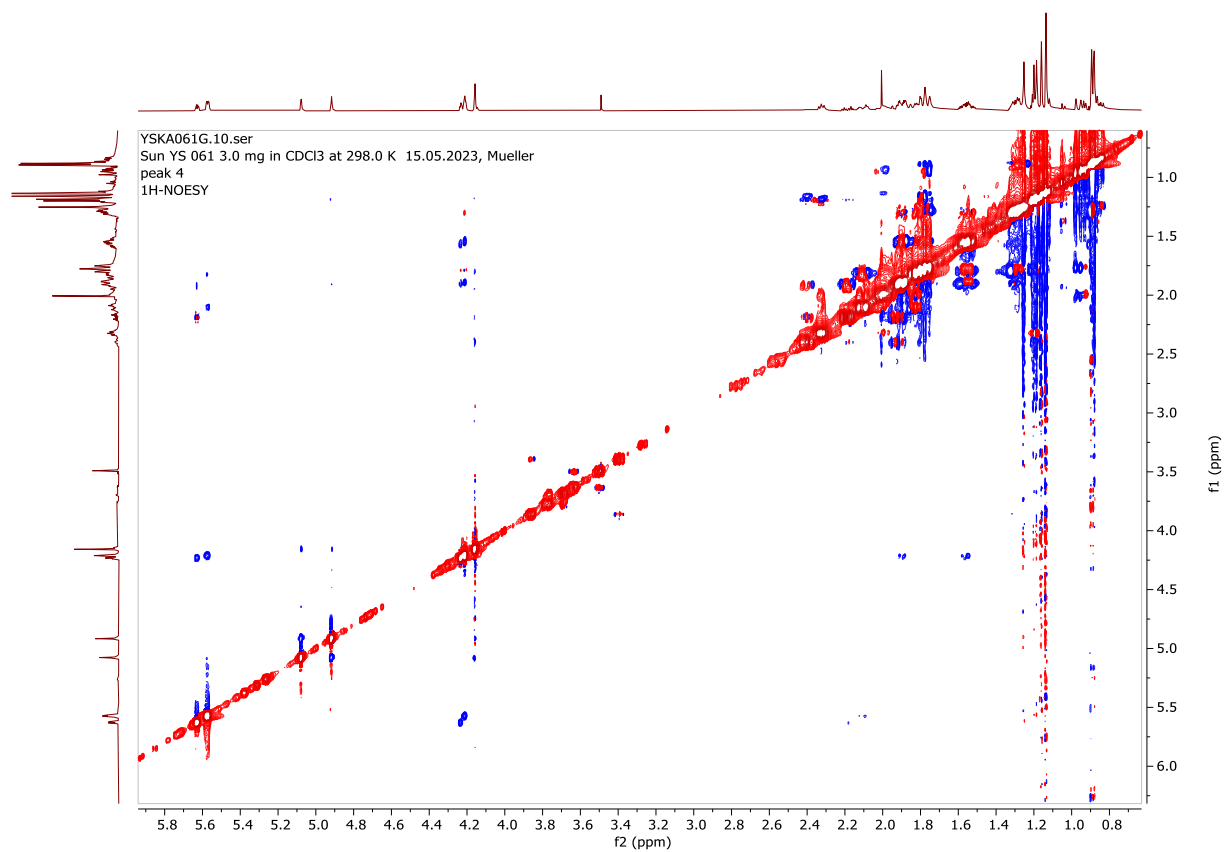

**Figure S124** NOESY-spectrum of **20** and **21** mixture recorded at 500 MHz in CDCl<sub>3</sub>

## Compound 22

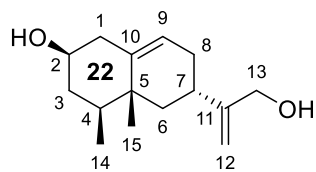

Chemical Formula: C<sub>15</sub>H<sub>24</sub>O<sub>2</sub>  
Exact Mass: 236.1776

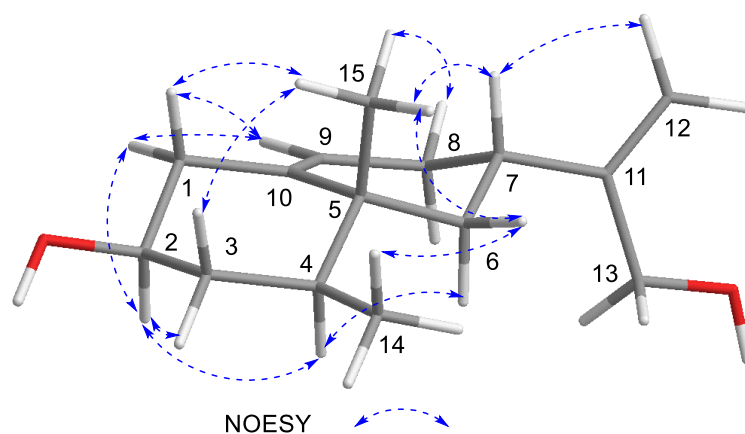

| Compound 22 |                  |                                       |                                     |                 |
|-------------|------------------|---------------------------------------|-------------------------------------|-----------------|
| Pos.        | $\delta_C$ / ppm | $\delta_H$ / ppm (J/Hz)               | <sup>1</sup> H- <sup>1</sup> H COSY | HMBC (H-C)      |
| 1           | 42.1             | 2.11, 1H, m;                          | 1, 2                                | 2, 3, 5, 9, 10  |
|             |                  | 2.34, 1H, m                           | 1, 2, 3                             | 2, 3, 5, 9, 10  |
| 2           | 71.1             | 3.57, 1H, dddd (11.0, 11.0, 4.8, 4.8) | 1, 3                                |                 |
| 3           | 40.3             | 1.37, 1H, m                           | 3, 2, 4                             | 2, 4            |
|             |                  | 1.73, 1H, dddd (11.7, 4.4, 2.4, 2.4)  | 3, 2, 4, 1                          | 1, 2, 4, 5      |
| 4           | 41.4             | 1.33, 1H, m                           | 3, 14                               |                 |
| 5           | 38.0             |                                       |                                     |                 |
| 6           | 43.3             | 1.16, 1H, m;                          | 6, 7                                | 4, 5, 7, 8, 15  |
|             |                  | 1.82, 1H, ddd (12.7, 2.3, 2.3)        | 6, 7, 8                             | 5, 7, 8, 10, 15 |
| 7           | 33.9             | 2.32, 1H, m                           | 6, 8, 12                            | 6, 8, 11, 12    |
| 8           | 32.1             | 1.9, 1H, dddd (17.2, 11.7, 3.7, 2.3); | 8, 7, 9, 6                          | 7, 9, 10        |
|             |                  | 2.11, 1H, m                           | 8, 7, 9                             | 9, 10           |
| 9           | 121.6            | 5.4, 1H, m                            | 8                                   | 7               |
| 10          | 141.5            |                                       |                                     |                 |
| 11          | 153.8            |                                       |                                     |                 |
| 12          | 108.2            | 4.91, 1H, m;                          | 12, 13                              | 7, 11, 13       |
|             |                  | 5.07, 1H, m                           | 12, 13                              | 7, 11, 13       |
| 13          | 65.4             | 4.15, 2H, dd (1.3, 1.3)               | 12                                  | 7, 11, 12       |
| 14          | 15.5             | 0.88, 3H, d (6.6)                     | 4                                   | 3, 4, 5         |
| 15          | 18.2             | 0.98, 3H, s                           |                                     | 4, 5, 6, 10     |

Table S26 Summarized NMR signals for <sup>13</sup>C, <sup>1</sup>H, <sup>1</sup>H-<sup>1</sup>H COSY, HMBC for **22** recorded in CDCl<sub>3</sub>

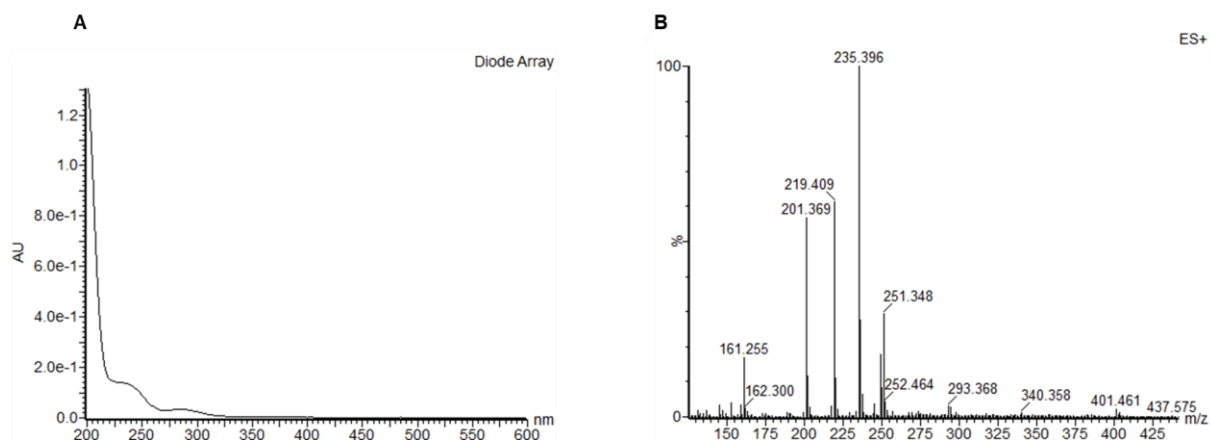

Figure S125 UV-absorption (A) and fragmentation pattern (B) of 22 in ES<sup>+</sup> TIC by LR-LCMS

Elemental Composition Report

Single Mass Analysis

Tolerance = 40.0 PPM / DBE: min = -1.5, max = 50.0

Element prediction: Off

Monoisotopic Mass, Odd and Even Electron Ions

26 formula(e) evaluated with 1 results within limits (up to 50 closest results for each mass)

Elements Used:

C: 0-25 H: 0-35 O: 0-4 Br: 0-1

Sun

YS 058 2934 (12.229) AM (Cen,5, 70.00, Ar,5000.0,190.00,1.00); Cm (2930:2941)

TOF MS Cl+  
3.88e+002

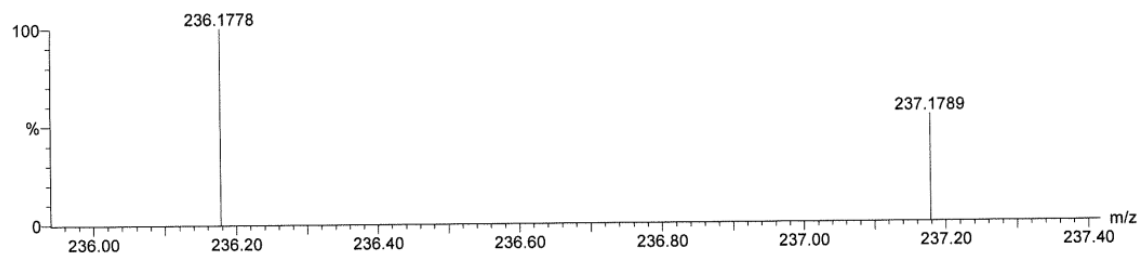

|          |            |      |     |      |           |            |
|----------|------------|------|-----|------|-----------|------------|
| Minimum: |            |      |     | -1.5 |           |            |
| Maximum: | 5.0        | 40.0 |     | 50.0 |           |            |
| Mass     | Calc. Mass | mDa  | PPM | DBE  | i-FIT     | Formula    |
| 236.1778 | 236.1776   | 0.2  | 0.8 | 4.0  | 2773078.8 | C15 H24 O2 |

Figure S126 HRMS data for 22; M calc. mass is 236.1776, 236.1778 was found by HR-GCMS

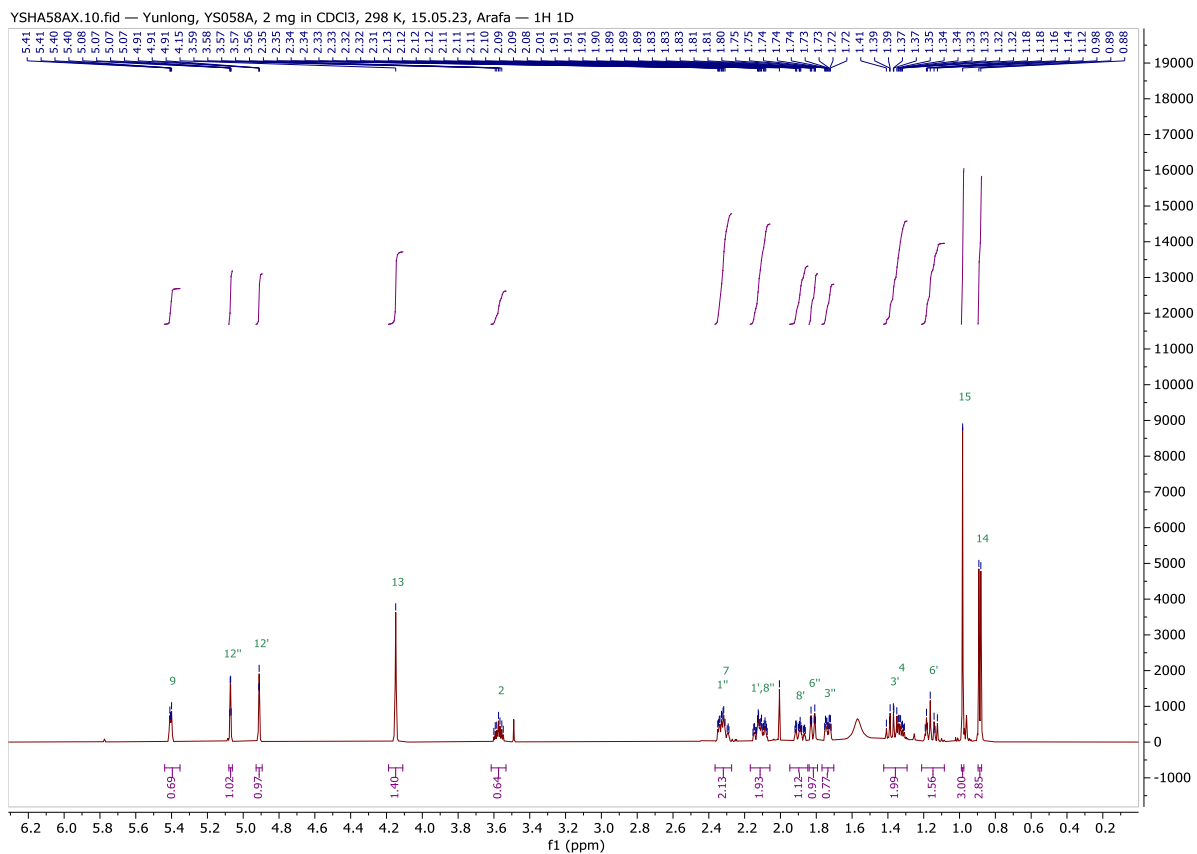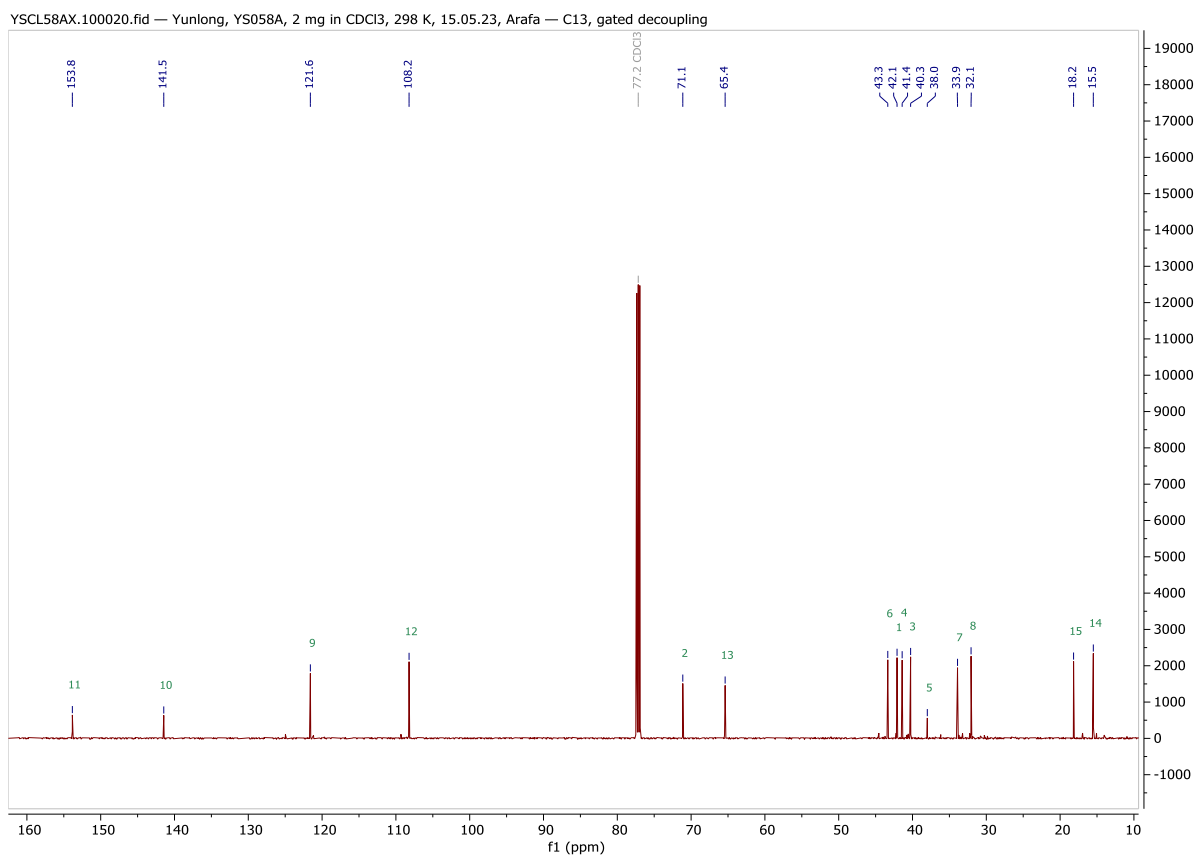

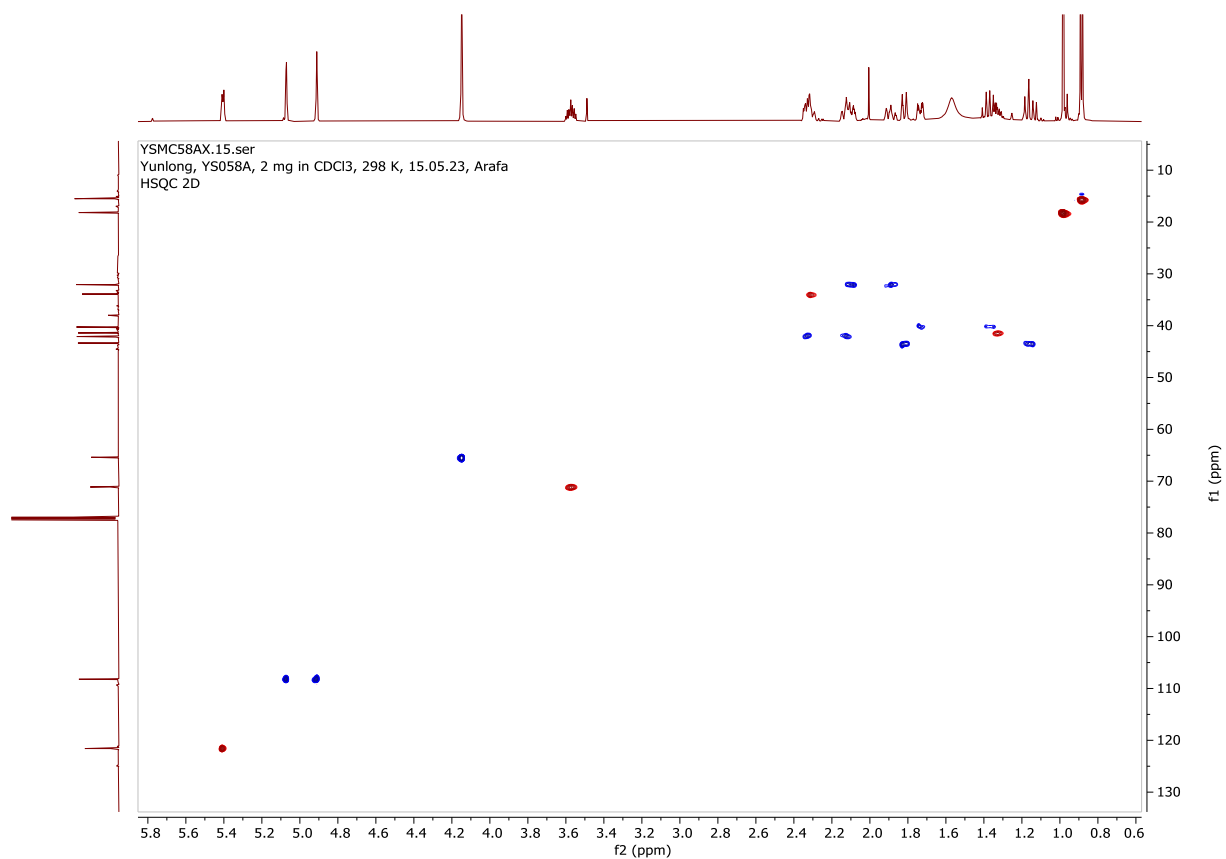

Figure S129 HSQC-spectrum of **22** recorded at 600, 150 MHz in  $\text{CDCl}_3$

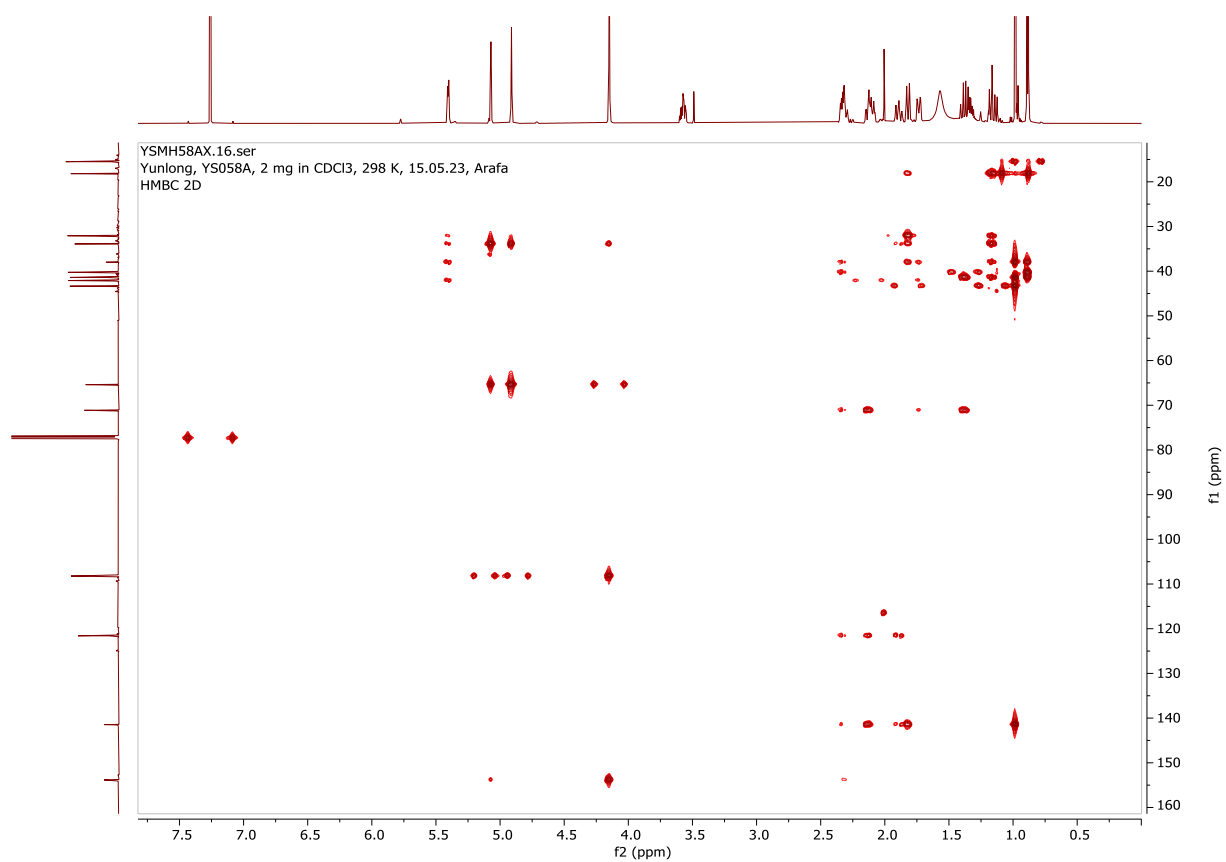

Figure S130 HMBC-spectrum of **22** recorded at 600, 150 MHz in  $\text{CDCl}_3$

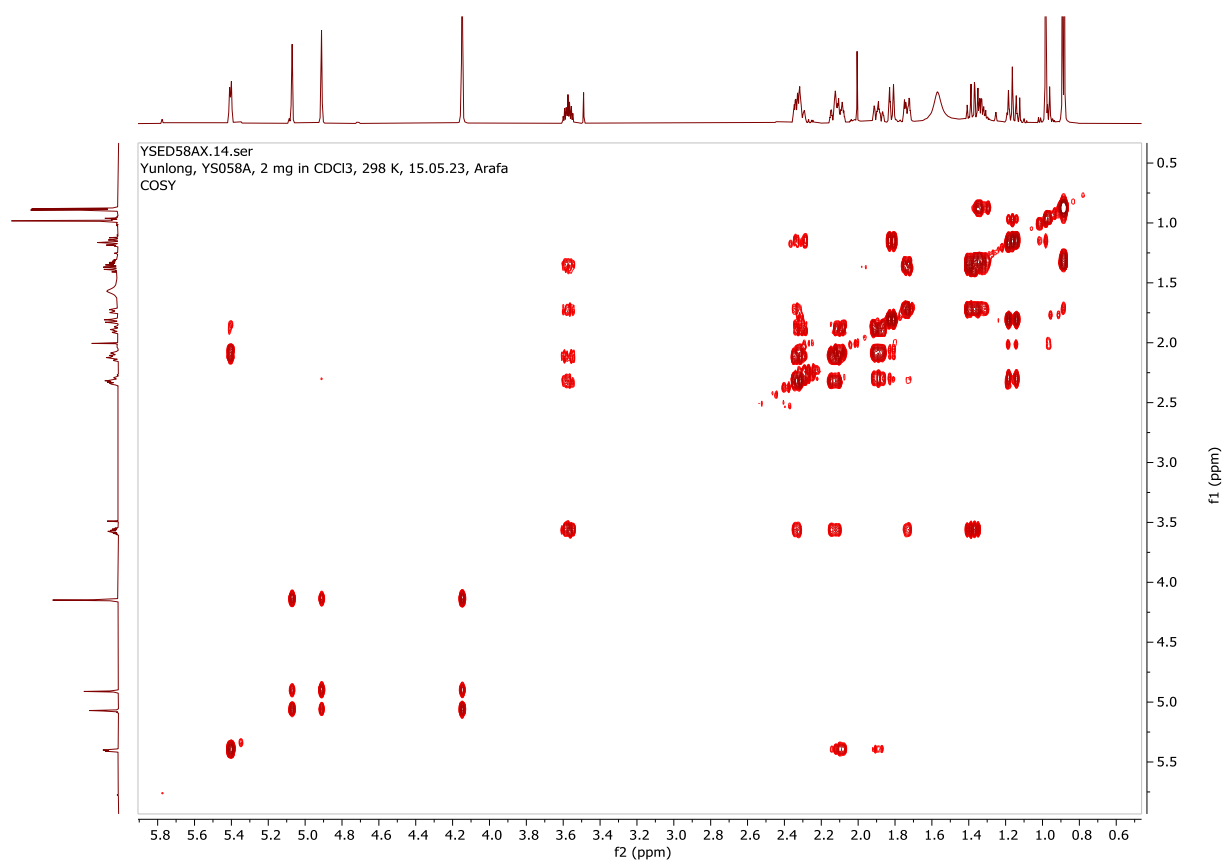

Figure S131 <sup>1</sup>H, <sup>1</sup>H-COSY-spectrum of **22** recorded at 600 MHz in CDCl<sub>3</sub>

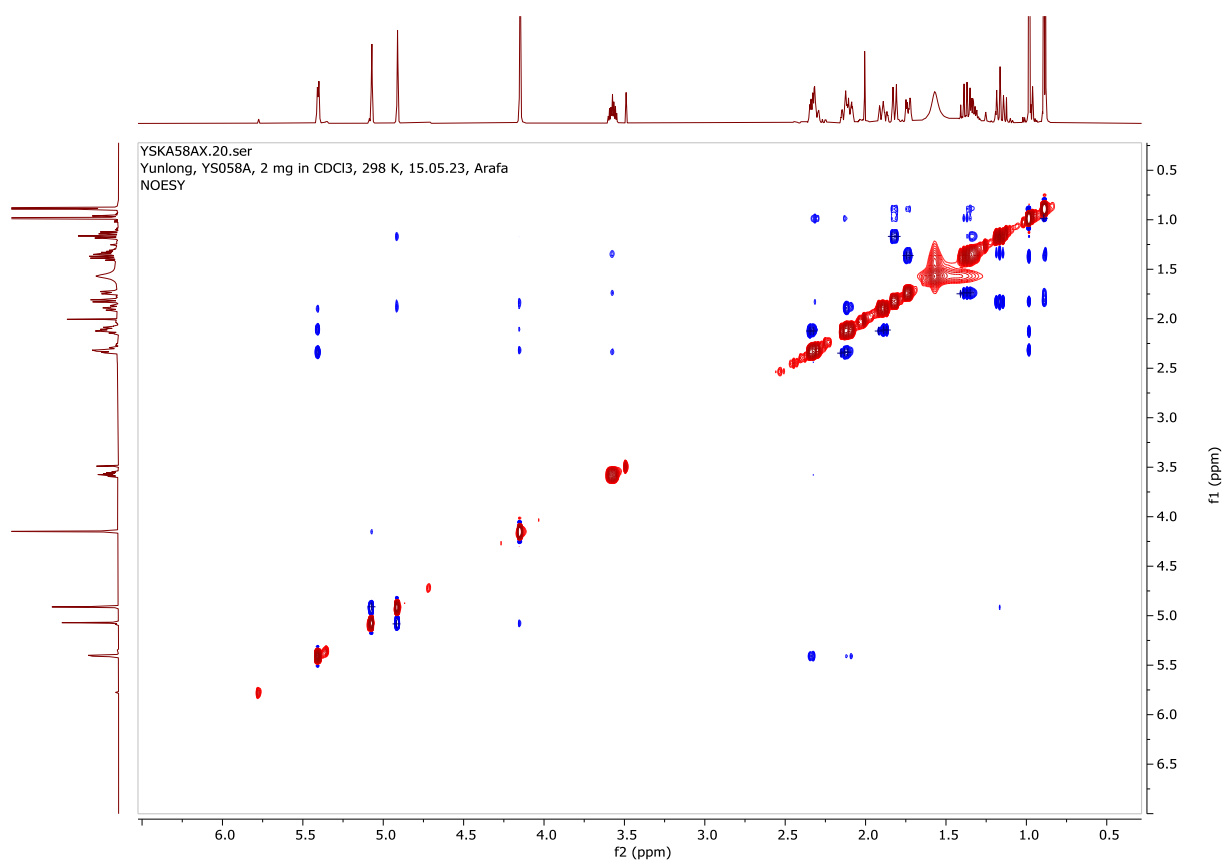

Figure S132 NOESY-spectrum of **22** recorded at 600 MHz in CDCl<sub>3</sub>



## Compound 23, 24

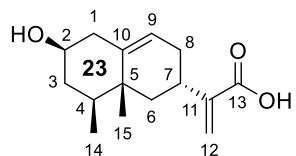

Chemical Formula:  $C_{15}H_{22}O_3$   
Exact Mass: 250.1569

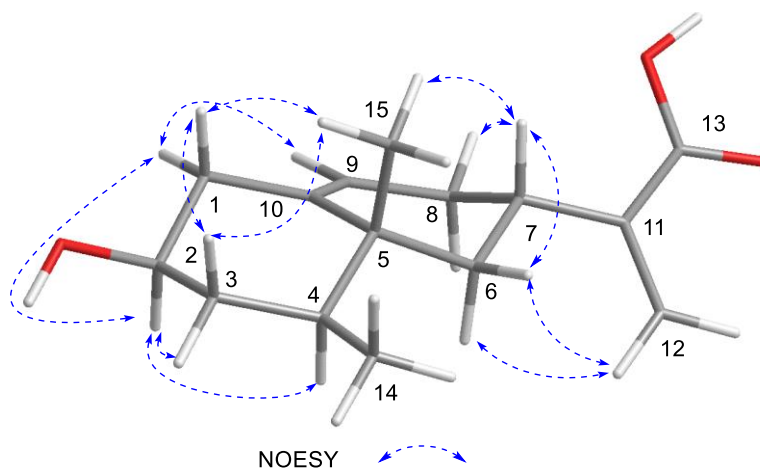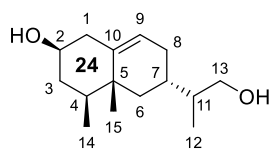

Chemical Formula:  $C_{15}H_{26}O_2$   
Exact Mass: 238.1933

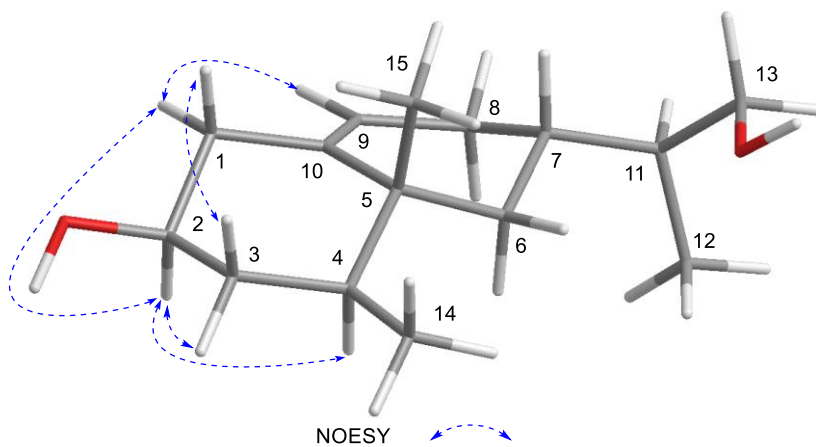

| Compound 23 |                  |                                |                    |                     |
|-------------|------------------|--------------------------------|--------------------|---------------------|
| Pos.        | $\delta_C$ / ppm | $\delta_H$ / ppm (J/Hz)        | $^1H$ - $^1H$ COSY | HMBC (H-C)          |
| 1           | 42.6             | 2.10, 1H, m;                   | 1, 2               | 2, 3, 9, 10         |
|             |                  | 2.28, 1H, ddd (12.9, 5.1, 2.3) | 1, 2, 3            | 2, 3, 5, 9, 10      |
| 2           | 71.6             | 3.45, 1H, m                    | 1, 3               | 1, 3                |
| 3           | 40.8             | 1.39, 1H, m;                   | 3, 2, 4            | 1, 2, 4, 10,        |
|             |                  | 1.70, 1H, m                    | 3, 2, 4, 1         | 1, 2, 4, 5, 10      |
| 4           | 42.7             | 1.31, 1H, m                    | 14, 3              | 3, 5, 6, 14, 15     |
| 5           | 39.3             |                                |                    |                     |
| 6           | 44.9             | 1.13, 1H, m;                   | 6, 7               | 4, 5, 7, 15         |
|             |                  | 1.84, 1H, m                    | 6, 7               | 5, 7, 15            |
| 7           | 33.3             | 2.79, 1H, m                    | 6, 8               | 5, 6, 8, 11, 12, 13 |
| 8           | 32.9             | 1.88, 1H, m;                   | 8, 7               | 7, 9, 10, 11        |
|             |                  | 2.14, 1H, m                    | 8, 7, 9            | 7, 9, 10, 11        |
| 9           | 122.2            | 5.42, 1H, m                    | 8                  | 1, 5, 7             |
| 10          | 142.9            |                                |                    |                     |
| 11          | 147.5            |                                |                    |                     |
| 12          | 123.1            | 5.55, 1H, dd (1.3, 1.3);       | 12, 7              | 7, 13               |
|             |                  | 6.17, 1H, d (1.2)              | 12                 | 7, 11, 13           |
| 13          | 170.7            |                                |                    |                     |
| 14          | 15.8             | 0.89, 3H, d (6.4)              | 4                  | 3, 4, 5             |
| 15          | 18.3             | 1.03, 3H, s                    |                    | 4, 5, 6, 10         |

Table S27 Summarized NMR signals for  $^{13}C$ ,  $^1H$ ,  $^1H$ - $^1H$  COSY, HMBC for **23** recorded in  $CD_3OD$

| Compound 24 |                  |                                |                    |                 |
|-------------|------------------|--------------------------------|--------------------|-----------------|
| Pos.        | $\delta_C$ / ppm | $\delta_H$ / ppm (J/Hz)        | $^1H$ - $^1H$ COSY | HMBC (H-C)      |
| 1           | 42.7             | 2.12, 1H, m;                   | 1, 2               | 2, 3, 9, 10     |
|             |                  | 2.26, 1H, ddd (15.5, 5.5, 2.3) | 1, 2, 3            | 2, 3, 5, 9, 10  |
| 2           | 71.7             | 3.45, 1H, m                    | 1, 3               | 1, 3            |
| 3           | 40.9             | 1.39, 1H, m;                   | 3, 2               | 2               |
|             |                  | 1.70, 1H, m                    | 3, 2, 1            | 2               |
| 4           | 42.8             | 1.31, 1H, m                    | 14                 | 3, 5, 6, 14, 15 |
| 5           | 38.8             |                                |                    |                 |
| 6           | 43.6             | 0.99, 1H, m;                   | 6, 7               | 5, 7, 15        |
|             |                  | 1.71, 1H, m                    | 6, 7               | 5, 7, 15        |
| 7           | 32.8             | 1.75, 1H, m                    | 6, 11              | 6, 8, 11        |
| 8           | 29.0             | 1.71, 1H, m;                   | 8, 9               | 7, 9, 10, 11    |
|             |                  | 1.90, 1H, m                    | 8, 9               | 7, 9, 10, 11    |
| 9           | 122.7            | 5.38, 1H, m                    | 8                  | 1, 5            |
| 10          | 142.8            |                                |                    |                 |
| 11          | 41.5             | 1.51, 1H, m                    | 7, 13              | 7, 8, 12, 13    |
| 12          | 13.3             | 0.88, 3H, d (6.4)              | 11                 | 7, 13           |
| 13          | 66.4             | 3.38, 1H, dd (10.7, 6.9);      | 13, 11             | 7, 11, 12       |
|             |                  | 3.55, 1H, dd (10.7, 5.9)       | 13, 11             | 7, 11, 12       |
| 14          | 15.8             | 0.89, 3H, d (6.4)              | 4                  | 3, 4, 5         |
| 15          | 18.4             | 0.97, 3H, s                    |                    | 5, 6, 10        |

Table S28 Summarized NMR signals for  $^{13}C$ ,  $^1H$ ,  $^1H$ - $^1H$  COSY, HMBC for **24** recorded in  $CD_3OD$

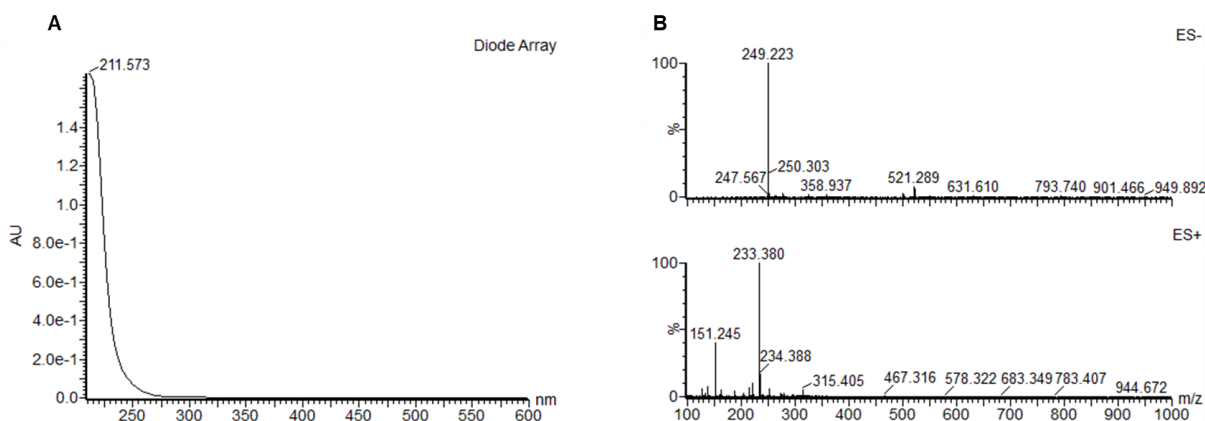

**Figure S133** UV-absorption (A) and fragmentation pattern (B) of **23** in ES<sup>+</sup> TIC (bottom) and ES<sup>-</sup> TIC (top) by LR-LCMS

### Elemental Composition Report

Page 1

#### Single Mass Analysis

Tolerance = 20.0 PPM / DBE: min = -1.5, max = 50.0

Element prediction: Off

Number of isotope peaks used for i-FIT = 3

Monoisotopic Mass, Even Electron Ions

27 formula(e) evaluated with 2 results within limits (all results (up to 1000) for each mass)

Elements Used:

C: 0-31 H: 0-45 O: 0-3 Na: 0-1

Sun

QToF Premier HAB321

YS 059A, neg 635 (6.493) AM (Cen,4, 80.00, Ht,10000.0,554.26,0.70,LS 10)

1: TOF MS ES-  
5.86e+001

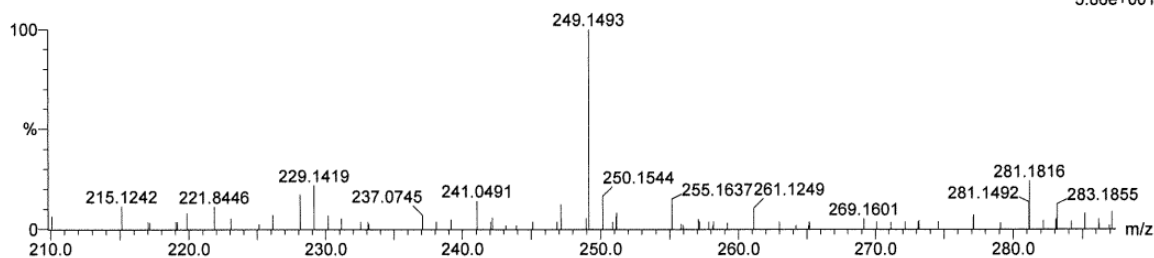

Minimum: -1.5  
 Maximum: 50.0

| Mass     | Calc. Mass | mDa | PPM  | DBE | i-FIT | i-FIT (Norm) | Formula       |
|----------|------------|-----|------|-----|-------|--------------|---------------|
| 249.1493 | 249.1491   | 0.2 | 0.8  | 5.5 | 10.1  | 0.3          | C15 H21 O3    |
|          | 249.1467   | 2.6 | 10.4 | 2.5 | 11.1  | 1.3          | C13 H22 O3 Na |

**Figure S134** HRMS data for **23**;  $m/z$  (M - H)<sup>-</sup> calc. mass is 249.1491, 249.1493 was found

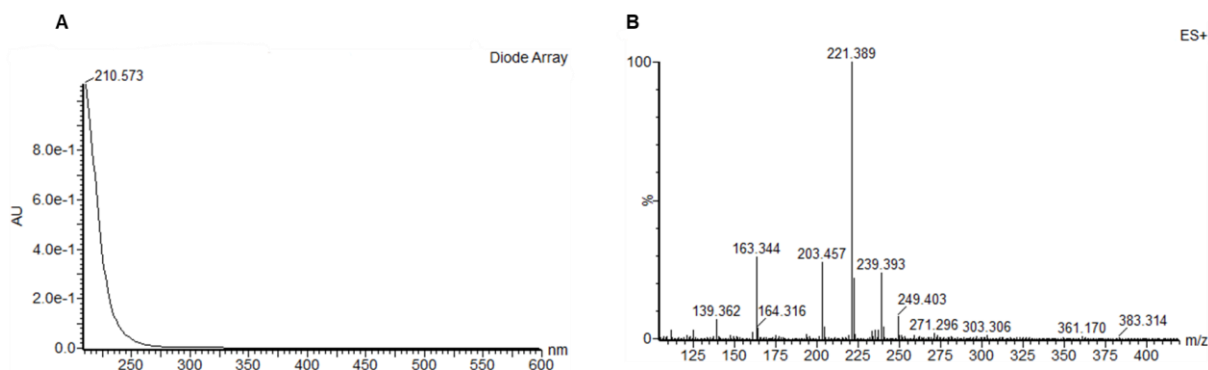

Figure S135 UV-absorption (A) and fragmentation pattern (B) of **24** in ES<sup>+</sup> TIC by LR-LCMS

## Elemental Composition Report

Page 1

### Single Mass Analysis

Tolerance = 40.0 PPM / DBE: min = -1.5, max = 50.0

Element prediction: Off

### Monoisotopic Mass, Odd and Even Electron Ions

27 formula(e) evaluated with 1 results within limits (up to 50 closest results for each mass)

Elements Used:

C: 0-25 H: 0-35 O: 0-4 Br: 0-1

Sun

YS 059B 2942 (12.262) AM (Cen,5, 70.00, Ar,5000.0,190.00,1.00); Cm (2940:2947)

TOF MS CI+  
1.50e+002

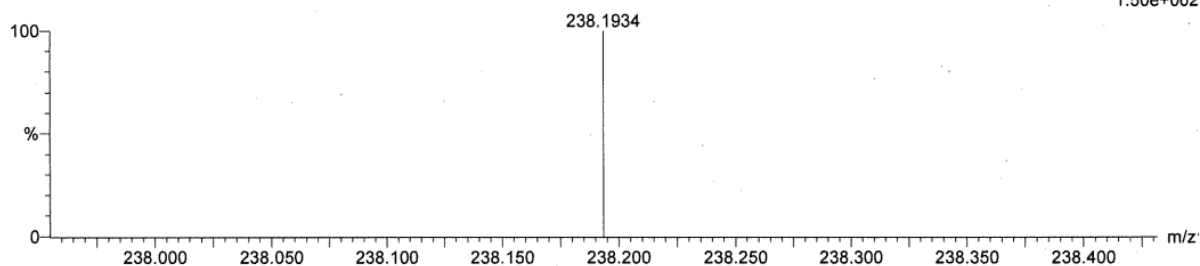

Minimum: -1.5  
Maximum: 5.0 40.0 50.0

| Mass     | Calc. Mass | mDa | PPM | DBE | i-FIT     | Formula    |
|----------|------------|-----|-----|-----|-----------|------------|
| 238.1934 | 238.1933   | 0.1 | 0.4 | 3.0 | 5546081.5 | C15 H26 O2 |

Figure S136 HRMS data for **24**; M calc. mass is 238.1933, 238.1934 was found by HR-GCMS

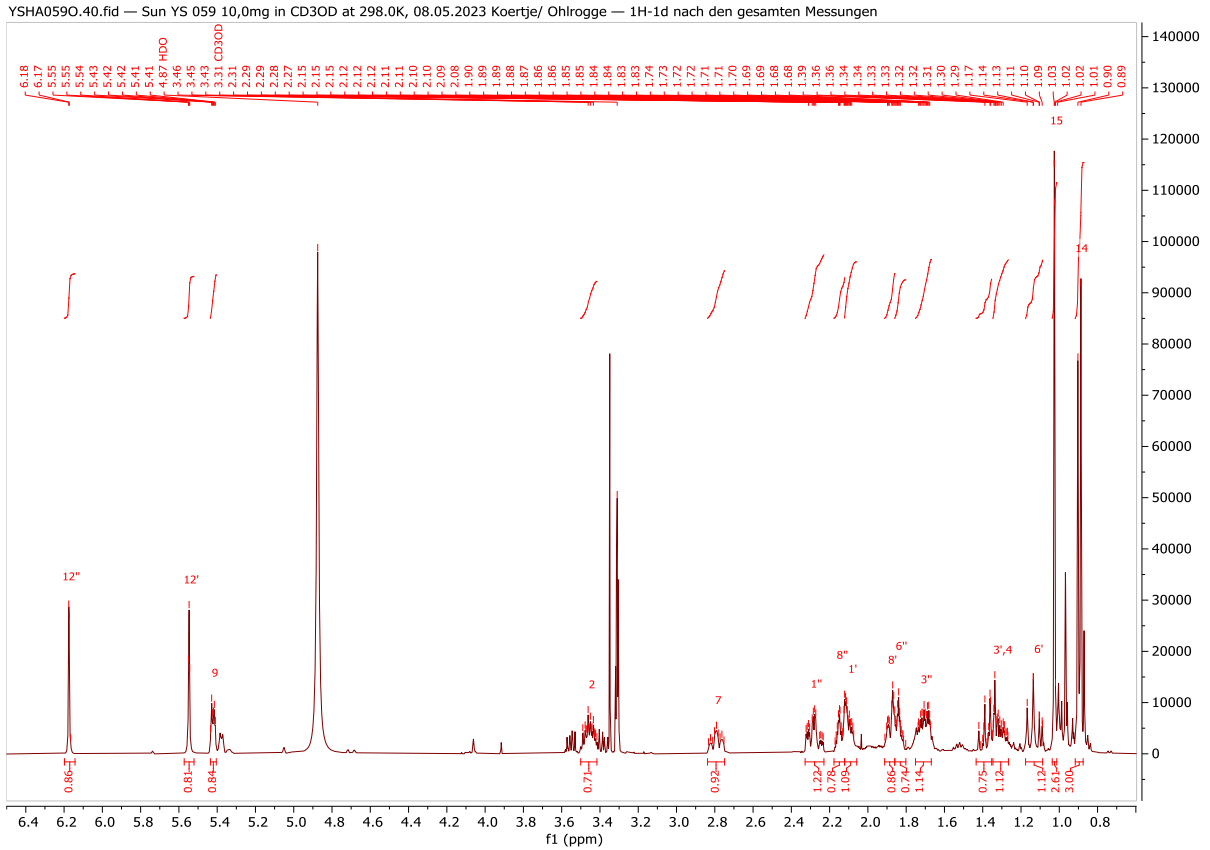

Figure S137 <sup>1</sup>H-NMR of **23** and **24** mixture recorded at 400 MHz in CD<sub>3</sub>OD. The proton positions of **23** were labelled in red.

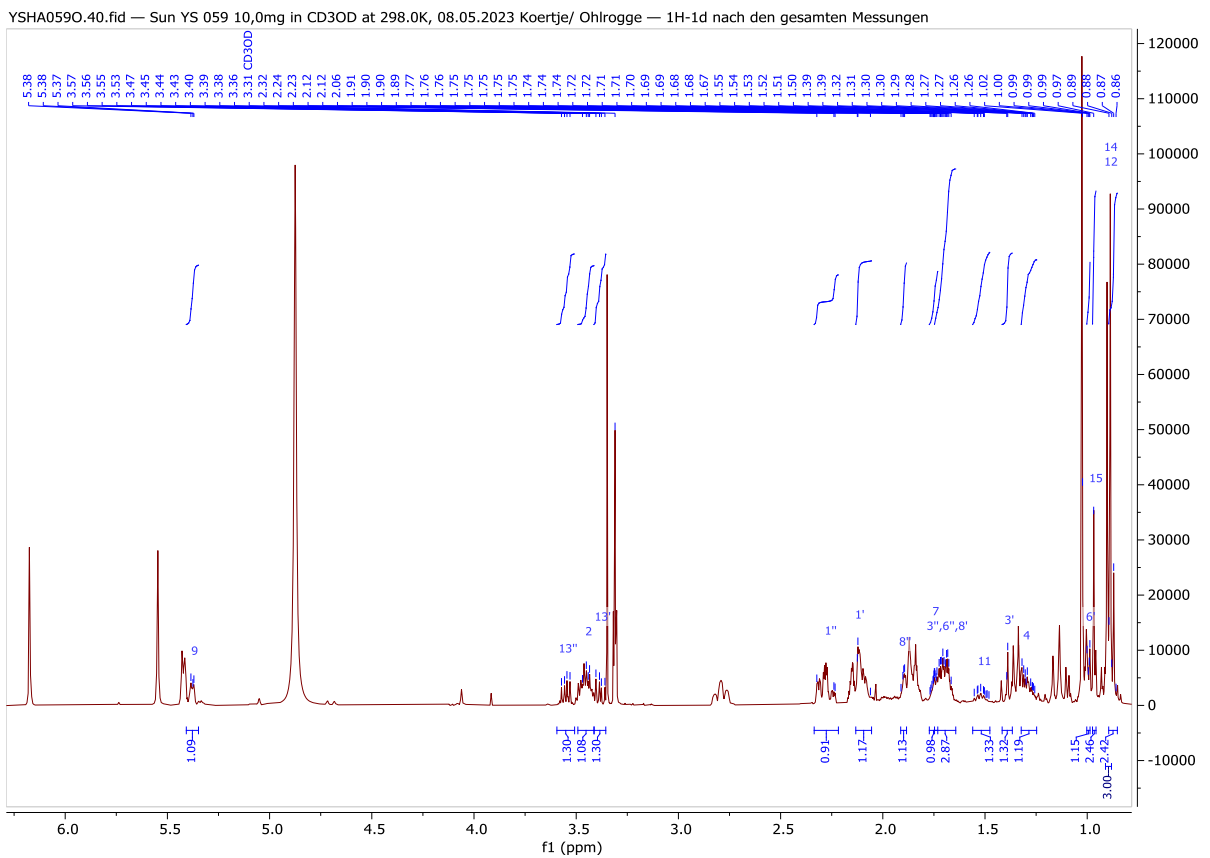

Figure S138 <sup>1</sup>H-NMR of **23** and **24** mixture recorded at 400 MHz in CD<sub>3</sub>OD. The proton positions of **24** were labelled in blue.

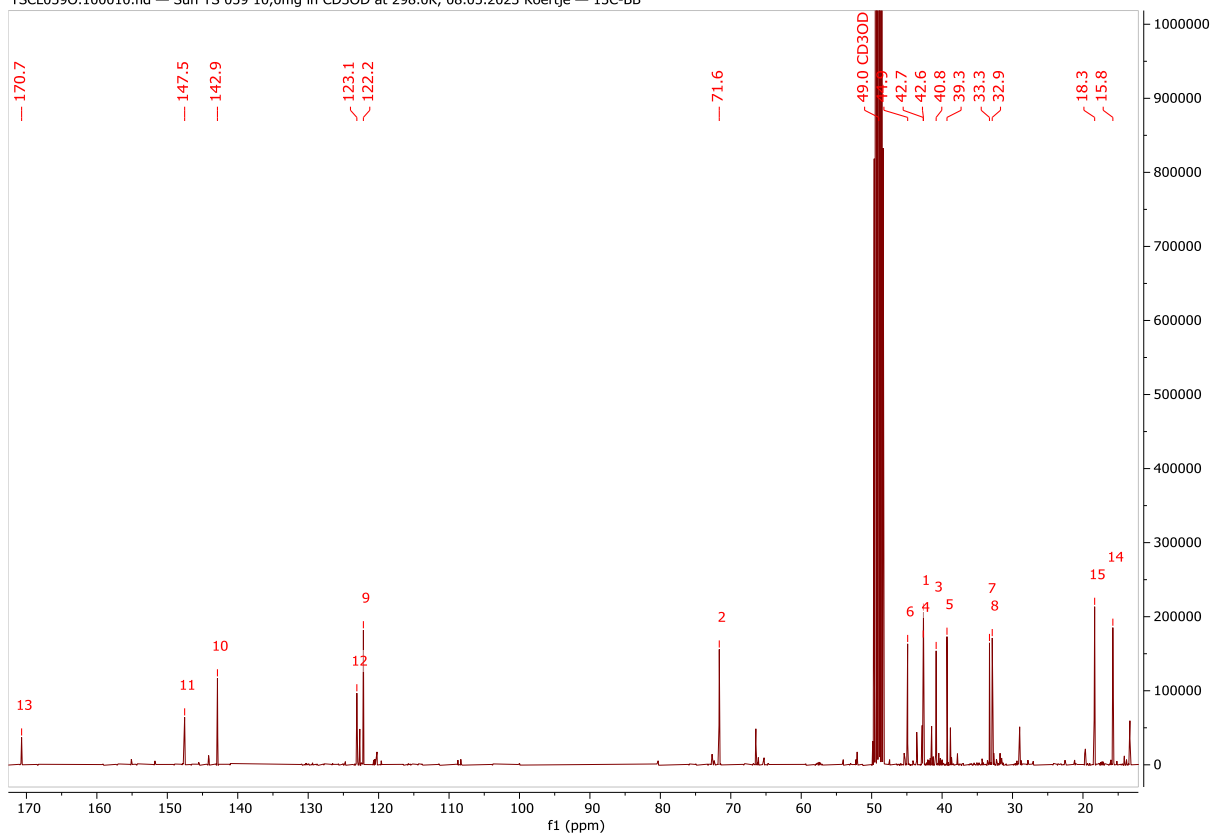

Figure S139  $^{13}\text{C}$ -NMR of **23** and **24** mixture recorded at 100 MHz in  $\text{CD}_3\text{OD}$ . The carbon positions of **23** were labelled in red.

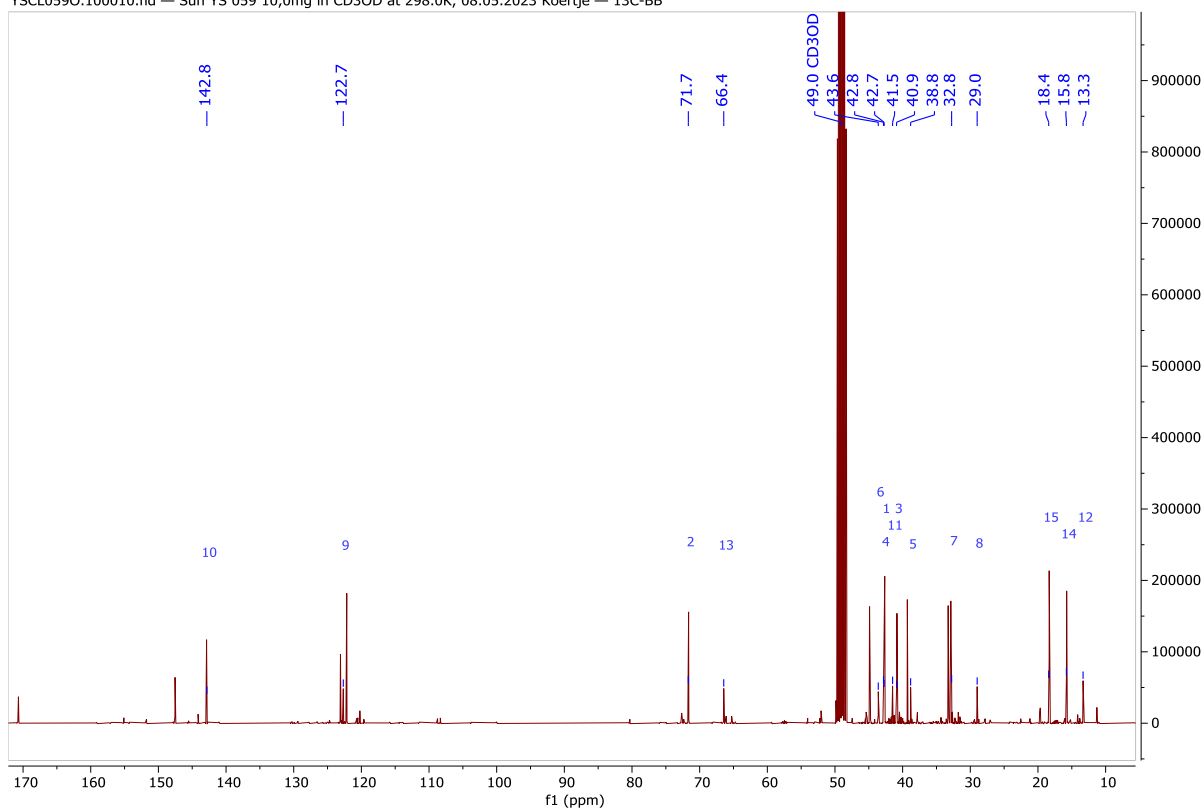

Figure S140  $^{13}\text{C}$ -NMR of **23** and **24** mixture recorded at 100 MHz in  $\text{CD}_3\text{OD}$ . The carbon positions of **24** were labelled in blue.

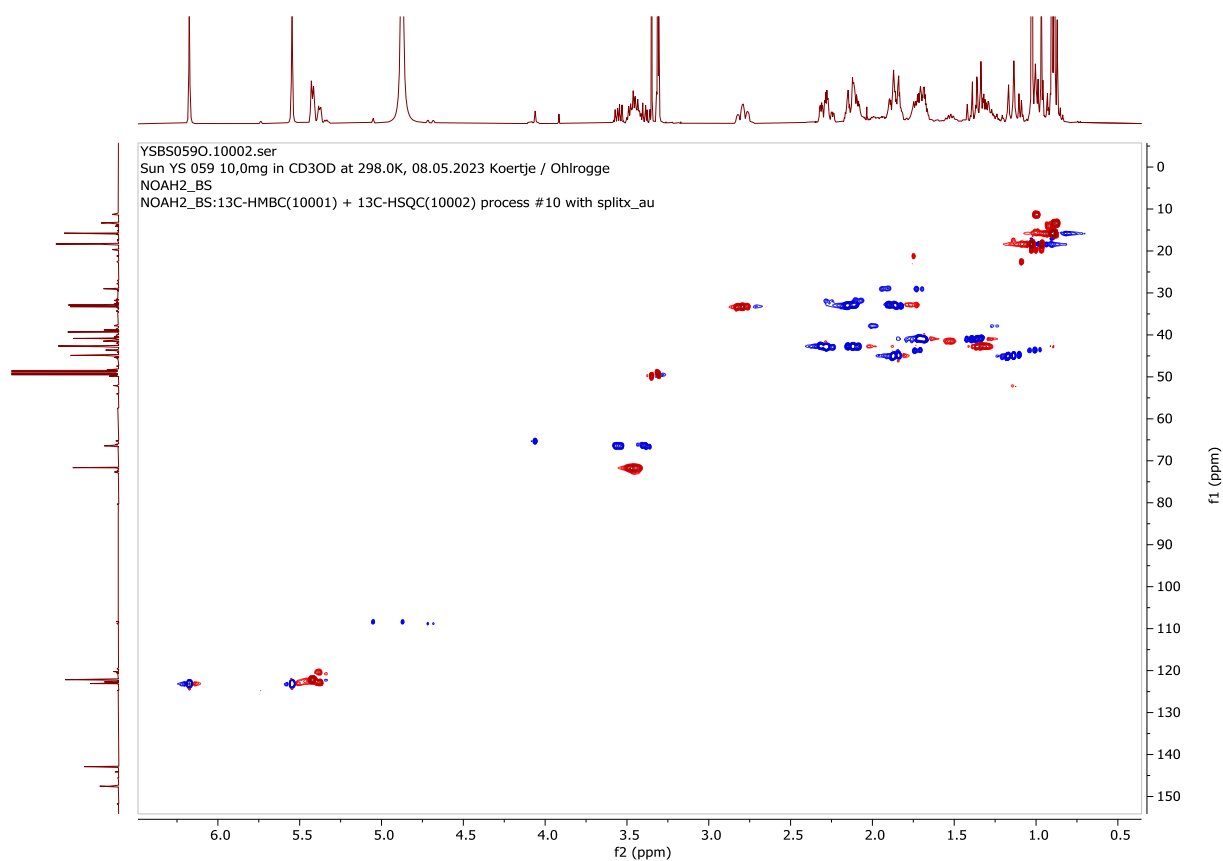

Figure S141 HSQC-spectrum of **23** and **24** mixture recorded at 400, 100 MHz in CD<sub>3</sub>OD

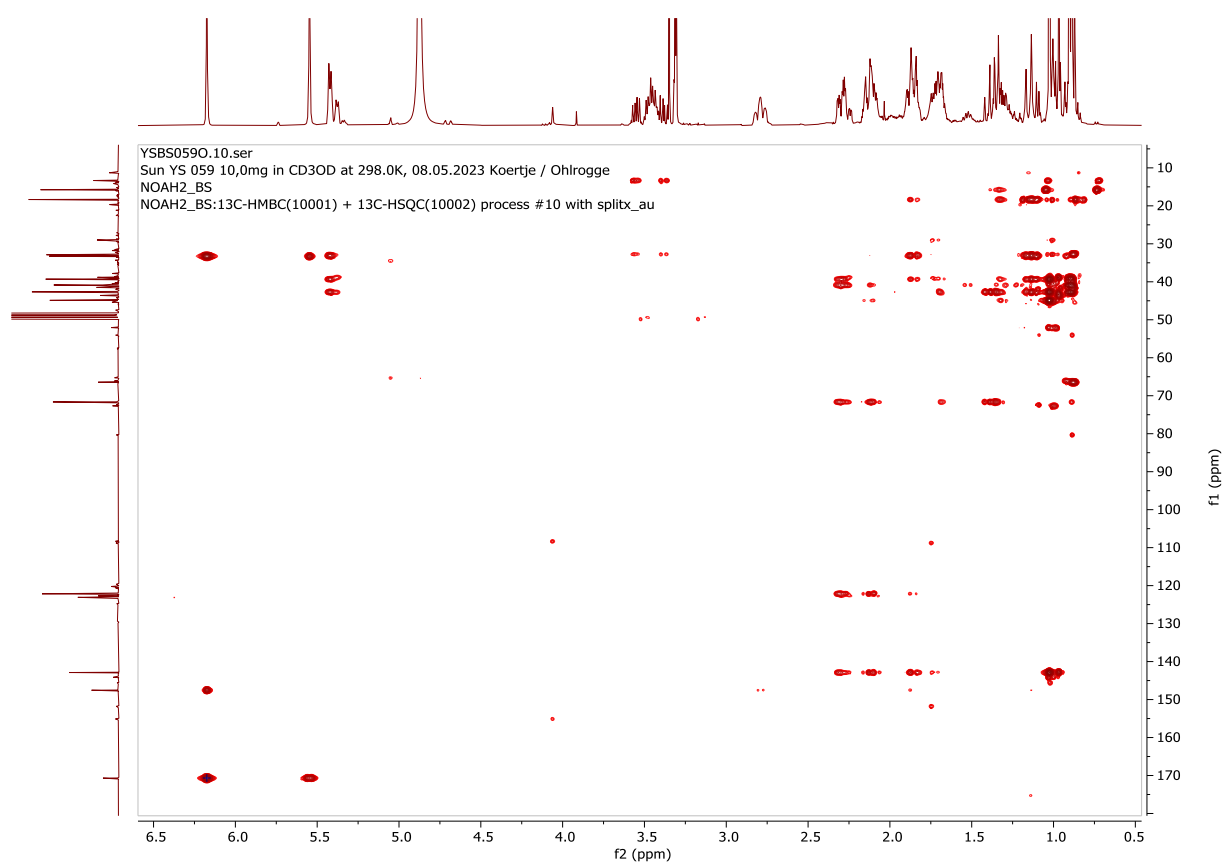

Figure S142 HMBC-spectrum of **23** and **24** mixture recorded at 400, 100 MHz in CD<sub>3</sub>OD

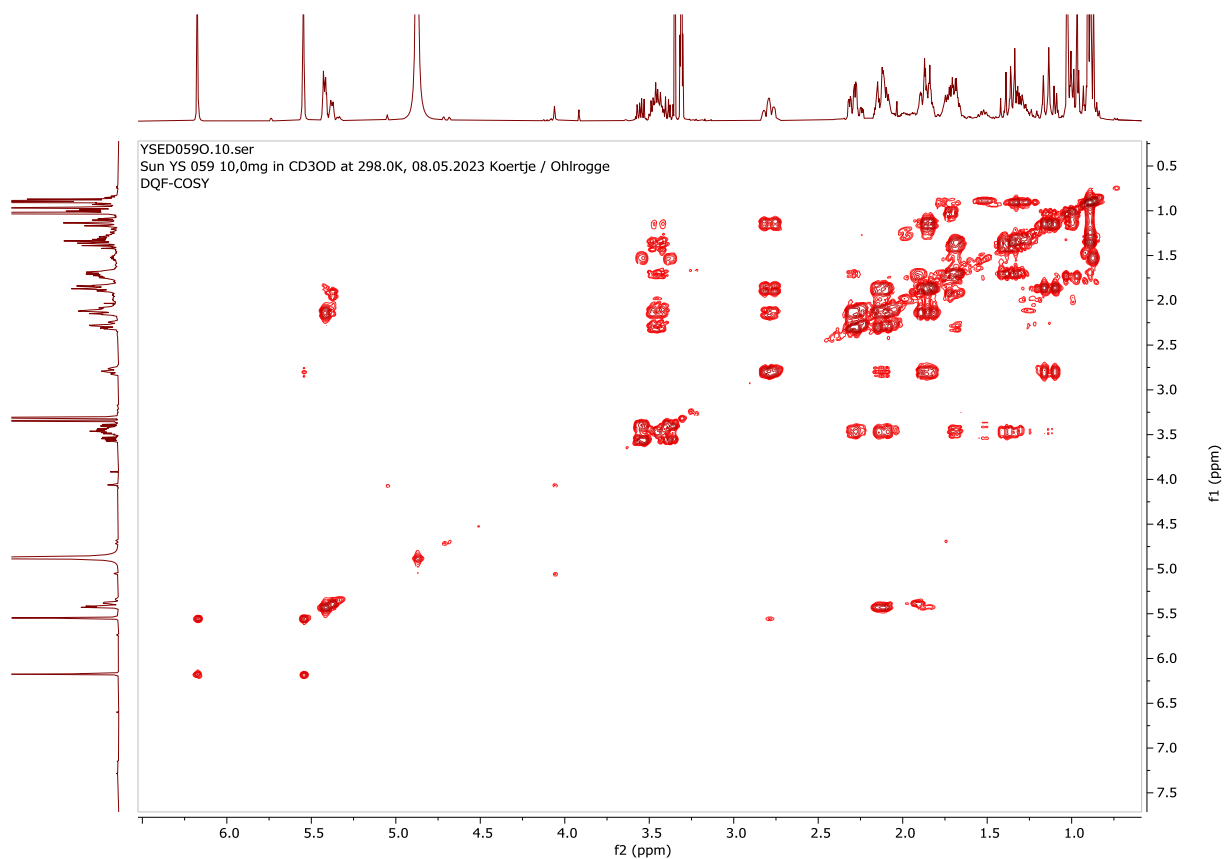

Figure S143  $^1\text{H}$ ,  $^1\text{H}$ -COSY-spectrum of **23** and **24** mixture recorded at 400 MHz in  $\text{CD}_3\text{OD}$

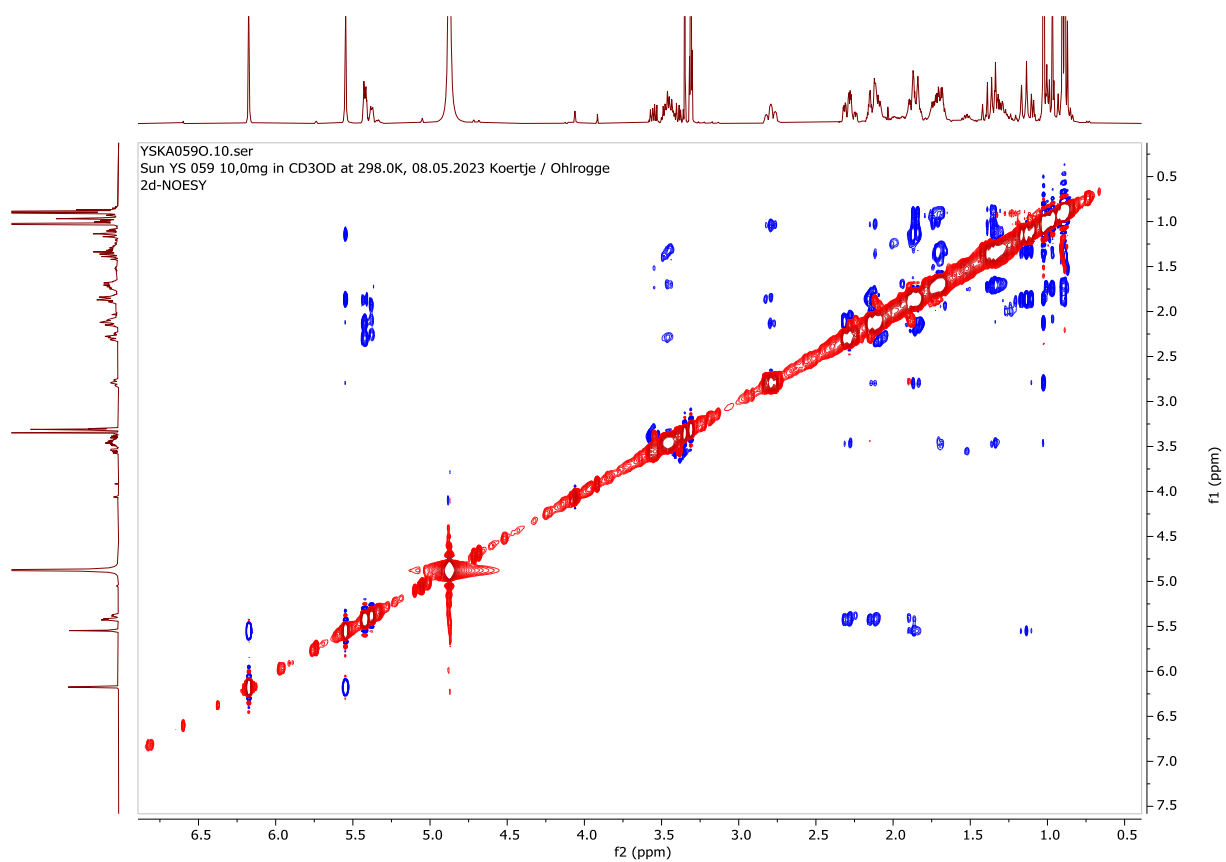

Figure S144 NOESY-spectrum of **23** and **24** mixture recorded at 400 MHz in  $\text{CD}_3\text{OD}$



## 6. References

- 1 D. S. Tian, E. Kuhnert, J. Ouazzani, D. Wibberg, J. Kalinowski and R. J. Cox, *Chem Sci*, 2020, **11**, 12477–12484.
- 2 R. Nofiani, K. de Mattos-Shiple, K. E. Lebe, L. C. Han, Z. Iqbal, A. M. Bailey, C. L. Willis, T. J. Simpson and R. J. Cox, *Nature Communications* 2018 9:1, 2018, **9**, 1–11.
- 3 E. Kuhnert, F. Surup, V. Wiebach, S. Bernecker and M. Stadler, , DOI:10.1016/j.phytochem.2015.06.002.
- 4 Z. Cheng, J. Zhao, D. Liu, P. Proksch, Z. Zhao and W. Lin, *J Nat Prod*, 2016, **79**, 1035–1047.
- 5 Z. Y. Huang, Q. Y. Wu, C. X. Li, H. L. Yu and J. H. Xu, *J Agric Food Chem*, 2022, **2022**, 5868.
- 6 B. Felicetti and D. E. Cane, *J Am Chem Soc*, 2004, **126**, 7212–7221.
